# Supplementary material for: Betacoronaviruses SARS-CoV-2 and HCoV-OC43 infections in IGROV-1 cell line require aryl hydrocarbon receptor
Source: Emerg Microbes Infect. 2023 Sep 6;12(2):2256416. doi: 10.1080/22221751.2023.2256416 (PMC10512916; doi:10.1080/22221751.2023.2256416)
Supplement: Supplemental Material [file TEMI_A_2256416_SM8709.xlsx]

## Sheet: Legend
Supplementary Table 1
Normalized mRNA and protein expression of ACE2 and TMPRSS2 across all cell lines available in the CCLE database
	cell_line	Name of the cell line
	ACE2_RNA	Normalized mRNA exression of ACE2
	ACE2_prot	Normalized protein exression of ACE2
	TMPRSS2_RNA	Normalized mRNA exression of TMPRSS2
	TMPRSS2_prot	Normalized protein exression of TMPRSS2
	threshold_ACE2	Whether the cell line has ACE2 mRNA and protein expressions > 1

## Sheet: CCLE ACE2 TMPRSS2 normalized
cell_line	ACE2_RNA	ACE2_prot	TMPRSS2_RNA	TMPRSS2_prot	threshold_ACE2
HCC1954_BREAST	4.61682	1.68405	3.75053	NA	TRUE
IGROV1_OVARY	5.51935	3.51081	-1.11525	-1.03454	TRUE
SNUC1_LARGE_INTESTINE	4.92346	2.50648	8.04055	3.49261	TRUE
HEC50B_ENDOMETRIUM	3.22377	2.82208	-3.4788	NA	TRUE
KP2_PANCREAS	3.63931	6.1693	0.446148	NA	TRUE
A704_KIDNEY	2.58805	2.05601	-4.58937	NA	TRUE
OV90_OVARY	8.48248	5.10325	2.91411	NA	TRUE
HCC1937_BREAST	6.9889	4.53783	4.42436	NA	TRUE
NCIH292_LUNG	1.13432	1.66195	-0.75166	NA	TRUE
MDAMB468_BREAST	1.85027	NA	6.90499	NA	FALSE
SH4_SKIN	-1.30595	NA	-1.42287	NA	FALSE
KMRC1_KIDNEY	-2.66022	NA	1.61837	NA	FALSE
RPMI7951_SKIN	-3.12597	NA	-1.43109	NA	FALSE
RERFLCMS_LUNG	-2.07979	NA	-3.33245	NA	FALSE
IGR37_SKIN	-3.59551	NA	-0.344737	NA	FALSE
VMRCRCW_KIDNEY	-3.49704	NA	-1.99885	NA	FALSE
HEP3B217_LIVER	-3.70648	NA	3.11236	NA	FALSE
HEPG2_LIVER	1.57162	NA	3.47779	NA	FALSE
SKHEP1_LIVER	-2.90028	NA	-7.01057	NA	FALSE
WM2664_SKIN	-0.606179	NA	0.367241	NA	FALSE
KMRC20_KIDNEY	1.71248	NA	-2.33355	NA	FALSE
HS294T_SKIN	0.608465	NA	1.95856	NA	FALSE
CAOV3_OVARY	-0.613561	NA	0.377854	NA	FALSE
JMSU1_URINARY_TRACT	-3.29687	NA	-2.55544	NA	FALSE
PATU8988T_PANCREAS	-3.38019	NA	-2.99457	-0.559849	FALSE
JIMT1_BREAST	0.0626808	NA	-0.389406	-0.357596	FALSE
COV362_OVARY	-1.43022	NA	1.17189	1.20018	FALSE
KPL1_BREAST	-3.33634	NA	5.10124	-0.0887506	FALSE
A375_SKIN	-2.47887	NA	-1.98313	-0.897535	FALSE
A2058_SKIN	-2.68867	NA	-2.44872	-0.406276	FALSE
SW620_LARGE_INTESTINE	-2.48597	NA	6.30041	0.403895	FALSE
MDST8_LARGE_INTESTINE	-3.61031	NA	-2.33376	0.925765	FALSE
HUH1_LIVER	-4.58004	NA	0.332541	-0.69531	FALSE
HCT116_LARGE_INTESTINE	-5.99688	NA	-3.98669	NA	FALSE
HLF_LIVER	-3.74358	NA	-5.4661	NA	FALSE
HT29_LARGE_INTESTINE	-2.88979	NA	5.24603	NA	FALSE
CAMA1_BREAST	-3.01523	NA	-0.507695	NA	FALSE
RKO_LARGE_INTESTINE	-4.77505	NA	-7.01057	NA	FALSE
HT115_LARGE_INTESTINE	0.754981	NA	7.64262	NA	FALSE
JHH5_LIVER	-1.35236	NA	1.6667	NA	FALSE
SKMEL3_SKIN	-1.6113	NA	-1.6753	NA	FALSE
NCIH358_LUNG	-1.88397	NA	-0.859131	-0.72501	FALSE
HGC27_STOMACH	-4.08287	NA	-3.91412	-0.455188	FALSE
DMS273_LUNG	-3.48505	NA	-7.01057	-0.173333	FALSE
NCIH1299_LUNG	-1.82046	NA	-4.73598	-0.880058	FALSE
SKMEL28_SKIN	-0.691921	NA	-0.947109	-1.04487	FALSE
CAKI2_KIDNEY	-0.752925	NA	-2.90779	-0.109837	FALSE
NCIH1048_LUNG	-1.6756	NA	3.95427	0.326723	FALSE
HSC3_UPPER_AERODIGESTIVE_TRACT	-1.63653	NA	-5.19113	-1.52602	FALSE
SW403_LARGE_INTESTINE	-0.0827567	NA	6.63151	1.96261	FALSE
BT549_BREAST	-3.54374	NA	-3.34011	-1.00343	FALSE
CAL851_BREAST	1.97536	NA	2.82143	0.206626	FALSE
MDAMB157_BREAST	-2.44873	NA	-1.62214	-0.613673	FALSE
SW48_LARGE_INTESTINE	-1.45692	NA	-0.591302	-1.04994	FALSE
IGR39_SKIN	-3.05009	NA	-7.01057	-0.735618	FALSE
MCF7_BREAST	-2.93518	-0.00853858	2.27583	NA	FALSE
BICR6_UPPER_AERODIGESTIVE_TRACT	4.04628	0.574742	4.907	NA	FALSE
WM1799_SKIN	-1.718	-0.849292	-1.0704	NA	FALSE
IPC298_SKIN	-1.84098	-0.592513	-1.0247	NA	FALSE
NCIH1693_LUNG	-1.88588	0.0170492	-1.73802	NA	FALSE
TYKNU_OVARY	-2.85959	-0.401894	-4.02811	NA	FALSE
DMS114_LUNG	-7.01057	-0.414971	-3.37096	NA	FALSE
TE1_OESOPHAGUS	-1.43216	-0.0667961	0.790447	NA	FALSE
TCCPAN2_PANCREAS	-1.1025	NA	-1.65802	-0.63437	FALSE
LUDLU1_LUNG	1.66633	NA	-1.52994	-0.414257	FALSE
MELJUSO_SKIN	-2.38849	NA	-1.70508	-0.673605	FALSE
T47D_BREAST	-2.62928	NA	4.31826	-0.224592	FALSE
LS411N_LARGE_INTESTINE	-0.636056	NA	5.84136	0.787965	FALSE
PC3_PROSTATE	-1.64276	NA	4.65204	0.164926	FALSE
KYSE450_OESOPHAGUS	-0.191723	NA	-0.947194	-0.336751	FALSE
RT112_URINARY_TRACT	0.95112	NA	2.01788	0.0271945	FALSE
LS513_LARGE_INTESTINE	1.99786	NA	7.13727	1.85488	FALSE
HCC827_LUNG	-1.47883	NA	-2.39152	NA	FALSE
MIAPACA2_PANCREAS	-4.59212	NA	-1.43407	NA	FALSE
NCIH520_LUNG	-1.59223	NA	0.219777	NA	FALSE
SW480_LARGE_INTESTINE	-2.77285	NA	2.5081	NA	FALSE
OE33_OESOPHAGUS	0.289733	NA	5.28258	NA	FALSE
ZR751_BREAST	-2.83706	NA	1.67913	NA	FALSE
COLO679_SKIN	-1.913	NA	-0.422221	NA	FALSE
HCC38_BREAST	-1.58599	NA	5.90095	NA	FALSE
QGP1_PANCREAS	-2.77492	NA	0.536591	NA	FALSE
HCC95_LUNG	-0.114754	NA	-3.22239	NA	FALSE
LK2_LUNG	-4.0396	NA	2.47431	NA	FALSE
OVCAR4_OVARY	0.216406	NA	1.53902	NA	FALSE
COLO741_SKIN	-1.84838	NA	-0.911119	NA	FALSE
UACC257_SKIN	-1.3601	NA	1.93925	NA	FALSE
NCIH1573_LUNG	0.0303691	NA	3.54699	-1.31365	FALSE
A549_LUNG	-3.71754	NA	-7.01057	-0.811529	FALSE
SU8686_PANCREAS	0.460727	NA	6.69797	1.8446	FALSE
TE14_OESOPHAGUS	1.16202	NA	-0.0308267	-0.804497	FALSE
NCIH2170_LUNG	-3.78141	NA	-3.45344	0.922795	FALSE
HCC1500_BREAST	-3.64252	NA	4.15756	-0.027695	FALSE
MDAMB436_BREAST	-2.54308	NA	-2.1797	-1.16127	FALSE
DV90_LUNG	-2.92002	NA	4.17158	-0.395037	FALSE
SNU61_LARGE_INTESTINE	1.7066	NA	7.1694	2.13179	FALSE
SBC5_LUNG	-3.19044	NA	-4.36676	-0.680851	FALSE
HT1376_URINARY_TRACT	1.82566	NA	0.373316	-1.34615	FALSE
CFPAC1_PANCREAS	0.362944	NA	4.95174	1.24192	FALSE
NCIH1975_LUNG	-2.40428	NA	-2.06115	-1.248	FALSE
COLO678_LARGE_INTESTINE	0.725434	NA	1.13216	-0.833446	FALSE
SNU119_OVARY	0.0995213	NA	1.16602	-0.12213	FALSE
CORL105_LUNG	-3.36689	NA	-1.7333	-2.00823	FALSE
HCC70_BREAST	1.74356	NA	7.12894	3.04179	FALSE
AGS_STOMACH	-3.36016	NA	5.05712	NA	FALSE
HCC1143_BREAST	-3.70636	NA	4.37594	NA	FALSE
NCIH1666_LUNG	-0.211244	NA	-3.6329	NA	FALSE
NCIH2291_LUNG	-0.819683	NA	4.54294	NA	FALSE
NCIH747_LARGE_INTESTINE	-0.361829	NA	3.06013	NA	FALSE
NCIH838_LUNG	-4.41957	NA	-4.81227	NA	FALSE
FUOV1_OVARY	-1.02482	NA	-0.135946	NA	FALSE
RERFLCSQ1_LUNG	-3.25447	NA	-2.91583	NA	FALSE
DETROIT562_UPPER_AERODIGESTIVE_TRACT	0.338782	NA	3.40025	NA	FALSE
L33_PANCREAS	-2.2589	NA	-1.53348	NA	FALSE
MKN45_STOMACH	0.426677	NA	3.82174	NA	FALSE
MKN7_STOMACH	1.24028	NA	0.818247	NA	FALSE
NCIH1793_LUNG	-2.08978	NA	-0.863943	NA	FALSE
NCIH2228_LUNG	-2.2162	NA	3.89211	NA	FALSE
NCIH661_LUNG	-4.12502	NA	-3.69648	NA	FALSE
SNUC2A_LARGE_INTESTINE	0.434265	NA	3.51271	NA	FALSE
TE6_OESOPHAGUS	-1.156	NA	-2.63706	NA	FALSE
LCLC103H_LUNG	-3.07645	-0.385317	1.03021	-0.728437	FALSE
LOXIMVI_SKIN	-3.54923	-0.544425	-3.16732	0.0225473	FALSE
MDAMB453_BREAST	-3.45663	-1.5357	4.12127	0.176301	FALSE
NCIH1703_LUNG	-2.15611	0.195581	-3.35097	-0.135556	FALSE
NCIH196_LUNG	-3.92443	-0.941542	-5.84148	-1.68767	FALSE
NCIH2009_LUNG	-1.7166	-2.33845	0.11317	-0.753037	FALSE
NCIH2286_LUNG	-4.02565	-0.775896	-5.56209	-0.132248	FALSE
CORL47_LUNG	-3.20956	NA	-2.71785	-1.74518	FALSE
HCC1187_BREAST	-0.0380222	NA	6.51358	0.909544	FALSE
HUH6_LIVER	1.12684	NA	5.81226	2.52791	FALSE
NCIH146_LUNG	-3.58575	NA	-1.16539	-1.14277	FALSE
SNU1_STOMACH	-3.55386	NA	-2.31301	-1.32456	FALSE
NCIH23_LUNG	-2.5004	NA	-2.29504	-1.56884	FALSE
OSRC2_KIDNEY	-0.812736	NA	-1.95358	-1.66646	FALSE
SW948_LARGE_INTESTINE	1.33103	NA	6.77852	1.81098	FALSE
CORL88_LUNG	-1.12834	NA	-2.96345	-1.10276	FALSE
HCC2218_BREAST	-1.81089	NA	4.97023	1.73293	FALSE
HCC44_LUNG	-4.04313	NA	-4.31967	-0.786652	FALSE
HSC4_UPPER_AERODIGESTIVE_TRACT	1.64478	NA	1.13509	-0.994385	FALSE
NCIH2172_LUNG	-1.4203	NA	-3.13317	-2.37672	FALSE
TCCSUP_URINARY_TRACT	-1.71527	NA	1.62172	0.0123141	FALSE
TE11_OESOPHAGUS	0.811771	NA	-2.98251	-0.866138	FALSE
UACC62_SKIN	-2.4277	NA	-0.968328	-1.71032	FALSE
VCAP_PROSTATE	-2.7358	NA	9.46936	5.54011	FALSE
EFM19_BREAST	-5.40905	NA	3.67329	-0.166477	FALSE
HUG1N_STOMACH	-1.84264	NA	7.0017	2.69792	FALSE
KYSE510_OESOPHAGUS	1.95088	NA	2.5392	-0.557807	FALSE
LU65_LUNG	-4.73977	NA	-2.77376	-1.63605	FALSE
NCIH460_LUNG	-0.741031	NA	-4.2943	-0.603411	FALSE
NCIH522_LUNG	-5.54772	NA	-5.1487	-0.0565725	FALSE
SKMEL30_SKIN	-2.1307	NA	-1.24309	0.24188	FALSE
SW1990_PANCREAS	-1.92682	NA	-2.7839	0.130039	FALSE
A673_BONE	-1.77623	NA	-4.99135	NA	FALSE
MDAMB231_BREAST	-0.264364	NA	0.930406	NA	FALSE
HEYA8_OVARY	-4.10541	NA	-3.67609	NA	FALSE
RH41_SOFT_TISSUE	-1.5277	NA	-3.93602	NA	FALSE
KMS12BM_HAEMATOPOIETIC_AND_LYMPHOID_TISSUE	-4.37752	NA	-5.38701	NA	FALSE
LN229_CENTRAL_NERVOUS_SYSTEM	-1.31219	NA	-3.55071	NA	FALSE
LS180_LARGE_INTESTINE	-1.175	NA	6.58804	NA	FALSE
MOLM13_HAEMATOPOIETIC_AND_LYMPHOID_TISSUE	-5.18069	NA	-2.5883	NA	FALSE
KARPAS299_HAEMATOPOIETIC_AND_LYMPHOID_TISSUE	-4.32343	NA	-2.89611	NA	FALSE
CAL120_BREAST	-1.84269	NA	-5.30801	NA	FALSE
DU145_PROSTATE	-3.90101	NA	-1.94739	NA	FALSE
G401_SOFT_TISSUE	-5.01164	NA	-4.68978	NA	FALSE
JHUEM2_ENDOMETRIUM	-3.75521	NA	-2.48805	NA	FALSE
KARPAS422_HAEMATOPOIETIC_AND_LYMPHOID_TISSUE	-3.32482	NA	-2.2498	NA	FALSE
KASUMI1_HAEMATOPOIETIC_AND_LYMPHOID_TISSUE	-3.91232	NA	-4.92595	NA	FALSE
HCC15_LUNG	-3.44599	NA	-5.44041	NA	FALSE
U87MG_CENTRAL_NERVOUS_SYSTEM	-2.74274	NA	-4.1852	NA	FALSE
ASPC1_PANCREAS	0.49674	-0.0667283	7.04357	NA	FALSE
SNU719_STOMACH	-0.393108	-0.276729	5.67352	NA	FALSE
CORL23_LUNG	-1.72039	0.113125	2.91399	NA	FALSE
F36P_HAEMATOPOIETIC_AND_LYMPHOID_TISSUE	-2.33237	-0.841364	-4.6104	NA	FALSE
KNS81_CENTRAL_NERVOUS_SYSTEM	-1.94847	0.157194	-2.65693	NA	FALSE
OCIAML5_HAEMATOPOIETIC_AND_LYMPHOID_TISSUE	-3.08444	-0.628199	-1.90311	NA	FALSE
TE10_OESOPHAGUS	-1.44055	-0.745368	-0.708677	NA	FALSE
WM115_SKIN	-2.32809	-0.478471	-1.8588	NA	FALSE
EOL1_HAEMATOPOIETIC_AND_LYMPHOID_TISSUE	-2.97798	NA	-4.98444	NA	FALSE
SW1573_LUNG	-4.98595	NA	-1.76926	NA	FALSE
HEL9217_HAEMATOPOIETIC_AND_LYMPHOID_TISSUE	-7.01057	NA	-4.73481	NA	FALSE
K029AX_SKIN	-1.67442	NA	1.31186	NA	FALSE
JHOS2_OVARY	0.753843	NA	2.74886	NA	FALSE
SNU685_ENDOMETRIUM	-3.28076	NA	-3.39644	NA	FALSE
NIHOVCAR3_OVARY	-2.1977	NA	2.81951	NA	FALSE
SAOS2_BONE	-1.8805	NA	-0.697587	NA	FALSE
TE4_OESOPHAGUS	0.969667	NA	2.9501	NA	FALSE
JHH1_LIVER	0.821292	NA	-1.48357	NA	FALSE
SW1271_LUNG	-3.38017	NA	-4.1767	NA	FALSE
NCIH226_LUNG	-3.33852	NA	-3.66911	NA	FALSE
REC1_HAEMATOPOIETIC_AND_LYMPHOID_TISSUE	-3.42781	NA	-3.42781	NA	FALSE
HT1080_SOFT_TISSUE	-3.31908	NA	-4.52915	NA	FALSE
KYSE30_OESOPHAGUS	0.771776	NA	-0.234508	NA	FALSE
U2OS_BONE	-4.75779	NA	0.86283	NA	FALSE
GB1_CENTRAL_NERVOUS_SYSTEM	-2.54137	NA	-4.43131	NA	FALSE
IALM_LUNG	-4.41312	NA	-2.04188	NA	FALSE
CMK_HAEMATOPOIETIC_AND_LYMPHOID_TISSUE	-3.50024	NA	-3.03547	NA	FALSE
COLO829_SKIN	-1.47607	NA	-0.591109	NA	FALSE
NCIH647_LUNG	-1.75112	NA	-0.17091	NA	FALSE
OV56_OVARY	-2.46092	NA	-2.40876	NA	FALSE
RH30_SOFT_TISSUE	-3.46523	NA	-3.2606	NA	FALSE
RPMI8226_HAEMATOPOIETIC_AND_LYMPHOID_TISSUE	-3.94514	NA	2.94424	NA	FALSE
SJSA1_BONE	-2.6992	NA	-3.09022	NA	FALSE
HEC6_ENDOMETRIUM	-2.85159	NA	-4.41144	NA	FALSE
SW837_LARGE_INTESTINE	0.267037	NA	4.17274	NA	FALSE
CAKI1_KIDNEY	-3.21015	0.275419	-4.00081	NA	FALSE
KU1919_URINARY_TRACT	-5.81115	0.557208	-1.39676	NA	FALSE
MFE296_ENDOMETRIUM	-3.34321	-1.05674	-0.904327	NA	FALSE
NCIH716_LARGE_INTESTINE	0.281076	-1.15228	-1.72056	NA	FALSE
NUDHL1_HAEMATOPOIETIC_AND_LYMPHOID_TISSUE	-3.32417	-1.70055	-4.02388	NA	FALSE
OCILY3_HAEMATOPOIETIC_AND_LYMPHOID_TISSUE	-2.91205	-2.5469	-3.11277	NA	FALSE
SKNMC_BONE	-2.74926	-2.4668	-3.67592	NA	FALSE
CHAGOK1_LUNG	-1.53196	NA	1.62564	NA	FALSE
EFM192A_BREAST	-1.79308	NA	4.02683	NA	FALSE
HEC265_ENDOMETRIUM	-2.10961	NA	-5.46207	NA	FALSE
PANC1_PANCREAS	-3.67335	NA	4.20535	NA	FALSE
RT4_URINARY_TRACT	0.203045	NA	6.92999	NA	FALSE
T24_URINARY_TRACT	-3.0489	NA	-4.15283	NA	FALSE
TF1_HAEMATOPOIETIC_AND_LYMPHOID_TISSUE	-2.03257	NA	-4.40508	NA	FALSE
A101D_SKIN	-0.13048	NA	-0.506501	NA	FALSE
DAOY_CENTRAL_NERVOUS_SYSTEM	-4.06412	NA	2.64239	NA	FALSE
JM1_HAEMATOPOIETIC_AND_LYMPHOID_TISSUE	-2.73623	NA	0.190106	NA	FALSE
KASUMI2_HAEMATOPOIETIC_AND_LYMPHOID_TISSUE	-2.40746	NA	-2.6749	NA	FALSE
KYM1_SOFT_TISSUE	-2.93776	NA	-3.61868	NA	FALSE
KYSE410_OESOPHAGUS	-3.02349	NA	0.290262	NA	FALSE
NCIH446_LUNG	-2.99561	NA	-4.8188	NA	FALSE
SKNAS_AUTONOMIC_GANGLIA	-2.97496	NA	-4.33476	NA	FALSE
DANG_PANCREAS	-2.3761	NA	-1.75957	NA	FALSE
KNS42_CENTRAL_NERVOUS_SYSTEM	-1.63583	NA	1.33342	NA	FALSE
HEC108_ENDOMETRIUM	-1.56572	NA	-3.4968	NA	FALSE
JEKO1_HAEMATOPOIETIC_AND_LYMPHOID_TISSUE	-3.27912	NA	-0.552416	NA	FALSE
JURKAT_HAEMATOPOIETIC_AND_LYMPHOID_TISSUE	-3.54133	NA	-2.14218	NA	FALSE
MSTO211H_PLEURA	-4.68861	NA	-7.01057	NA	FALSE
OCUM1_STOMACH	1.8158	NA	7.48361	NA	FALSE
SNU449_LIVER	1.96235	NA	-3.52296	NA	FALSE
HCC1833_LUNG	-3.69453	NA	1.97158	NA	FALSE
PANC0403_PANCREAS	-1.17234	NA	5.2496	NA	FALSE
J82_URINARY_TRACT	-2.04904	NA	-2.73928	NA	FALSE
JHH4_LIVER	-2.41537	NA	-4.363	NA	FALSE
OVSAHO_OVARY	-2.05052	NA	2.66283	NA	FALSE
RL_HAEMATOPOIETIC_AND_LYMPHOID_TISSUE	-4.83858	NA	-3.48458	NA	FALSE
SNUC5_LARGE_INTESTINE	-7.01057	NA	2.49679	NA	FALSE
SUDHL6_HAEMATOPOIETIC_AND_LYMPHOID_TISSUE	-1.76341	NA	-2.80876	NA	FALSE
SKLU1_LUNG	-3.31415	NA	-3.31415	NA	FALSE
ISHIKAWAHERAKLIO02ER_ENDOMETRIUM	-2.55784	NA	5.77029	NA	FALSE
SNGM_ENDOMETRIUM	-1.08499	NA	-3.06645	NA	FALSE
GAMG_CENTRAL_NERVOUS_SYSTEM	-2.2528	NA	-1.46849	NA	FALSE
NCIH929_HAEMATOPOIETIC_AND_LYMPHOID_TISSUE	-3.12152	NA	-4.26882	NA	FALSE
PANC0203_PANCREAS	-1.6825	NA	2.49506	NA	FALSE
RCHACV_HAEMATOPOIETIC_AND_LYMPHOID_TISSUE	-2.70412	NA	-3.68611	NA	FALSE
SNU423_LIVER	-2.78785	NA	-4.82973	NA	FALSE
SNU1079_BILIARY_TRACT	-3.35726	NA	-4.15527	NA	FALSE
A204_SOFT_TISSUE	-5.1464	NA	-2.30539	NA	FALSE
BXPC3_PANCREAS	1.00303	NA	-2.83981	NA	FALSE
CALU1_LUNG	-4.00861	NA	-1.30793	NA	FALSE
HEC251_ENDOMETRIUM	-0.637303	NA	0.688795	NA	FALSE
HEL_HAEMATOPOIETIC_AND_LYMPHOID_TISSUE	-3.5641	NA	-7.01057	NA	FALSE
KYSE180_OESOPHAGUS	-2.49212	NA	-5.51152	NA	FALSE
MONOMAC1_HAEMATOPOIETIC_AND_LYMPHOID_TISSUE	-4.50547	NA	-5.2714	NA	FALSE
SF295_CENTRAL_NERVOUS_SYSTEM	-2.64976	NA	-1.99826	NA	FALSE
SKMEL5_SKIN	-1.01938	NA	-2.29556	NA	FALSE
PC14_LUNG	1.57044	NA	-2.11115	NA	FALSE
EBC1_LUNG	-3.81388	NA	-2.70405	NA	FALSE
MEWO_SKIN	-2.91304	NA	0.467669	NA	FALSE
HS944T_SKIN	-1.89679	NA	-2.23681	NA	FALSE
JHH7_LIVER	-1.16662	NA	-1.38013	NA	FALSE
RVH421_SKIN	-0.592389	NA	0.194702	NA	FALSE
A498_KIDNEY	-2.47635	NA	-4.17091	NA	FALSE
HS695T_SKIN	-2.34479	NA	-0.885533	NA	FALSE
IGR1_SKIN	-1.32534	NA	-3.47947	-1.57747	FALSE
SUIT2_PANCREAS	1.49921	NA	-1.89852	1.00226	FALSE
LN18_CENTRAL_NERVOUS_SYSTEM	-3.88893	NA	1.16606	-1.52585	FALSE
LNCAPCLONEFGC_PROSTATE	-0.779451	NA	10.78	6.89087	FALSE
NCIH650_LUNG	-3.69769	NA	-4.21183	-0.257882	FALSE
REH_HAEMATOPOIETIC_AND_LYMPHOID_TISSUE	-3.623	NA	-3.94671	0.0929177	FALSE
HEC1A_ENDOMETRIUM	-1.03153	NA	-3.67016	NA	FALSE
HUPT3_PANCREAS	-2.41244	NA	2.76257	NA	FALSE
KMS27_HAEMATOPOIETIC_AND_LYMPHOID_TISSUE	-3.17342	NA	-3.70877	NA	FALSE
LXF289_LUNG	-3.95466	NA	-2.30548	NA	FALSE
SNU1105_CENTRAL_NERVOUS_SYSTEM	-2.43083	NA	-1.38493	NA	FALSE
U937_HAEMATOPOIETIC_AND_LYMPHOID_TISSUE	-4.12612	NA	-3.76077	NA	FALSE
WM88_SKIN	-0.357949	-1.37025	-0.828787	NA	FALSE
KMS11_HAEMATOPOIETIC_AND_LYMPHOID_TISSUE	-3.85756	-1.25832	0.34844	NA	FALSE
NALM6_HAEMATOPOIETIC_AND_LYMPHOID_TISSUE	-3.74014	-0.789701	-4.92532	NA	FALSE
NCIH2052_PLEURA	-3.90943	-0.756171	-4.7504	NA	FALSE
SKES1_BONE	-2.59686	-0.800278	-2.92644	NA	FALSE
MFE280_ENDOMETRIUM	0.0189737	-0.675267	-2.85477	NA	FALSE
HCC1806_BREAST	1.32661	NA	3.62881	NA	FALSE
COLO320_LARGE_INTESTINE	-2.16249	NA	-3.727	NA	FALSE
NCIH1581_LUNG	-2.75099	NA	-3.4386	NA	FALSE
NCIH1792_LUNG	-2.69366	NA	-2.54083	NA	FALSE
NCIH2066_LUNG	-4.49994	NA	2.87426	NA	FALSE
SQ1_LUNG	-1.33197	NA	-1.81434	NA	FALSE
A2780_OVARY	-4.73737	NA	-4.4764	NA	FALSE
MKN1_STOMACH	-0.474212	NA	3.74632	NA	FALSE
HCC1395_BREAST	-3.54575	NA	-1.83489	-0.396043	FALSE
SW1417_LARGE_INTESTINE	-0.750431	NA	6.87153	1.90433	FALSE
NCIH1435_LUNG	1.61918	NA	4.6206	0.175129	FALSE
NCIH1944_LUNG	0.373505	NA	-6.22917	-0.752793	FALSE
NCIH441_LUNG	-0.0230397	NA	7.07515	1.27802	FALSE
KURAMOCHI_OVARY	-0.313569	NA	0.620516	-1.07452	FALSE
KATOIII_STOMACH	0.485379	NA	6.05961	-0.26333	FALSE
UBLC1_URINARY_TRACT	1.95417	NA	3.66497	0.345525	FALSE
MFE319_ENDOMETRIUM	-1.87202	NA	-1.92697	NA	FALSE
HDMYZ_HAEMATOPOIETIC_AND_LYMPHOID_TISSUE	-4.77946	NA	-3.79123	NA	FALSE
JHH6_LIVER	-1.81335	NA	-0.74686	NA	FALSE
L428_HAEMATOPOIETIC_AND_LYMPHOID_TISSUE	-4.41379	NA	-0.185955	NA	FALSE
LMSU_STOMACH	-3.84742	NA	2.05418	NA	FALSE
HUPT4_PANCREAS	0.973708	NA	6.31152	NA	FALSE
SW1783_CENTRAL_NERVOUS_SYSTEM	-0.530944	NA	-3.57701	NA	FALSE
UMUC3_URINARY_TRACT	-3.80373	NA	-3.32212	NA	FALSE
G402_SOFT_TISSUE	-3.3753	NA	-3.48113	2.5419	FALSE
U118MG_CENTRAL_NERVOUS_SYSTEM	-3.65243	NA	-3.74195	-0.331948	FALSE
KYSE150_OESOPHAGUS	-1.54131	NA	-3.20422	-1.71107	FALSE
NCIH1155_LUNG	-2.09754	NA	-5.06881	-1.7754	FALSE
NCIN87_STOMACH	-0.821597	NA	1.24944	-0.435369	FALSE
OPM2_HAEMATOPOIETIC_AND_LYMPHOID_TISSUE	-1.84308	NA	-3.47605	-0.565809	FALSE
SUDHL4_HAEMATOPOIETIC_AND_LYMPHOID_TISSUE	-4.32003	NA	-4.58714	-1.09665	FALSE
C32_SKIN	-1.31958	NA	-1.38387	-1.1841	FALSE
HEC59_ENDOMETRIUM	0.788329	NA	3.06457	1.02618	FALSE
K562_HAEMATOPOIETIC_AND_LYMPHOID_TISSUE	-3.26602	NA	-2.61574	-0.519773	FALSE
NUGC3_STOMACH	-2.3612	NA	2.45196	1.43365	FALSE
RD_SOFT_TISSUE	-3.19397	NA	-4.22596	-0.298768	FALSE
SEM_HAEMATOPOIETIC_AND_LYMPHOID_TISSUE	-2.67189	NA	-5.36115	-0.132448	FALSE
SHP77_LUNG	-3.99658	NA	-4.57129	-1.11225	FALSE
TC71_BONE	-2.98671	NA	-5.4086	0.67085	FALSE
HCT15_LARGE_INTESTINE	-3.54396	-0.417092	1.68381	NA	FALSE
KYSE70_OESOPHAGUS	0.736422	-1.99226	-2.48204	NA	FALSE
NCIH1355_LUNG	1.02568	0.0892999	-4.79258	NA	FALSE
NCIH1437_LUNG	1.41011	-0.445322	3.17748	NA	FALSE
NCIH2122_LUNG	1.54219	0.189508	1.27186	NA	FALSE
TUHR4TKB_KIDNEY	-3.14949	-0.505097	-2.59801	NA	FALSE
WM793_SKIN	-1.64466	-0.934298	-2.80891	NA	FALSE
NCIH2030_LUNG	-1.71058	-0.316148	-4.4992	NA	FALSE
A172_CENTRAL_NERVOUS_SYSTEM	-5.90459	NA	-4.52262	NA	FALSE
CALU6_LUNG	-4.0043	NA	-2.70609	NA	FALSE
FADU_UPPER_AERODIGESTIVE_TRACT	1.37043	NA	2.08062	NA	FALSE
KP4_PANCREAS	-2.4416	NA	-2.24328	NA	FALSE
MONOMAC6_HAEMATOPOIETIC_AND_LYMPHOID_TISSUE	-3.14187	NA	-5.11464	NA	FALSE
OVCAR8_OVARY	-3.86438	NA	-4.22609	NA	FALSE
THP1_HAEMATOPOIETIC_AND_LYMPHOID_TISSUE	-2.64713	NA	-2.88197	NA	FALSE
AU565_BREAST	2.31552	NA	4.73188	NA	NA
CAL51_BREAST	3.99328	NA	0.236157	NA	NA
ABC1_LUNG	3.22695	NA	-4.21031	NA	NA
HT1197_URINARY_TRACT	2.34575	NA	2.95019	0.610224	NA
HUH7_LIVER	2.37611	NA	-0.818789	-0.887961	NA
HT55_LARGE_INTESTINE	4.73704	NA	7.81384	3.43157	NA
HCC56_LARGE_INTESTINE	2.02763	NA	7.14367	3.23395	NA
NCIH2110_LUNG	3.00368	NA	-1.24549	NA	NA
NCIH1650_LUNG	2.7624	NA	2.00347	NA	NA
NCIH3255_LUNG	5.00029	NA	5.2757	1.75981	NA
NCIH2126_LUNG	2.02885	NA	5.45445	NA	NA
PECAPJ34CLONEC12_UPPER_AERODIGESTIVE_TRACT	2.17227	NA	2.00642	0.447558	NA
IM95_STOMACH	4.68258	NA	6.1779	NA	NA
MOLM16_HAEMATOPOIETIC_AND_LYMPHOID_TISSUE	5.2882	NA	-4.32725	NA	NA
SCC25_UPPER_AERODIGESTIVE_TRACT	2.84213	NA	-4.59292	NA	NA
CL34_LARGE_INTESTINE	2.21639	NA	7.21069	NA	NA
CCK81_LARGE_INTESTINE	2.33768	NA	6.55911	NA	NA
CAL27_UPPER_AERODIGESTIVE_TRACT	3.24569	NA	4.09721	NA	NA
RMUGS_OVARY	3.13777	NA	-0.823387	NA	NA
CAL33_UPPER_AERODIGESTIVE_TRACT	4.79368	NA	3.99809	NA	NA
BICR22_UPPER_AERODIGESTIVE_TRACT	3.69856	NA	0.722017	NA	NA
NCIH1568_LUNG	2.67065	NA	0.309281	-1.12358	NA
HDQP1_BREAST	3.88487	NA	3.46312	NA	NA
SKCO1_LARGE_INTESTINE	3.3737	NA	6.93646	3.93036	NA
BT20_BREAST	2.08883	NA	3.79188	NA	NA
