# Supplementary material for: Betacoronaviruses SARS-CoV-2 and HCoV-OC43 infections in IGROV-1 cell line require aryl hydrocarbon receptor
Source: Emerg Microbes Infect. 2023 Sep 6;12(2):2256416. doi: 10.1080/22221751.2023.2256416 (PMC10512916; doi:10.1080/22221751.2023.2256416)
Supplement: Supplemental Material [file TEMI_A_2256416_SM8721.xlsx]

## Sheet: Legend
Supplementary Table 3
List of genes identified from differential gene expression analysis in Huh7, NEC, and IGROV-1 infected with SARS-CoV-2, used for heatmap in Fig 3C.

## Sheet: Combined-GeneList
Gene
IGFN1
BACH2
TMEM154
PHF24
NUPR1
NOTUM
TRPM8
LURAP1L
COL13A1
SERPINA3
IGFBP1
CRYAB
ENTPD3
IL21R
DIO3
AKR1C2
INHBE
AKR1C1
UBE2L6
CEACAM1
TUBAL3
SH2D3C
S100P
PDK4
LOC400499
SIPA1L2
LCN2
CSF3R
AKR1C3
HLA-DMA
PRSS35
PLPPR3
THSD4
HMOX1
DOK5
GPHA2
FEZ1
AK7
OTOF
ABLIM3
TCP11L2
DOC2B
KLHDC7B
UNC5B
WIPI1
LINC00598
LINC00514
COL25A1
IL6
HLA-DMB
C1S
MEIS3
SAA2
LHFPL3-AS2
CYRIA
TUNAR
IL23A
PRSS8
NPR3
LOC101929613
IL1A
TSC22D3
FAM182B
CLIP2
SLPI
KLRD1
NALCN
PNPLA3
LCNL1
LOC105374584
SCART1
FAM182A
GLDN
LOC100420587
SGSM1
TRAPPC6A
SPP1
PPP1R32
GCNT3
CLGN
SH3GL3
LCP1
ACSS2
MAP1B
SERPINA5
CTH
NRTN
CFI
DMBT1
SLC6A12
ADAM5
TLR5
IGFBP3
COL8A2
CD69
TMEM159
MPZL2
ANKRD33
ADGRG1
UBXN10
H2BS1
IFI44
PSMC3IP
HPDL
KIF18B
DHFRP1
SKA3
XRCC2
MCM4
BIRC5
H4C14
DHFR
H2BC18
ITGAM
MUC8
IFI44L
CDCA2
LINC02773
SHCBP1
PIGW
CDC20
ANKRD2
H4C8
RAD51AP1
KIF4A
HMGN2P17
BCYRN1P1
ESPL1
BCYRN1
KRTAP5-AS1
CCNA2
KIF7
SPC25
C21orf58
CDCA5
PIF1
H4C9
CDCA3
LOC105378751
NCAPD2P1
LINC02321
FOXM1
NCAPG
H2BC11
GTSE1
UPK3B
H2AC4
H1-1
H2AC12
ZWINT
MYBL2
DSCC1
H2AC13
CCNE2
H2BC14
SKA1
OAS2
LOC107985297
CDC45
LOC643201
NCAPH
RRM2
SPC24
H1-5
LOC728688
LOC101928336
DDIAS
UHRF1
E2F2
H2AC14
GDAP1
ERCC6L
H3C14
H3C15
LOC105372370
E2F8
GINS2
PKMYT1
KBTBD8
E2F7
SLFN12
MCM10
H3C12
LOC100507336
DPF1
EXO1
EDN2
H2AC16
CLSPN
DHRS2
XAF1
LOC105370363
IFNL2
IFNL3
LINC01647
IFNL1
LINC00654
LINC02757
IRGM
IFNB1
DKK1
LSAMP
WDR72
DUSP27
GPC3
UNC93A
SCGB1D2
TMEM252
RPL34P16
PLCXD3
EEF1A1P10
EEF1A1P16
VIM
RPS3AP44
RPL7P47
EEF1A1P19
EEF1A1P7
EEF1A1P11
KRT18P28
ALDH1A1
CMTM7
ITGA4
HNRNPA1P39
EEF1A1P8
PNOC
RPLP0P10
EEF1A1
HSP90B3P
EEF1A1P13
EEF1A1P24
SHISA3
SERINC5
FAM181B
EEF1A1P5
YBX1P6
EEF1A1P12
PLXNA4
EEF1A1P9
RPL19P16
NNT
SERPINF1
PROS1
EEF1A1P6
ANXA1
NTS
RPL3P4
MMP1
KIT
LINC01116
BFSP1
PSAT1P3
EEF1A1P22
RPL7P15
EEF1A1P35
RPL3
ANXA2P3
CRYM
EFR3B
EEF1A1P25
HTRA1
CCN3
RPL3P7
RPL5P17
RPS4X
MRPS6
WLS
CLTRN
COL17A1
EEF1A1P4
GPRIN3
RPL34P34
CTNNBIP1
RPS25P6
RAB3B
RPS3AP49
RPL15P22
RPL29P33
PSAP
LOC388780
RPS3AP34
RPL4P3
RPS26P32
ACSM3
RPS3AP6
TMEM252-DT
RPS25P2
EPCAM
HIPK4
FRG2
ARC
FRG2B
SCRT1
ACAN
KCNB1
TRPM5
HLA-DOA
EVPL
LILRB3
TRIM72
LOC107987441
LOC112268334
LOC112268336
LOC112268337
LOC112268340
COL20A1
XIRP1
MIR9-1HG
PCDH17
USP17L2
GBP1
ATP1B2
LOC105371634
FCGR1A
TLR9
DNAH2
SLC44A4
IFI27
LOC102725035
LOC105377806
KCNJ6
OASL
LOC100128770
WFIKKN2
MUC22
CABP4
CPNE9
LARP1P1
IFI16
USP17L1
CCDC187
RPLP0P3
RFPL4A
SLC15A3
CLCNKA
LOC102723961
LOC107987425
LOC107987462
PLVAP
PERM1
LILRA6
PCDH10
LOC105374986
MX2
OAS1
RFPL4AL1
RAB44
DKFZP434A062
RSAD2
GPR61
SAMD9L
MIR7-3HG
LOC105372711
RBBP8NL
LOC100996662
FAP
IL12RB1
LOC729966
MUC5AC
FAM83F
CACNA1I
IQCN
ATCAY
ELOA3C
TTLL8
LOC105375038
LINC02689
ELOA3D
ELOA3
ELOA3B
ARHGAP9
LY9
SPINK8
STC2
CNGB1
CBSL
CBS
LINC02806
SCARNA5
SNORA53
GUCY1A2
SNORA74B
LOC105370408
SLC7A11
CHAC1
PSAT1
RNR1
MTRNR2L6
ADM2
ULBP1
MLC1
ALDH1L2
RPL3L
MTHFD2
SNORA74A
LOC107987294
RNVU1-7
RNVU1-18
RNU1-3
RNU1-1
LOC105379524
VLDLR-AS1
RNU1-4
RNU1-2
FMO1
SUCNR1
PCK2
PHGDH
LINC00365
LOC107987293
SNORD17
MTRNR2L1
ISCA1P4
RNR2
MTRNR2L8
SEC22B4P
MTRNR2L2
SLC7A5
SCARNA6
LUCAT1
SPRR2E
TLL2
SNORD3C
TRIB3
NMRAL2P
LRRC31
SNORD3A
ISLR
RHCG
BEND6
EIF4EBP1
SNORA23
SNORD3B-1
INSYN1
SCARNA10
GARS1
ATF4P3
RPL10P9
RPS15AP33
FTLP3
LOC107984334
SNORD3B-2
SNORA68
AARS1
HRK
PYCR1
ATF4
SNORD3D
C1R
ARHGAP20
SPRR2A
FLJ46906
RETREG1
S100A8
LOC101927136
FTL
MARS1
TARS1
SLCO5A1
HSD17B2
ASS1P7
YARS1
SLIT3
BCAT1
SLC3A2
ATF4P4
SLC1A5
H3C8
NCF1C
TMCC2-AS1
DYNC1I1
LOC105369626
LOC107987361
LOC101929294
LINC02646
LOC107984817
KRT89P
LINC02878
PTPRD
LOC102723765
MKI67
SNX32
AURKB
CDC6
CCDC188
LOC105371271
DIO3OS
CCDC178
LOC105378526
CAMK4
ITGA11
CENPA
LOC107986709
LOC101929738
PLA2G3
LOC101927345
SNORD143
LOC221946
LOC105375384
BPIFB4
LOC112268440
ZNF730
RPS2P50
SYN1
CEND1
LOC112268130
PILRA
LOC105371891
FAM238C
GRTP1-AS1
LOC105371344
ANXA10
LOC107986986
LINC02826
CD52
LRRN2
LINC00707
LINC00941
LOC107986675
LOC107984104
LOC107987290
SLA2
RPL13AP11
CXCL11
POM121L9P
RPL17P15
LERFS
CSF2
RPS14P2
LOC105369517
CXCL10
LOC105378118
LOC105378609
C5orf46
KRT24
ZFY
PSPHP1
ARSLP1
NLGN4Y
ZBP1
GYG2P1
LOC107985558
FAM8A4P
LOC105377223
TTTY14
DDX3Y
HLA-DRB5
TMSB4Y
LINC00278
UTY
TBL1Y
KDM5D
TTTY15
USP9Y
RPS4Y1
TXLNGY
EIF1AY
MIR3648-2
KRT8P13
RPL35AP36
SLC32A1
SNORD55
LOC105377137
MMP12
C1orf141
FN1
MTHFS
PDF
LLPH-DT
AMTN
SAG
LOC102724737
TPGS1
LOC102723573
RPS10P22
RPS27P7
LRRC26
SPRR2D
LY6D
H3P44
LTF
RN7SL128P
SNORD94
RPS3P5
SNORD10
LINC02228
C4orf48
LKAAEAR1
RPL13AP18
ST13P1
MIR12136
ZNRD2-AS1
TGFBR3L
EEF1DP3
DYNLL1P2
RNA45SN5
LOC107985449
MMP9
LOC112268313
RNA45SN3
LOC101929749
FAM171A2
PGM5P4-AS1
RNA45SN4
C5orf66-AS1
RNA45SN1
GJC2
RPS15P2
RNA45SN2
SNORA63
LINC01002
HLA-H
RNF224
HBB
ENTPD8
SCGB3A1
ATP5F1CP1
LOC105372480
RPS12P29
RPS27P13
GNG11
LOC105372253
RAB43
LOC105370109
PPP4R1-AS1
ENDOG
TMEM121
RPS19P3
NME3
S100A9
SCARNA2
LGALS7
SNORA71A
GP9
RPL15P14
RNF225
LOC102725228
LOC727947
LOC105375711
LGALS7B
EEF1A1P43
LOC105373802
PTGS2
NR1D1
LOC105379173
SNORD116-18
RNU5D-1
LOC102724727
PP2D1
LOC101928373
SLAMF8
EGR2
LOC102723331
LOC107986127
LOC107984261
LOC101928556
LOC101929894
HDAC9
LOC112268067
IFIT2
FGF7P4
ANOS2P
LOC107986166
LOC105374942
LOC112267916
HERC5
SRPX
IFIT3
SEPTIN7P3
AK5
IFI6
SAPCD1-AS1
LOC105370113
CMPK2
MUC19
RPS3AP15
LINC02288
LOC105375721
IFIT1
FGF7P7
LOC102724621
CDC27P10
CDC27P9
HSPA6
LOC105375181
ANKRD1
CDC27P11
LOC105372945
THSD7A
LOC107987393
LOC105378890
SIGLEC11
RGS1
FAM224B
FAM224A
ITGA3
INHBA
VGF
ITGB3
CDKN1A
CLDN4
IGDCC4
SULF2
CDH16
FGFR1
RPS20P26
RPL23AP18
RPS2P48
TBX18
AZIN2
EEF1A2
CD109
NXN
RPS15AP38
S100A1
STK32A
ATP6V0A4
ACSL1
PAX8
RPSAP29
AKT3
RELN
SEMA3F
CRIP2
SPINT2
ENO3
RPS2P17
S100A2
CDC42EP3
TNXB
RHPN1
JPH3
RNF130
LTBP4
ABR
COL7A1
COL4A1
BEX1
CTBP2
LAYN
SLC47A2
FDPSP1
NUDCP2
SLC17A3
FBN1
CTSL
CRIP1
SLC38A5
ARL4C
PFKP
LYRM9
RPS15AP24
HYAL1
SCDP1
LRATD2
FABP3
NDUFS5P7
ABTB2
CLDN2
MFAP3L
BDH2P1
PDGFA
GPNMB
RPS14P3
TRPM3
RPL19P12
TESC
GPR153
MYEF2
BBC3
LIF
MAPT
AKR7L
TANC2
SEMA6A
RPS29P18
TMIGD3
GRIK2
SLC3A1
HLA-B
SCIN
RPS15AP11
AKAP12
RPS19P1
FUZ
SVEP1
SCN2A
VPS35L
MSNP1
EMX1
SLCO2A1
TRNC
B3GALNT1
ZNF816
CLEC2L
LINC02542
GPX7
LINC01446
LINC02506
DGAT2
LOC105379499
CDKN2A
UCHL1
FOXA2
GGH
GPR157
LAGE3
MAGEB1
SLCO1A2
GC
UGT2B4
SMIM10
UGT2A3
LOC107984449
GLTPD2
LOC107986558
LINC01224
TF
APOA1
DSG3
A2M
GABRE
LINC01419
GALNT5
LINC01608
LOC441666
RBP4
GSTA1
FOCAD
LINC02432
NAAA
PLAC8
MAGEA10
DMRTA1
LOC112268449
ITIH2
ZIC1
SULT2A1
ZNF841
LIN28B
CNTNAP4
CHST13
ACMSD
SYT2
CRISPLD1
PLA2G12B
ZNF813
ZFP30
PON1
MAOB
TRI-AAT2-1
SOAT2
TRIM74
FOXA3
CCR6
DUXAP8
LINC00857
FGG
ZNF69
AVPR1A
TTR
LSP1P4
ZNF788P
ZNF681
FAM111B
DCAF4L2
LINC02864
SLC30A10
MASP1
APOC3
FGA
LINC00261
CSTF2T
LOC389831
CDKN2B
DUXAP9
KLHL9
LOC102724219
LOC102723360
LOC102724951
ZIC4
MAGEA3
LOC102724843
LOC107985911
HNF4A
ZNF724
LOC102724701
IL32
HSPB8
RPL12P35
RPS17P16
HMGN1P30
ADSS1
NSA2P7
RPS6KA2
MVB12A
ESRRAP1
GPC1
RPSAP55
ACTBP2
RPL6P20
SPNS2
RPS2P29
MYL12BP2
PLAUR
SEMA4D
NAV1
RPL7AP20
SNPH
PLCD3
GPX1P2
LYPD1
HSPB1P1
EEF1DP1
CFAP47
LOC105375519
HMGCS2
ZNF616
F11
CPB2
LOC105370282
BCHE
IPO5P1
NID1
F7
LINC01145
LINC01322
TMTC1
SELENOP
TM4SF5
HPGD
ASAH2
NIPAL2
EPS8L3
SLC7A2
APOB

## Sheet: Individual-GeneLists
Genes (Huh7-24h)			Genes (Huh7-72h)			Genes (NEC-24h)			Genes (NEC-72h)			Genes (IGROV1-24h)			Genes (IGROV1-72h)
ITGA3			INHBA			ARHGAP9			MIR3648-2			IGFN1			DKK1
INHBA			VGF			LY9			SNORD3A			BACH2			LSAMP
VGF			ITGA3			SPINK8			SNORD3B-1			TMEM154			WDR72
ITGB3			RPS20P26			STC2			SNORD3D			PHF24			DUSP27
CDKN1A			CLDN4			CNGB1			KRT8P13			NUPR1			GPC3
CLDN4			IGFBP3			CBSL			SNORD3B-2			NOTUM			UNC93A
IGDCC4			RPS2P48			CBS			RPL35AP36			TRPM8			SCGB1D2
SULF2			ITGB3			LINC02806			SLC32A1			LURAP1L			TMEM252
CDH16			CDC42EP3			SCARNA5			SNORD55			COL13A1			RPL34P16
IGFBP3			FGFR1			SNORA53			LOC105377137			SERPINA3			PLCXD3
FGFR1			RPL23AP18			GUCY1A2			MMP12			IGFBP1			EEF1A1P10
RPS20P26			CDKN1A			SNORA74B			SNORD3C			CRYAB			PRSS35
RPL23AP18			RPSAP29			LOC105370408			C1orf141			ENTPD3			EEF1A1P16
RPS2P48			ACSL1			SLC7A11			FN1			IL21R			HLA-DMB
TBX18			IGDCC4			CHAC1			MTHFS			DIO3			LHFPL3-AS2
AZIN2			RPS2P17			PSAT1P3			PDF			AKR1C2			VIM
EEF1A2			SULF2			PSAT1			LLPH-DT			INHBE			RPS3AP44
CD109			S100A2			RNR1			AMTN			AKR1C1			RPL7P47
NXN			S100A1			MTRNR2L6			SAG			UBE2L6			EEF1A1P19
ADGRG1			ARL4C			ADM2			LOC102724737			CEACAM1			EEF1A1P7
RPS15AP38			STK32A			ULBP1			RPS3AP49			TUBAL3			EEF1A1P11
S100A1			RHPN1			MLC1			TPGS1			SH2D3C			KRT18P28
STK32A			RPS15AP38			ALDH1L2			LOC102723573			S100P			ALDH1A1
ATP6V0A4			EEF1A2			RPL3L			SNORA23			PDK4			CMTM7
ACSL1			PAX8			MTHFD2			RPS10P22			LOC400499			ITGA4
PAX8			RPS19P1			SNORA74A			RPS27P7			SIPA1L2			HNRNPA1P39
RPSAP29			CDH16			LOC107987294			LRRC26			LCN2			EEF1A1P8
AKT3			ENO3			RNVU1-7			SPRR2D			CSF3R			PNOC
RELN			ABR			RNVU1-18			LY6D			AKR1C3			SPP1
SEMA3F			PDGFA			RNU1-3			H3P44			HLA-DMA			RPLP0P10
CRIP2			ABTB2			RNU1-1			LTF			PRSS35			EEF1A1
SPINT2			ADGRG1			LOC105379524			RN7SL128P			PLPPR3			HSP90B3P
ENO3			SPINT2			VLDLR-AS1			SPRR2E			THSD4			EEF1A1P13
RPS2P17			COL4A1			RNU1-4			SNORD94			HMOX1			EEF1A1P24
S100A2			ATP6V0A4			RNU1-2			RPS3P5			DOK5			S100P
CDC42EP3			TNXB			FMO1			SNORD10			GPHA2			SHISA3
TNXB			AKR7L			SUCNR1			RHCG			FEZ1			TRPM8
RHPN1			JPH3			PCK2			LINC02228			AK7			SERINC5
JPH3			CLDN2			PHGDH			C4orf48			OTOF			FAM181B
RNF130			NUDCP2			LINC00365			LKAAEAR1			ABLIM3			EEF1A1P5
LTBP4			RPS14P3			LOC107987293			RPL13AP18			TCP11L2			YBX1P6
ABR			CRIP2			SNORD17			SPRR2A			DOC2B			EEF1A1P12
COL7A1			PFKP			MTRNR2L1			ST13P1			KLHDC7B			PLXNA4
COL4A1			BEX1			ISCA1P4			MIR12136			UNC5B			EEF1A1P9
BEX1			CTSL			RNR2			ZNRD2-AS1			WIPI1			RPL19P16
CTBP2			RPL12P35			MTRNR2L8			TGFBR3L			LINC00598			NNT
LAYN			RPS15AP11			SEC22B4P			EEF1DP3			LINC00514			SERPINF1
SLC47A2			AZIN2			MTRNR2L2			DYNLL1P2			COL25A1			PROS1
FDPSP1			CD109			SLC7A5			RNA45SN5			IL6			EEF1A1P6
NUDCP2			RELN			SCARNA6			SCARNA6			HLA-DMB			ANXA1
SLC17A3			HLA-B			LUCAT1			LOC107985449			C1S			NTS
FBN1			RPS17P16			CRYAB			MMP9			MEIS3			RPL3P4
CTSL			HMGN1P30			SPRR2E			COL8A2			SAA2			MMP1
CRIP1			TBX18			TLL2			LOC112268313			LHFPL3-AS2			KIT
SLC38A5			COL7A1			SNORD3C			RNA45SN3			CYRIA			LINC01116
ARL4C			SLC47A2			TRIB3			S100A8			TUNAR			BFSP1
PFKP			HYAL1			NMRAL2P			LOC101929749			IL23A			PSAT1P3
LYRM9			NXN			LRRC31			FAM171A2			PRSS8			EEF1A1P22
RPS15AP24			ADSS1			SNORD3A			PGM5P4-AS1			NPR3			RPL7P15
HYAL1			NDUFS5P7			ISLR			RNA45SN4			LOC101929613			EEF1A1P35
SCDP1			SEMA3F			RHCG			C5orf66-AS1			IL1A			CEACAM1
LRATD2			CRIP1			BEND6			RNA45SN1			TSC22D3			RPL3
FABP3			SLC38A5			EIF4EBP1			GJC2			FAM182B			ANXA2P3
NDUFS5P7			NSA2P7			SNORA23			RPS15P2			CLIP2			CRYM
ABTB2			LTBP4			SNORD3B-1			RNA45SN2			SLPI			EFR3B
CLDN2			RPS6KA2			INSYN1			SNORA63			KLRD1			SIPA1L2
MFAP3L			CTBP2			SCARNA10			LINC01002			NALCN			EEF1A1P25
BDH2P1			RNF130			GARS1			HLA-H			PNPLA3			HTRA1
PDGFA			BDH2P1			ATF4P3			SNORA68			LCNL1			CCN3
GPNMB			MVB12A			NUPR1			RNF224			LOC105374584			RPL3P7
RPS14P3			RPS29P18			RPL10P9			HBB			SCART1			RPL5P17
TRPM3			RPS15AP24			RPS15AP33			ENTPD8			FAM182A			RPS4X
RPL19P12			ESRRAP1			FTLP3			SCGB3A1			GLDN			MRPS6
TESC			GPC1			LOC107984334			ATP5F1CP1			LOC100420587			WLS
GPR153			RPSAP55			SNORD3B-2			LOC105372480			SGSM1			CLTRN
MYEF2			ACTBP2			SNORA68			RPS12P29			TRAPPC6A			SH3GL3
BBC3			SVEP1			AARS1			SERPINA3			SPP1			COL17A1
LIF			RPL3P7			HRK			RPS27P13			PPP1R32			CLGN
MAPT			VPS35L			PYCR1			GNG11			GCNT3			EEF1A1P4
AKR7L			LRATD2			ATF4			LOC105372253			CLGN			NALCN
TANC2			RPL19P12			SNORD3D			RAB43			SH3GL3			GPRIN3
SEMA6A			GPNMB			C1R			LOC105370109			LCP1			RPL34P34
RPS29P18			RPL6P20			ARHGAP20			PPP4R1-AS1			ACSS2			CTNNBIP1
TMIGD3			SEMA6A			SPRR2A			ENDOG			MAP1B			RPS25P6
GRIK2			LAYN			FLJ46906			TMEM121			SERPINA5			RAB3B
SLC3A1			SPNS2			RETREG1			RPS19P3			CTH			CFI
HLA-B			RPS2P29			S100A8			NME3			NRTN			RPS3AP49
SCIN			MYL12BP2			LOC101927136			S100A9			CFI			RPL15P22
RPS15AP11			PLAUR			FTL			ANXA2P3			DMBT1			RPL29P33
AKAP12			MFAP3L			MARS1			SCARNA2			SLC6A12			PSAP
RPS19P1			SEMA4D			TARS1			LGALS7			ADAM5			LOC388780
FUZ			NAV1			SLCO5A1			SNORA71A			TLR5			CTH
SVEP1			RPL7AP20			HSD17B2			GP9			IGFBP3			RPS3AP34
SCN2A			SNPH			ASS1P7			RPL15P14			COL8A2			RPL4P3
VPS35L			PLCD3			YARS1			RNF225			CD69			RPS26P32
HLA-DMB			GPX1P2			SLIT3			LOC102725228			TMEM159			ACSM3
RPL3P7			LYPD1			BCAT1			LOC727947			MPZL2			RPS3AP6
MSNP1			HSPB1P1			SLC3A2			LOC105375711			ANKRD33			TMEM252-DT
EMX1			LIF			ATF4P4			LGALS7B			ADGRG1			RPS25P2
SLCO2A1			EEF1DP1			SLC1A5			EEF1A1P43			UBXN10			EPCAM
TRNC			CFAP47			H3C8			LOC105373802			H2BS1			HIPK4
B3GALNT1			CDKN2A			NCF1C			IFI44			IFI44			FRG2
ZNF816			LOC105375519			GTSE1			PTGS2			PSMC3IP			ARC
CLEC2L			APOA1			TMCC2-AS1			NR1D1			HPDL			FRG2B
LINC02542			TRI-AAT2-1			DYNC1I1			LOC105379173			KIF18B			LOC100507336
GPX7			ZFP30			LOC105369626			SNORD116-18			DHFRP1			SCRT1
LINC01446			HMGCS2			CCNA2			RNU5D-1			SKA3			ACAN
LINC02506			GLTPD2			LOC107987361			LOC102724727			XRCC2			KCNB1
DGAT2			LINC00857			LOC101929294			PP2D1			MCM4			TRPM5
LOC105379499			LOC107986558			LINC02646			LOC101928373			BIRC5			HLA-DOA
CDKN2A			ZNF616			LOC107984817			SLAMF8			H4C14			EVPL
UCHL1			GPR157			KRT89P			EGR2			DHFR			LILRB3
FOXA2			F11			LINC02878			LOC102723331			H2BC18			TRIM72
GGH			CPB2			PTPRD			LOC107986127			ITGAM			LOC107987441
GPR157			LOC105370282			LOC102723765			LOC112268130			MUC8			LOC112268334
LAGE3			BCHE			MKI67			LOC107984261			IFI44L			LOC112268336
MAGEB1			AVPR1A			SNX32			LOC101928556			CDCA2			LOC112268337
SLCO1A2			IPO5P1			AURKB			LOC101929894			LINC02773			LOC112268340
GC			FGG			CDC6			HDAC9			SHCBP1			COL20A1
UGT2B4			NID1			CCDC188			LOC112268067			PIGW			XIRP1
SMIM10			F7			LOC105371271			IFIT2			CDC20			MIR9-1HG
UGT2A3			LOC441666			DIO3OS			FGF7P4			ANKRD2			PCDH17
LOC107984449			LINC01145			CCDC178			ANOS2P			H4C8			USP17L2
GLTPD2			RBP4			LOC105378526			LOC107986166			RAD51AP1			GBP1
LOC107986558			LINC01322			CAMK4			LOC105374942			KIF4A			ATP1B2
LINC01224			CHST13			ITGA11			LOC112267916			HMGN2P17			LOC105371634
TF			ZIC1			CENPA			ZNF730			BCYRN1P1			FCGR1A
APOA1			ZNF788P			H2BC14			HERC5			ESPL1			TLR9
DSG3			TMTC1			LOC107986709			SRPX			BCYRN1			DNAH2
A2M			SELENOP			LOC101929738			LOC101927345			KRTAP5-AS1			SLC44A4
GABRE			TM4SF5			SHCBP1			WDR72			CCNA2			IFI27
LINC01419			ZNF813			PLA2G3			PTPRD			KIF7			LOC102725035
GALNT5			HPGD			MCM10			IFIT3			SPC25			LOC105377806
LINC01608			LINC02542			LOC101927345			LOC105371344			C21orf58			KCNJ6
LOC441666			TF			SNORD143			SEPTIN7P3			CDCA5			OASL
RBP4			PLA2G12B			LOC221946			AK5			PIF1			LOC100128770
GSTA1			LINC02432			LOC105375384			IFI6			H4C9			WFIKKN2
FOCAD			TRNC			IFI44L			SAPCD1-AS1			CDCA3			MUC22
LINC02432			ASAH2			BPIFB4			LOC105370113			LOC105378751			CABP4
NAAA			NIPAL2			LOC112268440			DYNC1I1			NCAPD2P1			CPNE9
PLAC8			EPS8L3			ZNF730			CMPK2			LINC02321			LARP1P1
MAGEA10			GABRE			RPS2P50			MUC19			FOXM1			IFI16
DMRTA1			ZNF841			SYN1			LOC107987294			NCAPG			SLFN12
LOC112268449			LIN28B			CEND1			LINC02826			H2BC11			USP17L1
ITIH2			LINC01608			LOC112268130			LOC107987293			GTSE1			CCDC187
ZIC1			LINC02506			PILRA			MX2			UPK3B			RPLP0P3
SULT2A1			LSP1P4			LOC105371891			SNORD143			H2AC4			RFPL4A
ZNF841			DMRTA1			FAM238C			RPS3AP15			H1-1			SLC15A3
LIN28B			NAAA			SPC25			LOC107986986			H2AC12			CLCNKA
CNTNAP4			FGA			GRTP1-AS1			LINC02288			ZWINT			LOC102723961
CHST13			FOXA3			LOC105371344			LOC105375721			MYBL2			LOC107987425
ACMSD			SLCO1A2			ANXA10			LINC02646			DSCC1			LOC107987462
SYT2			CSTF2T			LOC107986986			IFIT1			H2AC13			PLVAP
CRISPLD1			LOC112268449			LINC02826			FGF7P7			CCNE2			PERM1
PLA2G12B			SLC7A2			CD52			RSAD2			H2BC14			LILRA6
ZNF813			ITIH2			LRRN2			BACH2			SKA1			PCDH10
ZFP30			APOB			MYBL2			LOC102724621			OAS2			LOC105374986
PON1			LINC01419			LINC00707			CDC27P10			LOC107985297			MX2
MAOB			MAOB			LINC00941			CDC27P9			CDC45			OAS1
TRI-AAT2-1			SYT2			LOC107986675			RPL17P15			LOC643201			RFPL4AL1
SOAT2			APOC3			PKMYT1			LOC105369517			NCAPH			RAB44
MX2			ZNF69			LOC107984104			LOC107987290			RRM2			DKFZP434A062
TRIM74			MX2			LOC107987290			HSPA6			SPC24			RSAD2
FOXA3			ZNF681			OASL			LOC105375181			H1-5			GPR61
CCR6			GALNT5			SLA2			ANKRD1			LOC728688			LOC105372370
DUXAP8			DUXAP8			RPL13AP11			CDC27P11			LOC101928336			SAMD9L
LINC00857			A2M			CXCL11			LOC105372945			DDIAS			MIR7-3HG
FGG			SOAT2			POM121L9P			CXCL11			UHRF1			KRTAP5-AS1
ZNF69			PLAC8			RPL17P15			IL6			E2F2			LOC105372711
AVPR1A			FOCAD			LERFS			THSD7A			H2AC14			LINC00654
TTR			MAGEA3			CSF2			LERFS			GDAP1			RBBP8NL
LSP1P4			DCAF4L2			RPS14P2			LOC107987393			ERCC6L			LOC100996662
ZNF788P			TTR			LOC105369517			LOC105378890			H3C14			LINC02773
ZNF681			CNTNAP4			CXCL10			SIGLEC11			H3C15			FAP
FAM111B			DSG3			LOC105378118			CXCL10			LOC105372370			IL12RB1
DCAF4L2			ACMSD			LOC105378609			IFI44L			E2F8			LOC729966
LINC02864			TRIM74			C5orf46			OASL			GINS2			MUC5AC
SLC30A10			LOC102724219			KRT24			LOC107985558			PKMYT1			FAM83F
MASP1			LOC102723360			ZFY			ZFY			KBTBD8			LINC02757
APOC3			LOC102724951			PSPHP1			PSPHP1			E2F7			CACNA1I
FGA			LOC389831			ARSLP1			ARSLP1			SLFN12			LOC105378751
LINC00261			KLHL9			NLGN4Y			RGS1			MCM10			LINC01647
CSTF2T			LINC00261			ZBP1			FAM224B			H3C12			IFI44
LOC389831			CCR6			GYG2P1			FAM224A			LOC100507336			IQCN
CDKN2B			ZNF724			LOC107985558			NLGN4Y			DPF1			ATCAY
DUXAP9			LINC02864			FAM8A4P			LOC105377223			EXO1			ELOA3C
KLHL9			ZIC4			LOC105377223			ZBP1			EDN2			TTLL8
LOC102724219			SLC30A10			TTTY14			TTTY14			H2AC16			IFNL1
LOC102723360			IL32			DDX3Y			DDX3Y			CLSPN			IRGM
LOC102724951			PON1			HLA-DRB5			LINC00278			DHRS2			LOC105375038
ZIC4			LOC102724843			TMSB4Y			HLA-DRB5			XAF1			LINC02689
MAGEA3			LOC107985911			LINC00278			TMSB4Y			LOC105370363			OAS2
LOC102724843			LOC102724701			UTY			UTY			IFNL2			IFI44L
LOC107985911			HNF4A			TBL1Y			TBL1Y			IFNL3			IFNL2
HNF4A			DUXAP9			KDM5D			KDM5D			LINC01647			IFNL3
ZNF724			HSPB8			TTTY15			TTTY15			IFNL1			XAF1
LOC102724701			SULT2A1			USP9Y			RPS4Y1			LINC00654			ELOA3D
PCDH17			CDKN2B			RPS4Y1			USP9Y			LINC02757			ELOA3
IL32			PCDH17			TXLNGY			TXLNGY			IRGM			ELOA3B
HSPB8			MASP1			EIF1AY			EIF1AY			IFNB1			IFNB1
