# Supplementary material for: Betacoronaviruses SARS-CoV-2 and HCoV-OC43 infections in IGROV-1 cell line require aryl hydrocarbon receptor
Source: Emerg Microbes Infect. 2023 Sep 6;12(2):2256416. doi: 10.1080/22221751.2023.2256416 (PMC10512916; doi:10.1080/22221751.2023.2256416)
Supplement: Supplemental Material [file TEMI_A_2256416_SM8734.xlsx]

## Sheet: Legend
Supplementary Table 4
Gene summary files from MAGeCK analysis, for genetic screening of SARS-CoV-2 and HCoV-OC43 host factors in IGROV-1 cells
	id	Offical gene symbol of protein
	num	The number of targeting sgRNA for each gene
	neg|score	The RRA lo value of this gene in negative selection
	neg|p-value	The raw p-value (using permutation) of this gene in negative selection
	neg|fdr	The false discovery rate of this gene in negative selection
	neg|rank	The ranking of this gene in negative selection
	neg|goodsgrna	The number of "good" sgRNAs, i.e. sgRNA whose ranking is below the alpha cutoff, in negative selection
	neg|lfc	The log fold change of the magnitude of enrichment for this gene, in negative selection
	pos|score	The RRA lo value of this gene in negative selection
	pos|p-value	The raw p-value of this gene in positive selection
	pos|fdr	The false discovery rate of this gene in positive selection
	pos|rank	The ranking of this gene in positive selection
	pos|goodsgrna	The number of "good" sgRNAs, i.e. sgRNA whose ranking is below the alpha cutoff, in postive selection
	pos|lfc	The log fold change of the magnitude of enrichment for this gene, in positive selection

## Sheet: SARS-CoV-2
id	num	neg|score	neg|p-value	neg|fdr	neg|rank	neg|goodsgrna	neg|lfc	pos|score	pos|p-value	pos|fdr	pos|rank	pos|goodsgrna	pos|lfc
ACE2	4	1	1	1	19108	0	6.0435	1.19e-11	2.59e-07	0.002475	2	4	6.0435
AHR	4	1	1	1	19107	0	2.7313	3.83e-06	1.42e-05	0.090759	3	4	2.7313
CLEC18A	4	0.83832	0.87039	1	16506	1	2.6412	7.8e-06	3.13e-05	0.149752	4	2	2.6412
TNNI1	4	0.68386	0.81068	1	15233	1	0.74554	2.7e-05	0.000107	0.386519	5	2	0.74554
TPRG1L	4	0.417	0.60864	1	11451	2	0.61514	4.51e-05	0.00017436	0.386519	6	2	0.61514
SCAMP2	4	0.99984	0.99984	1	19101	0	3.7348	4.67e-05	0.00018213	0.386519	7	4	3.7348
FAM83F	4	0.99995	0.99995	1	19106	0	3.3427	4.85e-05	0.00018887	0.386519	8	4	3.3427
RWDD1	4	0.99995	0.99994	1	19105	0	2.2156	5.47e-05	0.00021478	0.386519	9	4	2.2156
ZNF579	4	0.99887	0.99885	1	19077	0	3.4572	6.09e-05	0.00024431	0.386519	10	4	3.4572
SMIM6	4	0.78903	0.84859	1	16069	1	3.0002	6.25e-05	0.0002526	0.386519	11	3	3.0002
MAGEB2	3	0.99994	0.99994	1	19104	0	3.6351	6.39e-05	0.0002013	0.386519	12	3	3.6351
MAML1	4	0.99993	0.99993	1	19103	0	4.3022	6.49e-05	0.00026297	0.386519	13	4	4.3022
KDM5C	4	0.91963	0.92138	1	17534	1	-0.89272	8.1e-05	0.0003267	0.413676	14	2	-0.89272
C11orf68	4	0.99991	0.99991	1	19102	0	2.1598	8.65e-05	0.00034173	0.413676	15	4	2.1598
SH2B3	4	0.9076	0.91184	1	17325	1	3.3101	8.82e-05	0.00034639	0.413676	16	3	3.3101
AK2	4	0.9511	0.95115	1	18086	0	2.1552	0.00011309	0.00044432	0.490924	17	2	2.1552
CMTM6	4	0.44255	0.62717	1	11812	2	0.0049976	0.00011804	0.00046246	0.490924	18	2	0.0049976
SEBOX	4	0.97415	0.9743	1	18562	0	-0.22814	0.00013501	0.00053811	0.541167	19	2	-0.22814
CHL1	4	0.91269	0.91571	1	17395	1	1.262	0.000189	0.00071532	0.653701	20	3	1.262
TRIM44	4	0.64699	0.78174	1	14681	1	3.4533	0.00019024	0.00071843	0.653701	21	3	3.4533
LANCL3	4	0.87351	0.88933	1	16907	1	1.3543	0.00022605	0.000849	0.682689	22	2	1.3543
MPG	4	0.15038	0.31346	1	5940	2	-5.2803	0.000243	0.00090704	0.682689	23	1	-5.2803
RPUSD2	4	0.95174	0.95179	1	18093	0	1.8469	0.00024518	0.00091377	0.682689	24	2	1.8469
TNFSF13	4	0.9873	0.98725	1	18830	0	3.2535	0.00025354	0.00094745	0.682689	25	3	3.2535
TAF9	4	0.41263	0.6055	1	11393	1	2.5294	0.00026082	0.00097129	0.682689	26	2	2.5294
YIF1B	4	0.99974	0.99974	1	19100	0	2.2155	0.00026337	0.00098113	0.682689	27	4	2.2155
FLVCR2	4	0.99973	0.99973	1	19099	0	2.2472	0.00027344	0.0010164	0.682689	28	4	2.2472
FXR1	4	0.85895	0.88094	1	16728	1	3.2632	0.00028795	0.0010651	0.682689	29	3	3.2632
SRA1	4	0.10473	0.24371	0.977779	4690	1	-2.1054	0.000297	0.0010993	0.682689	30	1	-2.1054
SLFN14	4	0.59424	0.7409	1	13950	2	-0.14103	0.00030031	0.0011076	0.682689	31	2	-0.14103
RBM25	4	0.27747	0.48918	1	9091	1	-0.81022	0.00035099	0.0012858	0.688472	32	2	-0.81022
JAKMIP2	4	0.99964	0.99964	1	19098	0	2.4777	0.00035833	0.0013112	0.688472	33	4	2.4777
CES5A	4	0.0071634	0.024424	0.836495	548	1	3.1574	0.00036285	0.001333	0.688472	34	3	3.1574
SLC2A13	4	0.37005	0.57467	1	10748	2	-0.35491	0.00037099	0.0013692	0.688472	35	2	-0.35491
ALDH1A3	4	0.9996	0.9996	1	19097	0	1.6129	0.00039647	0.0014537	0.688472	36	4	1.6129
AUNIP	4	0.3438	0.55589	1	10367	2	-4.6899	0.00040498	0.0014822	0.688472	37	1	-4.6899
AMMECR1	4	0.97367	0.97382	1	18550	0	2.9589	0.00040832	0.0014977	0.688472	38	3	2.9589
TRADD	4	0.98788	0.98789	1	18842	0	3.4673	0.00041283	0.0015133	0.688472	39	3	3.4673
HEPACAM2	4	0.60682	0.75062	1	14154	1	3.8491	0.00043029	0.0015724	0.698711	40	3	3.8491
JTB	4	0.90504	0.90995	1	17292	1	2.8197	0.00044346	0.0016221	0.70036	41	3	2.8197
FAM104A	4	0.9102	0.91381	1	17375	1	-0.95252	0.00045896	0.0016853	0.70036	42	2	-0.95252
SPC24	3	0.99954	0.99954	1	19096	0	3.8893	0.00045926	0.0013542	0.688472	43	3	3.8893
GREB1	4	0.6341	0.7717	1	14509	1	1.592	0.00047433	0.0017444	0.70036	44	2	1.592
ZNF160	4	0.99952	0.99952	1	19095	0	1.3633	0.00047901	0.0017599	0.70036	45	4	1.3633
SLC25A21	4	0.99952	0.99952	1	19094	0	1.6569	0.0004827	0.001776	0.70036	46	4	1.6569
SAT1	4	0.81412	0.85911	1	16265	1	0.43216	0.00050469	0.0018496	0.70036	47	2	0.43216
TRIM47	4	0.99948	0.99948	1	19093	0	1.43	0.00052397	0.0019221	0.70036	48	4	1.43
ICMT	4	0.33972	0.55299	1	10306	2	-1.9693	0.00053994	0.001977	0.70036	49	2	-1.9693
NUP85	4	0.61669	0.75826	1	14279	2	-0.1593	0.00053994	0.001977	0.70036	50	2	-0.1593
ALKBH6	4	0.58138	0.73101	1	13775	1	3.0941	0.00054258	0.0019822	0.70036	51	3	3.0941
VWC2	4	0.99945	0.99946	1	19092	0	2.1879	0.00054687	0.0019988	0.70036	52	4	2.1879
NDUFB3	4	0.99945	0.99946	1	19091	0	2.1846	0.00055152	0.0020159	0.70036	53	4	2.1846
SERPINA9	4	0.99943	0.99944	1	19090	0	1.4719	0.00056922	0.0020967	0.715435	54	4	1.4719
GSTT2B	4	0.99624	0.99625	1	19018	0	2.6746	0.00060206	0.0022009	0.727808	55	3	2.6746
PAK2	4	0.77938	0.84471	1	15965	1	-2.63	0.00062091	0.0022719	0.735778	56	1	-2.63
GRIN1	4	0.36546	0.57138	1	10678	2	-1.8066	0.00067489	0.0024553	0.751511	57	2	-1.8066
CASP14	4	0.43379	0.62083	1	11672	1	2.4684	0.00068175	0.0024905	0.751511	58	3	2.4684
GLTSCR2	2	0.38936	0.46833	1	11067	1	0.56781	0.00068845	0.0013438	0.688472	59	1	0.56781
NOL6	4	0.97069	0.97076	1	18486	0	0.78071	0.00069165	0.0025227	0.751511	60	2	0.78071
C16orf92	4	0.96823	0.96829	1	18426	0	3.1643	0.00069514	0.0025356	0.751511	61	3	3.1643
H1FX	4	0.93099	0.93137	1	17725	1	2.0301	0.00070284	0.0025618	0.751511	62	2	2.0301
WDR60	4	0.99854	0.99851	1	19067	0	3.0358	0.00071392	0.0026102	0.751511	63	4	3.0358
MGC50722	4	0.93099	0.93137	1	17719	1	1.7944	0.00072887	0.0026579	0.751511	64	2	1.7944
MPEG1	4	0.24289	0.44369	1	8281	1	2.5997	0.00075093	0.002732	0.751511	65	3	2.5997
COQ5	4	0.95575	0.9558	1	18189	0	3.448	0.0007548	0.002747	0.751511	66	3	3.448
DDR1	4	0.99924	0.99924	1	19089	0	1.2238	0.00075992	0.0027657	0.751511	67	4	1.2238
OR13J1	3	0.98061	0.98074	1	18688	0	-0.0033756	0.00076938	0.0022092	0.727808	68	1	-0.0033756
SIRT2	4	0.58732	0.73561	1	13852	1	1.5405	0.00078284	0.0028434	0.751511	69	3	1.5405
LOC653602	4	0.99918	0.99918	1	19088	0	1.4577	0.000821	0.0029678	0.751511	70	4	1.4577
NAGS	4	0.11768	0.26392	0.977779	5102	2	-0.97487	0.00082331	0.0029771	0.751511	71	2	-0.97487
PLCXD1	4	0.99918	0.99917	1	19087	0	2.1492	0.00082363	0.0029792	0.751511	72	4	2.1492
ZNF540	4	0.99917	0.99917	1	19086	0	2.35	0.00083021	0.0030035	0.751511	73	4	2.35
ZKSCAN3	4	0.15038	0.31346	1	5925	2	-2.9041	0.00083682	0.0030284	0.751511	74	2	-2.9041
UIMC1	4	0.99913	0.99913	1	19085	0	1.5687	0.00086713	0.003145	0.759839	75	4	1.5687
SLC22A16	4	0.99912	0.99912	1	19084	0	2.6391	0.00086719	0.0031455	0.759839	76	4	2.6391
ENG	4	0.13341	0.28795	0.989499	5505	1	2.792	0.00087628	0.0031812	0.759839	77	3	2.792
CINP	4	0.36066	0.56791	1	10597	2	-4.6583	0.00089079	0.003232	0.762437	78	1	-4.6583
PLCZ1	4	0.44255	0.62717	1	11809	1	2.7705	0.00090568	0.0032735	0.762799	79	3	2.7705
SHH	4	0.99908	0.99907	1	19083	0	1.6237	0.00092401	0.0033455	0.766644	80	4	1.6237
FUT6	4	0.49849	0.66862	1	12655	1	1.5408	0.00093714	0.0033911	0.766644	81	2	1.5408
SIX2	4	0.98172	0.98174	1	18711	0	0.71068	0.00094476	0.0034129	0.766644	82	2	0.71068
DIAPH3	4	0.99904	0.99904	1	19082	0	1.7201	0.00095546	0.0034543	0.766644	83	4	1.7201
ADAD1	4	0.0080225	0.027095	0.839804	608	1	2.5314	0.00097801	0.003531	0.766708	84	3	2.5314
TNFAIP3	4	0.99899	0.99899	1	19081	0	1.2726	0.0010062	0.0036331	0.770932	85	4	1.2726
FAM151A	4	0.33684	0.55092	1	10263	2	-4.5549	0.0010257	0.0037041	0.770932	86	1	-4.5549
GATA4	4	0.99897	0.99896	1	19080	0	2.4036	0.0010283	0.0037118	0.770932	87	4	2.4036
KCNIP2	4	0.9076	0.91184	1	17326	1	0.27258	0.0010709	0.0038844	0.78142	88	2	0.27258
PNCK	4	0.99892	0.99891	1	19079	0	1.7448	0.0010795	0.0039113	0.78142	89	4	1.7448
AZI2	4	0.2082	0.3966	1	7416	1	1.1196	0.0010923	0.0039585	0.78142	90	2	1.1196
EAF2	4	0.9989	0.99888	1	19078	0	1.6909	0.0011025	0.0039968	0.78142	91	4	1.6909
FBN3	4	0.98572	0.98569	1	18797	0	2.6525	0.001105	0.0040056	0.78142	92	3	2.6525
PANK1	4	0.82944	0.86613	1	16408	1	-1.2286	0.0011066	0.0040077	0.78142	93	1	-1.2286
PDHA1	4	0.88895	0.89883	1	17093	1	1.7307	0.0011291	0.0040808	0.786651	94	2	1.7307
EXOG	4	0.20566	0.39299	1	7337	1	-0.81718	0.0011606	0.0041979	0.786651	95	1	-0.81718
HESX1	4	0.50113	0.67062	1	12700	1	1.4348	0.0011798	0.0042611	0.786651	96	2	1.4348
ATAD2	4	0.99879	0.99878	1	19076	0	1.2536	0.0012075	0.0043621	0.786651	97	4	1.2536
OR4D10	4	0.99879	0.99877	1	19075	0	2.1572	0.001214	0.0043813	0.786651	98	4	2.1572
SNX30	4	0.99877	0.99876	1	19074	0	1.7803	0.0012272	0.0044253	0.786651	99	4	1.7803
MBD3L2	3	0.99877	0.99881	1	19073	0	2.1678	0.0012284	0.0034906	0.766644	100	3	2.1678
GSG2	4	0.41828	0.60955	1	11473	2	-1.2391	0.0012415	0.0044746	0.786651	101	2	-1.2391
AGAP3	4	0.86174	0.88252	1	16765	1	1.3185	0.0012415	0.0044746	0.786651	102	2	1.3185
CCDC109B	4	0.99875	0.99873	1	19072	0	1.7189	0.0012535	0.0045103	0.786651	103	4	1.7189
CYR61	4	0.99875	0.99873	1	19071	0	1.5686	0.0012538	0.0045124	0.786651	104	4	1.5686
FHL2	4	0.86464	0.88417	1	16804	1	2.2193	0.0012822	0.0046114	0.786651	105	3	2.2193
ZNF251	4	0.62013	0.76089	1	14315	1	0.079949	0.0012962	0.0046559	0.786651	106	2	0.079949
PAX2	4	0.9883	0.9883	1	18851	0	3.0308	0.0013002	0.0046704	0.786651	107	3	3.0308
DTL	3	0.98738	0.98753	1	18832	0	3.952	0.0013055	0.0036942	0.770932	108	2	3.952
MIEF2	4	0.99869	0.99867	1	19070	0	1.916	0.0013068	0.0046932	0.786651	109	4	1.916
LARP7	4	0.9537	0.95373	1	18148	0	3.0657	0.0013322	0.0047772	0.790329	110	3	3.0657
PPP1R15B	2	0.99476	0.99471	1	18985	0	4.9176	0.0013362	0.0025936	0.751511	111	2	4.9176
EP300	4	0.91963	0.92138	1	17543	1	2.085	0.0013378	0.0047979	0.790329	112	3	2.085
C19orf52	1	0.99866	0.99869	1	19069	0	6.624	0.0013434	0.0013293	0.688472	113	1	6.624
CDCA8	4	0.66221	0.7936	1	14884	2	-1.4287	0.0013764	0.0049274	0.791206	114	1	-1.4287
GNRHR	4	0.19104	0.37246	1	6990	2	-4.3982	0.0013764	0.0049274	0.791206	115	1	-4.3982
HLF	4	0.9986	0.99856	1	19068	0	1.7024	0.0013996	0.0050119	0.796421	116	4	1.7024
SAP30	4	0.60996	0.75303	1	14176	1	2.5801	0.0014207	0.005085	0.796421	117	3	2.5801
RPL8	2	0.91184	0.91171	1	17391	0	2.5635	0.0014711	0.0028662	0.751511	118	1	2.5635
ST18	3	0.11811	0.25443	0.977779	5125	1	3.5439	0.0014777	0.0041564	0.786651	119	2	3.5439
ZNF267	4	0.0032833	0.011601	0.767282	283	3	-7.0687	0.0014843	0.0052943	0.815834	120	1	-7.0687
MX1	4	0.85502	0.87884	1	16674	1	0.5973	0.0015383	0.0054896	0.817857	121	2	0.5973
ARID1B	4	0.99846	0.99844	1	19066	0	1.7221	0.0015389	0.0054922	0.817857	122	4	1.7221
LCE1D	4	0.85027	0.87633	1	16624	1	1.2135	0.0015577	0.0055544	0.817857	123	2	1.2135
RIBC2	4	0.99843	0.99841	1	19065	0	2.3462	0.0015698	0.0056021	0.817857	124	4	2.3462
KRT37	4	0.99843	0.99841	1	19064	0	1.3299	0.0015743	0.0056171	0.817857	125	4	1.3299
MAP7D1	4	0.99842	0.99841	1	19063	0	1.0118	0.0015753	0.0056197	0.817857	126	4	1.0118
PARPBP	4	0.18881	0.36927	1	6931	2	-1.2599	0.0015922	0.0056824	0.817857	127	2	-1.2599
ZNF26	4	0.99839	0.99837	1	19062	0	1.2779	0.0016117	0.005756	0.817857	128	4	1.2779
ERCC4	4	0.28954	0.50467	1	9375	1	2.6904	0.0016261	0.0058109	0.817857	129	3	2.6904
CT47A9	4	0.97741	0.97761	1	18625	0	2.4584	0.0016378	0.0058529	0.817857	130	3	2.4584
MED11	3	0.29579	0.44854	1	9500	1	-1.7681	0.0016395	0.004643	0.786651	131	1	-1.7681
C2orf69	4	0.97069	0.97076	1	18482	0	2.0738	0.0016461	0.0058767	0.817857	132	2	2.0738
LCE1A	4	0.57226	0.72394	1	13678	1	2.5746	0.0016666	0.0059425	0.817857	133	3	2.5746
MESDC1	4	0.73648	0.82905	1	15632	1	2.223	0.0016788	0.0059886	0.817857	134	3	2.223
MRM1	4	0.991	0.991	1	18908	0	2.2943	0.0016801	0.0059923	0.817857	135	3	2.2943
FAM200A	3	0.74885	0.77715	1	15726	1	-4.2962	0.0017204	0.0048632	0.791206	136	1	-4.2962
GTPBP1	4	0.68718	0.81331	1	15288	2	0.75922	0.0017388	0.0061959	0.829749	137	2	0.75922
FAM98B	4	0.91963	0.92138	1	17519	1	-1.261	0.001754	0.0062482	0.829749	138	1	-1.261
AIM2	4	0.76597	0.83959	1	15855	1	2.0853	0.0017712	0.006313	0.829749	139	3	2.0853
ARMCX4	3	0.65323	0.72328	1	14769	1	3.7055	0.0017885	0.0050518	0.796421	140	2	3.7055
SLC26A11	4	0.44834	0.63131	1	11891	1	2.5027	0.0017985	0.0063985	0.829749	141	3	2.5027
SPAG9	4	0.82016	0.8618	1	16312	1	2.3518	0.0017993	0.0064006	0.829749	142	3	2.3518
OPALIN	4	0.62508	0.76476	1	14386	2	-0.66931	0.0018079	0.0064192	0.829749	143	2	-0.66931
C6orf226	4	0.64975	0.7839	1	14723	2	-0.46618	0.0018095	0.0064239	0.829749	144	2	-0.46618
ZDHHC8	4	0.25638	0.46171	1	8604	1	2.466	0.0018167	0.0064374	0.829749	145	3	2.466
FAAH	3	0.33853	0.4927	1	10282	2	-5.141	0.0018418	0.0052047	0.808541	146	1	-5.141
S100A10	4	0.87873	0.89242	1	16944	1	3.1448	0.001849	0.0065317	0.829749	147	3	3.1448
RNF135	4	0.53442	0.69533	1	13136	1	2.6624	0.0018536	0.0065441	0.829749	148	3	2.6624
FAM53A	4	0.98422	0.98421	1	18768	0	2.318	0.0018602	0.006557	0.829749	149	3	2.318
STBD1	3	0.84905	0.85071	1	16609	1	3.8514	0.0019071	0.0053829	0.817857	150	2	3.8514
NDUFS8	4	0.20133	0.38689	1	7229	3	-5.5421	0.0019158	0.0067109	0.843636	151	1	-5.5421
DMRTA2	4	0.9417	0.94178	1	17908	0	-1.2468	0.0020237	0.0069928	0.856057	152	1	-1.2468
PEX3	4	0.88895	0.89883	1	17092	1	2.3052	0.0020242	0.0069941	0.856057	153	3	2.3052
MEAF6	4	0.65336	0.78667	1	14785	1	0.41291	0.0020388	0.0070338	0.856057	154	2	0.41291
FAM181A	4	0.9841	0.98409	1	18761	0	2.5009	0.0020592	0.0070882	0.856343	155	3	2.5009
ST3GAL2	4	0.61945	0.76039	1	14309	2	-3.5805	0.0020776	0.0071343	0.856343	156	1	-3.5805
UBA5	4	0.93961	0.93973	1	17859	0	1.3559	0.0020886	0.0071705	0.856343	157	2	1.3559
METTL4	4	0.26366	0.47139	1	8737	3	-4.4006	0.0021315	0.0072892	0.858881	158	1	-4.4006
ORMDL3	4	0.64699	0.78174	1	14677	1	2.5776	0.0021611	0.0073716	0.858881	159	3	2.5776
OGT	4	0.96883	0.9689	1	18443	0	0.34848	0.0022171	0.0075198	0.863194	160	2	0.34848
PKMYT1	4	0.66221	0.7936	1	14882	2	0.76539	0.0022262	0.0075441	0.863194	161	2	0.76539
HDAC7	4	0.63733	0.77417	1	14572	2	-0.19589	0.0022813	0.0076872	0.86689	162	2	-0.19589
TOR1AIP1	4	0.86174	0.88252	1	16755	1	0.65746	0.0022844	0.0076965	0.86689	163	2	0.65746
VNN1	4	0.16312	0.33236	1	6281	2	-0.31321	0.0022905	0.0077125	0.86689	164	2	-0.31321
ADAMTS16	4	0.98907	0.98907	1	18867	0	2.8388	0.0023416	0.0078499	0.868225	165	3	2.8388
GAGE10	4	0.99484	0.99485	1	18987	0	3.0646	0.0023463	0.0078607	0.868225	166	3	3.0646
CCL19	4	0.98455	0.98454	1	18770	0	0.50339	0.0024011	0.0080022	0.873385	167	2	0.50339
GLB1L2	3	0.99562	0.99574	1	19010	0	3.6343	0.0024278	0.0067767	0.846341	168	3	3.6343
AKR1C3	4	0.55256	0.709	1	13402	2	-0.7666	0.0024281	0.0080675	0.873385	169	2	-0.7666
NOXRED1	4	0.26332	0.47096	1	8729	1	1.6084	0.0024376	0.0080903	0.873385	170	2	1.6084
ZWILCH	3	0.60457	0.69968	1	14101	1	3.335	0.0024459	0.0068379	0.848431	171	2	3.335
C18orf63	4	0.98097	0.98101	1	18695	0	2.7039	0.0024719	0.0081799	0.878101	172	3	2.7039
ACOT1	4	0.041985	0.12392	0.930434	2502	3	-6.1406	0.0025089	0.0082706	0.882875	173	1	-6.1406
USHBP1	4	0.32265	0.54069	1	10044	2	-0.088204	0.0025484	0.0083634	0.887816	174	2	-0.088204
PPARG	4	0.32836	0.54483	1	10138	2	-2.6687	0.0025897	0.0084613	0.888342	175	1	-2.6687
ZNF607	4	0.56594	0.7192	1	13575	1	0.76352	0.0025897	0.0084613	0.888342	176	3	0.76352
XPR1	3	0.82894	0.8337	1	16384	1	-0.67943	0.0026102	0.0072794	0.858881	177	2	-0.67943
TMEM59L	4	0.39252	0.59084	1	11109	2	-0.94368	0.0026154	0.0085338	0.891062	178	2	-0.94368
FAM98C	3	0.99737	0.99741	1	19045	0	3.1299	0.0026275	0.007327	0.858881	179	3	3.1299
HDAC3	3	0.4421	0.5974	1	11786	1	-1.1395	0.0026911	0.0074939	0.863194	180	1	-1.1395
ABLIM3	4	0.18077	0.35783	1	6719	1	1.9569	0.0026995	0.008738	0.900048	181	3	1.9569
LPAR5	4	0.97673	0.97693	1	18617	0	2.0368	0.0027126	0.0087774	0.900048	182	3	2.0368
KIF6	4	0.21045	0.39975	1	7486	3	-5.1009	0.0027245	0.0088022	0.900048	183	1	-5.1009
CLIC1	4	0.072291	0.1915	0.967666	3720	1	1.2647	0.0027619	0.0089079	0.900048	184	2	1.2647
TBX5	4	0.45745	0.63809	1	12032	1	0.0035822	0.0027653	0.0089167	0.900048	185	2	0.0035822
CLLU1	4	0.37348	0.57715	1	10815	1	1.1113	0.0027784	0.0089566	0.900048	186	3	1.1113
KNCN	3	0.68537	0.74003	1	15248	1	-4.0034	0.0028124	0.0078255	0.868225	187	1	-4.0034
SPTBN4	4	0.50399	0.6727	1	12744	2	-2.6279	0.0028592	0.0091826	0.900048	188	2	-2.6279
KCNA7	4	0.091786	0.22341	0.971209	4348	2	-1.5078	0.0028592	0.0091826	0.900048	189	2	-1.5078
NKRF	4	0.81412	0.85911	1	16266	1	2.108	0.0028658	0.0092012	0.900048	190	2	2.108
RPL36	3	0.93856	0.93879	1	17853	0	-2.3814	0.0028932	0.0080602	0.873385	191	1	-2.3814
KRTAP13-1	4	0.29482	0.51133	1	9485	2	0.033195	0.0029193	0.0093344	0.900048	192	2	0.033195
B4GALNT1	4	0.74312	0.83138	1	15686	1	2.8084	0.0029332	0.0093675	0.900048	193	3	2.8084
SLC9A8	4	0.90112	0.9071	1	17249	1	2.33	0.002934	0.0093712	0.900048	194	3	2.33
SOD1	2	0.86867	0.86855	1	16852	0	1.8052	0.0029411	0.0057643	0.817857	195	1	1.8052
ZMYM6NB	4	0.97367	0.97381	1	18549	0	1.1585	0.0029961	0.0095359	0.900048	196	2	1.1585
TEX11	4	0.96774	0.9678	1	18413	0	2.6117	0.0030099	0.0095696	0.900048	197	3	2.6117
PPT1	4	0.58162	0.7312	1	13796	2	-0.32467	0.0030137	0.00958	0.900048	198	2	-0.32467
FDX1	4	0.92664	0.92744	1	17632	1	2.4192	0.0030278	0.0096121	0.900048	199	3	2.4192
BET1	4	0.87351	0.88933	1	16885	1	2.5482	0.0030458	0.009651	0.900048	200	3	2.5482
SAP130	4	0.86464	0.88417	1	16795	1	0.028534	0.0030478	0.0096562	0.900048	201	2	0.028534
CYP4F2	4	0.86747	0.88578	1	16828	1	0.78078	0.0030478	0.0096562	0.900048	202	2	0.78078
HAUS5	4	0.39735	0.59437	1	11172	2	-3.083	0.0030478	0.0096562	0.900048	203	1	-3.083
PPFIBP2	4	0.77633	0.84353	1	15927	1	-0.30517	0.0030863	0.0097422	0.902162	204	2	-0.30517
NPFF	4	0.99408	0.99413	1	18969	0	2.5412	0.0030975	0.0097733	0.902162	205	3	2.5412
TIGD2	4	0.99193	0.99194	1	18923	0	2.1153	0.0031543	0.0099215	0.907504	206	2	2.1153
BGN	4	0.2296	0.42583	1	7921	3	-5.0569	0.0031556	0.0099261	0.907504	207	1	-5.0569
IFIT5	4	0.070233	0.18809	0.965596	3651	3	-5.0619	0.0032094	0.010066	0.911854	208	1	-5.0619
PWWP2A	4	0.15429	0.31928	1	6039	1	2.3708	0.003214	0.010073	0.911854	209	3	2.3708
POLI	4	0.56594	0.7192	1	13583	1	1.9124	0.0032633	0.010203	0.911854	210	3	1.9124
PSMD11	4	0.48638	0.65952	1	12449	2	-0.86956	0.0033127	0.010313	0.911854	211	2	-0.86956
LRRC26	4	0.59429	0.74093	1	13994	1	-0.1161	0.0033172	0.010328	0.911854	212	1	-0.1161
CHRNA1	4	0.97069	0.97076	1	18474	0	2.0823	0.0033365	0.01038	0.911854	213	3	2.0823
USP17L8	4	0.90504	0.90995	1	17312	1	-0.19197	0.0033608	0.010441	0.911854	214	2	-0.19197
LEF1	4	0.4455	0.62928	1	11852	1	2.3972	0.0033652	0.01045	0.911854	215	3	2.3972
CLIC5	4	0.17173	0.34491	1	6470	3	-5.4208	0.003398	0.010536	0.911854	216	1	-5.4208
GJB5	4	0.97923	0.97936	1	18659	0	0.77065	0.003398	0.010536	0.911854	217	2	0.77065
DDX39B	4	0.20133	0.38689	1	7232	2	-1.1948	0.0034018	0.010546	0.911854	218	2	-1.1948
IGDCC4	4	0.01517	0.049439	0.885816	1051	2	-1.9364	0.003428	0.010616	0.913723	219	2	-1.9364
TMEM37	4	0.98149	0.98151	1	18707	0	2.0741	0.0034505	0.010671	0.914213	220	3	2.0741
GADD45A	4	0.2299	0.42622	1	7968	2	-1.5219	0.0034806	0.010745	0.914213	221	2	-1.5219
CSAD	4	0.29245	0.50835	1	9413	2	-1.1156	0.0034882	0.010765	0.914213	222	2	-1.1156
LCE3D	4	0.98581	0.98577	1	18801	0	1.7439	0.0035565	0.010925	0.923662	223	2	1.7439
HEBP2	4	0.44513	0.62898	1	11847	2	-4.1041	0.0035865	0.010997	0.925655	224	1	-4.1041
TAF8	4	0.99631	0.99633	1	19019	0	1.9433	0.0036895	0.011271	0.934609	225	3	1.9433
CT47A1	3	0.94877	0.949	1	18041	0	3.5175	0.0036916	0.010203	0.911854	226	2	3.5175
ANKRD13B	4	0.24562	0.44735	1	8376	2	-3.1104	0.0037481	0.011414	0.934609	227	1	-3.1104
ZNHIT6	4	0.95174	0.95179	1	18095	0	-3.0477	0.0037481	0.011414	0.934609	228	1	-3.0477
TBX19	4	0.038563	0.11486	0.92969	2294	2	-1.9986	0.0037536	0.011427	0.934609	229	2	-1.9986
FITM2	4	0.99595	0.99594	1	19015	0	1.9688	0.0037908	0.011518	0.934609	230	3	1.9688
SEC14L4	4	0.063222	0.17634	0.965391	3436	2	-1.7241	0.0037929	0.011522	0.934609	231	2	-1.7241
CCDC150	4	0.32322	0.54109	1	10058	2	-0.6691	0.0038165	0.011575	0.934609	232	2	-0.6691
B4GAT1	4	0.72948	0.82674	1	15577	1	2.4932	0.0038451	0.011661	0.934609	233	3	2.4932
PLA2G2A	4	0.76597	0.83959	1	15862	1	2.2285	0.00386	0.011694	0.934609	234	3	2.2285
IGFLR1	4	0.91731	0.91944	1	17473	1	1.9237	0.0038804	0.011742	0.934609	235	3	1.9237
MAPKAPK2	4	0.40725	0.60154	1	11326	2	-0.21751	0.0039096	0.011807	0.934609	236	2	-0.21751
WNT16	4	0.37452	0.57789	1	10848	1	1.8249	0.003931	0.011859	0.934609	237	3	1.8249
NUDT8	4	0.99791	0.99791	1	19054	0	2.2899	0.0039478	0.011899	0.934609	238	3	2.2899
POLR2J2	4	0.99223	0.99225	1	18931	0	1.9186	0.0039499	0.011903	0.934609	239	3	1.9186
GSTA1	4	0.30737	0.52711	1	9781	2	-3.1946	0.0039635	0.011935	0.934609	240	1	-3.1946
ACBD7	4	0.35692	0.56523	1	10568	1	1.7462	0.0040157	0.012081	0.936462	241	3	1.7462
DMRTC1	4	0.20636	0.39399	1	7347	3	-5.3547	0.0040173	0.012089	0.936462	242	1	-5.3547
CYFIP2	4	0.083623	0.21017	0.969295	4083	2	-1.4155	0.0040447	0.012154	0.936462	243	2	-1.4155
PRPH	4	0.26332	0.47096	1	8734	1	-1.0379	0.0040712	0.012227	0.938021	244	2	-1.0379
KLHL5	4	0.96703	0.96707	1	18397	0	2.0384	0.0040985	0.012301	0.938021	245	3	2.0384
OR7A17	4	0.21689	0.40867	1	7629	1	1.5657	0.0041221	0.012362	0.938021	246	2	1.5657
HM13	4	0.30869	0.52874	1	9818	3	-4.0176	0.004125	0.012371	0.938021	247	1	-4.0176
RARG	3	0.39419	0.54928	1	11147	1	1.5241	0.0041459	0.011426	0.934609	248	2	1.5241
CFLAR	3	0.66004	0.72672	1	14861	1	3.6587	0.0042177	0.011613	0.934609	249	2	3.6587
C10orf91	4	0.1185	0.26516	0.979598	5130	1	0.93558	0.004221	0.01261	0.95106	250	2	0.93558
ITGB1BP1	4	0.2376	0.43667	1	8143	2	-1.7668	0.0042327	0.012642	0.95106	251	2	-1.7668
BIRC2	4	0.69382	0.81548	1	15349	1	2.1496	0.0042834	0.012771	0.951747	252	3	2.1496
CFAP46	4	0.81112	0.85782	1	16256	1	-3.8469	0.0042865	0.012778	0.951747	253	1	-3.8469
OR6C1	4	0.48395	0.65771	1	12427	1	1.9244	0.0042994	0.012807	0.951747	254	3	1.9244
NFIX	4	0.72948	0.82674	1	15589	1	1.7712	0.0043403	0.012907	0.951747	255	2	1.7712
SPOCK1	3	0.99561	0.99573	1	19009	0	1.6151	0.0043919	0.012115	0.936462	256	3	1.6151
ZNF492	4	0.25874	0.46486	1	8623	2	-2.1282	0.0043942	0.013025	0.951747	257	2	-2.1282
TCTN1	4	0.9928	0.99283	1	18940	0	2.6899	0.0044073	0.013051	0.951747	258	3	2.6899
MBNL1	4	0.71622	0.82242	1	15493	1	2.0294	0.0044306	0.013105	0.951747	259	3	2.0294
CYB561	4	0.97497	0.97513	1	18583	0	1.9394	0.0044407	0.013131	0.951747	260	3	1.9394
PUM1	4	0.0091095	0.030607	0.850487	671	3	-5.0956	0.004448	0.013152	0.951747	261	1	-5.0956
SPRR2F	4	0.94483	0.94487	1	17968	0	1.8706	0.0044646	0.013199	0.951747	262	2	1.8706
DCP1B	4	0.28954	0.50467	1	9384	2	-0.71489	0.0045436	0.013405	0.955039	263	2	-0.71489
KRT17	4	0.2296	0.42583	1	7918	3	-5.1753	0.0045556	0.013434	0.955039	264	1	-5.1753
DSCR3	4	0.46515	0.64369	1	12143	2	-3.8899	0.0045556	0.013434	0.955039	265	1	-3.8899
FIBCD1	4	0.62508	0.76476	1	14379	2	-0.74944	0.0046494	0.01366	0.955039	266	2	-0.74944
SOCS3	4	0.26493	0.47301	1	8742	1	-2.2747	0.0046633	0.013688	0.955039	267	1	-2.2747
SRP14	2	0.99184	0.99183	1	18919	0	4.1135	0.004666	0.0090541	0.900048	268	2	4.1135
TUBA3D	3	0.051736	0.12372	0.930434	2918	2	-4.8108	0.0046709	0.012903	0.951747	269	1	-4.8108
RMND5B	4	0.19137	0.37294	1	7015	1	1.7899	0.0046972	0.013781	0.955039	270	2	1.7899
CCT8	4	0.98778	0.98777	1	18838	0	1.8722	0.0047108	0.013824	0.955039	271	3	1.8722
SNED1	4	0.17056	0.3432	1	6457	1	-2.2506	0.0047171	0.013844	0.955039	272	1	-2.2506
OCEL1	4	0.63733	0.77417	1	14569	2	-3.9111	0.0047709	0.013986	0.955039	273	1	-3.9111
VAMP7	4	0.93099	0.93137	1	17726	1	1.8413	0.0047724	0.013992	0.955039	274	3	1.8413
VCX2	4	0.81112	0.85782	1	16235	1	1.8428	0.0047896	0.014037	0.955039	275	3	1.8428
SEC63	4	0.31093	0.53156	1	9826	2	-1.4745	0.0047936	0.01405	0.955039	276	2	-1.4745
FRMD6	4	0.99425	0.99428	1	18973	0	1.9979	0.004819	0.014113	0.955039	277	3	1.9979
PPP1R26	4	0.53107	0.6929	1	13093	2	-3.7231	0.0048247	0.014128	0.955039	278	1	-3.7231
EPHA10	4	0.030117	0.092118	0.917463	1873	2	-1.9568	0.0048378	0.014153	0.955039	279	2	-1.9568
DLG5	4	0.61323	0.75557	1	14223	2	-0.48854	0.0048422	0.014166	0.955039	280	2	-0.48854
SPPL3	4	0.9184	0.9203	1	17502	1	2.222	0.0048632	0.014219	0.955039	281	3	2.222
COLGALT1	4	0.62508	0.76476	1	14384	2	-0.65216	0.0048732	0.014249	0.955039	282	2	-0.65216
DMWD	4	0.06733	0.18329	0.965596	3568	1	1.2249	0.0048777	0.014266	0.955039	283	2	1.2249
FOXD4	4	0.90504	0.90995	1	17299	1	-1.1073	0.0048785	0.014266	0.955039	284	1	-1.1073
RPS18	2	0.9948	0.99476	1	18986	0	4.3829	0.0049219	0.0095717	0.900048	285	2	4.3829
RHOG	4	0.23288	0.43029	1	8025	3	-5.3935	0.0049323	0.014393	0.955039	286	1	-5.3935
ZNF292	4	0.41263	0.6055	1	11390	1	0.98121	0.0049861	0.014516	0.955039	287	2	0.98121
ZNF569	4	0.69057	0.81453	1	15322	1	0.11978	0.0050399	0.014658	0.955039	288	2	0.11978
GLRA3	4	0.45489	0.63616	1	11999	2	-1.2028	0.0050478	0.014675	0.955039	289	2	-1.2028
DNAH17	4	0.9417	0.94178	1	17902	0	2.2003	0.0050677	0.014721	0.955039	290	3	2.2003
TIPARP	4	0.86174	0.88252	1	16760	1	0.96554	0.0051385	0.014888	0.955039	291	2	0.96554
KIF9	4	0.88636	0.89717	1	17040	1	0.52948	0.0051864	0.015011	0.955039	292	2	0.52948
EIF4EBP3	3	0.5325	0.66813	1	13122	1	-2.539	0.0051957	0.014318	0.955039	293	1	-2.539
GLDN	4	0.65007	0.78417	1	14752	1	-1.3108	0.0052013	0.015049	0.955039	294	2	-1.3108
OSGIN1	4	0.68073	0.80823	1	15177	2	-2.8188	0.0052013	0.015049	0.955039	295	1	-2.8188
CTSV	4	0.60682	0.75062	1	14130	2	-2.5485	0.0052013	0.015049	0.955039	296	1	-2.5485
SLC28A1	4	0.32386	0.54156	1	10074	1	0.81083	0.005207	0.015065	0.955039	297	2	0.81083
GLB1	4	0.86021	0.88165	1	16750	1	2.1339	0.0052299	0.01512	0.955039	298	3	2.1339
APOF	4	0.99546	0.99546	1	19005	0	1.8594	0.0052823	0.01526	0.955039	299	3	1.8594
CCDC168	3	0.99466	0.99477	1	18984	0	1.7122	0.005343	0.014706	0.955039	300	3	1.7122
WDR73	4	0.93619	0.93625	1	17813	1	2.3404	0.0053477	0.015417	0.955039	301	3	2.3404
NGRN	4	0.042274	0.12461	0.932507	2506	2	-1.2841	0.0053546	0.015438	0.955039	302	2	-1.2841
MB	4	0.21004	0.39916	1	7460	1	2.1739	0.0053653	0.015466	0.955039	303	3	2.1739
TLR2	4	0.80809	0.8565	1	16219	1	2.461	0.0053894	0.015515	0.955039	304	3	2.461
ASB18	4	0.30099	0.5191	1	9637	1	0.4667	0.0054011	0.015548	0.955039	305	2	0.4667
IGFL2	4	0.025168	0.078305	0.914651	1598	1	1.927	0.005423	0.015606	0.955039	306	3	1.927
EVI5L	4	0.39735	0.59437	1	11175	2	-4.3166	0.0054434	0.015664	0.955039	307	1	-4.3166
SPEG	4	0.40597	0.60059	1	11294	2	-2.2937	0.0054434	0.015664	0.955039	308	2	-2.2937
FAM47A	4	0.9981	0.9981	1	19058	0	1.7145	0.005481	0.01575	0.955039	309	3	1.7145
LAMB2	4	0.60996	0.75303	1	14185	1	2.126	0.0054848	0.015759	0.955039	310	3	2.126
SPANXA2	4	0.78268	0.84607	1	15989	1	0.68372	0.0054854	0.015761	0.955039	311	2	0.68372
FAM69C	4	0.73971	0.83017	1	15654	1	0.94867	0.0055136	0.015838	0.955039	312	2	0.94867
LMO1	4	0.050846	0.14646	0.954823	2879	1	1.6945	0.0055338	0.015886	0.955039	313	3	1.6945
KDM4B	4	0.67426	0.80313	1	15099	2	-0.27625	0.0055466	0.01592	0.955039	314	2	-0.27625
HSD11B2	4	0.97821	0.97838	1	18638	0	2.0784	0.0055892	0.016019	0.955039	315	3	2.0784
BRMS1	3	0.99438	0.99448	1	18977	0	1.4894	0.0056238	0.015426	0.955039	316	3	1.4894
PRR36	4	0.8633	0.88342	1	16783	1	1.1455	0.0056316	0.016133	0.955039	317	2	1.1455
TTC24	4	0.69057	0.81453	1	15319	1	-0.11583	0.0056557	0.016189	0.955039	318	2	-0.11583
TMEM106B	3	0.99433	0.99443	1	18976	0	1.0813	0.0056688	0.015545	0.955039	319	3	1.0813
SERTAD2	4	0.56366	0.71749	1	13560	2	-2.7081	0.0057392	0.016398	0.955039	320	1	-2.7081
KRTAP9-8	4	0.99552	0.99551	1	19006	0	1.3267	0.005787	0.016506	0.955039	321	3	1.3267
ATOH7	4	0.82646	0.86471	1	16367	1	1.9987	0.005789	0.016511	0.955039	322	3	1.9987
ARMCX2	4	0.82944	0.86613	1	16413	1	2.2218	0.0058006	0.016545	0.955039	323	3	2.2218
RPS25	3	0.89077	0.89084	1	17102	0	2.261	0.0058414	0.016015	0.955039	324	2	2.261
UCP1	3	0.93981	0.94001	1	17888	0	2.9456	0.0058684	0.016077	0.955039	325	2	2.9456
IARS	4	0.67426	0.80313	1	15089	2	-3.2328	0.0058736	0.016732	0.955039	326	1	-3.2328
MTHFS	4	0.92878	0.92934	1	17669	1	-2.019	0.0058736	0.016732	0.955039	327	1	-2.019
DCUN1D4	4	0.12657	0.27757	0.98311	5360	2	-1.74	0.0058736	0.016732	0.955039	328	2	-1.74
EIF2B5	4	0.96513	0.96518	1	18368	0	0.73666	0.0058965	0.016788	0.955039	329	2	0.73666
SLC16A13	4	0.62712	0.76632	1	14417	1	0.92119	0.0059159	0.016838	0.955039	330	2	0.92119
CES4A	4	0.082636	0.20856	0.969295	4039	1	2.0129	0.005951	0.016931	0.955039	331	3	2.0129
HIATL1	4	0.89972	0.90613	1	17234	1	-0.41378	0.0059892	0.017038	0.955039	332	2	-0.41378
BIRC8	4	0.069635	0.1871	0.965596	3636	2	-2.7318	0.006008	0.01709	0.955039	333	2	-2.7318
MAST2	4	0.99675	0.99678	1	19035	0	1.7598	0.0060857	0.01729	0.955039	334	3	1.7598
CNTRL	4	0.11542	0.2604	0.977779	5015	3	-6.0295	0.0061155	0.017357	0.955039	335	1	-6.0295
DGAT1	4	0.72948	0.82674	1	15578	1	-0.097604	0.0061172	0.017361	0.955039	336	2	-0.097604
IZUMO3	4	0.46906	0.64664	1	12192	1	1.5128	0.0061603	0.017468	0.955039	337	3	1.5128
TRPS1	4	0.18297	0.36098	1	6770	1	2.507	0.0061668	0.017487	0.955039	338	3	2.507
RANGRF	4	0.2701	0.47964	1	8865	2	-0.2966	0.0061966	0.017557	0.955039	339	2	-0.2966
ATOH1	4	0.57226	0.72394	1	13676	1	2.1798	0.006203	0.017569	0.955039	340	3	2.1798
ZNF705B	4	0.22863	0.42452	1	7903	1	1.4221	0.006205	0.017575	0.955039	341	3	1.4221
ACTL9	4	0.33158	0.54713	1	10193	2	-2.7588	0.006223	0.017618	0.955039	342	1	-2.7588
MTMR14	4	0.89415	0.90227	1	17154	1	1.7811	0.0062417	0.017665	0.955039	343	3	1.7811
RPS15	4	0.96134	0.96132	1	18291	0	0.1663	0.0062565	0.017699	0.955039	344	2	0.1663
TBC1D14	4	0.30851	0.52851	1	9807	1	1.7585	0.0062868	0.017772	0.955039	345	3	1.7585
TNNT1	3	0.99368	0.99382	1	18959	0	1.558	0.0063179	0.017259	0.955039	346	3	1.558
MCF2L2	4	0.26877	0.47788	1	8849	2	-1.4446	0.0063368	0.017889	0.955039	347	2	-1.4446
L3MBTL3	4	0.87351	0.88933	1	16897	1	-0.56937	0.006362	0.017961	0.955039	348	2	-0.56937
GSDMC	4	0.9102	0.91381	1	17368	1	1.9829	0.0063843	0.01802	0.955039	349	3	1.9829
C20orf173	4	0.59424	0.7409	1	13975	2	-1.0036	0.0064024	0.018057	0.955039	350	2	-1.0036
SMC4	3	0.37073	0.5256	1	10777	2	-5.1162	0.0064061	0.017495	0.955039	351	1	-5.1162
CELA2A	4	0.48395	0.65771	1	12439	1	0.98914	0.0064226	0.018106	0.955039	352	2	0.98914
UBE2D3	4	0.64349	0.77898	1	14619	2	-3.6642	0.006438	0.018149	0.955039	353	1	-3.6642
PPL	4	0.39735	0.59437	1	11186	2	-1.1801	0.0064886	0.018264	0.955039	354	2	-1.1801
ZSWIM8	4	0.045873	0.13391	0.945235	2659	3	-5.1622	0.0065455	0.018409	0.955039	355	1	-5.1622
TMEM8A	4	0.63733	0.77417	1	14556	2	-1.6227	0.0065455	0.018409	0.955039	356	2	-1.6227
TRPM3	4	0.17922	0.35559	1	6677	3	-5.8231	0.0065455	0.018409	0.955039	357	1	-5.8231
AADACL2	4	0.92427	0.92537	1	17598	1	2.0941	0.0065467	0.018413	0.955039	358	3	2.0941
PIP5K1B	4	0.96816	0.96822	1	18424	0	2.0613	0.0065703	0.018472	0.955039	359	3	2.0613
CNPY4	4	0.82322	0.86323	1	16352	1	1.9848	0.006601	0.018545	0.955039	360	2	1.9848
PRKACG	4	0.81717	0.86047	1	16282	1	1.6202	0.0066292	0.018614	0.955039	361	3	1.6202
OR4N4	4	0.9102	0.91381	1	17365	1	1.8167	0.006637	0.018633	0.955039	362	3	1.8167
FCRL6	3	0.6249	0.70937	1	14365	1	2.8486	0.0066586	0.018144	0.955039	363	2	2.8486
PF4	4	0.46906	0.64664	1	12199	1	1.8777	0.0067123	0.018833	0.955039	364	3	1.8777
SPATS1	4	0.0021854	0.0078151	0.73709	199	2	-1.5276	0.0067144	0.018842	0.955039	365	2	-1.5276
NMNAT3	4	0.32836	0.54483	1	10129	1	0.56943	0.0067506	0.018944	0.955039	366	2	0.56943
FAM3D	4	0.43379	0.62083	1	11673	1	-0.74849	0.0067604	0.018971	0.955039	367	1	-0.74849
MAU2	4	0.78601	0.84739	1	16030	1	1.6431	0.0068037	0.019069	0.955039	368	3	1.6431
PRPH2	4	0.35871	0.56649	1	10580	1	-0.27749	0.0068052	0.019073	0.955039	369	2	-0.27749
GP6	4	0.80809	0.8565	1	16217	1	1.534	0.0068123	0.019092	0.955039	370	3	1.534
SLC2A11	4	0.78601	0.84739	1	16034	1	0.15273	0.0068142	0.019094	0.955039	371	2	0.15273
F8A1	4	0.61313	0.75549	1	14216	1	2.3777	0.0068545	0.019186	0.955039	372	3	2.3777
SRSF6	4	0.53107	0.6929	1	13084	2	-4.4125	0.0068679	0.019215	0.955039	373	1	-4.4125
TMEM147	3	0.9344	0.93456	1	17778	0	3.2637	0.0068745	0.018728	0.955039	374	2	3.2637
ZDHHC3	3	0.32957	0.48345	1	10149	2	-5.3255	0.00689	0.018765	0.955039	375	1	-5.3255
CEP128	4	0.15879	0.32603	1	6172	1	1.6772	0.0069024	0.019297	0.955039	376	3	1.6772
CHUK	4	0.99199	0.99202	1	18928	0	1.968	0.006922	0.01934	0.955039	377	3	1.968
MECP2	4	0.95174	0.95179	1	18107	0	1.5584	0.0069308	0.019361	0.955039	378	3	1.5584
ULBP3	4	0.26526	0.47343	1	8754	2	-1.6064	0.0069596	0.019431	0.955039	379	2	-1.6064
HTRA1	4	0.16416	0.33388	1	6297	1	-0.70795	0.0069753	0.019483	0.955039	380	1	-0.70795
MCU	4	0.70976	0.82033	1	15450	1	0.99537	0.0070123	0.01958	0.955039	381	2	0.99537
DSCC1	4	0.90236	0.908	1	17268	1	-1.3168	0.0070291	0.019615	0.955039	382	2	-1.3168
TMEM254	4	0.89694	0.90419	1	17186	1	1.7613	0.0070317	0.019622	0.955039	383	3	1.7613
FBRSL1	4	0.053103	0.15215	0.956836	2991	1	1.566	0.007077	0.019735	0.955039	384	3	1.566
SERPINC1	4	0.30851	0.52851	1	9816	1	0.98061	0.0070864	0.019756	0.955039	385	2	0.98061
CT45A7	4	0.73971	0.83017	1	15660	1	2.2279	0.0071247	0.019868	0.955039	386	3	2.2279
ASB13	4	0.9887	0.9887	1	18860	0	1.5235	0.0071805	0.020008	0.955039	387	3	1.5235
RAD51C	4	0.13632	0.29239	0.990545	5588	3	-4.7795	0.0071902	0.020032	0.955039	388	1	-4.7795
TMEM211	4	0.22714	0.42249	1	7874	2	-2.8765	0.0071902	0.020032	0.955039	389	1	-2.8765
GML	4	0.98336	0.98336	1	18742	0	0.53272	0.0071902	0.020032	0.955039	390	2	0.53272
SRGAP2C	4	0.45135	0.63352	1	11936	1	1.7621	0.007241	0.020137	0.955039	391	3	1.7621
APRT	4	0.99283	0.99286	1	18943	0	1.6982	0.0072522	0.020169	0.955039	392	3	1.6982
UGT2A2	3	0.93439	0.93455	1	17777	0	2.6659	0.0072544	0.019727	0.955039	393	2	2.6659
PIK3R5	4	0.95575	0.9558	1	18178	0	1.4943	0.0072545	0.020177	0.955039	394	3	1.4943
FOLH1	3	0.20057	0.34872	1	7209	1	-0.46487	0.0072931	0.019818	0.955039	395	1	-0.46487
SHC2	4	0.043538	0.12796	0.932507	2578	3	-6.3823	0.0072976	0.020274	0.955039	396	1	-6.3823
PHLDA1	4	0.56594	0.7192	1	13582	1	1.3951	0.0073041	0.02029	0.955039	397	3	1.3951
INSL6	4	0.99513	0.99514	1	18993	0	1.997	0.007311	0.020309	0.955039	398	2	1.997
MT3	4	0.80151	0.85372	1	16170	1	0.91582	0.0073353	0.020368	0.955039	399	2	0.91582
LTN1	4	0.95874	0.95876	1	18250	0	1.8393	0.0073426	0.020384	0.955039	400	3	1.8393
PPP2R3A	4	0.069635	0.1871	0.965596	3640	3	-6.3975	0.0073514	0.020401	0.955039	401	1	-6.3975
CXCL12	4	0.86747	0.88578	1	16823	1	1.7814	0.0073539	0.020408	0.955039	402	3	1.7814
DNM1	4	0.99487	0.99488	1	18988	0	1.6407	0.007363	0.020424	0.955039	403	3	1.6407
DPPA5	4	0.98639	0.98635	1	18808	0	1.8256	0.0073857	0.020478	0.955039	404	3	1.8256
PGP	4	0.98237	0.98239	1	18725	0	1.8309	0.0073903	0.020489	0.955039	405	3	1.8309
VN1R2	4	0.82016	0.8618	1	16326	1	-0.25205	0.0073974	0.020506	0.955039	406	2	-0.25205
C17orf96	4	0.95575	0.9558	1	18181	0	-0.29456	0.0074588	0.02066	0.955039	407	2	-0.29456
C17orf82	4	0.87041	0.88748	1	16865	1	2.0321	0.0074714	0.020686	0.955039	408	3	2.0321
UCP2	4	0.99527	0.99527	1	18998	0	1.6424	0.0074748	0.020693	0.955039	409	3	1.6424
CATSPER4	4	0.94778	0.94784	1	18033	0	2.2291	0.0074898	0.020728	0.955039	410	3	2.2291
XPC	4	0.80486	0.85513	1	16207	1	1.2891	0.0074952	0.020743	0.955039	411	2	1.2891
AGER	4	0.99618	0.99619	1	19017	0	1.4357	0.00753	0.020828	0.955039	412	3	1.4357
TMEM114	4	0.96043	0.96047	1	18282	0	2.2623	0.0075635	0.02091	0.955039	413	3	2.2623
PRNP	4	0.9971	0.99711	1	19041	0	1.6907	0.0075669	0.020919	0.955039	414	3	1.6907
APBB1IP	4	0.78268	0.84607	1	15996	1	1.7361	0.0075831	0.020956	0.955039	415	3	1.7361
KLC3	4	0.46241	0.64175	1	12095	2	-2.5651	0.0076199	0.021034	0.955039	416	1	-2.5651
PRKCZ	4	0.97576	0.97593	1	18602	0	1.684	0.0076321	0.021057	0.955039	417	2	1.684
TMEM171	4	0.99377	0.9938	1	18962	0	1.7278	0.0076504	0.021098	0.955039	418	3	1.7278
CRLF3	4	0.27876	0.49085	1	9106	2	-4.0616	0.0076736	0.021148	0.955039	419	1	-4.0616
NGEF	4	0.28077	0.4935	1	9147	1	1.5837	0.0077018	0.021215	0.955039	420	3	1.5837
IL31	4	0.19624	0.3797	1	7126	1	1.6188	0.0077148	0.021246	0.955039	421	2	1.6188
RNF145	4	0.98639	0.98635	1	18806	0	1.527	0.0077181	0.021256	0.955039	422	3	1.527
LLPH	4	0.45007	0.63256	1	11925	2	-4.7558	0.0077272	0.021282	0.955039	423	1	-4.7558
KRT6C	4	0.88122	0.89391	1	16976	1	2.1891	0.0077313	0.021292	0.955039	424	3	2.1891
ARIH2	4	0.72948	0.82674	1	15582	1	1.6428	0.0077721	0.021398	0.957377	425	3	1.6428
HIF1AN	4	0.1873	0.36714	1	6908	1	1.423	0.0077933	0.021444	0.957377	426	3	1.423
CA12	4	0.17413	0.34836	1	6548	2	-2.5794	0.0078346	0.021547	0.959738	427	2	-2.5794
ZNF837	4	0.80486	0.85513	1	16191	1	1.4753	0.0078869	0.021675	0.961097	428	3	1.4753
CNTN1	4	0.64053	0.77666	1	14598	2	-3.2804	0.0078883	0.021678	0.961097	429	1	-3.2804
OXCT2	4	0.67406	0.80298	1	15072	1	2.2177	0.0079342	0.021788	0.961408	430	3	2.2177
SOX13	4	0.23306	0.43054	1	8035	1	-0.76554	0.007942	0.021802	0.961408	431	2	-0.76554
RPS4Y1	4	0.99666	0.99669	1	19031	0	1.4175	0.007988	0.021914	0.961408	432	3	1.4175
DPP7	4	0.25558	0.46064	1	8580	2	-1.5424	0.0079934	0.021931	0.961408	433	2	-1.5424
SUGCT	4	0.98372	0.98371	1	18750	0	1.5503	0.0080503	0.022076	0.961408	434	3	1.5503
GLIS3	4	0.9694	0.96946	1	18452	0	1.952	0.0080913	0.022186	0.961408	435	3	1.952
MXRA7	4	0.93961	0.93973	1	17867	0	-0.58985	0.008103	0.022211	0.961408	436	2	-0.58985
CEP170B	4	0.50751	0.67532	1	12767	1	0.42123	0.008103	0.022211	0.961408	437	2	0.42123
PKN2	4	0.39252	0.59084	1	11127	2	-1.8211	0.008103	0.022211	0.961408	438	2	-1.8211
AMY1B	4	0.46515	0.64369	1	12133	2	-3.7263	0.008103	0.022211	0.961408	439	1	-3.7263
FAM72D	4	0.75315	0.83496	1	15778	1	1.9808	0.0081372	0.022297	0.961408	440	3	1.9808
PIGH	4	0.18373	0.36206	1	6815	2	-1.8838	0.0081458	0.022319	0.961408	441	2	-1.8838
PRTFDC1	4	0.86611	0.88501	1	16813	1	1.7194	0.0081675	0.022371	0.961408	442	3	1.7194
GCNT3	4	0.64054	0.77667	1	14605	1	1.8714	0.0082595	0.022588	0.963943	443	3	1.8714
IFNLR1	4	0.15329	0.31779	1	6028	3	-4.4455	0.0082641	0.0226	0.963943	444	1	-4.4455
CT47A5	3	0.99172	0.99185	1	18916	0	1.8865	0.0082821	0.02239	0.961408	445	3	1.8865
SLAMF8	4	0.23446	0.43245	1	8052	2	-1.4231	0.0082881	0.02266	0.964332	446	2	-1.4231
HLA-DQB1	3	0.99166	0.99179	1	18915	0	1.6044	0.0083369	0.022536	0.963943	447	3	1.6044
EXOC3L2	4	0.94572	0.94575	1	17991	0	0.47074	0.0083714	0.022859	0.964891	448	1	0.47074
CYB5D2	4	0.17617	0.35129	1	6614	3	-5.6247	0.0084251	0.022981	0.964891	449	1	-5.6247
NFATC4	4	0.98917	0.98916	1	18870	0	2.2933	0.0084584	0.023068	0.964891	450	3	2.2933
MRPS10	4	0.4919	0.66364	1	12531	2	-3.4173	0.0084787	0.023116	0.964891	451	1	-3.4173
DUSP9	4	0.45745	0.63809	1	12030	1	1.5514	0.0085057	0.023189	0.964891	452	3	1.5514
AZIN1	4	0.73316	0.82794	1	15605	1	1.4666	0.0085081	0.023193	0.964891	453	3	1.4666
FRRS1	4	0.93209	0.93237	1	17740	1	-1.573	0.008586	0.023388	0.964891	454	1	-1.573
OPLAH	4	0.70341	0.81836	1	15411	1	1.3042	0.0085894	0.023395	0.964891	455	3	1.3042
GRAPL	4	0.99272	0.99275	1	18935	0	1.7104	0.0086283	0.023501	0.964891	456	3	1.7104
C17orf107	4	0.88895	0.89883	1	17079	1	-0.27819	0.0086373	0.023524	0.964891	457	2	-0.27819
CRYZL1	4	0.17958	0.35613	1	6714	2	-1.777	0.0086397	0.023527	0.964891	458	2	-1.777
MAPKBP1	4	0.4874	0.66027	1	12498	1	-0.64351	0.0086752	0.02362	0.964891	459	2	-0.64351
EME2	4	0.99425	0.99428	1	18971	0	1.8608	0.0086837	0.023637	0.964891	460	3	1.8608
PRR20D	4	0.44255	0.62717	1	11792	1	-1.983	0.0086933	0.023664	0.964891	461	1	-1.983
GUCA1A	3	0.11977	0.25743	0.977779	5161	1	2.3462	0.0086952	0.023435	0.964891	462	2	2.3462
COMMD2	3	0.090258	0.20211	0.969295	4282	2	-4.423	0.0087032	0.02346	0.964891	463	1	-4.423
GGN	4	0.80151	0.85372	1	16181	1	1.4608	0.008714	0.023715	0.964891	464	3	1.4608
CORO1C	4	0.91731	0.91944	1	17477	1	0.80814	0.0087572	0.02382	0.964891	465	2	0.80814
CMTR2	4	0.31321	0.53407	1	9921	1	1.1353	0.0087596	0.023825	0.964891	466	3	1.1353
RTBDN	4	0.77938	0.84471	1	15960	1	0.97238	0.0087738	0.023868	0.964891	467	2	0.97238
DFFB	4	0.21497	0.406	1	7582	3	-4.7309	0.0087738	0.023868	0.964891	468	1	-4.7309
HTN1	4	0.99297	0.993	1	18948	0	1.7346	0.0087927	0.023909	0.964891	469	3	1.7346
DDX27	2	0.58342	0.60454	1	13827	1	-0.079056	0.0087969	0.016689	0.955039	470	1	-0.079056
MYH6	3	0.47109	0.62628	1	12246	2	-4.423	0.008824	0.023673	0.964891	471	1	-4.423
GNAO1	4	0.13682	0.29315	0.990545	5623	1	2.0411	0.0088454	0.024034	0.964891	472	3	2.0411
SPATA21	4	0.66846	0.79853	1	14999	2	-1.8949	0.0088811	0.024129	0.964891	473	1	-1.8949
SP1	4	0.13161	0.28524	0.98845	5479	2	-2.3127	0.0088811	0.024129	0.964891	474	2	-2.3127
FAM229A	4	0.97923	0.97936	1	18654	0	1.5813	0.0088926	0.024152	0.964891	475	2	1.5813
HIST1H2AK	4	0.82944	0.86613	1	16398	1	1.7179	0.0088948	0.02416	0.964891	476	3	1.7179
LCE2C	4	0.08726	0.21608	0.969459	4200	1	1.5592	0.0089128	0.024203	0.964891	477	3	1.5592
NRN1L	4	0.4455	0.62928	1	11861	1	1.6421	0.0089719	0.024352	0.964891	478	3	1.6421
CHRAC1	4	0.35196	0.56172	1	10474	2	-1.194	0.0089815	0.024377	0.964891	479	2	-1.194
TSKU	4	0.85027	0.87633	1	16627	1	1.5094	0.0090003	0.024423	0.964891	480	3	1.5094
LOC400863	4	0.27527	0.48632	1	8989	2	-2.4815	0.0090152	0.024454	0.964891	481	2	-2.4815
STOML1	4	0.71972	0.82359	1	15521	1	-3.1744	0.0090689	0.02459	0.964891	482	1	-3.1744
C3orf35	4	0.41554	0.60756	1	11417	1	1.3845	0.0090707	0.024594	0.964891	483	2	1.3845
CLPTM1	4	0.99292	0.99295	1	18944	0	1.2052	0.0090754	0.024608	0.964891	484	3	1.2052
CRYGN	4	0.9076	0.91184	1	17330	1	-0.76508	0.0091225	0.02471	0.964891	485	2	-0.76508
C10orf99	4	0.60078	0.74596	1	14070	1	2.2056	0.00913	0.024736	0.964891	486	3	2.2056
C10orf107	4	0.14876	0.31108	1	5886	1	1.7097	0.0091483	0.02478	0.964891	487	3	1.7097
NIM1K	4	0.92664	0.92744	1	17639	1	1.5911	0.0091783	0.024858	0.964891	488	3	1.5911
ADIPOQ	4	0.50784	0.67558	1	12795	2	-3.2178	0.0092298	0.024991	0.964891	489	1	-3.2178
CLDN3	4	0.98639	0.98635	1	18812	0	1.6389	0.0092702	0.025083	0.964891	490	3	1.6389
RAX2	4	0.9883	0.9883	1	18855	0	1.4794	0.0092978	0.025157	0.964891	491	3	1.4794
OXER1	3	0.8458	0.84792	1	16585	1	-4.0565	0.0093675	0.024599	0.964891	492	1	-4.0565
HERPUD2	4	0.9915	0.99154	1	18912	0	1.4183	0.0093785	0.025355	0.964891	493	3	1.4183
MYL9	4	0.16312	0.33236	1	6271	3	-5.7986	0.0093906	0.025385	0.964891	494	1	-5.7986
PANX2	4	0.47608	0.6519	1	12302	1	1.4544	0.009409	0.025432	0.964891	495	3	1.4544
RAB5C	4	0.85631	0.87954	1	16706	1	1.7973	0.0094143	0.025443	0.964891	496	3	1.7973
C19orf73	4	0.89277	0.90133	1	17126	1	1.9456	0.0094223	0.02546	0.964891	497	3	1.9456
GCNT1	4	0.31115	0.53184	1	9860	2	-1.533	0.0094441	0.025514	0.964891	498	2	-1.533
PXYLP1	4	0.95174	0.95179	1	18100	0	-0.43585	0.0094443	0.025514	0.964891	499	2	-0.43585
CASQ2	4	0.9102	0.91381	1	17355	1	-1.7868	0.0094979	0.025649	0.964891	500	2	-1.7868
CYP26C1	3	0.74151	0.77253	1	15671	1	-1.7589	0.0095084	0.024833	0.964891	501	1	-1.7589
PLRG1	4	0.19442	0.37714	1	7083	3	-4.491	0.0095515	0.025779	0.964891	502	1	-4.491
FRG2	4	0.9883	0.9883	1	18853	0	1.6855	0.0095746	0.025845	0.964891	503	3	1.6855
OR10A6	4	0.31936	0.53844	1	9993	2	-1.7788	0.0095905	0.02588	0.964891	504	2	-1.7788
CCNI2	4	0.36559	0.57148	1	10698	1	1.5748	0.0096325	0.025967	0.964891	505	3	1.5748
SEMA3A	4	0.76597	0.83959	1	15856	1	1.5079	0.0096325	0.025967	0.964891	506	3	1.5079
BCL11B	4	0.29894	0.51654	1	9544	2	-1.1943	0.0097124	0.026179	0.964891	507	2	-1.1943
RGS16	4	0.80486	0.85513	1	16206	1	-1.2634	0.0097124	0.026179	0.964891	508	2	-1.2634
GRXCR2	4	0.91134	0.91466	1	17382	1	2.187	0.0097257	0.026209	0.964891	509	3	2.187
CBFA2T2	4	0.97639	0.97658	1	18611	0	1.9207	0.0097319	0.026219	0.964891	510	3	1.9207
ARHGAP29	4	0.62013	0.76089	1	14333	1	1.8624	0.0098211	0.026432	0.964891	511	3	1.8624
C9orf170	4	0.99082	0.99082	1	18902	0	1.7121	0.0098279	0.026451	0.964891	512	3	1.7121
C19orf67	4	0.80151	0.85372	1	16176	1	0.40116	0.0098732	0.026552	0.964891	513	3	0.40116
UBAC2	4	0.9719	0.97205	1	18504	0	1.6829	0.0098786	0.026563	0.964891	514	3	1.6829
NLGN2	4	0.94892	0.94896	1	18043	0	1.7377	0.0098923	0.026593	0.964891	515	3	1.7377
MPC1	4	0.67739	0.80561	1	15148	1	0.61054	0.0099268	0.026672	0.964891	516	2	0.61054
PRMT3	4	0.67406	0.80298	1	15064	1	1.3619	0.0099445	0.026719	0.964891	517	3	1.3619
DSG2	4	0.024453	0.076331	0.914651	1560	1	1.1051	0.0099472	0.026723	0.964891	518	3	1.1051
OR14C36	4	0.99813	0.99813	1	19060	0	1.4739	0.0099527	0.026735	0.964891	519	3	1.4739
SLC14A2	4	0.036142	0.10846	0.929217	2176	1	1.8019	0.009955	0.026737	0.964891	520	3	1.8019
ULBP1	4	0.56366	0.71749	1	13550	2	-1.6118	0.0099804	0.026802	0.964891	521	2	-1.6118
OR51L1	4	0.12093	0.26895	0.980932	5200	2	-3.2446	0.010034	0.026937	0.964891	522	1	-3.2446
SPOCD1	4	0.93626	0.93632	1	17814	1	0.65954	0.010088	0.027058	0.964891	523	2	0.65954
CDH24	4	0.62013	0.76089	1	14317	1	1.8217	0.010133	0.027174	0.964891	524	3	1.8217
PRM1	4	0.12943	0.28195	0.986075	5425	1	1.7854	0.010155	0.027231	0.964891	525	3	1.7854
PTK6	4	0.92195	0.92338	1	17564	1	-0.48513	0.010168	0.027263	0.964891	526	2	-0.48513
ZNF644	4	0.071777	0.19065	0.965596	3701	3	-6.0907	0.010168	0.027263	0.964891	527	1	-6.0907
TMEM156	4	0.98232	0.98233	1	18724	0	1.5325	0.010169	0.027265	0.964891	528	3	1.5325
NAAA	4	0.97805	0.97821	1	18633	0	1.1909	0.01019	0.027321	0.964891	529	2	1.1909
ANXA2	4	0.84314	0.8727	1	16550	1	1.6706	0.010212	0.027376	0.964891	530	3	1.6706
TCTEX1D4	3	0.92262	0.92274	1	17580	0	0.064592	0.010233	0.026032	0.964891	531	1	0.064592
PMFBP1	4	0.86031	0.88171	1	16752	1	1.4662	0.010244	0.027445	0.964891	532	2	1.4662
NKAPL	4	0.87351	0.88933	1	16896	1	1.3344	0.010277	0.027535	0.964891	533	3	1.3344
OR51I1	4	0.59767	0.74352	1	14020	2	-0.056299	0.010282	0.027544	0.964891	534	2	-0.056299
CDK5R1	4	0.79568	0.85128	1	16127	1	2.153	0.010294	0.027573	0.964891	535	3	2.153
MFSD1	4	0.92427	0.92537	1	17595	1	0.19501	0.010302	0.027597	0.964891	536	2	0.19501
NMB	4	0.9595	0.95952	1	18260	0	2.0335	0.010332	0.027672	0.964891	537	3	2.0335
STARD10	4	0.18721	0.36702	1	6884	3	-5.483	0.010356	0.02774	0.964891	538	1	-5.483
SPANXA1	4	0.59429	0.74093	1	14000	2	-3.7144	0.010409	0.027888	0.964891	539	1	-3.7144
PHF12	4	0.47076	0.6479	1	12222	2	-1.032	0.010412	0.027893	0.964891	540	2	-1.032
MRGPRX4	4	0.9972	0.9972	1	19043	0	1.8322	0.010434	0.027947	0.964891	541	3	1.8322
RALGAPB	4	0.84476	0.87351	1	16570	1	2.071	0.010445	0.027971	0.964891	542	3	2.071
TERF1	4	0.9537	0.95373	1	18143	0	-0.34371	0.010463	0.028021	0.964891	543	2	-0.34371
TTLL11	4	0.015976	0.051949	0.887479	1098	2	-2.2879	0.010516	0.028157	0.964891	544	2	-2.2879
SGTA	3	0.79767	0.80985	1	16141	1	2.3193	0.010554	0.02657	0.964891	545	2	2.3193
IFNA10	4	0.25488	0.45972	1	8543	3	-5.341	0.01057	0.028287	0.964891	546	1	-5.341
DNAI2	4	0.96615	0.96621	1	18382	0	1.0957	0.010597	0.028344	0.964891	547	2	1.0957
GJD4	4	0.62712	0.76632	1	14414	1	1.3804	0.010613	0.028379	0.964891	548	3	1.3804
ZNHIT1	4	0.12799	0.27975	0.983339	5394	3	-5.5641	0.010623	0.02841	0.964891	549	1	-5.5641
ARHGEF17	3	0.7945	0.80761	1	16109	1	2.7814	0.010632	0.026701	0.964891	550	2	2.7814
CD46	4	0.82016	0.8618	1	16321	1	1.8785	0.010652	0.028479	0.964891	551	3	1.8785
FAM167A	4	0.99306	0.99307	1	18951	0	1.6427	0.01071	0.028593	0.964891	552	3	1.6427
AMPD1	4	0.61323	0.75557	1	14228	2	-1.0373	0.010735	0.02866	0.964891	553	2	-1.0373
MCM4	3	0.94529	0.94551	1	17972	0	0.5299	0.010755	0.026911	0.964891	554	2	0.5299
SLC16A11	4	0.14217	0.30123	0.993682	5723	3	-5.7199	0.010757	0.028711	0.964891	555	1	-5.7199
USP17L20	4	0.30851	0.52851	1	9803	2	-3.7328	0.010757	0.028711	0.964891	556	1	-3.7328
HMGA2	4	0.7466	0.83262	1	15717	1	-0.95706	0.010757	0.028711	0.964891	557	2	-0.95706
PIGF	4	0.88767	0.89801	1	17074	1	1.6339	0.010773	0.028747	0.964891	558	3	1.6339
RGPD5	4	0.79568	0.85128	1	16117	1	1.6316	0.010833	0.028888	0.964891	559	3	1.6316
PALB2	4	0.52845	0.69098	1	13070	1	1.3602	0.010842	0.028907	0.964891	560	3	1.3602
ARFGEF1	4	0.33274	0.54792	1	10199	1	1.9442	0.010847	0.028924	0.964891	561	3	1.9442
KIF15	4	0.98455	0.98454	1	18774	0	1.7866	0.010855	0.02894	0.964891	562	3	1.7866
CSNK2A1	4	0.99661	0.99665	1	19029	0	1.3419	0.010859	0.028953	0.964891	563	3	1.3419
SSTR4	4	0.55256	0.709	1	13370	2	-1.9067	0.010891	0.029032	0.964891	564	2	-1.9067
PRKCD	4	0.87351	0.88933	1	16894	1	1.8138	0.01091	0.029075	0.964891	565	3	1.8138
LBX2	3	0.9814	0.98155	1	18705	0	0.4614	0.010916	0.027206	0.964891	566	1	0.4614
INO80D	4	0.55919	0.7141	1	13494	2	-0.87965	0.01093	0.029121	0.964891	567	2	-0.87965
CKMT1A	3	0.68537	0.74003	1	15249	1	2.5137	0.010949	0.027256	0.964891	568	2	2.5137
ZNF680	4	0.8187	0.86116	1	16308	1	1.2085	0.01098	0.029231	0.964891	569	3	1.2085
ALG13	4	0.80486	0.85513	1	16202	1	-2.1401	0.010998	0.02928	0.964891	570	1	-2.1401
SPRR2E	4	0.5441	0.70266	1	13260	2	-0.59719	0.011008	0.029307	0.964891	571	2	-0.59719
C14orf159	4	0.82322	0.86323	1	16338	1	1.3796	0.011039	0.029387	0.964891	572	3	1.3796
PASD1	4	0.83832	0.87039	1	16510	1	0.50693	0.011052	0.02942	0.964891	573	2	0.50693
CUBN	4	0.99405	0.9941	1	18968	0	1.4516	0.011064	0.029442	0.964891	574	3	1.4516
KCNE4	4	0.45135	0.63352	1	11943	1	1.3909	0.011099	0.029528	0.964891	575	3	1.3909
ASCL4	4	0.72299	0.82465	1	15551	1	1.8119	0.011106	0.029544	0.964891	576	3	1.8119
RCC1	3	0.9723	0.97247	1	18511	0	2.4017	0.011147	0.027577	0.964891	577	2	2.4017
MDM4	4	0.75638	0.83612	1	15790	1	-3.1936	0.011159	0.02968	0.964891	578	1	-3.1936
FXR2	4	0.51718	0.68252	1	12902	1	1.9933	0.011179	0.029718	0.964891	579	3	1.9933
ACTR3C	4	0.068634	0.18546	0.965596	3619	2	-5.5702	0.011213	0.029799	0.964891	580	1	-5.5702
AP3M2	4	0.83232	0.86752	1	16425	1	2.0605	0.011237	0.029858	0.964891	581	3	2.0605
NEDD8	4	0.55919	0.7141	1	13485	1	-0.74277	0.011266	0.029925	0.964891	582	2	-0.74277
RBM6	4	0.20414	0.39083	1	7319	1	1.6086	0.011271	0.029936	0.964891	583	2	1.6086
POMZP3	4	0.97069	0.97076	1	18472	0	1.8306	0.01128	0.029963	0.964891	584	3	1.8306
F10	4	0.61313	0.75549	1	14207	1	1.9867	0.011313	0.030033	0.964891	585	3	1.9867
MSRA	4	0.12387	0.27345	0.98119	5269	2	-3.2712	0.01132	0.030047	0.964891	586	1	-3.2712
SLC45A1	4	0.41101	0.60434	1	11362	2	-1.6366	0.01135	0.030118	0.964891	587	2	-1.6366
COQ3	4	0.43107	0.61885	1	11644	2	-0.92311	0.011367	0.030162	0.964891	588	2	-0.92311
TLCD1	4	0.92195	0.92338	1	17572	1	-2.2175	0.011373	0.030183	0.964891	589	1	-2.2175
HRSP12	4	0.58138	0.73101	1	13784	1	2.0823	0.011492	0.030462	0.967888	590	3	2.0823
MOAP1	4	0.94572	0.94575	1	17988	0	-2.2776	0.011507	0.030493	0.967888	591	1	-2.2776
MZT2B	4	0.93961	0.93973	1	17870	0	-1.8071	0.011507	0.030493	0.967888	592	1	-1.8071
PPIAL4A	4	0.10942	0.25108	0.977779	4849	1	-0.44519	0.01155	0.030599	0.968208	593	2	-0.44519
CEBPA	4	0.59072	0.73822	1	13908	1	1.7316	0.011598	0.030721	0.968208	594	3	1.7316
SIDT2	4	0.47937	0.65432	1	12365	2	-0.46023	0.011637	0.030808	0.968208	595	2	-0.46023
HTR1D	4	0.68712	0.81327	1	15262	1	-0.67943	0.011641	0.030821	0.968208	596	3	-0.67943
SHPRH	4	0.64975	0.7839	1	14705	2	-0.89754	0.011657	0.030858	0.968208	597	2	-0.89754
ZNF169	4	0.29307	0.50911	1	9439	1	-0.83864	0.011694	0.030948	0.968561	598	2	-0.83864
HARS2	4	0.64699	0.78174	1	14683	1	-0.53652	0.011711	0.030992	0.968561	599	2	-0.53652
INPP5E	4	0.41593	0.60784	1	11438	2	-1.3434	0.011741	0.031072	0.968561	600	2	-1.3434
POLR2E	4	0.90236	0.908	1	17258	1	-0.38248	0.011741	0.031072	0.968561	601	2	-0.38248
ZNF184	4	0.35005	0.56037	1	10445	1	1.6692	0.011792	0.031198	0.970081	602	3	1.6692
NPB	4	0.72299	0.82465	1	15547	1	1.9439	0.011821	0.031261	0.970081	603	3	1.9439
ACPP	4	0.68386	0.81068	1	15231	1	1.73	0.011825	0.031278	0.970081	604	3	1.73
SAC3D1	4	0.20636	0.39399	1	7345	3	-5.6453	0.011855	0.031349	0.970081	605	1	-5.6453
OR1K1	4	0.15076	0.31402	1	5954	1	1.4421	0.011886	0.031411	0.970081	606	2	1.4421
HTR2C	4	0.32501	0.5424	1	10089	2	-0.93006	0.011909	0.031476	0.970081	607	2	-0.93006
PCNP	4	0.96233	0.96235	1	18314	0	0.98485	0.011962	0.031615	0.972792	608	3	0.98485
BEND3	4	0.014529	0.047452	0.881202	1001	2	-4.1719	0.012016	0.031748	0.974548	609	1	-4.1719
RRP12	3	0.54503	0.67338	1	13279	1	2.4009	0.012022	0.028987	0.964891	610	2	2.4009
ZBTB8OS	3	0.42608	0.5814	1	11576	2	-4.6123	0.012022	0.028987	0.964891	611	1	-4.6123
ZNF529	4	0.99715	0.99716	1	19042	0	1.5721	0.01206	0.031846	0.974548	612	3	1.5721
SEMA3C	4	0.94778	0.94784	1	18016	0	-1.089	0.012069	0.031868	0.974548	613	2	-1.089
NUDT16	4	0.47181	0.64867	1	12252	2	-1.2137	0.012073	0.031876	0.974548	614	2	-1.2137
ZC3HAV1L	4	0.65678	0.78937	1	14835	1	-1.0866	0.012123	0.032	0.974548	615	2	-1.0866
NGFRAP1	4	0.6806	0.80813	1	15164	1	1.605	0.012131	0.032019	0.974548	616	3	1.605
ADCK2	4	0.40725	0.60154	1	11329	1	1.3391	0.012163	0.032103	0.974548	617	3	1.3391
BEX4	4	0.95676	0.95677	1	18205	0	1.2434	0.012176	0.03213	0.974548	618	3	1.2434
C11orf96	4	0.042555	0.12536	0.932507	2518	3	-6.4521	0.012176	0.032131	0.974548	619	1	-6.4521
GALNT15	4	0.061528	0.17277	0.96493	3352	3	-6.4441	0.012283	0.032398	0.979532	620	1	-6.4441
KRT20	3	0.63559	0.71456	1	14529	1	2.399	0.012334	0.029509	0.964891	621	2	2.399
SELL	4	0.31786	0.53738	1	9985	2	-3.202	0.012337	0.032523	0.979658	622	1	-3.202
GPR27	4	0.74312	0.83138	1	15689	1	1.9157	0.012434	0.03274	0.979658	623	3	1.9157
TNFRSF13C	3	0.92788	0.92802	1	17664	0	2.2737	0.012458	0.029701	0.964891	624	2	2.2737
MAGED4B	4	0.50399	0.6727	1	12741	1	0.11242	0.01247	0.032817	0.979658	625	2	0.11242
ZNF727	4	0.32386	0.54156	1	10070	1	1.2348	0.012485	0.032854	0.979658	626	3	1.2348
GINS1	4	0.51083	0.67775	1	12804	1	1.7108	0.012501	0.032889	0.979658	627	3	1.7108
TPP2	4	0.29144	0.5071	1	9407	1	-0.49101	0.012531	0.032952	0.979658	628	2	-0.49101
SMIM20	4	0.51344	0.67968	1	12833	2	-2.8766	0.012551	0.033001	0.979658	629	1	-2.8766
ULBP2	4	0.71622	0.82242	1	15498	1	1.5585	0.012568	0.033038	0.979658	630	3	1.5585
NAPRT	4	0.70659	0.81935	1	15433	1	1.5348	0.01259	0.033092	0.979658	631	3	1.5348
SPTBN1	4	0.72452	0.82515	1	15553	1	-2.9489	0.012604	0.033131	0.979658	632	1	-2.9489
TRMT11	4	0.76273	0.8384	1	15827	1	1.3475	0.012754	0.03349	0.979658	633	3	1.3475
GP2	4	0.29949	0.51726	1	9554	3	-5.2056	0.012765	0.033523	0.979658	634	1	-5.2056
AMZ1	3	0.93856	0.93879	1	17849	0	-2.539	0.012765	0.030197	0.964891	635	1	-2.539
RGS10	4	0.53442	0.69533	1	13146	1	0.75205	0.012778	0.033558	0.979658	636	2	0.75205
PKHD1	3	0.53894	0.67089	1	13200	1	-0.22032	0.012805	0.030272	0.965661	637	1	-0.22032
ANKEF1	4	0.37005	0.57467	1	10774	2	-2.1235	0.012818	0.033644	0.979658	638	2	-2.1235
CUL4B	4	0.71972	0.82359	1	15516	1	1.1591	0.012824	0.033654	0.979658	639	2	1.1591
PAGE2	4	0.16715	0.33823	1	6384	1	1.2228	0.012861	0.033745	0.979658	640	3	1.2228
TIAM1	4	0.69057	0.81453	1	15325	1	1.1906	0.012919	0.033891	0.979658	641	3	1.1906
RASA4	4	0.45489	0.63616	1	12004	2	-3.5643	0.012925	0.033907	0.979658	642	1	-3.5643
ZDHHC4	4	0.28954	0.50467	1	9382	1	1.7488	0.012929	0.033917	0.979658	643	3	1.7488
COL6A5	4	0.42366	0.61349	1	11541	1	1.6702	0.012965	0.033995	0.979658	644	3	1.6702
MFRP	4	0.34364	0.55576	1	10345	2	-2.9062	0.012979	0.034034	0.979658	645	1	-2.9062
ACVR1	4	0.56594	0.7192	1	13571	1	1.0879	0.013014	0.034124	0.979658	646	2	1.0879
SPDL1	4	0.9537	0.95373	1	18149	0	0.80452	0.013021	0.034138	0.979658	647	2	0.80452
USP1	4	0.88383	0.89555	1	16999	1	1.579	0.013027	0.034149	0.979658	648	3	1.579
TCEAL3	4	0.86333	0.88343	1	16784	1	-2.8251	0.013032	0.034159	0.979658	649	1	-2.8251
ATP2A1	4	0.90504	0.90995	1	17301	1	-0.7905	0.013042	0.034176	0.979658	650	2	-0.7905
MDM2	3	0.49165	0.64659	1	12530	1	-1.2627	0.013046	0.030656	0.968208	651	1	-1.2627
CLPS	4	0.88895	0.89883	1	17094	1	1.2504	0.013053	0.034201	0.979658	652	3	1.2504
RNF144B	4	0.99762	0.99761	1	19049	0	1.1501	0.013072	0.034244	0.979658	653	3	1.1501
PPIAL4C	4	0.4919	0.66364	1	12566	2	-0.032593	0.013081	0.034263	0.979658	654	2	-0.032593
ANGPT4	4	0.17667	0.35196	1	6627	1	1.0027	0.013086	0.034275	0.979658	655	2	1.0027
TFPT	4	0.5785	0.7288	1	13764	1	1.6977	0.013095	0.034295	0.979658	656	3	1.6977
UGT1A10	4	0.59752	0.74341	1	14019	1	1.2493	0.013112	0.034336	0.979658	657	3	1.2493
ABI1	4	0.96805	0.96811	1	18421	0	1.6343	0.013118	0.034347	0.979658	658	3	1.6343
UTP3	4	0.45489	0.63616	1	11995	2	-3.4884	0.013139	0.034393	0.979658	659	1	-3.4884
EIF3G	3	0.23553	0.38557	1	8106	1	-3.4093	0.013166	0.030851	0.968208	660	1	-3.4093
CKAP2	4	0.39513	0.59275	1	11156	2	-3.7983	0.013192	0.034522	0.979658	661	1	-3.7983
OCM2	4	0.29949	0.51726	1	9584	3	-5.1471	0.013246	0.034653	0.979658	662	1	-5.1471
SLC35E2B	4	0.74312	0.83138	1	15679	1	1.7251	0.01328	0.034735	0.979658	663	3	1.7251
MYBBP1A	4	0.52483	0.68831	1	13021	2	-1.6456	0.013299	0.034784	0.979658	664	2	-1.6456
SETSIP	4	0.57226	0.72394	1	13664	1	1.5024	0.013343	0.034885	0.979658	665	3	1.5024
CHST1	4	0.51406	0.68015	1	12865	1	1.492	0.013346	0.034894	0.979658	666	3	1.492
PELI3	4	0.34779	0.55871	1	10410	2	-5.0407	0.013353	0.034914	0.979658	667	1	-5.0407
SLC22A8	4	0.96134	0.96132	1	18289	0	2.1118	0.013382	0.034982	0.979658	668	3	2.1118
GMIP	4	0.15847	0.32558	1	6157	3	-4.7955	0.013406	0.035041	0.979658	669	1	-4.7955
KMO	4	0.99498	0.995	1	18991	0	1.5543	0.013432	0.035098	0.979658	670	3	1.5543
PLCXD3	4	0.91137	0.91468	1	17384	1	1.6072	0.013456	0.035152	0.979658	671	3	1.6072
LTBR	4	0.25013	0.45341	1	8437	3	-5.1047	0.01346	0.035157	0.979658	672	1	-5.1047
MGAT5B	4	0.2859	0.50003	1	9278	1	1.5028	0.013469	0.035179	0.979658	673	2	1.5028
OPRK1	4	0.99091	0.99091	1	18904	0	1.3022	0.013492	0.035241	0.979658	674	3	1.3022
TPPP3	4	0.011768	0.038961	0.87293	829	2	-2.3927	0.013505	0.035273	0.979658	675	2	-2.3927
A1BG	3	0.88446	0.88455	1	17026	0	2.2778	0.013521	0.031438	0.970081	676	2	2.2778
TPT1	4	0.56366	0.71749	1	13533	2	-1.2708	0.013606	0.035517	0.980541	677	2	-1.2708
SLC22A25	4	0.92537	0.9263	1	17622	1	1.3803	0.013613	0.035536	0.980541	678	3	1.3803
GJB4	4	0.034102	0.10304	0.924302	2078	3	-6.5689	0.01362	0.035553	0.980541	679	1	-6.5689
LHX6	4	0.15429	0.31928	1	6035	1	0.43933	0.013642	0.035604	0.980541	680	2	0.43933
SPIRE1	4	0.85161	0.87698	1	16643	1	1.1417	0.013687	0.035719	0.980541	681	3	1.1417
OR52N2	4	0.79846	0.85246	1	16150	1	0.56617	0.013725	0.035818	0.980541	682	2	0.56617
MAP1LC3C	4	0.9725	0.97264	1	18525	0	-0.64102	0.013727	0.035821	0.980541	683	2	-0.64102
RNF130	4	0.94778	0.94784	1	18029	0	1.1374	0.013775	0.035936	0.980541	684	3	1.1374
ADRA1A	4	0.010294	0.034346	0.865554	746	3	-5.6643	0.013781	0.035947	0.980541	685	1	-5.6643
TICAM2	4	0.99522	0.99521	1	18996	0	1.4176	0.013887	0.036203	0.980541	686	3	1.4176
PTPDC1	4	0.31093	0.53156	1	9829	2	-0.99299	0.013929	0.036321	0.980541	687	2	-0.99299
ANAPC11	4	0.64975	0.7839	1	14727	2	-2.3801	0.013941	0.036346	0.980541	688	1	-2.3801
KLHL13	4	0.036615	0.10976	0.929217	2215	1	0.43136	0.013947	0.036356	0.980541	689	2	0.43136
CXADR	4	0.69057	0.81453	1	15324	1	1.5916	0.013958	0.036387	0.980541	690	3	1.5916
LMX1A	4	0.99539	0.99539	1	19001	0	1.3345	0.013972	0.036417	0.980541	691	3	1.3345
MMP26	4	0.4919	0.66364	1	12553	2	-1.866	0.013994	0.036471	0.980541	692	2	-1.866
CWC15	4	0.80151	0.85372	1	16182	1	1.7106	0.014013	0.036514	0.980541	693	3	1.7106
CXXC4	4	0.72948	0.82674	1	15590	1	1.5218	0.014017	0.036527	0.980541	694	3	1.5218
GALNT8	4	0.99295	0.99297	1	18945	0	1.5874	0.01402	0.036532	0.980541	695	3	1.5874
RPL19	3	0.57194	0.68487	1	13647	1	2.8511	0.014034	0.032288	0.977742	696	2	2.8511
ACAP1	4	0.62508	0.76476	1	14407	2	-3.1522	0.014048	0.036602	0.980541	697	1	-3.1522
AP5M1	4	0.53752	0.69764	1	13198	1	1.5037	0.014051	0.036608	0.980541	698	3	1.5037
KCNIP4	4	0.31993	0.53882	1	10012	2	-2.6833	0.014101	0.036734	0.980541	699	1	-2.6833
ID4	4	0.91963	0.92138	1	17535	1	1.1788	0.014116	0.036774	0.980541	700	3	1.1788
ITM2B	4	0.9417	0.94178	1	17913	0	1.7266	0.014147	0.036855	0.980541	701	3	1.7266
ABHD14A	4	0.88122	0.89391	1	16973	1	-1.2106	0.014155	0.036871	0.980541	702	1	-1.2106
CTSH	4	0.64381	0.77925	1	14664	1	1.8255	0.014156	0.036873	0.980541	703	3	1.8255
VWA5A	3	0.7879	0.80299	1	16049	1	-0.51055	0.01417	0.032517	0.979658	704	1	-0.51055
C17orf89	4	0.053159	0.15228	0.956836	2996	3	-6.4067	0.014208	0.036994	0.980541	705	1	-6.4067
STMN3	4	0.97923	0.97936	1	18660	0	1.7496	0.014237	0.037069	0.980541	706	3	1.7496
MKNK2	4	0.39417	0.59206	1	11133	1	-0.25782	0.01424	0.037079	0.980541	707	2	-0.25782
CHST13	4	0.21689	0.40867	1	7635	2	-3.8167	0.014261	0.03714	0.980541	708	1	-3.8167
WDR45	4	0.42103	0.61154	1	11508	1	0.54656	0.014306	0.037247	0.980541	709	2	0.54656
MAP2K2	4	0.94373	0.94383	1	17951	0	-0.47087	0.014388	0.037443	0.980541	710	2	-0.47087
BARD1	3	0.42325	0.57862	1	11525	2	-4.8414	0.01441	0.032914	0.979658	711	1	-4.8414
MAF1	4	0.56366	0.71749	1	13544	2	-4.4352	0.014422	0.037529	0.980541	712	1	-4.4352
CRHBP	3	0.84419	0.84651	1	16552	1	-0.24709	0.01445	0.032992	0.979658	713	1	-0.24709
S100A7A	4	0.31321	0.53407	1	9920	1	1.3811	0.014466	0.037634	0.980541	714	3	1.3811
SASH3	4	0.14581	0.30664	0.99859	5832	2	-3.0355	0.014475	0.037654	0.980541	715	1	-3.0355
CLEC2B	4	0.99796	0.99796	1	19055	0	1.6036	0.014518	0.037759	0.980541	716	3	1.6036
NUS1	2	0.98548	0.98553	1	18793	0	2.1999	0.014525	0.027212	0.964891	717	2	2.1999
GAS7	4	0.99098	0.99098	1	18907	0	1.2905	0.014529	0.037788	0.980541	718	3	1.2905
MAOA	4	0.40597	0.60059	1	11302	2	-1.4836	0.014536	0.037808	0.980541	719	2	-1.4836
METTL20	4	0.12943	0.28195	0.986075	5422	1	1.3258	0.014558	0.037857	0.980541	720	2	1.3258
CRIP1	4	0.17414	0.34838	1	6558	1	1.0391	0.014581	0.037904	0.980541	721	3	1.0391
FRMD4B	2	0.8849	0.8848	1	17029	0	2.0263	0.014595	0.02733	0.964891	722	1	2.0263
GPR31	4	0.99819	0.99819	1	19061	0	1.8036	0.014624	0.038007	0.980541	723	3	1.8036
ACOT9	4	0.26152	0.46854	1	8683	1	1.2305	0.014634	0.03803	0.980541	724	3	1.2305
CCNC	4	0.88122	0.89391	1	16964	1	-2.3076	0.014635	0.038034	0.980541	725	1	-2.3076
TSPYL1	4	0.9725	0.97264	1	18521	0	1.0835	0.014655	0.03808	0.980541	726	3	1.0835
ZNF134	4	0.99279	0.99281	1	18938	0	1.5019	0.014662	0.038106	0.980541	727	3	1.5019
LRFN2	4	0.99799	0.99798	1	19057	0	1.0353	0.014669	0.038124	0.980541	728	3	1.0353
GK2	4	0.97495	0.97511	1	18581	0	1.0783	0.014687	0.038176	0.980541	729	3	1.0783
CLEC10A	4	0.53107	0.6929	1	13076	2	-1.8638	0.014689	0.038178	0.980541	730	1	-1.8638
REXO1	4	0.89972	0.90613	1	17225	1	1.3267	0.014712	0.038227	0.980541	731	3	1.3267
GAL3ST3	4	0.3438	0.55589	1	10383	2	-3.9469	0.014742	0.038299	0.980541	732	1	-3.9469
TNFRSF11A	4	0.72948	0.82674	1	15585	1	1.4844	0.014751	0.038316	0.980541	733	3	1.4844
CBX2	4	0.22863	0.42452	1	7904	1	-0.86236	0.014822	0.038505	0.980541	734	1	-0.86236
RBM10	4	0.61313	0.75549	1	14206	1	1.3792	0.01488	0.038659	0.980541	735	2	1.3792
FBXL6	4	0.21304	0.40333	1	7544	2	-1.53	0.014891	0.038693	0.980541	736	2	-1.53
NACAD	4	0.61323	0.75557	1	14249	2	-2.0078	0.014902	0.038722	0.980541	737	2	-2.0078
POM121C	4	0.48395	0.65771	1	12430	1	1.4492	0.01491	0.038742	0.980541	738	3	1.4492
CIRH1A	4	0.98455	0.98454	1	18775	0	0.65183	0.014921	0.038767	0.980541	739	2	0.65183
CBWD2	4	0.56366	0.71749	1	13538	2	-4.6894	0.014956	0.038852	0.980541	740	1	-4.6894
ZNF678	4	0.98031	0.98039	1	18683	0	1.0729	0.01506	0.039111	0.980541	741	3	1.0729
RNGTT	4	0.89415	0.90227	1	17151	1	-0.43583	0.015063	0.039121	0.980541	742	2	-0.43583
LOC729159	4	0.17349	0.34742	1	6536	3	-4.4409	0.015116	0.039245	0.980541	743	1	-4.4409
ZNF878	4	0.16295	0.3321	1	6265	2	-1.5074	0.015121	0.039261	0.980541	744	2	-1.5074
MRGPRG	4	0.39146	0.59006	1	11098	1	1.5925	0.015139	0.039307	0.980541	745	3	1.5925
ZNF891	4	0.091225	0.22252	0.971209	4313	3	-6.1395	0.015169	0.039367	0.980541	746	1	-6.1395
PASK	4	0.98865	0.98865	1	18859	0	1.6886	0.015212	0.039459	0.980541	747	3	1.6886
TMEM176B	4	0.48064	0.65525	1	12370	2	-2.6923	0.015276	0.039601	0.980541	748	1	-2.6923
ADAM33	4	0.53442	0.69533	1	13128	1	0.9067	0.015319	0.03971	0.980541	749	2	0.9067
COL19A1	4	0.87624	0.89094	1	16930	1	-0.22838	0.01533	0.03973	0.980541	750	1	-0.22838
SH2D1A	4	0.9908	0.99079	1	18900	0	1.3219	0.015345	0.039773	0.980541	751	2	1.3219
SLBP	4	0.97069	0.97076	1	18478	0	0.01709	0.015383	0.039858	0.980541	752	1	0.01709
COL9A1	4	0.35692	0.56523	1	10565	2	-1.309	0.015425	0.039966	0.980541	753	2	-1.309
FEZ1	4	0.98366	0.98365	1	18748	0	0.97549	0.015433	0.039981	0.980541	754	2	0.97549
DTX2	4	0.31544	0.53566	1	9954	2	-3.1358	0.015436	0.039989	0.980541	755	1	-3.1358
S100A4	4	0.15537	0.32089	1	6087	1	1.1248	0.015443	0.040004	0.980541	756	3	1.1248
LMOD2	4	0.55919	0.7141	1	13491	1	1.0743	0.015479	0.040097	0.980541	757	3	1.0743
PDCL	4	0.73971	0.83017	1	15657	1	1.8141	0.015487	0.040119	0.980541	758	3	1.8141
TIMM21	4	0.60682	0.75062	1	14114	2	-0.27116	0.015543	0.040252	0.980541	759	2	-0.27116
NOS2	4	0.72299	0.82465	1	15536	1	0.5527	0.015548	0.040265	0.980541	760	2	0.5527
ORAI2	3	0.31663	0.47022	1	9973	1	-0.55262	0.015573	0.034807	0.979658	761	1	-0.55262
TTC39C	4	0.73648	0.82905	1	15639	1	1.5192	0.015581	0.040334	0.980541	762	3	1.5192
FLRT3	4	0.02921	0.089586	0.917463	1817	3	-6.7055	0.015596	0.040379	0.980541	763	1	-6.7055
FADS2	4	0.5441	0.70266	1	13259	2	-0.86508	0.015613	0.040422	0.980541	764	2	-0.86508
KIF1C	4	0.94778	0.94784	1	18015	0	-1.9765	0.01565	0.04051	0.980541	765	1	-1.9765
CREB3L3	4	0.95451	0.95453	1	18159	0	1.1462	0.015691	0.040611	0.980541	766	3	1.1462
RPS7	3	0.91281	0.91292	1	17418	0	-0.51129	0.015693	0.03502	0.979658	767	1	-0.51129
CITED4	4	0.75315	0.83496	1	15766	1	-0.58846	0.015713	0.040661	0.980541	768	2	-0.58846
SLC2A1	4	0.19104	0.37246	1	6997	2	-3.6242	0.01573	0.040699	0.980541	769	1	-3.6242
PRPF6	4	0.95764	0.95766	1	18219	0	0.92962	0.015748	0.040747	0.980541	770	3	0.92962
ATP1B4	4	0.10568	0.24521	0.977779	4713	1	1.9485	0.015748	0.040747	0.980541	771	3	1.9485
DCUN1D3	4	0.9206	0.92221	1	17547	1	1.3422	0.015783	0.040842	0.980541	772	3	1.3422
NLRP11	4	0.25135	0.45505	1	8485	1	-0.62991	0.015802	0.040884	0.980541	773	2	-0.62991
SNX31	4	0.4874	0.66027	1	12496	1	-1.4885	0.01581	0.0409	0.980541	774	2	-1.4885
LRRC55	4	0.94689	0.94695	1	18002	0	1.5546	0.015824	0.040927	0.980541	775	3	1.5546
EXOC1	4	0.88383	0.89555	1	17012	1	1.9304	0.015839	0.040965	0.980541	776	3	1.9304
VPS36	4	0.35692	0.56523	1	10558	1	-4.144	0.015863	0.041035	0.980541	777	1	-4.144
PIWIL4	4	0.3438	0.55589	1	10372	2	-1.6689	0.01591	0.041149	0.980541	778	2	-1.6689
UTP15	3	0.94174	0.94189	1	17924	0	0.23726	0.015974	0.035476	0.980541	779	1	0.23726
CRABP1	4	0.49029	0.66239	1	12519	1	0.97209	0.015976	0.041323	0.980541	780	3	0.97209
ESYT2	4	0.25488	0.45972	1	8572	3	-5.3956	0.015997	0.041366	0.980541	781	1	-5.3956
TMEM176A	4	0.85027	0.87633	1	16625	1	1.3934	0.016022	0.041423	0.980541	782	3	1.3934
SGCZ	4	0.63717	0.77403	1	14548	1	1.1535	0.016022	0.041423	0.980541	783	3	1.1535
ZNF563	4	0.2082	0.3966	1	7421	2	-1.5841	0.01605	0.041498	0.980541	784	2	-1.5841
RAD52	4	0.97198	0.97213	1	18508	0	1.4764	0.016077	0.041564	0.980541	785	2	1.4764
C6orf1	4	0.013887	0.045452	0.881202	954	1	0.96875	0.016119	0.041658	0.980541	786	3	0.96875
GIMAP7	4	0.26152	0.46854	1	8684	1	1.3642	0.016127	0.041676	0.980541	787	3	1.3642
OR5H2	4	0.0035128	0.012376	0.767282	298	2	-3.2797	0.01613	0.041685	0.980541	788	2	-3.2797
GP1BA	3	0.7879	0.80299	1	16058	1	1.349	0.016174	0.035807	0.980541	789	2	1.349
BNC1	4	0.236	0.43454	1	8114	2	-2.2728	0.016183	0.041808	0.980541	790	2	-2.2728
LPA	3	0.88755	0.88766	1	17070	0	2.0469	0.016197	0.035847	0.980541	791	2	2.0469
CACNA1F	4	0.23018	0.42662	1	7984	2	-0.50797	0.016206	0.041863	0.980541	792	2	-0.50797
PANK3	4	0.32386	0.54156	1	10067	2	-1.8038	0.01623	0.041915	0.980541	793	2	-1.8038
C1QL1	4	0.94778	0.94784	1	18018	0	1.5726	0.016236	0.041928	0.980541	794	3	1.5726
TJP2	4	0.31218	0.53314	1	9890	3	-3.4478	0.016237	0.041929	0.980541	795	1	-3.4478
SMOC2	4	0.26332	0.47096	1	8723	2	-1.2326	0.016241	0.041943	0.980541	796	2	-1.2326
SAP25	4	0.9537	0.95373	1	18138	0	1.4361	0.016284	0.042065	0.980541	797	3	1.4361
TMEM217	4	0.78601	0.84739	1	16018	1	-0.1867	0.01629	0.042081	0.980541	798	2	-0.1867
ZSCAN1	4	0.21293	0.40317	1	7527	1	1.1668	0.016298	0.042099	0.980541	799	3	1.1668
ARMT1	4	0.96599	0.96604	1	18380	0	1.3846	0.016339	0.042189	0.980541	800	3	1.3846
DYNLRB1	4	0.81717	0.86047	1	16295	1	-0.49603	0.016343	0.042196	0.980541	801	2	-0.49603
GUCY2F	4	0.30579	0.52509	1	9756	3	-4.2658	0.016343	0.042196	0.980541	802	1	-4.2658
UTP20	4	0.5471	0.70493	1	13340	1	-2.9541	0.016423	0.042382	0.980541	803	1	-2.9541
MYT1L	4	0.27656	0.48798	1	9032	3	-3.7197	0.016423	0.042382	0.980541	804	1	-3.7197
CHEK2	4	0.67071	0.80029	1	15047	1	1.4461	0.016426	0.042388	0.980541	805	3	1.4461
CYP4Z1	4	0.98639	0.98635	1	18807	0	1.2817	0.016426	0.042388	0.980541	806	3	1.2817
NKIRAS1	4	0.46291	0.64208	1	12104	1	1.4071	0.016449	0.042443	0.980541	807	3	1.4071
SLC51A	4	0.67157	0.80101	1	15057	2	-0.049605	0.016481	0.042516	0.980541	808	2	-0.049605
NANP	4	0.89146	0.9005	1	17113	1	-0.43633	0.016503	0.042567	0.980541	809	1	-0.43633
MLANA	4	0.4874	0.66027	1	12499	2	-3.5207	0.016557	0.042706	0.980541	810	1	-3.5207
RANBP2	4	0.63127	0.76954	1	14475	2	-0.70678	0.016607	0.042827	0.980541	811	2	-0.70678
R3HDM2	4	0.86464	0.88417	1	16793	1	-1.4665	0.01661	0.042833	0.980541	812	1	-1.4665
CYP4B1	4	0.97867	0.97882	1	18648	0	1.0207	0.01662	0.042853	0.980541	813	3	1.0207
NLN	4	0.82799	0.86543	1	16382	1	0.127	0.016623	0.042863	0.980541	814	2	0.127
SLC25A3	4	0.17535	0.35011	1	6597	3	-5.5563	0.016663	0.04295	0.980541	815	1	-5.5563
PRPF31	4	0.98097	0.98101	1	18700	0	1.7635	0.016686	0.043	0.980541	816	3	1.7635
SENP6	4	0.98275	0.98278	1	18733	0	1.2131	0.016717	0.043075	0.980541	817	3	1.2131
PPP1CC	4	0.84763	0.87499	1	16590	1	1.1417	0.01674	0.043131	0.980541	818	3	1.1417
TRIM49D1	4	0.89146	0.9005	1	17115	1	-0.15352	0.01677	0.043203	0.980541	819	1	-0.15352
SDE2	3	0.9524	0.95269	1	18116	0	2.2329	0.016775	0.03681	0.980541	820	2	2.2329
GLB1L	4	0.54072	0.70009	1	13208	1	0.69511	0.016797	0.043262	0.980541	821	2	0.69511
HES4	4	0.26199	0.46916	1	8705	2	-4.496	0.016823	0.043318	0.980541	822	1	-4.496
FUT2	4	0.87203	0.88845	1	16879	1	1.2026	0.016853	0.04338	0.980541	823	3	1.2026
KIAA1549L	3	0.099843	0.22049	0.970851	4577	2	-6.5114	0.016855	0.036931	0.980541	824	1	-6.5114
TBC1D8B	4	0.97173	0.97185	1	18498	0	1.5188	0.016876	0.043439	0.980541	825	3	1.5188
C3orf38	4	0.050871	0.14653	0.954823	2886	3	-6.287	0.016877	0.043441	0.980541	826	1	-6.287
ZSCAN23	4	0.5441	0.70266	1	13263	1	1.6082	0.016893	0.043473	0.980541	827	2	1.6082
PAN2	4	0.53664	0.69701	1	13173	2	-1.25	0.016925	0.04355	0.980541	828	2	-1.25
OR6Q1	4	0.045876	0.13391	0.945235	2661	3	-5.9918	0.01693	0.043564	0.980541	829	1	-5.9918
ACSM4	4	0.72299	0.82465	1	15534	1	1.2819	0.017012	0.04378	0.980541	830	2	1.2819
DPRX	4	0.80486	0.85513	1	16197	1	1.5236	0.017023	0.04381	0.980541	831	3	1.5236
PQBP1	4	0.018182	0.058391	0.88844	1232	2	-2.0345	0.01706	0.043897	0.980541	832	2	-2.0345
SCN9A	4	0.31555	0.53574	1	9967	1	1.1031	0.017085	0.043947	0.980541	833	3	1.1031
DNAJB9	4	0.14543	0.30608	0.998569	5826	3	-5.469	0.01709	0.043959	0.980541	834	1	-5.469
USE1	4	0.24223	0.44281	1	8256	2	-1.869	0.017133	0.044069	0.980541	835	2	-1.869
ENTPD8	4	0.87351	0.88933	1	16899	1	-0.51282	0.017143	0.044089	0.980541	836	2	-0.51282
GPD1	4	0.58138	0.73101	1	13779	2	-0.13231	0.017149	0.044098	0.980541	837	2	-0.13231
CLIC6	4	0.96383	0.96389	1	18339	0	1.6591	0.017157	0.044119	0.980541	838	2	1.6591
TSC22D1	4	0.96513	0.96518	1	18359	0	1.644	0.017165	0.044136	0.980541	839	3	1.644
SPPL2C	4	0.70341	0.81836	1	15406	1	0.70705	0.017197	0.044218	0.980541	840	2	0.70705
TMEM86A	4	0.47645	0.65218	1	12341	2	-2.3685	0.01725	0.044345	0.980541	841	1	-2.3685
MCF2L	4	0.1335	0.28811	0.989499	5514	2	-2.028	0.017269	0.044394	0.980541	842	2	-2.028
CCDC65	4	0.43009	0.61818	1	11631	2	-1.3965	0.017321	0.044518	0.980541	843	2	-1.3965
PLEKHF1	4	0.9102	0.91381	1	17363	1	1.248	0.017321	0.044518	0.980541	844	2	1.248
SFTA3	4	0.35005	0.56037	1	10451	1	1.2068	0.017381	0.044653	0.980541	845	3	1.2068
BLK	4	0.96209	0.9621	1	18310	0	1.0909	0.017422	0.044752	0.980541	846	3	1.0909
GRID1	4	0.93522	0.93535	1	17796	1	1.416	0.01744	0.044788	0.980541	847	3	1.416
C1orf127	4	0.96433	0.9644	1	18351	0	0.93867	0.017452	0.044817	0.980541	848	3	0.93867
DSPP	4	0.090935	0.22201	0.971209	4305	1	1.0272	0.017516	0.044961	0.980541	849	2	1.0272
INSM2	4	0.10486	0.24391	0.977779	4703	3	-6.1767	0.017516	0.044961	0.980541	850	1	-6.1767
NTN5	3	0.74503	0.77473	1	15702	1	2.466	0.017553	0.038076	0.980541	851	2	2.466
MADD	4	0.85328	0.8779	1	16654	1	1.1373	0.017574	0.045098	0.980541	852	3	1.1373
MAGEB17	4	0.98752	0.9875	1	18835	0	1.6392	0.017625	0.0452	0.980541	853	3	1.6392
ADAMTSL4	4	0.9417	0.94178	1	17909	0	1.2259	0.017645	0.04524	0.980541	854	3	1.2259
MMS22L	4	0.22144	0.41474	1	7735	2	-1.839	0.017718	0.045406	0.980541	855	2	-1.839
MRGPRX2	4	0.18423	0.36276	1	6824	1	1.6909	0.017758	0.045495	0.980541	856	3	1.6909
PKIB	4	0.60377	0.74829	1	14093	1	1.2556	0.017758	0.045495	0.980541	857	3	1.2556
FAM84B	4	0.97069	0.97076	1	18481	0	-0.1763	0.017783	0.045555	0.980541	858	2	-0.1763
FRRS1L	4	0.93184	0.93213	1	17737	1	1.3027	0.01779	0.045573	0.980541	859	3	1.3027
TLR4	4	0.63079	0.76918	1	14439	1	0.88925	0.017796	0.045586	0.980541	860	2	0.88925
NTNG1	4	0.96584	0.96588	1	18377	0	1.0463	0.017814	0.045631	0.980541	861	3	1.0463
BMX	4	0.9896	0.98957	1	18875	0	1.1842	0.017827	0.045656	0.980541	862	3	1.1842
DEFB112	4	0.93522	0.93535	1	17804	1	-0.10765	0.017836	0.045675	0.980541	863	1	-0.10765
RNF133	4	0.2859	0.50003	1	9279	1	1.7287	0.017867	0.045737	0.980541	864	3	1.7287
YY2	4	0.083623	0.21017	0.969295	4084	1	-0.95447	0.017878	0.045762	0.980541	865	2	-0.95447
ARHGEF3	4	0.0092566	0.031085	0.850487	687	1	-0.54183	0.017889	0.045787	0.980541	866	1	-0.54183
VWA2	3	0.47512	0.63027	1	12292	2	-4.5395	0.017896	0.038651	0.980541	867	1	-4.5395
DCAF16	4	0.32836	0.54483	1	10142	1	0.33332	0.017919	0.045861	0.980541	868	2	0.33332
GNAT3	4	0.62712	0.76632	1	14424	1	-0.65817	0.017943	0.045917	0.980541	869	2	-0.65817
ZNF208	4	0.30851	0.52851	1	9806	1	1.31	0.017968	0.045973	0.980541	870	2	1.31
ASIC4	4	0.89415	0.90227	1	17155	1	1.3243	0.017988	0.046019	0.980541	871	2	1.3243
SLC39A1	4	0.80486	0.85513	1	16198	1	-3.3164	0.017996	0.046033	0.980541	872	1	-3.3164
PDZD4	4	0.92331	0.92455	1	17587	1	0.91897	0.018049	0.046162	0.980541	873	3	0.91897
RCE1	4	0.14139	0.30007	0.993682	5712	1	1.066	0.0181	0.046287	0.980541	874	3	1.066
OVCA2	4	0.94373	0.94383	1	17945	0	-0.8818	0.018103	0.046295	0.980541	875	2	-0.8818
VANGL1	3	0.89207	0.89215	1	17124	0	2.0476	0.018105	0.038976	0.980541	876	2	2.0476
SMYD3	4	0.80318	0.85444	1	16183	1	1.0587	0.018144	0.046392	0.980541	877	3	1.0587
CCT8L2	4	0.94373	0.94383	1	17941	0	-1.9309	0.018156	0.046421	0.980541	878	1	-1.9309
PSMB11	4	0.9725	0.97264	1	18515	0	1.0984	0.018178	0.04647	0.980541	879	3	1.0984
UXT	3	0.90498	0.90506	1	17290	0	-1.4878	0.018196	0.039124	0.980541	880	1	-1.4878
SAFB2	4	0.095999	0.23011	0.974676	4457	2	-3.9327	0.018209	0.046537	0.980541	881	1	-3.9327
TSEN54	4	0.89415	0.90227	1	17146	1	1.3529	0.018223	0.046574	0.980541	882	2	1.3529
HLA-DRA	4	0.64054	0.77667	1	14601	1	0.89691	0.018237	0.046608	0.980541	883	3	0.89691
SNRNP35	4	0.051988	0.14933	0.956628	2933	1	1.1855	0.018259	0.046652	0.980541	884	3	1.1855
FOXD3	4	0.26548	0.47373	1	8790	3	-3.7682	0.018262	0.046662	0.980541	885	1	-3.7682
TMBIM4	4	0.98141	0.98143	1	18706	0	0.67313	0.018316	0.046793	0.980541	886	2	0.67313
ZNF175	4	0.61669	0.75826	1	14270	1	1.407	0.018317	0.046801	0.980541	887	3	1.407
MAMDC4	3	0.96378	0.96401	1	18338	0	2.3778	0.018353	0.039374	0.980541	888	2	2.3778
FYB	4	0.88636	0.89717	1	17057	1	-1.3194	0.018369	0.046916	0.980541	889	2	-1.3194
GALNT7	4	0.10657	0.2466	0.977779	4751	1	1.401	0.01837	0.046918	0.980541	890	3	1.401
KMT2A	4	0.20133	0.38689	1	7248	2	-2.9628	0.018422	0.047055	0.980541	891	1	-2.9628
LPAR2	4	0.43107	0.61885	1	11646	1	1.9254	0.018429	0.047071	0.980541	892	3	1.9254
OGFOD3	4	0.91491	0.9175	1	17453	1	1.3216	0.018431	0.047076	0.980541	893	3	1.3216
UCN	4	0.92427	0.92537	1	17614	1	-2.25	0.018475	0.047181	0.980541	894	1	-2.25
RPS17	4	0.90504	0.90995	1	17305	1	-2.5466	0.018529	0.047305	0.980541	895	1	-2.5466
GRIFIN	4	0.20124	0.38677	1	7221	2	-1.4828	0.018537	0.047327	0.980541	896	2	-1.4828
NUP214	2	0.71245	0.71349	1	15461	1	-0.17689	0.018558	0.034367	0.979658	897	1	-0.17689
ZKSCAN4	4	0.2859	0.50003	1	9275	2	-1.6922	0.018609	0.047485	0.980541	898	2	-1.6922
SYPL2	4	0.85895	0.88094	1	16716	1	-3.4	0.018688	0.047675	0.980541	899	1	-3.4
PPP1R1B	4	0.99674	0.99677	1	19033	0	0.98823	0.018699	0.047693	0.980541	900	3	0.98823
LMAN1	4	0.88636	0.89717	1	17051	1	0.963	0.01873	0.047757	0.980541	901	3	0.963
FASN	4	0.17667	0.35196	1	6626	2	-2.7843	0.018742	0.047779	0.980541	902	2	-2.7843
UBE2A	2	0.52349	0.55981	1	12979	1	-0.77561	0.018746	0.034705	0.979658	903	1	-0.77561
USP15	4	0.83534	0.86897	1	16474	1	1.0837	0.018758	0.047814	0.980541	904	3	1.0837
PTH1R	4	0.030535	0.093288	0.917463	1885	1	1.3346	0.018762	0.047823	0.980541	905	3	1.3346
CLGN	4	0.52845	0.69098	1	13058	2	-3.6761	0.018795	0.04789	0.980541	906	1	-3.6761
IQSEC3	4	0.051495	0.14811	0.956628	2916	1	1.0407	0.018812	0.047931	0.980541	907	3	1.0407
MITD1	4	0.99359	0.99362	1	18957	0	1.1607	0.018828	0.047966	0.980541	908	3	1.1607
TBC1D15	4	0.48395	0.65771	1	12438	1	0.94838	0.018888	0.048104	0.980541	909	3	0.94838
KCNIP1	3	0.49776	0.65268	1	12646	1	1.0299	0.018896	0.040313	0.980541	910	2	1.0299
STOX2	4	0.40144	0.59738	1	11223	2	-1.4545	0.018896	0.048119	0.980541	911	2	-1.4545
SSTR5	4	0.55801	0.7132	1	13441	2	-1.6716	0.018901	0.048134	0.980541	912	2	-1.6716
ANXA8L1	3	0.58165	0.68919	1	13824	1	2.339	0.018944	0.040392	0.980541	913	2	2.339
GFOD2	4	0.91963	0.92138	1	17542	1	0.84322	0.018955	0.048262	0.980541	914	2	0.84322
GOLGA6L1	1	0.981	0.98106	1	18702	0	4.2268	0.019003	0.018969	0.955039	915	1	4.2268
SPRR1A	4	0.82944	0.86613	1	16399	1	1.2636	0.019004	0.048379	0.980541	916	3	1.2636
PTPRG	4	0.9417	0.94178	1	17917	0	-0.17939	0.019006	0.048383	0.980541	917	2	-0.17939
ACSM1	4	0.28803	0.50276	1	9334	3	-4.6105	0.019008	0.048391	0.980541	918	1	-4.6105
LOC100287036	4	0.012256	0.04047	0.87293	865	1	0.31848	0.019039	0.048467	0.980541	919	2	0.31848
RNF141	4	0.44255	0.62717	1	11793	1	1.0172	0.01906	0.048524	0.980541	920	3	1.0172
CHCHD5	4	0.31115	0.53184	1	9844	2	-2.032	0.019061	0.048526	0.980541	921	2	-2.032
ASPHD1	4	0.84763	0.87499	1	16595	1	1.0349	0.019077	0.048561	0.980541	922	2	1.0349
PUS10	4	0.51718	0.68252	1	12893	2	-0.45084	0.019114	0.048646	0.980541	923	2	-0.45084
CMTM5	4	0.97415	0.9743	1	18564	0	1.4709	0.019143	0.048708	0.980541	924	3	1.4709
HAAO	3	0.88267	0.88274	1	16995	0	2.26	0.01917	0.040753	0.980541	925	2	2.26
PEBP1	4	0.96883	0.9689	1	18444	0	2.0435	0.019176	0.04879	0.980541	926	3	2.0435
PSPC1	4	0.94778	0.94784	1	18013	0	1.1587	0.019216	0.048888	0.980541	927	2	1.1587
LAG3	4	0.99706	0.99708	1	19040	0	1.2244	0.01925	0.048976	0.980541	928	3	1.2244
HDAC8	4	0.99798	0.99798	1	19056	0	1.3046	0.019264	0.049007	0.980541	929	3	1.3046
H2AFB3	4	0.95764	0.95766	1	18229	0	-3.5962	0.019274	0.049036	0.980541	930	1	-3.5962
GYG2	4	0.95485	0.95488	1	18170	0	1.4701	0.019287	0.049076	0.980541	931	3	1.4701
TPRG1	4	0.21304	0.40333	1	7542	2	-3.6338	0.01938	0.049311	0.980541	932	1	-3.6338
OR51F1	4	0.81412	0.85911	1	16273	1	1.2324	0.019423	0.049408	0.980541	933	3	1.2324
RUFY1	4	0.55019	0.70726	1	13357	1	-0.54011	0.019432	0.049428	0.980541	934	2	-0.54011
SULF2	4	0.2082	0.3966	1	7413	2	-0.51858	0.019434	0.049432	0.980541	935	2	-0.51858
DKK4	4	0.30679	0.52637	1	9769	1	1.1607	0.019444	0.049455	0.980541	936	3	1.1607
MRPL43	4	0.92664	0.92744	1	17638	1	-0.47142	0.019445	0.049457	0.980541	937	2	-0.47142
PIP	4	0.00040498	0.0014822	0.55473	51	2	-3.1731	0.019462	0.049499	0.980541	938	2	-3.1731
LONRF2	4	0.079265	0.20307	0.969295	3926	1	-1.3488	0.019487	0.04955	0.980541	939	1	-1.3488
CHCHD6	4	0.99194	0.99196	1	18924	0	1.139	0.019499	0.049579	0.980541	940	3	1.139
CAT	4	0.80151	0.85372	1	16169	1	1.2703	0.019529	0.049643	0.980541	941	3	1.2703
PRC1	3	0.16207	0.30721	0.99859	6259	1	2.488	0.019529	0.041314	0.980541	942	2	2.488
LONRF1	4	0.7262	0.8257	1	15569	1	1.3021	0.019543	0.049673	0.980541	943	2	1.3021
ROM1	4	0.37241	0.57635	1	10812	1	1.5021	0.019554	0.049694	0.980541	944	3	1.5021
OR2B6	4	0.23953	0.43924	1	8173	2	-1.2847	0.019556	0.049698	0.980541	945	2	-1.2847
CBLC	4	0.71291	0.82136	1	15464	1	1.3416	0.019558	0.049703	0.980541	946	3	1.3416
SIVA1	4	0.21552	0.40675	1	7599	1	-0.5136	0.019593	0.049784	0.980541	947	1	-0.5136
SLC6A4	4	0.31544	0.53566	1	9948	2	-1.9104	0.01965	0.049914	0.980541	948	2	-1.9104
ENOPH1	4	0.64699	0.78174	1	14676	1	0.17557	0.019658	0.049938	0.980541	949	2	0.17557
NNAT	4	0.83534	0.86897	1	16471	1	0.17828	0.019726	0.050106	0.980541	950	2	0.17828
FAM196A	4	0.57526	0.72628	1	13710	2	-1.5022	0.019752	0.050165	0.980541	951	2	-1.5022
HIST1H2AD	4	0.2198	0.41253	1	7705	3	-4.9851	0.019753	0.050167	0.980541	952	1	-4.9851
NUDT13	4	0.91731	0.91944	1	17474	1	-0.66086	0.019761	0.050181	0.980541	953	2	-0.66086
POLR3H	4	0.9595	0.95952	1	18262	0	-0.41146	0.019786	0.050252	0.980541	954	2	-0.41146
ACP6	4	0.12387	0.27345	0.98119	5275	2	-3.5292	0.019806	0.050296	0.980541	955	1	-3.5292
PRR9	4	0.15201	0.31585	1	5985	1	1.2142	0.019838	0.050371	0.980541	956	2	1.2142
RABGAP1L	4	0.55616	0.71178	1	13428	1	0.87201	0.019853	0.050416	0.980541	957	3	0.87201
ANKRD11	4	0.70824	0.81987	1	15434	1	0.66171	0.019859	0.050431	0.980541	958	2	0.66171
KRTAP10-5	4	0.54072	0.70009	1	13212	1	1.3031	0.019863	0.050437	0.980541	959	2	1.3031
UCMA	4	0.42855	0.6171	1	11604	1	1.7879	0.01994	0.050638	0.980541	960	3	1.7879
CTAG2	4	0.94373	0.94383	1	17955	0	0.97734	0.019945	0.050646	0.980541	961	3	0.97734
RCN2	4	0.57518	0.72622	1	13689	1	-0.35839	0.019958	0.050679	0.980541	962	2	-0.35839
CRTAP	4	0.35005	0.56037	1	10442	1	-1.6525	0.019966	0.050696	0.980541	963	1	-1.6525
KHSRP	4	0.50251	0.67162	1	12720	2	-4.6259	0.020019	0.050809	0.980541	964	1	-4.6259
PLD4	4	0.29245	0.50835	1	9426	2	-2.9524	0.020072	0.050935	0.980541	965	1	-2.9524
CD164L2	4	0.41828	0.60955	1	11472	1	1.1238	0.020077	0.050948	0.980541	966	3	1.1238
DNAJB2	4	0.90908	0.91297	1	17345	1	-0.34773	0.020125	0.05107	0.980541	967	2	-0.34773
UBIAD1	4	0.94373	0.94383	1	17953	0	1.1311	0.020135	0.051095	0.980541	968	3	1.1311
CDC42BPG	4	0.99702	0.99704	1	19038	0	1.4934	0.020142	0.051109	0.980541	969	3	1.4934
ZNF709	4	0.99134	0.99137	1	18911	0	0.88946	0.020176	0.051187	0.980541	970	3	0.88946
MAGEA5	4	0.74312	0.83138	1	15685	1	0.063579	0.020178	0.051189	0.980541	971	2	0.063579
C9orf173	4	0.66023	0.79202	1	14866	1	1.1319	0.020194	0.051224	0.980541	972	3	1.1319
PRRT4	4	0.7595	0.83723	1	15817	1	0.97655	0.020241	0.051334	0.980541	973	3	0.97655
CXorf36	4	0.048658	0.14092	0.94944	2787	2	-2.3903	0.020334	0.051532	0.980541	974	2	-2.3903
PQLC2	3	0.24148	0.39182	1	8241	2	-3.7665	0.020335	0.042697	0.980541	975	1	-3.7665
TP53AIP1	3	0.20414	0.35259	1	7328	2	-5.9343	0.020375	0.042764	0.980541	976	1	-5.9343
GRHL1	4	0.97191	0.97205	1	18505	0	1.1738	0.020384	0.051647	0.980541	977	3	1.1738
ACER1	4	0.12784	0.27952	0.983339	5378	2	-4.2978	0.020391	0.051665	0.980541	978	1	-4.2978
FBXL14	4	0.89972	0.90613	1	17238	1	0.34558	0.020391	0.051665	0.980541	979	2	0.34558
MAGEA9	4	0.55324	0.70954	1	13410	1	0.61741	0.020391	0.051665	0.980541	980	2	0.61741
BORA	4	0.039879	0.11837	0.92969	2375	3	-6.3652	0.020391	0.051665	0.980541	981	1	-6.3652
RHBDL2	4	0.1259	0.27657	0.98119	5347	2	-3.2273	0.020391	0.051665	0.980541	982	1	-3.2273
RPL35A	4	0.64975	0.7839	1	14703	2	-2.8854	0.020391	0.051665	0.980541	983	1	-2.8854
CFAP221	4	0.21293	0.40317	1	7526	1	1.4917	0.02042	0.051731	0.980541	984	3	1.4917
ARPP21	4	0.80953	0.85713	1	16227	1	1.3492	0.020446	0.051791	0.980541	985	2	1.3492
COL1A1	4	0.40996	0.60354	1	11347	1	1.1367	0.02046	0.051819	0.980541	986	2	1.1367
PRICKLE2	4	0.97741	0.97761	1	18622	0	0.79062	0.020604	0.052174	0.980541	987	2	0.79062
CCDC175	4	0.72948	0.82674	1	15586	1	0.97224	0.020614	0.0522	0.980541	988	3	0.97224
MEP1B	4	0.098993	0.23478	0.975808	4542	2	-3.257	0.020657	0.052284	0.980541	989	1	-3.257
CGN	4	0.25296	0.45721	1	8511	2	-1.3557	0.020695	0.052374	0.980541	990	2	-1.3557
TMEM55A	4	0.35005	0.56037	1	10456	2	-2.6779	0.020763	0.05253	0.980541	991	1	-2.6779
ZNF681	4	0.86747	0.88578	1	16831	1	1.0681	0.020776	0.052554	0.980541	992	3	1.0681
DNMBP	4	0.19857	0.38301	1	7189	2	-1.5177	0.0208	0.052605	0.980541	993	2	-1.5177
XAB2	3	0.63559	0.71456	1	14530	1	2.3945	0.020812	0.043505	0.980541	994	2	2.3945
RACGAP1	3	0.35724	0.5119	1	10573	2	-5.1894	0.020815	0.04351	0.980541	995	1	-5.1894
MFAP1	4	0.23469	0.43279	1	8089	3	-5.0062	0.020817	0.052646	0.980541	996	1	-5.0062
NXPE2	4	0.10077	0.23753	0.977089	4601	1	0.9876	0.020844	0.052708	0.980541	997	3	0.9876
INPP5B	3	0.75613	0.78174	1	15787	1	-1.2449	0.020855	0.043581	0.980541	998	1	-1.2449
HMX3	4	0.9939	0.99394	1	18966	0	1.1984	0.020912	0.052857	0.980541	999	3	1.1984
SLC41A2	4	0.97812	0.97828	1	18636	0	-0.045015	0.020923	0.052885	0.980541	1000	1	-0.045015
PREPL	4	0.68386	0.81068	1	15239	1	0.084848	0.020958	0.052968	0.980541	1001	2	0.084848
RPF1	4	0.7694	0.84092	1	15884	1	0.96784	0.020963	0.052977	0.980541	1002	3	0.96784
POTEB3	4	0.85631	0.87954	1	16687	1	0.62823	0.020976	0.053005	0.980541	1003	2	0.62823
COPZ1	4	0.94778	0.94784	1	18012	0	-0.37087	0.020989	0.053038	0.980541	1004	2	-0.37087
ZMYND12	4	0.28954	0.50467	1	9383	1	1.0583	0.020991	0.053048	0.980541	1005	3	1.0583
RETNLB	4	0.88383	0.89555	1	17005	1	1.1845	0.021033	0.053136	0.980541	1006	3	1.1845
SYT2	4	0.9595	0.95952	1	18265	0	1.0849	0.021044	0.053161	0.980541	1007	3	1.0849
ARHGAP30	4	0.56921	0.72167	1	13593	2	-2.887	0.021082	0.053244	0.980541	1008	1	-2.887
SLC2A12	4	0.41263	0.6055	1	11406	1	1.4654	0.021134	0.053374	0.980541	1009	2	1.4654
PLEKHO2	4	0.28954	0.50467	1	9374	2	-1.2316	0.021135	0.053376	0.980541	1010	2	-1.2316
TRAF3IP2	4	0.85328	0.8779	1	16665	1	0.10916	0.021161	0.053439	0.980541	1011	2	0.10916
EVC2	4	0.40467	0.59966	1	11281	1	0.72505	0.021164	0.053443	0.980541	1012	3	0.72505
EDAR	4	0.9976	0.99759	1	19048	0	0.9367	0.021186	0.053496	0.980541	1013	3	0.9367
MST1L	4	0.26877	0.47788	1	8846	2	-2.9236	0.021189	0.053503	0.980541	1014	1	-2.9236
LILRA4	4	0.67406	0.80298	1	15073	1	0.8276	0.02119	0.053505	0.980541	1015	3	0.8276
FKTN	4	0.47181	0.64867	1	12250	1	1.0547	0.021213	0.053556	0.980541	1016	3	1.0547
FAF1	4	0.9906	0.9906	1	18895	0	1.0668	0.021226	0.05358	0.980541	1017	3	1.0668
CDIP1	4	0.086402	0.21468	0.969295	4158	1	1.0302	0.02124	0.05361	0.980541	1018	2	1.0302
SNAPIN	4	0.99645	0.99647	1	19025	0	1.0479	0.021335	0.053831	0.980541	1019	3	1.0479
NCOA4	4	0.68865	0.81393	1	15305	1	-1.0893	0.021375	0.053912	0.980541	1020	1	-1.0893
CEBPG	4	0.27656	0.48798	1	9072	3	-4.958	0.021375	0.053912	0.980541	1021	1	-4.958
ADARB1	4	0.13866	0.29599	0.992463	5657	2	-1.4488	0.021417	0.054004	0.980541	1022	2	-1.4488
BRPF3	4	0.92195	0.92338	1	17559	1	1.0241	0.021426	0.054021	0.980541	1023	3	1.0241
PHIP	4	0.23446	0.43245	1	8048	1	-2.9	0.021454	0.054092	0.980541	1024	1	-2.9
MBD3L3	4	0.35463	0.56363	1	10522	2	-0.81855	0.021462	0.054109	0.980541	1025	2	-0.81855
TGIF2LX	4	0.49849	0.66862	1	12649	2	-0.29581	0.021462	0.054109	0.980541	1026	2	-0.29581
FGF12	4	0.97576	0.97593	1	18600	0	1.2981	0.021462	0.05411	0.980541	1027	3	1.2981
2002-03-01	8	0.78611	0.92227	1	16041	2	0.5196	0.021462	0.068019	0.980541	1028	4	0.5196
HMOX1	4	0.95099	0.95103	1	18084	0	0.88706	0.021485	0.054162	0.980541	1029	3	0.88706
CCDC85B	4	0.2859	0.50003	1	9283	3	-4.6557	0.021561	0.054343	0.980541	1030	1	-4.6557
ZNF775	4	0.95502	0.95504	1	18174	0	1.3671	0.02161	0.054455	0.980541	1031	3	1.3671
CAPZA3	4	0.45135	0.63352	1	11941	2	-4.5713	0.021614	0.054463	0.980541	1032	1	-4.5713
KLHL23	4	0.69686	0.81636	1	15372	1	0.33097	0.021667	0.054594	0.980541	1033	2	0.33097
MAEA	4	0.60682	0.75062	1	14161	1	0.15795	0.02172	0.054724	0.980541	1034	2	0.15795
DTHD1	4	0.99065	0.99064	1	18897	0	0.82877	0.021736	0.054757	0.980541	1035	3	0.82877
FHL5	4	0.5785	0.7288	1	13753	1	0.94028	0.021813	0.054936	0.980541	1036	3	0.94028
CST5	4	0.014306	0.046762	0.881202	985	2	-3.6044	0.021826	0.054965	0.980541	1037	1	-3.6044
G6PD	4	0.93865	0.93871	1	17855	0	1.2299	0.021826	0.054965	0.980541	1038	3	1.2299
SRRM3	4	0.62223	0.76248	1	14341	2	-2.4567	0.021879	0.055079	0.980541	1039	1	-2.4567
CLDN25	4	0.99777	0.99778	1	19051	0	0.952	0.021924	0.055185	0.980541	1040	3	0.952
PDE6D	4	0.69382	0.81548	1	15355	1	-2.7359	0.021932	0.055204	0.980541	1041	1	-2.7359
STX11	4	0.99755	0.99754	1	19046	0	0.8724	0.021933	0.055206	0.980541	1042	3	0.8724
KRT31	4	0.4455	0.62928	1	11855	1	1.1124	0.021944	0.055231	0.980541	1043	3	1.1124
WWOX	4	0.98151	0.98153	1	18708	0	1.4104	0.021985	0.055324	0.980541	1044	2	1.4104
OR2W5	4	0.71291	0.82136	1	15477	1	1.5206	0.022062	0.055499	0.980541	1045	3	1.5206
TLE1	4	0.7262	0.8257	1	15570	1	0.72657	0.022071	0.055525	0.980541	1046	3	0.72657
ICE2	4	0.74312	0.83138	1	15693	1	-1.7546	0.022092	0.055569	0.980541	1047	1	-1.7546
DPP3	4	0.98685	0.98679	1	18819	0	0.85938	0.022126	0.055655	0.980541	1048	3	0.85938
HOPX	4	0.91963	0.92138	1	17544	1	1.5611	0.022138	0.055681	0.980541	1049	3	1.5611
GNG5	4	0.84476	0.87351	1	16561	1	-1.1913	0.022145	0.055696	0.980541	1050	2	-1.1913
TRIM58	4	0.92195	0.92338	1	17560	1	0.037744	0.02216	0.055729	0.980541	1051	2	0.037744
WDR75	3	0.41767	0.57298	1	11459	2	-4.8714	0.022172	0.045727	0.980541	1052	1	-4.8714
CT47B1	4	0.056287	0.16013	0.964638	3100	1	0.99612	0.022178	0.055777	0.980541	1053	2	0.99612
DAB2	4	0.97868	0.97883	1	18649	0	0.96349	0.022201	0.055829	0.980541	1054	3	0.96349
RNPEPL1	4	0.99251	0.99254	1	18932	0	1.0466	0.022214	0.055855	0.980541	1055	2	1.0466
EPHB4	4	0.85027	0.87633	1	16615	1	0.85501	0.022236	0.055902	0.980541	1056	3	0.85501
FAM135B	4	0.033704	0.10195	0.924302	2051	3	-5.6557	0.022251	0.055938	0.980541	1057	1	-5.6557
DEDD2	4	0.96513	0.96518	1	18357	0	0.88451	0.022288	0.056026	0.980541	1058	3	0.88451
RAB3C	4	0.83832	0.87039	1	16503	1	1.1199	0.022309	0.056075	0.980541	1059	3	1.1199
SERTAD4	4	0.3438	0.55589	1	10376	2	-1.9202	0.022404	0.056306	0.980541	1060	2	-1.9202
CCDC33	4	0.60682	0.75062	1	14136	2	-1.3103	0.022422	0.056343	0.980541	1061	2	-1.3103
ADAM30	4	0.95863	0.95865	1	18244	0	1.6564	0.022433	0.056365	0.980541	1062	3	1.6564
SLC25A27	4	0.6236	0.76358	1	14353	1	1.2366	0.0225	0.056525	0.980541	1063	3	1.2366
ODF2L	4	0.85328	0.8779	1	16659	1	0.97021	0.022516	0.056558	0.980541	1064	3	0.97021
ITPRIPL2	4	0.74986	0.83376	1	15751	1	-1.3154	0.022517	0.056559	0.980541	1065	1	-1.3154
RAPGEFL1	4	0.079597	0.20363	0.969295	3935	3	-5.9181	0.022517	0.056559	0.980541	1066	1	-5.9181
SLCO1B3	4	0.87873	0.89242	1	16952	1	0.83929	0.02252	0.056571	0.980541	1067	3	0.83929
RGS9BP	4	0.92664	0.92744	1	17640	1	1.0316	0.022539	0.056614	0.980541	1068	3	1.0316
GFPT1	4	0.67406	0.80298	1	15066	2	-1.0609	0.022558	0.056659	0.980541	1069	2	-1.0609
SKI	4	0.82944	0.86613	1	16407	1	-0.94751	0.022567	0.056677	0.980541	1070	2	-0.94751
ABCC2	4	0.27362	0.48422	1	8964	1	-0.73111	0.022586	0.056719	0.980541	1071	2	-0.73111
C3orf79	4	0.92539	0.92632	1	17623	1	1.1372	0.022606	0.056763	0.980541	1072	3	1.1372
ACOT2	4	0.96031	0.96034	1	18279	0	0.66245	0.022613	0.056774	0.980541	1073	2	0.66245
ALS2	4	0.10034	0.23682	0.975869	4584	2	-4.6153	0.022676	0.056919	0.980541	1074	1	-4.6153
AGTPBP1	4	0.99787	0.99787	1	19052	0	1.1551	0.02268	0.056925	0.980541	1075	3	1.1551
CSDE1	4	0.69382	0.81548	1	15353	1	1.1924	0.022717	0.057015	0.980541	1076	3	1.1924
CCDC152	4	0.65167	0.78538	1	14755	1	1.3407	0.022717	0.057015	0.980541	1077	3	1.3407
TSPAN11	4	0.88636	0.89717	1	17048	1	-3.5445	0.022755	0.057112	0.980541	1078	1	-3.5445
PLK1	4	0.55801	0.7132	1	13462	2	-3.8732	0.022755	0.057112	0.980541	1079	1	-3.8732
CCDC94	4	0.99379	0.99382	1	18964	0	0.82177	0.022798	0.057204	0.980541	1080	3	0.82177
MAS1	4	0.44834	0.63131	1	11895	1	1.109	0.022803	0.057215	0.980541	1081	3	1.109
SLCO6A1	4	0.031326	0.095441	0.917463	1933	2	-3.2858	0.022862	0.057339	0.980541	1082	1	-3.2858
NECAB2	4	0.31555	0.53574	1	9962	2	-2.5147	0.022862	0.057339	0.980541	1083	1	-2.5147
WFDC2	4	0.58803	0.73612	1	13871	2	-4.2825	0.022941	0.057506	0.980541	1084	1	-4.2825
FCGR3A	4	0.62712	0.76632	1	14421	1	1.0968	0.022966	0.057567	0.980541	1085	3	1.0968
ABCB8	4	0.98508	0.98506	1	18783	0	0.078315	0.022994	0.057643	0.980541	1086	2	0.078315
GUK1	3	0.91931	0.91939	1	17513	0	1.9546	0.022998	0.047058	0.980541	1087	2	1.9546
OR5L2	4	0.40838	0.60236	1	11335	2	-0.22537	0.023033	0.057732	0.980541	1088	2	-0.22537
SATB1	4	0.99654	0.99657	1	19028	0	1.4937	0.023042	0.057749	0.980541	1089	3	1.4937
IFT122	4	0.44513	0.62898	1	11840	2	-3.3333	0.023047	0.057758	0.980541	1090	1	-3.3333
SMIM1	3	0.79767	0.80985	1	16138	1	0.16932	0.023089	0.047196	0.980541	1091	1	0.16932
ARPC5L	4	0.55324	0.70954	1	13408	1	-1.4562	0.0231	0.057873	0.980541	1092	2	-1.4562
PTX4	4	0.93522	0.93535	1	17785	1	0.72614	0.023125	0.057938	0.980541	1093	3	0.72614
SEC11A	4	0.54072	0.70009	1	13215	1	0.57204	0.023153	0.058006	0.980541	1094	2	0.57204
MSX1	4	0.70659	0.81935	1	15427	1	0.61453	0.023162	0.058024	0.980541	1095	2	0.61453
KLF15	4	0.89565	0.90331	1	17168	1	0.79779	0.023165	0.058029	0.980541	1096	3	0.79779
EIF1AX	3	0.8324	0.83653	1	16447	1	-3.9482	0.023169	0.047325	0.980541	1097	1	-3.9482
POLE3	4	0.2198	0.41253	1	7685	3	-5.627	0.023207	0.058129	0.980541	1098	1	-5.627
ALPP	4	0.10391	0.24242	0.977779	4681	1	0.82219	0.023242	0.058211	0.980541	1099	3	0.82219
DMRTC2	4	0.17667	0.35196	1	6632	1	-0.44631	0.02326	0.058245	0.980541	1100	1	-0.44631
AKNA	4	0.39146	0.59006	1	11094	1	-0.58902	0.023328	0.058406	0.980541	1101	2	-0.58902
PRSS8	4	0.97152	0.97165	1	18492	0	-0.70511	0.023366	0.058502	0.980541	1102	1	-0.70511
STK40	4	0.98977	0.98973	1	18880	0	0.74744	0.023391	0.058552	0.980541	1103	3	0.74744
KRTAP11-1	3	0.97282	0.97297	1	18531	0	1.9979	0.023392	0.047669	0.980541	1104	2	1.9979
AMOTL2	4	0.98455	0.98454	1	18776	0	1.1323	0.023398	0.058569	0.980541	1105	3	1.1323
EFCAB6	4	0.6236	0.76358	1	14364	1	1.3472	0.02342	0.058612	0.980541	1106	2	1.3472
ANXA4	4	0.99759	0.99758	1	19047	0	0.86918	0.023421	0.058615	0.980541	1107	3	0.86918
GNE	4	0.58732	0.73561	1	13857	1	1.4413	0.02345	0.058683	0.980541	1108	3	1.4413
BOLA3	3	0.76661	0.78853	1	15876	1	1.9317	0.023513	0.047871	0.980541	1109	2	1.9317
GLTSCR1L	4	0.91491	0.9175	1	17455	1	1.48	0.023522	0.058848	0.980541	1110	2	1.48
PRAMEF2	4	0.049755	0.14371	0.94944	2842	2	-2.0359	0.023525	0.058858	0.980541	1111	1	-2.0359
C1orf195	4	0.2791	0.49131	1	9117	1	0.76325	0.023539	0.058898	0.980541	1112	3	0.76325
GDPGP1	4	0.33763	0.55148	1	10272	2	-0.70077	0.023554	0.058926	0.980541	1113	2	-0.70077
TMEM106C	4	0.50751	0.67532	1	12773	1	0.83423	0.023554	0.058926	0.980541	1114	2	0.83423
C1QL4	4	0.81112	0.85782	1	16236	1	0.39827	0.023577	0.058979	0.980541	1115	2	0.39827
GDF5	4	0.6341	0.7717	1	14513	2	-4.0325	0.023578	0.05898	0.980541	1116	1	-4.0325
MN1	4	0.65336	0.78667	1	14783	1	1.1958	0.023615	0.05907	0.980541	1117	3	1.1958
SUGP2	4	0.96703	0.96707	1	18406	0	1.6159	0.023631	0.059104	0.980541	1118	2	1.6159
SLC6A5	4	0.83832	0.87039	1	16497	1	1.0676	0.023642	0.059127	0.980541	1119	2	1.0676
SHCBP1	4	0.64054	0.77667	1	14599	1	-0.29689	0.02368	0.059226	0.980541	1120	2	-0.29689
KCTD5	4	0.93099	0.93137	1	17735	1	0.86622	0.023696	0.059264	0.980541	1121	3	0.86622
NME2	4	0.5471	0.70493	1	13330	1	-0.83363	0.023717	0.059306	0.980541	1122	2	-0.83363
COQ9	4	0.16068	0.32876	1	6210	2	-3.8629	0.023737	0.059352	0.980541	1123	1	-3.8629
PHLDB3	4	0.52845	0.69098	1	13062	1	1.3337	0.023745	0.059371	0.980541	1124	2	1.3337
GLRA4	4	0.81717	0.86047	1	16281	1	1.4336	0.023745	0.059371	0.980541	1125	2	1.4336
MAPK4	4	0.56594	0.7192	1	13573	1	1.0188	0.023756	0.059396	0.980541	1126	3	1.0188
FAM101A	3	0.31845	0.47206	1	9990	2	-3.3425	0.023807	0.048364	0.980541	1127	1	-3.3425
LTA4H	4	0.98686	0.9868	1	18820	0	1.3739	0.023815	0.059533	0.980541	1128	3	1.3739
CCDC68	4	0.98202	0.98205	1	18719	0	1.0846	0.023843	0.059594	0.980541	1129	2	1.0846
DNAJB6	4	0.60996	0.75303	1	14177	1	1.4574	0.023882	0.059691	0.980541	1130	3	1.4574
PROP1	4	0.070715	0.18886	0.965596	3673	2	-3.6953	0.023896	0.059715	0.980541	1131	1	-3.6953
OR5AP2	4	0.61313	0.75549	1	14213	1	1.2262	0.023922	0.059769	0.980541	1132	2	1.2262
FAM26E	4	0.99772	0.99772	1	19050	0	1.1249	0.02394	0.059815	0.980541	1133	3	1.1249
LSR	4	0.99725	0.99725	1	19044	0	1.206	0.023944	0.059825	0.980541	1134	3	1.206
KCTD1	4	0.68868	0.81394	1	15306	1	-0.24529	0.023949	0.059836	0.980541	1135	1	-0.24529
STX19	4	0.99097	0.99097	1	18906	0	0.99857	0.023973	0.059894	0.980541	1136	3	0.99857
CDC23	4	0.82016	0.8618	1	16311	1	-3.0032	0.024002	0.059956	0.980541	1137	1	-3.0032
LRFN4	4	0.59072	0.73822	1	13913	1	1.011	0.024006	0.059966	0.980541	1138	2	1.011
ADD2	4	0.12183	0.27034	0.981099	5215	1	0.22032	0.024024	0.060011	0.980541	1139	2	0.22032
CCR9	4	0.1785	0.3546	1	6662	2	-2.083	0.024062	0.06011	0.980541	1140	2	-2.083
LOC403312	4	0.99556	0.99554	1	19007	0	1.0817	0.024103	0.060202	0.980541	1141	3	1.0817
C3orf36	4	0.39735	0.59437	1	11178	2	-2.1305	0.024188	0.060389	0.980541	1142	1	-2.1305
CYSLTR1	4	0.16295	0.3321	1	6261	1	0.25198	0.024188	0.060389	0.980541	1143	2	0.25198
CCRL2	3	0.96704	0.96725	1	18408	0	-0.37598	0.024245	0.049088	0.980541	1144	1	-0.37598
FAM217A	3	0.56863	0.68346	1	13590	1	1.3092	0.024365	0.04928	0.980541	1145	2	1.3092
IGFL4	4	0.62508	0.76476	1	14388	2	-1.385	0.0244	0.060864	0.980541	1146	2	-1.385
CYS1	4	0.97631	0.97651	1	18608	0	0.94418	0.024409	0.060885	0.980541	1147	2	0.94418
LRRN4CL	4	0.90236	0.908	1	17262	1	0.55433	0.024447	0.060961	0.980541	1148	2	0.55433
ZNF497	3	0.029476	0.074134	0.910875	1826	1	1.564	0.02447	0.049476	0.980541	1149	2	1.564
OR51G2	4	0.4544	0.6358	1	11973	1	-2.6317	0.024479	0.06102	0.980541	1150	1	-2.6317
SLC25A42	4	0.99049	0.99049	1	18889	0	1.1684	0.024532	0.061136	0.980541	1151	2	1.1684
GMNN	4	0.57526	0.72628	1	13714	2	-2.2577	0.024585	0.061259	0.980541	1152	1	-2.2577
SLC13A1	4	0.15317	0.31763	1	6025	2	-1.8185	0.024588	0.061268	0.980541	1153	2	-1.8185
DNPEP	3	0.13778	0.28094	0.985362	5632	1	1.7218	0.024614	0.049711	0.980541	1154	2	1.7218
ANKRD20A1	3	0.64979	0.72155	1	14737	1	1.852	0.024635	0.049748	0.980541	1155	2	1.852
SIRT6	4	0.96615	0.96621	1	18383	0	-1.3247	0.024691	0.061491	0.980541	1156	1	-1.3247
SRF	4	0.63127	0.76954	1	14481	2	-1.1876	0.024707	0.061532	0.980541	1157	2	-1.1876
RBX1	3	0.49165	0.64659	1	12529	1	2.2266	0.024707	0.049855	0.980541	1158	2	2.2266
ABCC11	4	0.31115	0.53184	1	9841	2	-2.8913	0.024744	0.061608	0.980541	1159	1	-2.8913
SUV39H1	4	0.94988	0.94993	1	18063	0	0.28462	0.024745	0.06161	0.980541	1160	3	0.28462
FOXL1	4	0.94988	0.94993	1	18067	0	0.20429	0.024745	0.06161	0.980541	1161	3	0.20429
GDPD2	4	0.49587	0.66663	1	12613	1	0.66719	0.024745	0.06161	0.980541	1162	3	0.66719
VGLL4	4	0.65336	0.78667	1	14784	1	0.63363	0.024745	0.06161	0.980541	1163	3	0.63363
ACMSD	4	0.97576	0.97593	1	18596	0	0.34797	0.024745	0.06161	0.980541	1164	3	0.34797
OIP5	4	0.92195	0.92338	1	17557	1	0.44115	0.024745	0.06161	0.980541	1165	3	0.44115
FAM47C	4	0.85895	0.88094	1	16722	1	0.24397	0.024745	0.06161	0.980541	1166	3	0.24397
ACADL	4	0.9417	0.94178	1	17901	0	0.20055	0.024745	0.06161	0.980541	1167	3	0.20055
EIF4EBP2	4	0.99489	0.9949	1	18989	0	0.8104	0.024745	0.06161	0.980541	1168	3	0.8104
FIGNL2	4	0.63898	0.77545	1	14588	1	0.50374	0.024745	0.06161	0.980541	1169	3	0.50374
CIB2	4	0.85163	0.87699	1	16644	1	0.10586	0.024745	0.06161	0.980541	1170	3	0.10586
PYDC2	4	0.58138	0.73101	1	13778	1	0.42785	0.024745	0.06161	0.980541	1171	3	0.42785
PRDM6	4	0.24972	0.45288	1	8428	1	0.17047	0.024745	0.06161	0.980541	1172	3	0.17047
ADAM20	4	0.00062091	0.0022719	0.620596	68	2	-2.7292	0.024797	0.061737	0.980541	1173	1	-2.7292
ABCG5	3	0.98352	0.98367	1	18745	0	1.8357	0.024807	0.050018	0.980541	1174	2	1.8357
RAB7B	4	0.56241	0.71654	1	13511	1	0.7169	0.024835	0.061818	0.980541	1175	2	0.7169
EIF4EBP1	4	0.14217	0.30123	0.993682	5735	3	-4.6319	0.02485	0.061854	0.980541	1176	1	-4.6319
PDE4D	4	0.96216	0.96218	1	18312	0	-1.4967	0.024903	0.061988	0.980541	1177	1	-1.4967
GLT8D1	4	0.44255	0.62717	1	11799	1	1.846	0.025001	0.062216	0.980541	1178	2	1.846
LRRC66	4	0.42619	0.61535	1	11587	1	-0.029756	0.025009	0.062238	0.980541	1179	1	-0.029756
MAZ	4	0.27876	0.49085	1	9099	2	-2.0989	0.025062	0.062344	0.980541	1180	2	-2.0989
HIST1H3F	4	0.7466	0.83262	1	15712	1	-0.58544	0.025139	0.062523	0.980541	1181	2	-0.58544
METRN	4	0.61669	0.75826	1	14272	1	-4.0024	0.025168	0.062589	0.980541	1182	1	-4.0024
GAGE12H	4	0.8798	0.8931	1	16956	1	-0.63426	0.025216	0.062699	0.980541	1183	2	-0.63426
C6	3	0.97266	0.97283	1	18530	0	1.5923	0.025264	0.050788	0.980541	1184	2	1.5923
PRRC2A	4	0.94909	0.94912	1	18048	0	0.65372	0.025273	0.062831	0.980541	1185	2	0.65372
WNT2B	4	0.7595	0.83723	1	15805	1	-1.9974	0.025274	0.062834	0.980541	1186	1	-1.9974
TOP3A	4	0.25463	0.45938	1	8522	3	-2.8309	0.025327	0.062965	0.980541	1187	1	-2.8309
CCL18	4	0.67426	0.80313	1	15101	2	-2.6282	0.02538	0.063079	0.980541	1188	1	-2.6282
RRP15	4	0.98984	0.9898	1	18883	0	1.4704	0.025386	0.063093	0.980541	1189	3	1.4704
DEGS1	4	0.87624	0.89094	1	16918	1	0.84053	0.025398	0.063121	0.980541	1190	3	0.84053
ZNF326	4	0.2961	0.51294	1	9517	2	-1.7793	0.025479	0.0633	0.980541	1191	2	-1.7793
CDON	4	0.18871	0.36914	1	6921	2	-3.188	0.025486	0.063317	0.980541	1192	1	-3.188
GAR1	4	0.91731	0.91944	1	17480	1	1.1144	0.025533	0.063425	0.980541	1193	3	1.1144
ZMYM4	4	0.98324	0.98325	1	18739	0	1.0696	0.025539	0.063437	0.980541	1194	2	1.0696
ARTN	3	0.92741	0.92753	1	17655	0	1.8195	0.025564	0.051262	0.980541	1195	2	1.8195
SYT10	4	0.13362	0.28828	0.989499	5540	3	-5.5977	0.025592	0.063544	0.980541	1196	1	-5.5977
GAB4	4	0.25296	0.45721	1	8518	1	1.2285	0.025613	0.063583	0.980541	1197	3	1.2285
BCL2L14	4	0.25638	0.46171	1	8599	1	0.53318	0.025633	0.063628	0.980541	1198	2	0.53318
ICAM4	4	0.08647	0.21479	0.969295	4167	2	-2.4393	0.025676	0.06373	0.980541	1199	2	-2.4393
GPD2	4	0.18998	0.37096	1	6947	1	-0.16574	0.025698	0.063773	0.980541	1200	1	-0.16574
OR2M7	4	0.83832	0.87039	1	16516	1	0.72557	0.025703	0.063782	0.980541	1201	3	0.72557
ZNF544	4	0.97361	0.97376	1	18547	0	0.69641	0.025708	0.063796	0.980541	1202	3	0.69641
SSC4D	4	0.13246	0.28651	0.989499	5489	2	-4.4654	0.025751	0.063892	0.980541	1203	1	-4.4654
TEX14	4	0.66708	0.79744	1	14966	1	0.66004	0.025753	0.063898	0.980541	1204	3	0.66004
CLN5	4	0.80809	0.8565	1	16221	1	1.4603	0.025788	0.063968	0.980541	1205	3	1.4603
CCDC177	4	0.31321	0.53407	1	9928	1	0.93244	0.025798	0.063997	0.980541	1206	3	0.93244
TCIRG1	4	0.53442	0.69533	1	13131	2	-1.8078	0.025804	0.064013	0.980541	1207	2	-1.8078
LDLRAD4	4	0.66349	0.79458	1	14925	1	-0.084876	0.025857	0.064129	0.980541	1208	2	-0.084876
SLC16A1	4	0.76597	0.83959	1	15875	1	1.5024	0.025863	0.064141	0.980541	1209	3	1.5024
PMAIP1	4	0.91394	0.9167	1	17428	1	-1.0011	0.02591	0.064252	0.980541	1210	2	-1.0011
CD101	4	0.55324	0.70954	1	13415	1	1.5327	0.025918	0.064267	0.980541	1211	2	1.5327
DQX1	4	0.0057803	0.019883	0.823094	453	2	-2.8551	0.025927	0.064285	0.980541	1212	2	-2.8551
APBA2	4	0.29949	0.51726	1	9585	3	-4.6212	0.025963	0.064356	0.980541	1213	1	-4.6212
CRHR2	4	0.63717	0.77403	1	14541	1	1.3387	0.025966	0.064367	0.980541	1214	3	1.3387
SLC39A8	4	0.62508	0.76476	1	14377	2	-4.1182	0.026016	0.064481	0.980541	1215	1	-4.1182
TAS2R1	4	0.36786	0.57309	1	10724	2	-0.34932	0.026063	0.064584	0.980541	1216	2	-0.34932
GATAD2B	4	0.64628	0.78119	1	14667	2	-3.3095	0.026069	0.064596	0.980541	1217	1	-3.3095
CNDP2	4	0.18871	0.36914	1	6929	2	-3.7963	0.026122	0.064718	0.980541	1218	1	-3.7963
GIN1	4	0.020079	0.063924	0.900651	1336	2	-2.6574	0.026175	0.064857	0.980541	1219	2	-2.6574
NEDD8-MDP1	4	0.088721	0.21846	0.969592	4225	2	-1.3279	0.026175	0.064857	0.980541	1220	2	-1.3279
UTP14A	3	0.96882	0.96903	1	18429	0	1.6914	0.026197	0.052248	0.980541	1221	2	1.6914
FAM133A	4	0.9102	0.91381	1	17350	1	0.71602	0.026238	0.065008	0.980541	1222	2	0.71602
CFHR5	4	0.14691	0.30828	1	5856	1	-1.8531	0.02628	0.065097	0.980541	1223	1	-1.8531
CXXC5	4	0.79235	0.84993	1	16083	1	1.076	0.026308	0.065168	0.980541	1224	3	1.076
KAZN	4	0.9586	0.95861	1	18242	0	0.91797	0.026313	0.065181	0.980541	1225	3	0.91797
SSTR1	4	0.83832	0.87039	1	16498	1	-0.82684	0.026333	0.065227	0.980541	1226	1	-0.82684
DDX1	4	0.87492	0.89017	1	16912	1	0.10174	0.026335	0.065229	0.980541	1227	2	0.10174
NPIPB5	4	0.9537	0.95373	1	18137	0	-0.52468	0.026345	0.065248	0.980541	1228	2	-0.52468
FIGLA	4	0.99595	0.99594	1	19016	0	0.91067	0.026356	0.065271	0.980541	1229	3	0.91067
SIMC1	4	0.78903	0.84859	1	16068	1	1.0015	0.026384	0.065335	0.980541	1230	3	1.0015
RNF13	4	0.85027	0.87633	1	16641	1	-3.2805	0.026413	0.065404	0.980541	1231	1	-3.2805
LRRC4B	4	0.94988	0.94993	1	18052	0	1.3402	0.02644	0.065453	0.980541	1232	3	1.3402
RAX	4	0.81281	0.85854	1	16260	1	0.65019	0.026491	0.065572	0.980541	1233	2	0.65019
OR52J3	4	0.6236	0.76358	1	14362	1	0.37086	0.026492	0.065572	0.980541	1234	2	0.37086
GK	4	0.63969	0.77597	1	14593	2	-0.43463	0.026545	0.065683	0.980541	1235	2	-0.43463
FAM76A	4	0.86174	0.88252	1	16762	1	1.0443	0.026562	0.065731	0.980541	1236	3	1.0443
GPER1	4	0.47763	0.65301	1	12351	1	-2.1451	0.026598	0.06581	0.980541	1237	1	-2.1451
ZNF562	4	0.78601	0.84739	1	16025	1	0.27146	0.026599	0.065813	0.980541	1238	2	0.27146
TOM1L2	4	0.96766	0.96772	1	18412	0	1.285	0.026638	0.065917	0.980541	1239	2	1.285
AARSD1	4	0.40597	0.60059	1	11285	2	-1.774	0.026648	0.065943	0.980541	1240	2	-1.774
PRLHR	4	0.030535	0.093288	0.917463	1886	2	-3.1098	0.026677	0.066013	0.980541	1241	1	-3.1098
H2AFB1	4	0.93301	0.93322	1	17755	1	-2.8858	0.026677	0.066013	0.980541	1242	1	-2.8858
UGT1A4	4	0.048949	0.14166	0.94944	2803	1	-0.98134	0.026757	0.066203	0.980541	1243	1	-0.98134
TNFRSF17	4	0.0025628	0.0091136	0.740182	231	1	0.93707	0.026772	0.066239	0.980541	1244	3	0.93707
TNXB	4	0.91269	0.91571	1	17401	1	-3.5184	0.02681	0.066319	0.980541	1245	1	-3.5184
NHEJ1	4	0.91963	0.92138	1	17529	1	1.4619	0.026855	0.066411	0.980541	1246	3	1.4619
WIPI2	4	0.47763	0.65301	1	12354	1	-0.6091	0.026863	0.066431	0.980541	1247	1	-0.6091
CIRBP	4	0.9883	0.9883	1	18850	0	0.87586	0.026916	0.06657	0.980541	1248	2	0.87586
HOXC4	4	0.35214	0.56185	1	10490	1	1.2611	0.026918	0.066572	0.980541	1249	2	1.2611
MRFAP1L1	4	0.98226	0.98228	1	18723	0	0.040922	0.026958	0.066665	0.980541	1250	3	0.040922
PEX19	4	0.83232	0.86752	1	16445	1	-0.87367	0.026968	0.066685	0.980541	1251	2	-0.87367
FCRL4	4	0.97504	0.97522	1	18585	0	0.99995	0.027035	0.066821	0.980541	1252	3	0.99995
MISP	4	0.84154	0.8719	1	16542	1	-2.0905	0.027127	0.067024	0.980541	1253	1	-2.0905
DMC1	4	0.12389	0.27348	0.98119	5281	1	0.97413	0.027128	0.067027	0.980541	1254	3	0.97413
CDK11A	4	0.59072	0.73822	1	13926	1	0.12159	0.02718	0.067155	0.980541	1255	1	0.12159
HTR2B	4	0.92781	0.92849	1	17663	1	1.0467	0.027182	0.067161	0.980541	1256	3	1.0467
CTDNEP1	4	0.93301	0.93322	1	17768	1	1.0495	0.027224	0.06726	0.980541	1257	3	1.0495
TMEM154	4	0.55919	0.7141	1	13489	1	-0.34647	0.027233	0.067277	0.980541	1258	2	-0.34647
NR1I2	4	0.9857	0.98568	1	18796	0	0.99557	0.027248	0.06731	0.980541	1259	2	0.99557
PRICKLE3	4	0.19624	0.3797	1	7117	1	0.80471	0.027252	0.067318	0.980541	1260	3	0.80471
SRPK3	4	0.034828	0.10496	0.929217	2105	2	-1.6486	0.027258	0.067335	0.980541	1261	2	-1.6486
KRTAP1-5	4	0.12657	0.27757	0.98311	5359	2	-1.2231	0.027278	0.067377	0.980541	1262	2	-1.2231
PTPRO	4	0.1729	0.34657	1	6523	2	-1.7476	0.027286	0.067393	0.980541	1263	2	-1.7476
ZNF24	4	0.37562	0.57868	1	10862	1	0.75429	0.027315	0.067458	0.980541	1264	3	0.75429
WDR31	4	0.94572	0.94575	1	17990	0	0.095273	0.027332	0.067501	0.980541	1265	2	0.095273
IL1RAPL2	4	0.0045287	0.015761	0.801523	368	1	-2.0568	0.027339	0.06752	0.980541	1266	1	-2.0568
PRKG1	4	0.90236	0.908	1	17257	1	1.5669	0.027352	0.06754	0.980541	1267	3	1.5669
CEP126	4	0.94988	0.94993	1	18071	0	0.97288	0.027367	0.067566	0.980541	1268	3	0.97288
PCP2	4	0.30737	0.52711	1	9782	2	-3.0697	0.027392	0.067625	0.980541	1269	1	-3.0697
RHBDL3	4	0.68718	0.81331	1	15297	2	-4.2696	0.027445	0.067734	0.980541	1270	1	-4.2696
LRRC8D	4	0.99788	0.99788	1	19053	0	1.4289	0.027466	0.067788	0.980541	1271	3	1.4289
FUOM	4	0.1862	0.36558	1	6858	2	-1.9353	0.027497	0.067859	0.980541	1272	2	-1.9353
EIF4ENIF1	3	0.85904	0.8597	1	16746	1	-1.7681	0.027509	0.054346	0.980541	1273	1	-1.7681
DOK5	4	0.93099	0.93137	1	17730	1	0.50758	0.027516	0.067895	0.980541	1274	2	0.50758
RAB33B	4	0.89146	0.9005	1	17118	1	0.74728	0.027546	0.067964	0.980541	1275	2	0.74728
FOXA3	4	0.96134	0.96132	1	18296	0	0.9405	0.027566	0.068004	0.980541	1276	2	0.9405
HAO2	4	0.77938	0.84471	1	15952	1	0.86167	0.027586	0.06805	0.980541	1277	3	0.86167
MCL1	4	0.40597	0.60059	1	11287	2	-2.1229	0.027603	0.068094	0.980541	1278	2	-2.1229
TFAP2C	4	0.75638	0.83612	1	15794	1	0.94897	0.027643	0.068187	0.980541	1279	3	0.94897
ZBED9	4	0.22323	0.41724	1	7780	1	0.75947	0.027672	0.068255	0.980541	1280	3	0.75947
TRAM1	4	0.34598	0.55744	1	10394	1	0.6536	0.027672	0.068255	0.980541	1281	3	0.6536
ZNF653	4	0.99053	0.99053	1	18891	0	0.95199	0.02768	0.068275	0.980541	1282	3	0.95199
TSNAX	4	0.93961	0.93973	1	17875	0	-0.81343	0.027725	0.068378	0.980541	1283	2	-0.81343
C6orf163	4	0.92567	0.92657	1	17628	1	1.0319	0.027748	0.068436	0.980541	1284	3	1.0319
SLC25A24	4	0.97493	0.97509	1	18580	0	1.1248	0.027803	0.068576	0.980541	1285	3	1.1248
SOCS1	4	0.50399	0.6727	1	12748	1	0.80387	0.027838	0.068646	0.980541	1286	3	0.80387
TSG101	4	0.1259	0.27657	0.98119	5350	2	-3.1179	0.027894	0.068768	0.980541	1287	1	-3.1179
USP19	4	0.026594	0.082287	0.914651	1685	3	-6.1602	0.027894	0.068768	0.980541	1288	1	-6.1602
INPP4B	4	0.99279	0.99282	1	18939	0	1.166	0.027924	0.068828	0.980541	1289	3	1.166
COL4A3BP	4	0.21689	0.40867	1	7636	1	0.9083	0.027943	0.068868	0.980541	1290	3	0.9083
RAB3A	4	0.84476	0.87351	1	16562	1	0.99216	0.027948	0.068883	0.980541	1291	3	0.99216
NXN	4	0.72948	0.82674	1	15580	1	1.3321	0.028011	0.069036	0.980541	1292	3	1.3321
FAM81B	4	0.21045	0.39975	1	7480	3	-5.508	0.028026	0.069068	0.980541	1293	1	-5.508
NOL4	3	0.97562	0.97581	1	18593	0	1.5945	0.028035	0.055186	0.980541	1294	2	1.5945
THAP2	4	0.72299	0.82465	1	15542	1	0.65077	0.028064	0.069137	0.980541	1295	3	0.65077
FGF7	4	0.015223	0.049583	0.885816	1055	1	0.68583	0.028079	0.069174	0.980541	1296	2	0.68583
TARP	4	0.95494	0.95496	1	18172	0	1.0115	0.028085	0.069192	0.980541	1297	3	1.0115
RHCG	4	0.12943	0.28195	0.986075	5424	1	0.57439	0.028091	0.069203	0.980541	1298	3	0.57439
FAM120C	4	0.96634	0.96639	1	18387	0	1.5204	0.028107	0.069238	0.980541	1299	3	1.5204
POPDC3	4	0.5441	0.70266	1	13268	1	-2.5038	0.028185	0.069405	0.980541	1300	1	-2.5038
LENG1	4	0.96703	0.96707	1	18401	0	0.068565	0.028213	0.069462	0.980541	1301	3	0.068565
RPL17	2	0.5654	0.59089	1	13569	1	-0.76226	0.028218	0.051727	0.980541	1302	1	-0.76226
C2orf61	3	0.55817	0.67893	1	13480	1	1.7051	0.028225	0.055471	0.980541	1303	2	1.7051
HSPB6	4	0.84154	0.8719	1	16538	1	-0.10399	0.028238	0.069512	0.980541	1304	2	-0.10399
INIP	4	0.96883	0.9689	1	18441	0	1.1629	0.028244	0.069529	0.980541	1305	3	1.1629
POLR1D	3	0.85904	0.8597	1	16744	1	1.6907	0.028247	0.055509	0.980541	1306	2	1.6907
GRIN2C	4	0.83534	0.86897	1	16476	1	0.36624	0.028256	0.069559	0.980541	1307	2	0.36624
BRINP3	4	0.11906	0.26605	0.979598	5145	2	-2.1476	0.028291	0.069626	0.980541	1308	2	-2.1476
LDB3	4	0.9854	0.98538	1	18791	0	0.80747	0.028298	0.069641	0.980541	1309	3	0.80747
RAB28	4	0.26332	0.47096	1	8722	1	0.80682	0.028327	0.069713	0.980541	1310	3	0.80682
KCNJ11	4	0.00016816	0.00065055	0.549208	21	2	-2.4375	0.028343	0.069748	0.980541	1311	2	-2.4375
TESK1	4	0.99278	0.99281	1	18937	0	0.77857	0.028383	0.069837	0.980541	1312	3	0.77857
CD200R1	4	0.26332	0.47096	1	8720	1	0.10636	0.028387	0.06985	0.980541	1313	2	0.10636
SNX22	4	0.43486	0.62158	1	11691	2	-0.57276	0.028396	0.069873	0.980541	1314	2	-0.57276
FAXC	4	0.99362	0.99365	1	18958	0	1.4982	0.028407	0.069896	0.980541	1315	3	1.4982
CCDC108	4	0.70659	0.81935	1	15419	1	0.44437	0.028407	0.069896	0.980541	1316	2	0.44437
LHCGR	4	0.92764	0.92834	1	17659	1	0.92821	0.028471	0.07002	0.980541	1317	3	0.92821
PRRG4	4	0.0033999	0.011986	0.767282	291	3	-6.5669	0.028502	0.070086	0.980541	1318	1	-6.5669
ZNF774	4	0.090257	0.22091	0.970851	4277	1	0.71418	0.028527	0.070145	0.980541	1319	3	0.71418
SLX4IP	4	0.3306	0.54645	1	10155	1	-1.2253	0.028555	0.070213	0.980541	1320	1	-1.2253
SNX27	4	0.37879	0.5809	1	10895	2	-1.8484	0.028558	0.070221	0.980541	1321	2	-1.8484
MMP16	4	0.86174	0.88252	1	16769	1	0.35036	0.028654	0.070438	0.980541	1322	2	0.35036
NKX3-1	4	0.85027	0.87633	1	16619	1	1.2637	0.028654	0.070438	0.980541	1323	2	1.2637
LIMS2	4	0.42061	0.61122	1	11483	2	-4.6269	0.02866	0.070455	0.980541	1324	1	-4.6269
MYL3	3	0.74151	0.77253	1	15669	1	1.3784	0.028673	0.056214	0.980541	1325	2	1.3784
GTF2A1L	4	0.94778	0.94784	1	18017	0	-0.78991	0.028713	0.07058	0.980541	1326	1	-0.78991
TCEA1	4	0.6236	0.76358	1	14355	1	0.068778	0.02873	0.070611	0.980541	1327	2	0.068778
OR10G7	4	0.2717	0.48175	1	8928	1	-3.9173	0.028766	0.070709	0.980541	1328	1	-3.9173
N4BP3	4	0.68712	0.81327	1	15251	1	1.0144	0.0288	0.070795	0.980541	1329	3	1.0144
TLR8	4	0.56594	0.7192	1	13581	1	0.52548	0.028801	0.070797	0.980541	1330	2	0.52548
RGPD4	4	0.99544	0.99544	1	19003	0	0.88632	0.028805	0.070808	0.980541	1331	3	0.88632
MYD88	4	0.91963	0.92138	1	17533	1	0.99809	0.028811	0.070823	0.980541	1332	2	0.99809
TMED10	4	0.10739	0.24789	0.977779	4771	2	-4.5609	0.028819	0.070847	0.980541	1333	1	-4.5609
FAM132B	4	0.95291	0.95297	1	18127	0	-0.020776	0.028837	0.070889	0.980541	1334	3	-0.020776
SCN8A	4	0.96033	0.96036	1	18280	0	0.99486	0.028852	0.070916	0.980541	1335	2	0.99486
SLC39A3	4	0.50399	0.6727	1	12749	1	-0.065975	0.028862	0.070936	0.980541	1336	2	-0.065975
MPP4	4	0.9076	0.91184	1	17331	1	0.66173	0.02887	0.070952	0.980541	1337	3	0.66173
TAS2R60	4	0.63127	0.76954	1	14469	2	-4.3857	0.028872	0.070956	0.980541	1338	1	-4.3857
ST8SIA4	4	0.98726	0.98721	1	18829	0	1.0962	0.028896	0.071012	0.980541	1339	3	1.0962
CDK10	4	0.51344	0.67968	1	12859	2	-1.3429	0.028923	0.07107	0.980541	1340	2	-1.3429
GABRQ	4	0.060262	0.1697	0.96493	3272	1	0.85773	0.028923	0.071071	0.980541	1341	3	0.85773
CLASP2	3	0.35989	0.51458	1	10591	1	-2.3814	0.02894	0.056633	0.980541	1342	1	-2.3814
BTBD18	4	0.040207	0.11923	0.930368	2387	1	0.39774	0.028943	0.071117	0.980541	1343	2	0.39774
CRYBG3	4	0.86174	0.88252	1	16766	1	0.85284	0.028961	0.071166	0.980541	1344	3	0.85284
TAF7	4	0.81412	0.85911	1	16272	1	0.91519	0.028983	0.071217	0.980541	1345	3	0.91519
STRA13	4	0.35619	0.56471	1	10537	2	-1.6602	0.028999	0.071255	0.980541	1346	2	-1.6602
H1FOO	4	0.99449	0.99452	1	18980	0	0.69065	0.029031	0.071319	0.980541	1347	3	0.69065
PFDN4	4	0.99295	0.99297	1	18946	0	0.76134	0.029037	0.071331	0.980541	1348	3	0.76134
PDP2	4	0.30001	0.5179	1	9623	2	-2.2663	0.029083	0.071447	0.980541	1349	2	-2.2663
PRDX4	4	0.84763	0.87499	1	16597	1	0.58589	0.029086	0.071454	0.980541	1350	2	0.58589
ZNF598	4	0.047674	0.13848	0.947271	2727	2	-0.088054	0.029096	0.071474	0.980541	1351	2	-0.088054
JMJD1C	4	0.85328	0.8779	1	16657	1	0.74281	0.029134	0.071565	0.980541	1352	3	0.74281
PKN1	4	0.68712	0.81327	1	15253	1	-0.80492	0.029189	0.071698	0.980541	1353	1	-0.80492
ZACN	4	0.44834	0.63131	1	11892	1	0.97721	0.029193	0.071706	0.980541	1354	3	0.97721
CCDC178	4	0.74986	0.83376	1	15743	1	0.69604	0.029193	0.071706	0.980541	1355	3	0.69604
SFT2D1	4	0.85895	0.88094	1	16719	1	1.2773	0.029204	0.071728	0.980541	1356	3	1.2773
ZNF621	4	0.15641	0.32246	1	6096	1	0.81684	0.029215	0.071754	0.980541	1357	3	0.81684
SSBP2	4	0.81112	0.85782	1	16234	1	0.61471	0.02929	0.071914	0.980541	1358	2	0.61471
CCNB1	4	0.42103	0.61154	1	11513	1	-3.7363	0.029294	0.071926	0.980541	1359	1	-3.7363
C20orf203	3	0.3339	0.4879	1	10212	1	2.1172	0.029318	0.057255	0.980541	1360	2	2.1172
LOC100507462	1	0.97067	0.97081	1	18465	0	2.8658	0.029332	0.02926	0.964891	1361	1	2.8658
CLDN15	4	0.63127	0.76954	1	14455	2	-4.4832	0.029374	0.072104	0.980541	1362	1	-4.4832
POTEB	4	0.66899	0.79895	1	15030	2	-3.3301	0.029374	0.072104	0.980541	1363	1	-3.3301
CRY2	4	0.52034	0.68494	1	12946	1	1.1143	0.029411	0.072184	0.980541	1364	3	1.1143
GNAQ	4	0.028819	0.088491	0.917463	1787	1	0.54381	0.029481	0.072352	0.980541	1365	3	0.54381
ELOVL2	4	0.75638	0.83612	1	15798	1	0.95202	0.029558	0.07252	0.980541	1366	3	0.95202
BICD2	4	0.4874	0.66027	1	12491	2	-4.6967	0.029558	0.072521	0.980541	1367	1	-4.6967
GRAMD1B	4	0.27747	0.48918	1	9086	1	0.93791	0.02958	0.072575	0.980541	1368	3	0.93791
FAM102B	4	0.12093	0.26895	0.980932	5196	2	-4.6858	0.029611	0.072614	0.980541	1369	1	-4.6858
SLCO3A1	4	0.065465	0.18022	0.965596	3503	2	-1.7874	0.029664	0.072699	0.980541	1370	2	-1.7874
AFTPH	4	0.56366	0.71749	1	13531	2	-1.3716	0.029679	0.072718	0.980541	1371	2	-1.3716
NEURL3	3	0.86067	0.86121	1	16753	1	-2.3888	0.029694	0.057873	0.980541	1372	1	-2.3888
SMKR1	4	0.91491	0.9175	1	17454	1	-0.1611	0.029717	0.072777	0.980541	1373	1	-0.1611
KLK1	4	0.44513	0.62898	1	11849	2	-1.582	0.029751	0.072819	0.980541	1374	2	-1.582
AGMAT	4	0.20636	0.39399	1	7350	3	-5.214	0.02977	0.072863	0.980541	1375	1	-5.214
HKR1	4	0.68718	0.81331	1	15292	2	-1.1108	0.029802	0.072913	0.980541	1376	2	-1.1108
IFNA6	4	0.17203	0.34533	1	6508	2	-4.2532	0.029928	0.073083	0.980541	1377	1	-4.2532
SLC35E1	3	0.27613	0.42814	1	9020	1	1.8416	0.029984	0.058318	0.980541	1378	2	1.8416
SALL3	4	0.87351	0.88933	1	16904	1	-0.77914	0.029998	0.073183	0.980541	1379	2	-0.77914
LGALS3	4	0.0042802	0.014943	0.78853	347	3	-7.4215	0.030034	0.073238	0.980541	1380	1	-7.4215
METAP1	4	0.55801	0.7132	1	13439	2	-4.5609	0.030086	0.073306	0.980541	1381	1	-4.5609
SUV420H2	4	0.58162	0.7312	1	13806	2	-1.3682	0.030133	0.073375	0.980541	1382	2	-1.3682
FCER2	4	0.057819	0.16376	0.964638	3169	3	-6.2239	0.030139	0.073384	0.980541	1383	1	-6.2239
GATA5	4	0.20994	0.39902	1	7433	2	-5.3339	0.030192	0.073455	0.980541	1384	1	-5.3339
EXOSC8	3	0.5653	0.682	1	13566	1	-2.5335	0.03021	0.058702	0.980541	1385	1	-2.5335
REG4	3	0.11811	0.25443	0.977779	5126	1	1.5792	0.030225	0.058721	0.980541	1386	2	1.5792
RECQL4	4	0.47914	0.65416	1	12363	1	-1.3351	0.030245	0.073536	0.980541	1387	1	-1.3351
UBL7	4	0.024638	0.076837	0.914651	1568	2	-3.4962	0.030403	0.073762	0.980541	1388	1	-3.4962
NBPF8	3	0.90971	0.90983	1	17348	0	1.1194	0.030409	0.05899	0.980541	1389	2	1.1194
UCHL3	4	0.43379	0.62083	1	11677	2	-2.9272	0.030456	0.073834	0.980541	1390	1	-2.9272
JAK3	4	0.56366	0.71749	1	13543	2	-1.1739	0.030464	0.073844	0.980541	1391	2	-1.1739
TCTEX1D2	4	0.95764	0.95766	1	18233	0	1.2211	0.030509	0.073905	0.980541	1392	2	1.2211
MYO1D	4	0.81717	0.86047	1	16288	1	1.1923	0.030527	0.073928	0.980541	1393	2	1.1923
HMGB1	4	0.46003	0.64001	1	12057	2	-1.5869	0.030589	0.07402	0.980541	1394	2	-1.5869
RAB43	4	0.12489	0.27502	0.98119	5298	2	-1.7747	0.0306	0.074042	0.980541	1395	2	-1.7747
RAB38	4	0.17173	0.34491	1	6480	3	-4.4743	0.030614	0.074065	0.980541	1396	1	-4.4743
CFAP69	4	0.41828	0.60955	1	11471	1	0.93163	0.030709	0.074209	0.980541	1397	2	0.93163
SERPINB6	4	0.88122	0.89391	1	16960	1	-0.0081894	0.03072	0.074217	0.980541	1398	2	-0.0081894
IZUMO4	4	0.17326	0.3471	1	6532	2	-0.88899	0.030751	0.074261	0.980541	1399	2	-0.88899
ANO3	4	0.01954	0.062347	0.897756	1307	1	0.3978	0.030808	0.074333	0.980541	1400	2	0.3978
HMGN2	4	0.35196	0.56172	1	10469	2	-3.1905	0.030825	0.074359	0.980541	1401	1	-3.1905
C6orf223	3	0.27078	0.42253	1	8873	1	0.37494	0.030885	0.059729	0.980541	1402	1	0.37494
NFATC2IP	4	0.16611	0.33675	1	6374	2	-1.442	0.030908	0.07448	0.980541	1403	2	-1.442
AKAP12	4	0.63733	0.77417	1	14573	2	-1.05	0.030965	0.074577	0.980541	1404	2	-1.05
GTSF1L	4	0.0040366	0.014124	0.785157	334	2	-3.4647	0.03101	0.074642	0.980541	1405	1	-3.4647
PPCS	4	0.15811	0.32503	1	6143	3	-5.3884	0.03101	0.074642	0.980541	1406	1	-5.3884
SLC7A2	4	0.48064	0.65525	1	12388	1	1.5411	0.03106	0.074709	0.980541	1407	2	1.5411
STAG1	4	0.16175	0.33034	1	6247	2	-1.029	0.03106	0.074709	0.980541	1408	2	-1.029
ARL15	4	0.15038	0.31346	1	5943	2	-3.2764	0.031089	0.07476	0.980541	1409	1	-3.2764
OSGEP	3	0.28188	0.4341	1	9151	1	1.516	0.03113	0.060115	0.980541	1410	2	1.516
CCNK	4	0.97069	0.97076	1	18468	0	0.42987	0.031142	0.074835	0.980541	1411	2	0.42987
ZDHHC13	4	0.23139	0.42826	1	7987	2	-1.2143	0.031175	0.074886	0.980541	1412	2	-1.2143
TRIM49D2	3	0.75441	0.78062	1	15782	1	1.2966	0.031182	0.060204	0.980541	1413	2	1.2966
ADGRF1	4	0.33972	0.55299	1	10299	2	-4.1258	0.031194	0.074907	0.980541	1414	1	-4.1258
TIMM17B	4	0.96134	0.96132	1	18297	0	0.78874	0.031196	0.074912	0.980541	1415	2	0.78874
HDGF	3	0.35221	0.50669	1	10506	1	1.6148	0.031283	0.060364	0.980541	1416	2	1.6148
CREB3L2	4	0.097312	0.2322	0.975053	4492	3	-6.1111	0.0313	0.075054	0.980541	1417	1	-6.1111
TNFSF13B	4	0.47763	0.65301	1	12352	1	1.2911	0.031301	0.075056	0.980541	1418	2	1.2911
OSCAR	4	0.91731	0.91944	1	17470	1	-0.5391	0.031349	0.07512	0.980541	1419	2	-0.5391
MEIS1	4	0.46597	0.6443	1	12162	2	-3.288	0.031353	0.075126	0.980541	1420	1	-3.288
C9orf89	4	0.46906	0.64664	1	12194	1	0.86049	0.031405	0.075197	0.980541	1421	2	0.86049
CSF2RA	4	0.23162	0.42859	1	7990	2	-3.0231	0.031458	0.075261	0.980541	1422	1	-3.0231
ZC3H12D	4	0.10774	0.24842	0.977779	4785	2	-2.4509	0.031511	0.075343	0.980541	1423	2	-2.4509
IGSF1	4	0.9537	0.95373	1	18146	0	0.2583	0.031563	0.075415	0.980541	1424	2	0.2583
SIGLEC10	4	0.37879	0.5809	1	10925	2	-0.68996	0.031612	0.075481	0.980541	1425	2	-0.68996
TOMM20	4	0.16965	0.34187	1	6436	2	-2.1725	0.03166	0.075541	0.980541	1426	2	-2.1725
KRAS	4	0.66708	0.79744	1	14962	1	0.12871	0.031669	0.075555	0.980541	1427	2	0.12871
SLC22A9	4	0.36066	0.56791	1	10602	2	-4.3847	0.031774	0.075688	0.980541	1428	1	-4.3847
DCT	4	0.86017	0.88163	1	16749	1	0.88326	0.031808	0.075735	0.980541	1429	2	0.88326
RRP9	3	0.40071	0.55588	1	11216	2	-4.9577	0.031836	0.061239	0.980541	1430	1	-4.9577
HIST1H1D	4	0.36559	0.57148	1	10703	1	1.0599	0.031903	0.075865	0.980541	1431	2	1.0599
SEMA4G	4	0.028819	0.088491	0.917463	1786	1	-1.4491	0.031932	0.075904	0.980541	1432	1	-1.4491
SLC1A5	4	0.98572	0.98569	1	18798	0	1.2532	0.032041	0.076045	0.980541	1433	2	1.2532
CIT	4	0.19845	0.38283	1	7178	2	-2.8407	0.032064	0.076078	0.980541	1434	2	-2.8407
LGMN	4	0.79421	0.85068	1	16106	1	-0.6811	0.032064	0.076078	0.980541	1435	1	-0.6811
SMARCA4	4	0.66221	0.7936	1	14914	2	-1.3368	0.032064	0.076078	0.980541	1436	2	-1.3368
CXCL2	4	0.79235	0.84993	1	16096	1	0.26818	0.032064	0.076078	0.980541	1437	2	0.26818
EMC8	4	0.95072	0.95077	1	18079	0	0.42804	0.032148	0.07621	0.980541	1438	2	0.42804
TCEB3CL2	4	0.71291	0.82136	1	15479	1	-3.6196	0.032249	0.076366	0.980541	1439	1	-3.6196
METTL2B	4	0.76273	0.8384	1	15828	1	-2.8225	0.032301	0.076446	0.980541	1440	1	-2.8225
OR51B4	4	0.47181	0.64867	1	12255	1	0.78029	0.03235	0.07651	0.980541	1441	2	0.78029
CYP1A1	4	0.94664	0.94669	1	17996	0	-0.267	0.032479	0.076693	0.980541	1442	2	-0.267
MEGF11	4	0.31115	0.53184	1	9863	2	-3.7692	0.032512	0.076744	0.980541	1443	1	-3.7692
RARRES2	4	0.37423	0.57769	1	10829	2	-1.7269	0.032527	0.076766	0.980541	1444	2	-1.7269
ERLIN1	4	0.77938	0.84471	1	15953	1	-1.0848	0.032565	0.076824	0.980541	1445	2	-1.0848
ASRGL1	4	0.56366	0.71749	1	13562	2	-1.3141	0.03265	0.076929	0.980541	1446	2	-1.3141
PFN3	4	0.29144	0.5071	1	9405	2	-2.0676	0.03267	0.076955	0.980541	1447	2	-2.0676
ADCY8	4	0.34125	0.55408	1	10335	1	0.70274	0.032703	0.077005	0.980541	1448	2	0.70274
GALR1	4	0.63733	0.77417	1	14562	2	-3.9587	0.032723	0.077037	0.980541	1449	1	-3.9587
TSPAN31	4	0.60682	0.75062	1	14113	2	-1.3051	0.032775	0.077109	0.980541	1450	2	-1.3051
ISL2	4	0.23306	0.43054	1	8032	1	0.82301	0.032789	0.077129	0.980541	1451	2	0.82301
STIL	3	0.038875	0.09541	0.917463	2306	2	-6.9991	0.032827	0.062809	0.980541	1452	1	-6.9991
FAM171A1	4	0.068047	0.18446	0.965596	3584	2	-2.9537	0.032828	0.077181	0.980541	1453	1	-2.9537
CHMP3	4	0.42061	0.61122	1	11497	2	-2.4549	0.032881	0.077254	0.980541	1454	2	-2.4549
KANSL1	4	0.57226	0.72394	1	13675	1	-0.54385	0.032929	0.077324	0.980541	1455	2	-0.54385
ZNF879	4	0.37005	0.57467	1	10760	2	-3.2898	0.032933	0.077335	0.980541	1456	1	-3.2898
PLOD1	4	0.38775	0.58737	1	11035	2	-3.8397	0.032986	0.077401	0.980541	1457	1	-3.8397
TMEM143	4	0.63079	0.76918	1	14447	1	-0.7647	0.032994	0.077411	0.980541	1458	2	-0.7647
LIG1	4	0.66846	0.79853	1	15012	2	-4.1963	0.033039	0.077475	0.980541	1459	1	-4.1963
AEBP1	4	0.20263	0.38873	1	7288	1	-0.78583	0.033048	0.077486	0.980541	1460	2	-0.78583
TBCE	3	0.96016	0.96043	1	18273	0	-0.10483	0.033065	0.063208	0.980541	1461	1	-0.10483
CCDC106	4	0.60996	0.75303	1	14175	1	0.50343	0.03308	0.077527	0.980541	1462	2	0.50343
KRT27	3	0.32022	0.47387	1	10027	1	1.8303	0.033114	0.063283	0.980541	1463	2	1.8303
RAG1	4	0.020079	0.063924	0.900651	1331	3	-6.9653	0.033144	0.077629	0.980541	1464	1	-6.9653
ZDHHC16	4	0.86464	0.88417	1	16798	1	0.026898	0.033249	0.077767	0.980541	1465	2	0.026898
PCK2	4	0.99047	0.99046	1	18888	0	1.0455	0.033296	0.077851	0.980541	1466	2	1.0455
ANO8	4	0.30001	0.5179	1	9617	2	-2.5702	0.033302	0.07786	0.980541	1467	2	-2.5702
SNAPC5	3	0.10495	0.23027	0.974676	4704	1	1.5929	0.033315	0.06359	0.980541	1468	2	1.5929
C11orf74	4	0.056571	0.16083	0.964638	3121	3	-6.2048	0.033355	0.077939	0.980541	1469	1	-6.2048
MAK	4	0.37005	0.57467	1	10767	2	-1.8852	0.033355	0.077941	0.980541	1470	2	-1.8852
RFX3	4	0.10806	0.24893	0.977779	4794	1	1.063	0.033393	0.077993	0.980541	1471	2	1.063
FCGRT	4	0.31936	0.53844	1	10002	2	-3.5707	0.03346	0.078092	0.980541	1472	1	-3.5707
FSCN1	4	0.93739	0.93749	1	17828	1	-1.4076	0.033513	0.078165	0.980541	1473	2	-1.4076
C1QTNF9	4	0.71622	0.82242	1	15501	1	-0.60583	0.033565	0.078239	0.980541	1474	1	-0.60583
LOC100144595	2	0.80503	0.80448	1	16210	0	1.0733	0.033614	0.061173	0.980541	1475	1	1.0733
LCN10	4	0.025879	0.080282	0.914651	1638	3	-6.6677	0.033618	0.078315	0.980541	1476	1	-6.6677
LATS2	4	0.39252	0.59084	1	11123	2	-4.8344	0.033671	0.078383	0.980541	1477	1	-4.8344
EXT1	4	0.41554	0.60756	1	11426	1	0.75111	0.033686	0.078403	0.980541	1478	2	0.75111
SMPDL3B	4	0.71802	0.82301	1	15508	1	0.75175	0.033723	0.078455	0.980541	1479	2	0.75175
PRR27	4	0.98942	0.9894	1	18874	0	1.267	0.033735	0.078471	0.980541	1480	2	1.267
FZD7	3	0.7204	0.75983	1	15527	1	-2.2185	0.033738	0.064272	0.980541	1481	1	-2.2185
MAFA	4	0.84476	0.87351	1	16568	1	0.81739	0.033762	0.078512	0.980541	1482	2	0.81739
KRTAP4-3	4	0.11768	0.26392	0.977779	5087	2	-3.488	0.033776	0.07853	0.980541	1483	1	-3.488
RHEBL1	4	0.90906	0.91295	1	17344	1	0.40078	0.033806	0.078566	0.980541	1484	2	0.40078
PIGX	4	0.37348	0.57715	1	10825	2	-2.6974	0.033828	0.078602	0.980541	1485	1	-2.6974
FBXO21	4	0.070715	0.18886	0.965596	3675	2	-2.5632	0.033849	0.078634	0.980541	1486	2	-2.5632
BCHE	4	0.28408	0.49773	1	9248	2	-1.3052	0.03386	0.07865	0.980541	1487	2	-1.3052
SIGLEC5	3	0.88755	0.88766	1	17072	0	0.81332	0.033896	0.064521	0.980541	1488	2	0.81332
EMC4	4	0.1873	0.36714	1	6911	2	-3.5477	0.033907	0.078716	0.980541	1489	1	-3.5477
MAP2K4	4	0.70976	0.82033	1	15442	1	-0.95039	0.033947	0.078786	0.980541	1490	2	-0.95039
RDH14	4	0.84876	0.87556	1	16602	1	0.76812	0.033969	0.078811	0.980541	1491	2	0.76812
COPZ2	4	0.22587	0.4208	1	7857	1	0.92715	0.03398	0.078828	0.980541	1492	2	0.92715
SEMA3D	4	0.016167	0.052496	0.887479	1109	2	-3.7752	0.033986	0.078835	0.980541	1493	1	-3.7752
OR6C70	4	0.94481	0.94485	1	17967	0	0.34582	0.034067	0.07896	0.980541	1494	2	0.34582
ATP1A4	4	0.15242	0.31648	1	6009	2	-2.8266	0.034092	0.078998	0.980541	1495	2	-2.8266
TREX2	4	0.69686	0.81636	1	15360	1	-1.1277	0.034095	0.079001	0.980541	1496	2	-1.1277
ZBTB5	4	0.55801	0.7132	1	13442	2	-4.103	0.034144	0.079074	0.980541	1497	1	-4.103
MX2	4	0.9725	0.97264	1	18518	0	0.67021	0.034155	0.07909	0.980541	1498	2	0.67021
MSL2	4	0.12389	0.27348	0.98119	5276	2	-1.7132	0.034187	0.07914	0.980541	1499	2	-1.7132
FA2H	4	0.34598	0.55744	1	10390	2	-2.8325	0.034197	0.079147	0.980541	1500	1	-2.8325
HNRNPR	4	0.9297	0.93016	1	17695	1	-1.6649	0.034302	0.079287	0.980541	1501	1	-1.6649
IREB2	4	0.36313	0.56968	1	10646	1	0.16436	0.034355	0.079369	0.980541	1502	2	0.16436
ZBED1	4	0.95853	0.95855	1	18241	0	0.27138	0.034401	0.07944	0.980541	1503	2	0.27138
SLITRK6	4	0.060946	0.17135	0.96493	3335	3	-5.1181	0.034407	0.079447	0.980541	1504	1	-5.1181
APBA3	4	0.69057	0.81453	1	15316	1	1.2363	0.034439	0.079487	0.980541	1505	2	1.2363
KRT86	4	0.090935	0.22201	0.971209	4307	1	0.72801	0.03446	0.079512	0.980541	1506	2	0.72801
RUVBL2	3	0.6961	0.74592	1	15359	1	-4.2051	0.03449	0.06547	0.980541	1507	1	-4.2051
VEGFC	4	0.0034519	0.01216	0.767282	294	1	0.99541	0.034512	0.079585	0.980541	1508	2	0.99541
NSMCE2	4	0.66846	0.79853	1	14985	2	-3.6561	0.034565	0.079656	0.980541	1509	1	-3.6561
RBM43	4	0.54181	0.70093	1	13242	2	-1.4936	0.034571	0.079663	0.980541	1510	2	-1.4936
ADIPOR2	4	0.30324	0.52189	1	9662	1	0.68353	0.034593	0.079695	0.980541	1511	2	0.68353
WDR6	4	0.37423	0.57769	1	10832	2	-1.7116	0.034604	0.079706	0.980541	1512	2	-1.7116
SGPP1	4	0.12799	0.27975	0.983339	5405	3	-5.6413	0.034618	0.079724	0.980541	1513	1	-5.6413
FAM118A	4	0.10473	0.24371	0.977779	4688	1	1.534	0.034659	0.079784	0.980541	1514	2	1.534
GPATCH1	4	0.38775	0.58737	1	11046	2	-4.9941	0.03467	0.079801	0.980541	1515	1	-4.9941
ARHGAP40	4	0.35871	0.56649	1	10585	1	-2.3408	0.034723	0.079878	0.980541	1516	1	-2.3408
STK26	4	0.20701	0.39491	1	7388	2	-2.3692	0.034828	0.080039	0.980541	1517	2	-2.3692
AHNAK2	4	0.31218	0.53314	1	9898	3	-4.9822	0.034907	0.080158	0.980541	1518	1	-4.9822
ATP6AP1	4	0.68073	0.80823	1	15203	2	-3.6761	0.034907	0.080158	0.980541	1519	1	-3.6761
CETN2	4	0.55019	0.70726	1	13365	2	-1.1504	0.034929	0.080179	0.980541	1520	2	-1.1504
SLC29A3	4	0.1185	0.26516	0.979598	5129	1	-0.079495	0.034986	0.080255	0.980541	1521	2	-0.079495
ZNF792	4	0.44834	0.63131	1	11896	2	-1.7151	0.03499	0.080264	0.980541	1522	2	-1.7151
PACRG	4	0.18881	0.36927	1	6936	1	-0.038621	0.035038	0.08034	0.980541	1523	2	-0.038621
GBP5	4	0.26199	0.46916	1	8701	2	-2.1273	0.035056	0.080366	0.980541	1524	2	-2.1273
CTAG1A	4	0.56366	0.71749	1	13534	2	-4.2639	0.035091	0.080413	0.980541	1525	1	-4.2639
TACSTD2	4	0.88122	0.89391	1	16959	1	0.4667	0.035095	0.08042	0.980541	1526	2	0.4667
RNMT	3	0.99081	0.99094	1	18901	0	1.7989	0.035137	0.066523	0.980541	1527	2	1.7989
HIST1H3B	4	0.93961	0.93973	1	17885	0	-1.4801	0.035144	0.080494	0.980541	1528	1	-1.4801
DYRK1A	4	0.97191	0.97206	1	18506	0	1.2535	0.035145	0.080499	0.980541	1529	2	1.2535
CLEC18B	4	0.63079	0.76918	1	14441	1	0.4132	0.035196	0.080576	0.980541	1530	2	0.4132
CENPW	4	0.23288	0.43029	1	8026	2	-2.158	0.035211	0.080597	0.980541	1531	2	-2.158
DLG1	3	0.8541	0.85523	1	16672	1	-0.62654	0.035222	0.066668	0.980541	1532	1	-0.62654
RPAIN	4	0.81717	0.86047	1	16296	1	-1.3881	0.035249	0.080654	0.980541	1533	2	-1.3881
RHOF	4	0.24235	0.44299	1	8278	3	-4.427	0.035354	0.080807	0.980541	1534	1	-4.427
GAGE12C	4	0.33477	0.5494	1	10222	1	-2.7834	0.035511	0.08102	0.980541	1535	1	-2.7834
PYCR1	4	0.99642	0.99644	1	19024	0	1.3634	0.035528	0.081047	0.980541	1536	2	1.3634
KRT71	4	0.09174	0.22333	0.971209	4333	2	-3.3841	0.035564	0.081097	0.980541	1537	1	-3.3841
ZNF567	4	0.79235	0.84993	1	16092	1	0.062444	0.035589	0.081125	0.980541	1538	2	0.062444
DDX55	4	0.66846	0.79853	1	14988	2	-2.2382	0.035617	0.081161	0.980541	1539	1	-2.2382
OMP	4	0.27527	0.48632	1	8997	2	-1.9926	0.035622	0.08117	0.980541	1540	2	-1.9926
GDPD4	4	0.33562	0.55003	1	10241	2	-3.3451	0.035669	0.081236	0.980541	1541	1	-3.3451
LOC100132146	4	0.64699	0.78174	1	14688	1	1.1913	0.035689	0.081263	0.980541	1542	2	1.1913
CYP4F11	4	0.14581	0.30664	0.99859	5835	2	-1.5375	0.0357	0.081275	0.980541	1543	2	-1.5375
TMEM89	4	0.4919	0.66364	1	12564	2	-1.49	0.035711	0.081293	0.980541	1544	2	-1.49
CPTP	4	0.80151	0.85372	1	16160	1	-0.53318	0.035722	0.081305	0.980541	1545	2	-0.53318
STK19	4	0.88636	0.89717	1	17065	1	0.68102	0.035745	0.081333	0.980541	1546	2	0.68102
HEATR4	4	0.40725	0.60154	1	11330	2	-2.7963	0.035774	0.081374	0.980541	1547	1	-2.7963
TTBK1	4	0.46515	0.64369	1	12124	2	-1.5779	0.035812	0.081432	0.980541	1548	2	-1.5779
CALM1	4	0.47645	0.65218	1	12338	2	-1.6132	0.035823	0.081446	0.980541	1549	2	-1.6132
CHP2	4	0.019462	0.062143	0.897756	1303	3	-5.7083	0.035827	0.08145	0.980541	1550	1	-5.7083
PCDH11X	4	0.34598	0.55744	1	10396	2	-1.707	0.03584	0.081467	0.980541	1551	2	-1.707
ACACA	4	0.70019	0.8174	1	15383	1	1.0205	0.035867	0.081505	0.980541	1552	2	1.0205
NPC1L1	3	0.7204	0.75983	1	15528	1	1.6964	0.035885	0.067701	0.980541	1553	2	1.6964
NCAPH	4	0.9883	0.9883	1	18852	0	0.66969	0.035901	0.081551	0.980541	1554	2	0.66969
GTPBP4	3	0.8458	0.84792	1	16582	1	1.9625	0.035967	0.067841	0.980541	1555	2	1.9625
OBSCN	4	0.98684	0.98678	1	18818	0	0.92403	0.035968	0.081645	0.980541	1556	2	0.92403
CNRIP1	4	0.99567	0.99565	1	19011	0	1.1018	0.03599	0.081675	0.980541	1557	2	1.1018
ABCF3	4	0.78268	0.84607	1	15987	1	0.05434	0.036007	0.081697	0.980541	1558	2	0.05434
SPIB	4	0.33562	0.55003	1	10254	2	-4.4246	0.036011	0.081702	0.980541	1559	1	-4.4246
ADCY6	3	0.6463	0.71981	1	14672	1	2.1002	0.03602	0.067924	0.980541	1560	2	2.1002
SERPINB7	4	0.91963	0.92138	1	17536	1	0.0087315	0.03609	0.081829	0.980541	1561	1	0.0087315
NFE2L1	4	0.1127	0.25627	0.977779	4925	2	-2.3628	0.036097	0.081837	0.980541	1562	2	-2.3628
MEI4	4	0.028291	0.087011	0.917463	1774	1	-1.0909	0.036142	0.081889	0.980541	1563	1	-1.0909
OR10R2	4	0.14842	0.31056	1	5873	2	-1.4099	0.036192	0.081973	0.980541	1564	2	-1.4099
RINT1	4	0.19378	0.37623	1	7051	1	-2.6505	0.036195	0.081977	0.980541	1565	1	-2.6505
NYX	4	0.0091095	0.030607	0.850487	669	2	-2.868	0.036214	0.082001	0.980541	1566	2	-2.868
AKR1D1	4	0.371	0.57535	1	10797	1	-1.7546	0.036247	0.082053	0.980541	1567	1	-1.7546
BNIP2	4	0.9417	0.94178	1	17907	0	0.34942	0.036428	0.082308	0.980541	1568	2	0.34942
C6orf118	4	0.72948	0.82674	1	15579	1	-1.2336	0.036457	0.082351	0.980541	1569	1	-1.2336
CTRL	4	0.72299	0.82465	1	15538	1	0.37954	0.036484	0.082391	0.980541	1570	2	0.37954
PRG2	4	0.031007	0.09459	0.917463	1916	3	-6.6486	0.036562	0.082518	0.980541	1571	1	-6.6486
TMEM44	4	0.2859	0.50003	1	9273	1	1.4987	0.036608	0.08259	0.980541	1572	2	1.4987
SPATA31E1	4	0.96134	0.96132	1	18305	0	-1.0871	0.036615	0.082597	0.980541	1573	1	-1.0871
VNN2	4	0.0015383	0.0054896	0.693341	148	2	-4.5584	0.036667	0.082668	0.980541	1574	1	-4.5584
HYDIN	4	0.022463	0.070709	0.910791	1447	2	-2.6714	0.036687	0.082704	0.980541	1575	2	-2.6714
SERPINB9	4	0.56594	0.7192	1	13572	2	-2.4008	0.03672	0.082737	0.980541	1576	1	-2.4008
CST1	4	0.68073	0.80823	1	15205	2	-1.1418	0.036721	0.082739	0.980541	1577	2	-1.1418
FMNL2	4	0.51718	0.68252	1	12889	2	-2.1005	0.036825	0.082896	0.980541	1578	1	-2.1005
CHMP7	4	0.66846	0.79853	1	14987	2	-1.3339	0.036867	0.082959	0.980541	1579	2	-1.3339
GUCA1B	4	0.97619	0.9764	1	18607	0	0.95538	0.036879	0.082984	0.980541	1580	2	0.95538
CYP2A13	4	0.49587	0.66663	1	12611	1	-0.69803	0.03689	0.083002	0.980541	1581	2	-0.69803
PSME2	4	0.97614	0.97634	1	18605	0	1.0044	0.036982	0.083132	0.980541	1582	2	1.0044
MEPE	4	0.18341	0.36158	1	6786	3	-5.5828	0.037035	0.083207	0.980541	1583	1	-5.5828
ALKBH1	4	0.56366	0.71749	1	13564	2	-1.3098	0.03706	0.083234	0.980541	1584	2	-1.3098
ERP27	4	0.81112	0.85782	1	16237	1	0.98793	0.037087	0.083276	0.980541	1585	2	0.98793
FZD8	4	0.63717	0.77403	1	14539	1	0.3954	0.037196	0.083435	0.980541	1586	2	0.3954
TRNP1	4	0.62013	0.76089	1	14320	1	0.81288	0.037219	0.083474	0.980541	1587	2	0.81288
NTPCR	4	0.58162	0.7312	1	13793	2	-1.8673	0.037245	0.083519	0.980541	1588	2	-1.8673
MEDAG	4	0.34598	0.55744	1	10399	1	-2.4619	0.037297	0.083587	0.980541	1589	1	-2.4619
CDH26	4	0.47076	0.6479	1	12220	2	-2.2901	0.037402	0.083728	0.980541	1590	2	-2.2901
SIX4	4	0.96513	0.96518	1	18373	0	-0.60207	0.037455	0.083797	0.980541	1591	1	-0.60207
TBL2	4	0.10077	0.23753	0.977089	4599	1	1.0491	0.037457	0.083799	0.980541	1592	2	1.0491
NSUN7	4	0.59424	0.7409	1	13973	2	-1.5272	0.03748	0.08383	0.980541	1593	2	-1.5272
RASA3	4	0.98504	0.98503	1	18781	0	0.59958	0.037514	0.08388	0.980541	1594	2	0.59958
NR1H4	4	0.041985	0.12392	0.930434	2496	2	-2.6095	0.037526	0.083893	0.980541	1595	2	-2.6095
KRTCAP2	4	0.097312	0.2322	0.975053	4494	3	-4.7758	0.03756	0.083943	0.980541	1596	1	-4.7758
ZNF521	4	0.97466	0.9748	1	18572	0	-0.81024	0.037612	0.084006	0.980541	1597	1	-0.81024
EXTL3	4	0.25233	0.45637	1	8492	2	-0.84845	0.037662	0.084072	0.980541	1598	2	-0.84845
SMIM8	4	0.90396	0.90918	1	17289	1	0.68218	0.037674	0.084083	0.980541	1599	2	0.68218
SCN2A	4	0.96051	0.96054	1	18283	0	0.31014	0.037717	0.084145	0.980541	1600	2	0.31014
LRRC10	4	0.48638	0.65952	1	12482	2	-1.6382	0.037754	0.084188	0.980541	1601	2	-1.6382
C17orf58	4	0.47462	0.65078	1	12275	2	-4.3454	0.03777	0.084212	0.980541	1602	1	-4.3454
TRMT44	4	0.43107	0.61885	1	11650	2	-0.36182	0.037771	0.084213	0.980541	1603	2	-0.36182
PAXIP1	4	0.85027	0.87633	1	16642	1	1.2076	0.037771	0.084213	0.980541	1604	2	1.2076
PRR23B	4	0.62508	0.76476	1	14383	2	-1.708	0.037822	0.084295	0.980541	1605	2	-1.708
SOST	4	0.9102	0.91381	1	17372	1	0.88051	0.037914	0.084423	0.980541	1606	2	0.88051
ORMDL1	4	0.010248	0.034199	0.864379	745	2	-2.8683	0.037927	0.084442	0.980541	1607	1	-2.8683
CDY2B	4	0.069966	0.18765	0.965596	3647	1	0.76946	0.038028	0.084578	0.980541	1608	2	0.76946
ICK	4	0.14691	0.30828	1	5854	2	-4.69	0.038032	0.084585	0.980541	1609	1	-4.69
FRG1	4	0.60078	0.74596	1	14063	1	-0.79617	0.038051	0.084614	0.980541	1610	2	-0.79617
FADS1	4	0.14543	0.30608	0.998569	5806	3	-5.8116	0.038084	0.084652	0.980541	1611	1	-5.8116
VSTM2L	4	0.069966	0.18765	0.965596	3643	2	-2.2164	0.038097	0.084664	0.980541	1612	2	-2.2164
KLHL24	3	0.070456	0.16279	0.964638	3659	2	-6.7233	0.038125	0.071267	0.980541	1613	1	-6.7233
BRINP2	4	0.42527	0.61467	1	11575	2	-3.9782	0.038137	0.084729	0.980541	1614	1	-3.9782
PSMB8	4	0.82322	0.86323	1	16353	1	0.0056926	0.038154	0.084754	0.980541	1615	2	0.0056926
PRKAG3	3	0.94529	0.94551	1	17971	0	-1.7681	0.038204	0.071392	0.980541	1616	1	-1.7681
C11orf53	4	0.96266	0.96268	1	18322	0	0.18579	0.038229	0.084852	0.980541	1617	2	0.18579
R3HDM4	4	0.86747	0.88578	1	16844	1	-0.43928	0.038242	0.084868	0.980541	1618	2	-0.43928
MIR205HG	3	0.93354	0.93372	1	17770	0	1.5857	0.038264	0.071487	0.980541	1619	2	1.5857
C8orf4	4	0.60996	0.75303	1	14183	1	-1.2017	0.038269	0.084903	0.980541	1620	2	-1.2017
ADH4	4	0.15641	0.32246	1	6110	2	-2.0997	0.038338	0.084992	0.980541	1621	2	-2.0997
TTC36	4	0.65007	0.78417	1	14738	1	-0.82116	0.038347	0.085013	0.980541	1622	2	-0.82116
ARMC10	4	0.15317	0.31763	1	6017	1	0.45371	0.038384	0.085068	0.980541	1623	2	0.45371
LDHD	4	0.61323	0.75557	1	14243	2	-1.3634	0.038396	0.085081	0.980541	1624	2	-1.3634
TBC1D8	4	0.58803	0.73612	1	13893	2	-1.8035	0.038452	0.085174	0.980541	1625	2	-1.8035
PROKR1	4	0.48638	0.65952	1	12474	2	-3.0299	0.038504	0.085241	0.980541	1626	1	-3.0299
BAP1	3	0.71349	0.75578	1	15482	1	-3.2359	0.03852	0.071881	0.980541	1627	1	-3.2359
VAV3	4	0.92754	0.92824	1	17656	1	0.056318	0.038545	0.085304	0.980541	1628	2	0.056318
OSBP2	4	0.30549	0.52474	1	9703	2	-0.82249	0.038649	0.085459	0.980541	1629	2	-0.82249
DHX32	4	0.084271	0.21121	0.969295	4098	2	-2.0654	0.038695	0.085524	0.980541	1630	2	-2.0654
PFDN2	3	0.7879	0.80299	1	16052	1	-2.4791	0.038717	0.072201	0.980541	1631	1	-2.4791
FCAR	4	0.89972	0.90613	1	17226	1	0.82105	0.03873	0.08557	0.980541	1632	2	0.82105
PRSS58	4	0.4919	0.66364	1	12569	2	-1.9724	0.038766	0.085628	0.980541	1633	1	-1.9724
PACSIN3	4	0.98018	0.98027	1	18680	0	0.81936	0.038788	0.085658	0.980541	1634	2	0.81936
UPF2	4	0.01613	0.05239	0.887479	1103	2	-3.4167	0.038819	0.085706	0.980541	1635	1	-3.4167
WNK4	4	0.75638	0.83612	1	15795	1	0.15341	0.03888	0.085789	0.980541	1636	2	0.15341
MPC1L	4	0.47645	0.65218	1	12309	2	-1.2597	0.038944	0.085884	0.980541	1637	2	-1.2597
KLK13	4	0.95575	0.9558	1	18191	0	0.46404	0.038961	0.085899	0.980541	1638	2	0.46404
SLC19A1	4	0.28077	0.4935	1	9146	2	-1.3138	0.038976	0.085924	0.980541	1639	1	-1.3138
GRIN2A	4	0.85631	0.87954	1	16708	1	-0.92358	0.039028	0.085995	0.980541	1640	1	-0.92358
NFKBID	4	0.35196	0.56172	1	10464	2	-1.9665	0.039065	0.086053	0.980541	1641	2	-1.9665
PEX5	4	0.20693	0.3948	1	7379	2	-1.9965	0.039164	0.086185	0.980541	1642	2	-1.9965
CNTN6	4	0.97175	0.97187	1	18499	0	0.41433	0.039181	0.086207	0.980541	1643	2	0.41433
DDX47	4	0.66221	0.7936	1	14916	2	-2.3852	0.039185	0.086213	0.980541	1644	1	-2.3852
DIEXF	4	0.93099	0.93137	1	17729	1	-3.6898	0.039185	0.086213	0.980541	1645	1	-3.6898
TRPM8	4	0.071372	0.18996	0.965596	3689	2	-2.9218	0.039185	0.086213	0.980541	1646	1	-2.9218
GEMIN2	4	0.34125	0.55408	1	10332	2	-3.6089	0.039185	0.086213	0.980541	1647	1	-3.6089
THEMIS	4	0.64975	0.7839	1	14701	2	-1.163	0.039193	0.08622	0.980541	1648	2	-1.163
ADGRE1	3	0.88446	0.88455	1	17028	0	-2.539	0.03923	0.073037	0.980541	1649	1	-2.539
POU3F4	4	0.30851	0.52851	1	9805	1	0.94822	0.039251	0.086301	0.980541	1650	2	0.94822
NOG	4	0.017117	0.055317	0.887479	1167	2	-1.7055	0.039321	0.086401	0.980541	1651	2	-1.7055
FCHSD1	4	0.32386	0.54156	1	10066	2	-2.5373	0.039343	0.086442	0.980541	1652	2	-2.5373
TMEM38A	4	0.74986	0.83376	1	15735	1	1.3004	0.039356	0.086455	0.980541	1653	2	1.3004
CRIM1	4	0.052766	0.15128	0.956836	2959	1	-0.43584	0.039367	0.086471	0.980541	1654	2	-0.43584
DEF6	4	0.86174	0.88252	1	16756	1	-1.1094	0.039447	0.086583	0.980541	1655	2	-1.1094
TMEM99	4	0.89415	0.90227	1	17137	1	-0.92708	0.039484	0.086644	0.980541	1656	2	-0.92708
ARHGAP15	4	0.38101	0.58248	1	10952	2	-0.9475	0.039495	0.08666	0.980541	1657	2	-0.9475
RIC8B	4	0.39947	0.59588	1	11206	2	-2.8706	0.0395	0.086667	0.980541	1658	1	-2.8706
C7orf60	4	0.11093	0.25346	0.977779	4890	2	-2.4192	0.039542	0.086724	0.980541	1659	2	-2.4192
C2orf80	4	0.044885	0.13142	0.941565	2624	3	-5.8264	0.039605	0.086825	0.980722	1660	1	-5.8264
KCNT2	4	0.2791	0.49131	1	9118	3	-4.3164	0.039657	0.086903	0.980722	1661	1	-4.3164
S100A7	4	0.44091	0.62598	1	11784	1	-2.0649	0.039762	0.087048	0.980722	1662	1	-2.0649
RGS1	4	0.1199	0.26737	0.979598	5165	1	1.1421	0.039787	0.087087	0.980722	1663	2	1.1421
PYY	4	0.45489	0.63616	1	11990	2	-3.4378	0.039814	0.087128	0.980722	1664	1	-3.4378
COL6A6	4	0.15242	0.31648	1	6004	2	-5.4274	0.039867	0.087208	0.980722	1665	1	-5.4274
SLC35C1	4	0.022092	0.069658	0.910791	1433	1	0.64229	0.039915	0.087277	0.980722	1666	2	0.64229
KDSR	4	0.70341	0.81836	1	15410	1	-0.68038	0.039919	0.087281	0.980722	1667	2	-0.68038
STAB1	3	0.56171	0.68043	1	13509	1	-3.2359	0.03994	0.074174	0.980541	1668	1	-3.2359
FEZ2	4	0.79568	0.85128	1	16115	1	-0.80945	0.039962	0.087354	0.980722	1669	2	-0.80945
PAIP2B	4	0.99568	0.99566	1	19012	0	0.4748	0.040024	0.087437	0.980722	1670	1	0.4748
NACA2	4	0.3861	0.58616	1	11015	1	1.0798	0.040109	0.087554	0.980722	1671	2	1.0798
ZFC3H1	4	0.51344	0.67968	1	12861	2	-1.6424	0.040109	0.087554	0.980722	1672	2	-1.6424
IL27RA	4	0.64349	0.77898	1	14633	2	-2.3311	0.040128	0.087586	0.980722	1673	1	-2.3311
VN1R1	4	0.86174	0.88252	1	16757	1	0.78531	0.040173	0.087635	0.980722	1674	2	0.78531
ALG6	4	0.23162	0.42859	1	7998	2	-2.4572	0.040181	0.087648	0.980722	1675	2	-2.4572
CLSTN2	4	0.02079	0.065971	0.906243	1366	2	-2.3656	0.04022	0.087704	0.980722	1676	2	-2.3656
BPIFC	4	0.071755	0.1906	0.965596	3692	2	-3.1218	0.040233	0.087715	0.980722	1677	2	-3.1218
CDC7	4	0.81412	0.85911	1	16263	1	-2.4339	0.040286	0.087782	0.980892	1678	1	-2.4339
FER1L5	4	0.21752	0.40951	1	7643	3	-4.048	0.04039	0.087926	0.980892	1679	1	-4.048
BSPH1	4	0.14221	0.3013	0.993682	5755	2	-2.2924	0.04039	0.087926	0.980892	1680	2	-2.2924
KRTAP22-2	4	0.11542	0.2604	0.977779	5010	3	-5.8129	0.040495	0.088083	0.980892	1681	1	-5.8129
VPS13D	4	0.50251	0.67162	1	12722	2	-1.2856	0.040496	0.088085	0.980892	1682	2	-1.2856
PRADC1	4	0.82646	0.86471	1	16372	1	0.60531	0.040547	0.088163	0.980892	1683	2	0.60531
KRTAP7-1	4	0.0033711	0.011887	0.767282	289	1	0.23442	0.040573	0.088196	0.980892	1684	2	0.23442
PINK1	4	0.2046	0.39148	1	7330	3	-3.4105	0.0406	0.088231	0.980892	1685	1	-3.4105
SH2D6	4	0.1259	0.27657	0.98119	5336	2	-3.0854	0.040704	0.08837	0.980892	1686	1	-3.0854
ATAD5	4	0.303	0.5216	1	9659	3	-4.1583	0.040757	0.088438	0.980892	1687	1	-4.1583
TIMM9	4	0.67406	0.80298	1	15071	2	-0.82138	0.040809	0.088501	0.980892	1688	2	-0.82138
AP2M1	4	0.27876	0.49085	1	9111	2	-2.7509	0.040861	0.088574	0.980892	1689	2	-2.7509
KLHL11	4	0.81112	0.85782	1	16249	1	1.3518	0.040891	0.088618	0.980892	1690	2	1.3518
CIDEB	4	0.48638	0.65952	1	12458	2	-2.4825	0.040914	0.088653	0.980892	1691	1	-2.4825
TOR1B	4	0.61313	0.75549	1	14210	1	1.1758	0.04101	0.088795	0.980892	1692	2	1.1758
ZNF92	4	0.20225	0.38816	1	7263	3	-5.4092	0.041018	0.088807	0.980892	1693	1	-5.4092
YIPF7	4	0.070715	0.18886	0.965596	3668	2	-2.9248	0.041071	0.088867	0.980892	1694	2	-2.9248
ZNF100	3	0.4812	0.63629	1	12390	2	-4.5017	0.041082	0.076002	0.980541	1695	1	-4.5017
ELP4	3	0.93553	0.93571	1	17811	0	1.7996	0.041093	0.076017	0.980541	1696	2	1.7996
TFIP11	4	0.95764	0.95766	1	18218	0	0.99003	0.041104	0.088922	0.980892	1697	2	0.99003
BRIP1	4	0.98726	0.98721	1	18828	0	0.40508	0.041123	0.088944	0.980892	1698	2	0.40508
ZNF444	4	0.43653	0.62274	1	11727	1	-0.14585	0.041175	0.089007	0.980892	1699	1	-0.14585
CABP1	3	0.97912	0.97927	1	18650	0	1.6259	0.041184	0.076163	0.980541	1700	2	1.6259
SF3B6	4	0.89831	0.90513	1	17207	1	1.1312	0.041199	0.089044	0.980892	1701	2	1.1312
ACSL5	4	0.0026888	0.0095266	0.748334	239	3	-7.3356	0.041228	0.089082	0.980892	1702	1	-7.3356
CIC	4	0.08673	0.21521	0.969295	4172	1	1.1369	0.041247	0.089112	0.980892	1703	2	1.1369
PRPF18	3	0.077133	0.17628	0.965391	3870	2	-5.5458	0.041279	0.076324	0.980541	1704	1	-5.5458
PAWR	4	0.46906	0.64664	1	12182	2	-1.7221	0.041318	0.089225	0.980892	1705	2	-1.7221
VPS33B	3	0.81443	0.82219	1	16277	1	0.25101	0.041358	0.076466	0.980541	1706	1	0.25101
JUNB	4	0.2859	0.50003	1	9285	1	-0.79812	0.041359	0.089287	0.980892	1707	2	-0.79812
HELZ	4	0.89146	0.9005	1	17103	1	0.89452	0.041365	0.089295	0.980892	1708	2	0.89452
TSPAN18	4	0.289	0.50398	1	9356	2	-2.4286	0.041437	0.089394	0.980892	1709	2	-2.4286
SPANXD	3	0.76661	0.78853	1	15878	1	1.7221	0.041471	0.076646	0.980541	1710	2	1.7221
UBE2T	4	0.12323	0.27244	0.98119	5259	2	-1.6207	0.041484	0.089464	0.980892	1711	2	-1.6207
TAF5	3	0.98817	0.98833	1	18845	0	1.4065	0.041555	0.076772	0.980541	1712	2	1.4065
GLYCTK	4	0.26526	0.47343	1	8749	2	-2.0418	0.041591	0.089611	0.980892	1713	2	-2.0418
PID1	4	0.83832	0.87039	1	16504	1	0.21773	0.041603	0.089627	0.980892	1714	2	0.21773
PLA2G2D	4	0.95575	0.9558	1	18180	0	0.65617	0.04162	0.089651	0.980892	1715	2	0.65617
C8orf48	4	0.77633	0.84353	1	15934	1	0.21908	0.041639	0.08968	0.980892	1716	2	0.21908
DYNLL2	4	0.60377	0.74829	1	14091	1	1.1635	0.041663	0.089712	0.980892	1717	2	1.1635
PRSS54	4	0.21703	0.40886	1	7638	3	-3.0749	0.041699	0.089755	0.980892	1718	1	-3.0749
PHYH	3	0.50059	0.65508	1	12678	1	1.466	0.041737	0.077049	0.980541	1719	2	1.466
RPS13	1	0.95824	0.95854	1	18236	0	3.1954	0.041759	0.041676	0.980541	1720	1	3.1954
DHRS4L2	4	0.17535	0.35011	1	6579	3	-3.4364	0.041803	0.089908	0.980892	1721	1	-3.4364
RPF2	3	0.96364	0.96387	1	18337	0	-0.67943	0.041831	0.077193	0.980541	1722	2	-0.67943
NFE2	4	0.081984	0.20752	0.969295	4025	2	-2.7022	0.041842	0.089954	0.980892	1723	2	-2.7022
SLC45A2	4	0.024453	0.076331	0.914651	1561	1	-2.2369	0.041856	0.089971	0.980892	1724	1	-2.2369
ZNF341	4	0.50113	0.67062	1	12686	2	-1.6134	0.041908	0.090056	0.980892	1725	2	-1.6134
SNX7	4	0.60996	0.75303	1	14182	1	-3.1226	0.04196	0.090131	0.980892	1726	1	-3.1226
GOLPH3L	4	0.42768	0.61646	1	11593	2	-0.91899	0.041973	0.09015	0.980892	1727	2	-0.91899
FAM107A	4	0.82646	0.86471	1	16379	1	-1.2435	0.042039	0.090234	0.980892	1728	2	-1.2435
ETV3	4	0.93301	0.93322	1	17761	1	-1.6593	0.042039	0.090234	0.980892	1729	1	-1.6593
TCEB3	4	0.62013	0.76089	1	14327	2	-1.196	0.042213	0.090467	0.980892	1730	2	-1.196
PYGM	4	0.33562	0.55003	1	10230	2	-1.5405	0.042249	0.09051	0.980892	1731	2	-1.5405
ZMAT2	4	0.0019225	0.006854	0.712099	181	2	-4.2347	0.042274	0.09054	0.980892	1732	1	-4.2347
DDX53	4	0.09174	0.22333	0.971209	4334	2	-2.1554	0.042297	0.090577	0.980892	1733	2	-2.1554
CTRC	4	0.64975	0.7839	1	14731	2	-3.9097	0.042326	0.090614	0.980892	1734	1	-3.9097
PIK3C2G	4	0.37348	0.57715	1	10819	2	-0.40135	0.042339	0.09063	0.980892	1735	2	-0.40135
RPL26	4	0.65336	0.78667	1	14782	1	-1.9103	0.042378	0.090688	0.980892	1736	1	-1.9103
OR8B8	4	0.27357	0.48416	1	8960	3	-4.0356	0.042431	0.090756	0.980892	1737	1	-4.0356
TBATA	4	0.49029	0.66239	1	12523	1	-3.5264	0.042483	0.090832	0.980892	1738	1	-3.5264
ANKRD6	4	0.80809	0.8565	1	16216	1	0.86781	0.042513	0.090866	0.980892	1739	2	0.86781
OR2A7	4	0.06538	0.18007	0.965596	3502	1	0.69674	0.042531	0.090896	0.980892	1740	2	0.69674
SOX7	4	0.13089	0.28416	0.987046	5459	3	-4.8903	0.04264	0.091067	0.980892	1741	1	-4.8903
PEMT	4	0.96513	0.96518	1	18372	0	-0.67836	0.042657	0.091085	0.980892	1742	2	-0.67836
HIBCH	4	0.54411	0.70267	1	13271	2	-0.52594	0.042669	0.091112	0.980892	1743	2	-0.52594
CT45A6	3	0.81089	0.81953	1	16230	1	1.3839	0.042757	0.078668	0.980541	1744	2	1.3839
FBXL2	4	0.89557	0.90325	1	17166	1	0.5763	0.04279	0.091288	0.980892	1745	2	0.5763
ZNF750	4	0.70976	0.82033	1	15447	1	-0.48965	0.042797	0.091298	0.980892	1746	2	-0.48965
YBX3	4	0.3438	0.55589	1	10368	2	-3.4755	0.042849	0.091376	0.980892	1747	1	-3.4755
PDHA2	4	0.026016	0.080655	0.914651	1646	1	0.169	0.042862	0.091395	0.980892	1748	2	0.169
WNT9A	4	0.98788	0.98788	1	18841	0	1.2921	0.042886	0.091425	0.980892	1749	2	1.2921
ZCCHC14	4	0.43009	0.61818	1	11630	2	-3.0952	0.042953	0.091522	0.980892	1750	1	-3.0952
METTL16	4	0.024241	0.075749	0.914651	1552	1	-2.8696	0.043006	0.091595	0.980892	1751	1	-2.8696
GBE1	4	0.20701	0.39491	1	7407	2	-3.9119	0.043058	0.091662	0.980892	1752	1	-3.9119
NEURL1	3	0.94692	0.94715	1	18004	0	1.4045	0.043059	0.079158	0.980541	1753	2	1.4045
DTNBP1	4	0.76273	0.8384	1	15825	1	0.70682	0.043067	0.091671	0.980892	1754	2	0.70682
SIAE	4	0.91269	0.91571	1	17416	1	0.42396	0.043079	0.09169	0.980892	1755	2	0.42396
CLEC9A	4	0.94079	0.94085	1	17897	0	-2.1281	0.04311	0.091735	0.980892	1756	1	-2.1281
GPR6	4	0.21689	0.40867	1	7627	1	-0.42389	0.043162	0.091804	0.980892	1757	2	-0.42389
KSR2	4	0.96394	0.96399	1	18343	0	0.4672	0.043188	0.091841	0.980892	1758	2	0.4672
USP29	4	0.70976	0.82033	1	15455	1	0.46788	0.0432	0.09186	0.980892	1759	2	0.46788
SAG	4	0.46291	0.64208	1	12112	2	-2.7235	0.043215	0.09187	0.980892	1760	1	-2.7235
AMH	4	0.078402	0.20159	0.969295	3914	2	-1.6525	0.043291	0.091981	0.980892	1761	2	-1.6525
MAFK	4	0.68073	0.80823	1	15191	2	-1.4794	0.043319	0.092018	0.980892	1762	2	-1.4794
NENF	4	0.38346	0.58424	1	10970	2	-5.0246	0.043371	0.092098	0.980892	1763	1	-5.0246
A3GALT2	4	0.98174	0.98176	1	18712	0	0.68037	0.043418	0.092165	0.980892	1764	2	0.68037
NABP2	4	0.4919	0.66364	1	12546	2	-3.2432	0.043424	0.092175	0.980892	1765	1	-3.2432
PES1	3	0.87818	0.87829	1	16936	0	0.59716	0.043444	0.079787	0.980541	1766	2	0.59716
DCAF12L2	4	0.44255	0.62717	1	11801	1	-0.19802	0.043461	0.092226	0.980892	1767	2	-0.19802
CLECL1	4	0.92078	0.92237	1	17550	1	0.1636	0.043476	0.09225	0.980892	1768	2	0.1636
GPR32	4	0.39684	0.59401	1	11165	2	-1.7	0.043552	0.092351	0.980892	1769	2	-1.7
NCAPG	4	0.47645	0.65218	1	12326	2	-4.7834	0.04358	0.092396	0.980892	1770	1	-4.7834
SFXN2	3	0.6817	0.73805	1	15213	1	-1.7681	0.043601	0.080064	0.980541	1771	1	-1.7681
CD300LB	4	0.38075	0.5823	1	10942	1	-0.78675	0.043613	0.092444	0.980892	1772	2	-0.78675
ZC3H14	4	0.90236	0.908	1	17272	1	-1.5545	0.043633	0.09248	0.980892	1773	2	-1.5545
MVB12B	4	0.91731	0.91944	1	17468	1	-0.037898	0.043685	0.092554	0.980892	1774	1	-0.037898
SLC36A1	4	0.035996	0.10809	0.929217	2167	2	-2.631	0.04371	0.092582	0.980892	1775	2	-2.631
FOXN4	4	0.37562	0.57868	1	10866	1	-0.99441	0.04374	0.092627	0.980892	1776	2	-0.99441
MAGEA10	4	0.7595	0.83723	1	15809	1	-1.1461	0.043789	0.092704	0.980892	1777	1	-1.1461
EEF2KMT	3	0.96442	0.96464	1	18354	0	1.6731	0.043806	0.080376	0.980541	1778	2	1.6731
MRPL35	3	0.93553	0.93571	1	17810	0	0.81688	0.043837	0.080432	0.980541	1779	2	0.81688
BCKDHA	4	0.044885	0.13142	0.941565	2623	1	0.88262	0.043862	0.092805	0.980892	1780	2	0.88262
P2RY6	4	0.56921	0.72167	1	13614	2	-1.5459	0.04388	0.09283	0.980892	1781	2	-1.5459
POU4F2	4	0.3262	0.54326	1	10092	1	-3.9471	0.043894	0.092849	0.980892	1782	1	-3.9471
PFKFB4	4	0.85895	0.88094	1	16733	1	-0.1544	0.043946	0.092925	0.980892	1783	2	-0.1544
GAGE12J	4	0.96703	0.96707	1	18399	0	1.0462	0.043978	0.092967	0.980892	1784	2	1.0462
BOP1	4	0.9725	0.97264	1	18512	0	-1.6092	0.043998	0.092996	0.980892	1785	2	-1.6092
PEX12	3	0.49968	0.65456	1	12664	2	-4.382	0.044073	0.080804	0.980541	1786	1	-4.382
CHST9	4	0.99348	0.99352	1	18956	0	0.79288	0.044103	0.093138	0.980892	1787	2	0.79288
ARSK	4	0.16085	0.32902	1	6222	1	-0.33086	0.044155	0.093204	0.980892	1788	2	-0.33086
NSRP1	3	0.9635	0.96374	1	18336	0	0.60429	0.044191	0.080988	0.980541	1789	1	0.60429
ST6GAL2	3	0.91281	0.91292	1	17421	0	-0.86116	0.04423	0.081048	0.980541	1790	1	-0.86116
RAB27A	4	0.97512	0.9753	1	18588	0	0.60775	0.044234	0.093319	0.980892	1791	2	0.60775
SERPINB11	4	0.98275	0.98278	1	18730	0	1.1121	0.044271	0.093363	0.980892	1792	2	1.1121
ASPM	4	0.43981	0.62521	1	11768	2	-1.917	0.044285	0.093385	0.980892	1793	2	-1.917
CELF6	4	0.85895	0.88094	1	16736	1	-0.21668	0.044314	0.093425	0.980892	1794	2	-0.21668
CGNL1	4	0.96444	0.96449	1	18356	0	0.81472	0.044357	0.09348	0.980892	1795	2	0.81472
ANKRD63	4	0.23469	0.43279	1	8097	3	-4.2073	0.044364	0.093493	0.980892	1796	1	-4.2073
CELA1	4	0.69686	0.81636	1	15362	1	-0.023216	0.044375	0.093509	0.980892	1797	2	-0.023216
FNTA	3	0.28188	0.4341	1	9152	1	-4.0034	0.044387	0.081286	0.980541	1798	1	-4.0034
MEF2BNB	4	0.89146	0.9005	1	17116	1	0.40688	0.044416	0.09356	0.980892	1799	2	0.40688
C4orf3	4	0.20133	0.38689	1	7255	2	-5.1755	0.044468	0.093625	0.980892	1800	1	-5.1755
OR5AS1	4	0.92328	0.92453	1	17586	1	1.1182	0.04451	0.093684	0.980892	1801	2	1.1182
PDE4A	4	0.64381	0.77925	1	14660	1	1.0828	0.04452	0.093696	0.980892	1802	2	1.0828
EVPLL	4	0.19745	0.38137	1	7137	2	-1.9889	0.044651	0.093863	0.980892	1803	2	-1.9889
PTCRA	4	0.33684	0.55092	1	10271	2	-1.5198	0.044675	0.093894	0.980892	1804	2	-1.5198
NCOA1	4	0.60064	0.74586	1	14037	2	-1.6953	0.044677	0.093896	0.980892	1805	2	-1.6953
FAM178B	4	0.46906	0.64664	1	12196	1	0.4148	0.044712	0.093957	0.980892	1806	2	0.4148
ZNF630	4	0.66221	0.7936	1	14892	2	-0.81548	0.044749	0.094004	0.980892	1807	2	-0.81548
ZNF334	4	0.5257	0.68896	1	13026	2	-1.7456	0.044781	0.094051	0.980892	1808	1	-1.7456
LTB	4	0.34779	0.55871	1	10425	2	-1.6498	0.044817	0.094096	0.980892	1809	2	-1.6498
FITM1	3	0.36629	0.52109	1	10715	2	-5.141	0.044819	0.081957	0.980541	1810	1	-5.141
PELI1	4	0.86464	0.88417	1	16788	1	-2.6328	0.044859	0.094157	0.980892	1811	1	-2.6328
KCNG4	4	0.024006	0.07508	0.910875	1549	2	-2.5985	0.044921	0.094238	0.980892	1812	2	-2.5985
ANKRD44	4	0.2602	0.4668	1	8651	3	-4.8738	0.04499	0.09433	0.980892	1813	1	-4.8738
AP2B1	4	0.83381	0.86822	1	16458	1	-1.7685	0.045042	0.094399	0.980892	1814	1	-1.7685
CDHR3	4	0.63079	0.76918	1	14449	1	-1.3204	0.045094	0.094468	0.980892	1815	1	-1.3204
NMNAT2	4	0.60682	0.75062	1	14135	2	-0.93446	0.045143	0.094532	0.980892	1816	2	-0.93446
GGT1	4	0.5312	0.69299	1	13109	2	-1.7475	0.045146	0.094537	0.980892	1817	2	-1.7475
ODC1	4	0.65007	0.78417	1	14746	1	0.91928	0.045168	0.094568	0.980892	1818	2	0.91928
DAZAP1	4	0.57526	0.72628	1	13720	2	-3.1754	0.045198	0.094612	0.980892	1819	1	-3.1754
GSR	3	0.91281	0.91292	1	17419	0	1.7115	0.04522	0.082605	0.980541	1820	2	1.7115
CLEC17A	4	0.39146	0.59006	1	11092	1	-0.60018	0.045229	0.094644	0.980892	1821	2	-0.60018
NDUFAF4	4	0.42527	0.61467	1	11556	2	-1.7152	0.045242	0.094662	0.980892	1822	2	-1.7152
TAF2	4	0.76597	0.83959	1	15857	1	-0.51212	0.045329	0.094789	0.980892	1823	1	-0.51212
SLC1A7	4	0.89694	0.90419	1	17179	1	-1.3209	0.045329	0.094789	0.980892	1824	1	-1.3209
MED1	4	0.99187	0.9919	1	18921	0	1.1774	0.045396	0.094886	0.980892	1825	2	1.1774
TFAP2E	4	0.11093	0.25346	0.977779	4886	2	-2.5561	0.045452	0.094986	0.980892	1826	2	-2.5561
DHODH	4	0.47645	0.65218	1	12337	2	-3.728	0.045459	0.095001	0.980892	1827	1	-3.728
LRRC8A	4	0.19263	0.37467	1	7026	2	-1.8391	0.045464	0.095009	0.980892	1828	2	-1.8391
EXD3	4	0.65624	0.78895	1	14825	2	-1.6851	0.045511	0.095074	0.980892	1829	2	-1.6851
TMEM215	4	0.66846	0.79853	1	14994	2	-1.2022	0.045513	0.095075	0.980892	1830	2	-1.2022
EGFR	4	0.67406	0.80298	1	15065	1	0.11525	0.045513	0.095075	0.980892	1831	2	0.11525
ADI1	4	0.85631	0.87954	1	16699	1	-1.8405	0.045564	0.095135	0.980892	1832	1	-1.8405
TMEM45A	3	0.98975	0.98988	1	18879	0	1.4167	0.045592	0.083173	0.980541	1833	2	1.4167
AQP8	4	0.5257	0.68896	1	13040	1	0.37803	0.045668	0.095286	0.980892	1834	2	0.37803
TAF9B	4	0.93627	0.93633	1	17815	1	0.36618	0.045786	0.095445	0.980892	1835	2	0.36618
GOLGA6B	4	0.36546	0.57138	1	10686	2	-4.6524	0.045824	0.0955	0.980892	1836	1	-4.6524
NTRK1	4	0.094124	0.22714	0.974676	4402	2	-2.0394	0.045873	0.095581	0.980892	1837	2	-2.0394
RPRD1A	4	0.9799	0.97999	1	18672	0	0.66797	0.045876	0.095585	0.980892	1838	2	0.66797
TCERG1	4	0.93522	0.93535	1	17788	1	-3.8195	0.045929	0.095652	0.980892	1839	1	-3.8195
FGF23	3	0.96639	0.96661	1	18388	0	1.5668	0.045993	0.083805	0.980541	1840	2	1.5668
MUC20	4	0.66846	0.79853	1	14992	2	-2.3142	0.046007	0.095775	0.980892	1841	1	-2.3142
SNRNP48	4	0.72137	0.82412	1	15531	1	-1.6986	0.046085	0.095891	0.980892	1842	1	-1.6986
UBXN4	4	0.52483	0.68831	1	12993	2	-2.8646	0.046137	0.095955	0.980892	1843	1	-2.8646
GPM6A	4	0.78601	0.84739	1	16038	1	0.99026	0.04614	0.095962	0.980892	1844	2	0.99026
MROH8	4	0.25979	0.46629	1	8642	1	-0.9045	0.046215	0.096059	0.980892	1845	1	-0.9045
PCCA	4	0.064456	0.1785	0.965391	3482	2	-3.0801	0.046215	0.096059	0.980892	1846	1	-3.0801
ESR1	4	0.2859	0.50003	1	9286	1	-1.0747	0.046284	0.096151	0.980892	1847	2	-1.0747
POC1B-GALNT4	4	0.49029	0.66239	1	12520	2	-2.0783	0.046293	0.096167	0.980892	1848	1	-2.0783
DISP1	4	0.10657	0.2466	0.977779	4750	2	-1.9019	0.046352	0.096251	0.980892	1849	2	-1.9019
2004-09-01	4	0.58513	0.73392	1	13843	2	-0.3803	0.046496	0.096435	0.980892	1850	2	-0.3803
FAM103A1	4	0.46003	0.64001	1	12067	2	-3.0745	0.046502	0.096442	0.980892	1851	2	-3.0745
AQP12B	4	0.55801	0.7132	1	13469	2	-4.6583	0.046554	0.096508	0.980892	1852	1	-4.6583
TMEM231	4	0.51718	0.68252	1	12887	1	-0.74912	0.046571	0.09653	0.980892	1853	2	-0.74912
RNF125	4	0.13557	0.29126	0.990545	5569	2	-1.6289	0.046606	0.096583	0.980892	1854	2	-1.6289
CIAPIN1	4	0.60996	0.75303	1	14184	1	0.64679	0.046639	0.096628	0.980892	1855	2	0.64679
HRC	4	0.033144	0.10043	0.924302	2023	2	-2.0552	0.046684	0.096682	0.980892	1856	2	-2.0552
NGDN	3	0.88755	0.88766	1	17067	0	-1.0042	0.046782	0.085047	0.980541	1857	1	-1.0042
PRDX2	4	0.98455	0.98454	1	18772	0	1.2881	0.046783	0.09683	0.980892	1858	2	1.2881
KPNA3	4	0.9824	0.98243	1	18726	0	0.80971	0.046833	0.096895	0.980892	1859	2	0.80971
MCEE	4	0.30737	0.52711	1	9788	2	-4.7131	0.046919	0.097012	0.980892	1860	1	-4.7131
MRPL24	4	0.16816	0.33969	1	6424	2	-0.9036	0.046971	0.097084	0.980892	1861	2	-0.9036
DISC1	4	0.58482	0.73369	1	13836	2	-1.5576	0.047023	0.097164	0.980892	1862	1	-1.5576
PEX16	4	0.29394	0.5102	1	9445	3	-5.2321	0.047075	0.097232	0.980892	1863	1	-5.2321
FAM86C1	4	0.7595	0.83723	1	15821	1	1.418	0.047097	0.097267	0.980892	1864	2	1.418
SLC4A10	4	0.57518	0.72622	1	13705	1	0.27255	0.047127	0.097306	0.980892	1865	1	0.27255
SPATA9	4	0.098054	0.23331	0.975808	4522	2	-2.0553	0.04716	0.097349	0.980892	1866	2	-2.0553
NOMO3	4	0.22714	0.42249	1	7881	2	-4.4232	0.047231	0.097445	0.980892	1867	1	-4.4232
NUP50	3	0.90519	0.90529	1	17316	0	0.36769	0.047253	0.085778	0.980541	1868	1	0.36769
SIRT7	4	0.60344	0.74803	1	14081	2	-1.0253	0.047283	0.097525	0.980892	1869	2	-1.0253
NCAPD3	4	0.080863	0.20566	0.969295	3978	1	-0.26329	0.047335	0.097594	0.980892	1870	2	-0.26329
SUSD3	4	0.96134	0.96132	1	18306	0	1.0305	0.047336	0.097594	0.980892	1871	2	1.0305
HORMAD1	4	0.0028043	0.009938	0.748334	244	3	-6.6111	0.047387	0.097665	0.980892	1872	1	-6.6111
UNCX	4	0.79568	0.85128	1	16125	1	-0.24292	0.04744	0.097738	0.980892	1873	2	-0.24292
SHISA7	4	0.19104	0.37246	1	6985	2	-2.2446	0.047443	0.097744	0.980892	1874	2	-2.2446
UGT8	4	0.97982	0.97993	1	18669	0	0.72874	0.047544	0.097886	0.980892	1875	2	0.72874
TMOD1	4	0.4919	0.66364	1	12560	2	-1.7059	0.047569	0.097928	0.980892	1876	2	-1.7059
OR10J3	4	0.40229	0.598	1	11256	1	0.44746	0.0476	0.097979	0.980892	1877	2	0.44746
ATR	4	0.6806	0.80813	1	15168	1	1.2935	0.047714	0.098144	0.980892	1878	2	1.2935
PCK1	4	0.39735	0.59437	1	11190	2	-3.0138	0.047726	0.098162	0.980892	1879	1	-3.0138
WBSCR27	4	0.92664	0.92744	1	17641	1	0.69206	0.047739	0.098179	0.980892	1880	2	0.69206
BNC2	4	0.012869	0.042335	0.879517	902	2	-2.7844	0.047804	0.098263	0.980892	1881	2	-2.7844
SLC5A1	3	0.45901	0.61425	1	12045	1	1.8251	0.047813	0.086674	0.980541	1882	2	1.8251
PEX10	4	0.58521	0.73398	1	13844	2	-0.62486	0.047815	0.098279	0.980892	1883	2	-0.62486
MOCS1	4	0.92529	0.92624	1	17618	1	-0.11143	0.047827	0.098294	0.980892	1884	2	-0.11143
KMT2D	4	0.64054	0.77667	1	14609	1	0.16913	0.047891	0.098375	0.980892	1885	2	0.16913
CEACAM1	4	0.083623	0.21017	0.969295	4082	2	-4.4261	0.047908	0.098402	0.980892	1886	1	-4.4261
CTDSP2	4	0.58258	0.73196	1	13826	1	0.94284	0.047916	0.098412	0.980892	1887	2	0.94284
PTPRM	4	0.23306	0.43054	1	8037	2	-1.7389	0.047941	0.098442	0.980892	1888	2	-1.7389
ZNF430	4	0.060785	0.17096	0.96493	3313	2	-3.1969	0.04796	0.098468	0.980892	1889	1	-3.1969
OR4D5	4	0.97488	0.97504	1	18579	0	1.0207	0.047966	0.098477	0.980892	1890	2	1.0207
ATP6V1F	3	0.93246	0.93261	1	17744	0	0.96985	0.047998	0.086968	0.980722	1891	2	0.96985
XBP1	4	0.20414	0.39083	1	7318	2	-2.1091	0.048004	0.098529	0.980892	1892	2	-2.1091
ELMOD1	4	0.46291	0.64208	1	12102	1	0.093878	0.048064	0.098618	0.980892	1893	1	0.093878
ANP32D	4	0.048754	0.14116	0.94944	2794	3	-6.4924	0.048116	0.098683	0.980892	1894	1	-6.4924
COX6A2	3	0.45979	0.61501	1	12047	2	-2.8083	0.048155	0.08723	0.980722	1895	1	-2.8083
FNIP1	4	0.018311	0.058774	0.88844	1246	3	-6.9155	0.04822	0.098841	0.980892	1896	1	-6.9155
PHEX	4	0.37562	0.57868	1	10860	2	-1.5444	0.048347	0.099016	0.980892	1897	2	-1.5444
C17orf75	4	0.018496	0.059351	0.88844	1253	2	-5.3909	0.048376	0.099064	0.980892	1898	1	-5.3909
CDC25A	4	0.67406	0.80298	1	15078	1	1.0092	0.048391	0.09908	0.980892	1899	2	1.0092
LOC200726	4	0.23469	0.43279	1	8072	3	-5.2359	0.048429	0.099123	0.980892	1900	1	-5.2359
GPC5	4	0.10628	0.24615	0.977779	4742	3	-6.1242	0.048481	0.099197	0.980892	1901	1	-6.1242
DERA	4	0.56921	0.72167	1	13607	2	-3.9115	0.048533	0.099265	0.980892	1902	1	-3.9115
ABCC1	4	0.31993	0.53882	1	10011	2	-1.4714	0.048563	0.099308	0.980892	1903	2	-1.4714
C18orf8	4	0.052377	0.15032	0.956836	2951	1	0.48488	0.048585	0.09933	0.980892	1904	2	0.48488
KIAA0141	4	0.20566	0.39299	1	7338	1	-1.1984	0.048601	0.099353	0.980892	1905	2	-1.1984
OPRM1	4	0.7381	0.82962	1	15645	1	-0.52984	0.048637	0.099404	0.980892	1906	1	-0.52984
MRPS22	4	0.96703	0.96707	1	18394	0	0.7756	0.048665	0.099444	0.980892	1907	2	0.7756
DDX20	4	0.27576	0.48694	1	9017	2	-4.3209	0.048689	0.09948	0.980892	1908	1	-4.3209
PRAMEF17	4	0.24649	0.44853	1	8378	1	-0.53801	0.04869	0.099482	0.980892	1909	2	-0.53801
FMO1	4	0.13682	0.29315	0.990545	5621	2	-1.7551	0.048703	0.099496	0.980892	1910	2	-1.7551
TIGD5	4	0.86464	0.88417	1	16794	1	-0.10455	0.048741	0.099553	0.980892	1911	2	-0.10455
HS3ST2	4	0.74312	0.83138	1	15691	1	0.69272	0.048779	0.099611	0.980892	1912	2	0.69272
CSF2RB	4	0.31555	0.53574	1	9964	1	0.68418	0.048792	0.09963	0.980892	1913	2	0.68418
MCM9	4	0.15429	0.31928	1	6041	1	-1.052	0.048793	0.099631	0.980892	1914	2	-1.052
SART3	4	0.31544	0.53566	1	9940	2	-2.3253	0.048845	0.099698	0.980892	1915	2	-2.3253
GALNT18	4	0.54703	0.70487	1	13296	2	-4.5864	0.048897	0.099755	0.980892	1916	1	-4.5864
GABRG2	4	0.98776	0.98775	1	18837	0	0.50602	0.04892	0.099787	0.980892	1917	2	0.50602
CCDC27	4	0.7595	0.83723	1	15814	1	-3.6288	0.048949	0.099835	0.980892	1918	1	-3.6288
SCAMP1	4	0.46291	0.64208	1	12115	1	0.074121	0.048996	0.099895	0.980892	1919	2	0.074121
MCMDC2	4	0.59424	0.7409	1	13983	2	-1.603	0.049047	0.099968	0.980892	1920	2	-1.603
PPP2R2A	4	0.94572	0.94575	1	17976	0	-1.1108	0.049086	0.10003	0.980892	1921	2	-1.1108
ARF6	4	0.30579	0.52509	1	9709	3	-4.8522	0.049131	0.1001	0.980892	1922	1	-4.8522
BCAR1	4	0.4544	0.6358	1	11966	2	-4.449	0.049131	0.1001	0.980892	1923	1	-4.449
ZBTB20	3	0.24369	0.39418	1	8288	2	-4.5395	0.049252	0.088943	0.980892	1924	1	-4.5395
ADAM8	4	0.98501	0.98499	1	18780	0	1.2502	0.049284	0.10032	0.980892	1925	2	1.2502
ANTXRL	4	0.52483	0.68831	1	12985	2	-4.3885	0.049313	0.10037	0.980892	1926	1	-4.3885
MACROD1	4	0.98222	0.98223	1	18721	0	0.99089	0.049316	0.10037	0.980892	1927	2	0.99089
AKAP10	4	0.12274	0.27171	0.981099	5229	1	0.13755	0.049329	0.10039	0.980892	1928	2	0.13755
RPL21	4	0.70976	0.82033	1	15443	1	0.29225	0.049365	0.10044	0.980892	1929	2	0.29225
SLC2A9	4	0.23785	0.43704	1	8150	2	-2.0569	0.049495	0.10064	0.980892	1930	2	-2.0569
PHF8	4	0.38775	0.58737	1	11042	2	-2.8245	0.049521	0.10068	0.980892	1931	1	-2.8245
INSRR	4	0.97415	0.9743	1	18558	0	0.62955	0.049559	0.10073	0.980892	1932	2	0.62955
AQP1	4	0.97069	0.97076	1	18475	0	-0.19844	0.049599	0.10079	0.980892	1933	1	-0.19844
ENTPD4	4	0.083623	0.21017	0.969295	4081	2	-4.6243	0.049599	0.10079	0.980892	1934	1	-4.6243
CNPY3	4	0.3438	0.55589	1	10371	2	-1.2237	0.0497	0.10093	0.980892	1935	2	-1.2237
CARD10	4	0.77938	0.84471	1	15955	1	0.35202	0.049781	0.10104	0.980892	1936	1	0.35202
GLP1R	4	0.95174	0.95179	1	18106	0	-0.063986	0.049833	0.10112	0.980892	1937	2	-0.063986
ATL2	4	0.9537	0.95373	1	18135	0	0.70137	0.049913	0.10124	0.980892	1938	2	0.70137
CXCL6	3	0.96241	0.96265	1	18315	0	1.5237	0.049915	0.08998	0.980892	1939	2	1.5237
EPS8	4	0.20414	0.39083	1	7299	2	-3.1026	0.049937	0.10127	0.980892	1940	1	-3.1026
AGTR2	4	0.97172	0.97184	1	18497	0	0.434	0.049958	0.1013	0.980892	1941	2	0.434
CRLF2	4	0.71622	0.82242	1	15497	1	-0.91137	0.050022	0.10138	0.980892	1942	2	-0.91137
PKDREJ	4	0.52845	0.69098	1	13063	1	0.14787	0.050074	0.10146	0.980892	1943	2	0.14787
PARVA	4	0.17173	0.34492	1	6497	2	-2.8057	0.050092	0.10148	0.980892	1944	1	-2.8057
PRB3	4	0.34364	0.55576	1	10347	2	-1.881	0.050164	0.10157	0.980892	1945	2	-1.881
GLT1D1	4	0.24117	0.44143	1	8229	1	0.68824	0.05019	0.1016	0.980892	1946	2	0.68824
F2RL2	4	0.58803	0.73612	1	13892	2	-1.4232	0.050228	0.10167	0.980892	1947	2	-1.4232
MPND	4	0.40467	0.59966	1	11280	1	0.29499	0.050241	0.10168	0.980892	1948	2	0.29499
RXFP1	4	0.62508	0.76476	1	14405	2	-2.3079	0.050248	0.10169	0.980892	1949	1	-2.3079
SREBF1	4	0.06733	0.18329	0.965596	3572	3	-6.2734	0.0503	0.10177	0.980892	1950	1	-6.2734
ACAN	4	0.84476	0.87351	1	16577	1	0.38336	0.050325	0.1018	0.980892	1951	2	0.38336
LRRC74A	4	0.61945	0.76039	1	14311	2	-1.4146	0.050435	0.10196	0.980892	1952	2	-1.4146
SHANK1	4	0.41593	0.60784	1	11430	2	-3.0242	0.050456	0.10199	0.980892	1953	1	-3.0242
GAS8	4	0.18297	0.36098	1	6768	1	0.84611	0.050474	0.10202	0.980892	1954	2	0.84611
RNF214	4	0.1729	0.34657	1	6524	1	1.0521	0.050513	0.10207	0.980892	1955	2	1.0521
PRSS22	4	0.26829	0.47728	1	8828	1	0.72748	0.050538	0.10211	0.980892	1956	2	0.72748
ADAMTS4	4	0.92664	0.92744	1	17633	1	-0.26102	0.05056	0.10214	0.980892	1957	2	-0.26102
HOXC10	3	0.88446	0.88455	1	17027	0	0.0013903	0.050661	0.091153	0.980892	1958	1	0.0013903
DTX1	4	0.31218	0.53314	1	9871	3	-4.6557	0.050664	0.10229	0.980892	1959	1	-4.6557
TMX2	4	0.60064	0.74586	1	14042	2	-1.2652	0.050668	0.1023	0.980892	1960	2	-1.2652
UBE3D	4	0.42855	0.6171	1	11602	1	-3.4887	0.050716	0.10237	0.980892	1961	1	-3.4887
GBX1	4	0.93099	0.93137	1	17704	1	0.98508	0.05072	0.10237	0.980892	1962	2	0.98508
TREML4	4	0.91731	0.91944	1	17486	1	0.97234	0.050765	0.10244	0.980892	1963	2	0.97234
LOXL1	4	0.67071	0.80029	1	15034	1	-0.76821	0.050768	0.10245	0.980892	1964	1	-0.76821
PCDH18	4	0.7595	0.83723	1	15820	1	0.10786	0.05081	0.10251	0.980892	1965	2	0.10786
SLC25A45	4	0.43653	0.62274	1	11724	1	-0.71764	0.05082	0.10252	0.980892	1966	1	-0.71764
GOLGA1	4	0.56366	0.71749	1	13541	2	-2.3513	0.050924	0.10267	0.980892	1967	1	-2.3513
ANXA6	4	0.10806	0.24893	0.977779	4799	2	-1.9261	0.050973	0.10272	0.980892	1968	2	-1.9261
GPBAR1	4	0.97069	0.97076	1	18484	0	-0.683	0.050975	0.10273	0.980892	1969	1	-0.683
CAMK2N2	4	0.57184	0.72366	1	13642	2	-0.88696	0.051079	0.10289	0.980892	1970	2	-0.88696
ACTL7A	4	0.57526	0.72628	1	13731	2	-2.4893	0.051131	0.10295	0.980892	1971	1	-2.4893
LRIT2	4	0.093298	0.22583	0.971209	4382	3	-5.6706	0.051183	0.10303	0.980892	1972	1	-5.6706
ZNF665	4	0.6806	0.80813	1	15161	1	0.14384	0.0512	0.10306	0.980892	1973	2	0.14384
PTDSS1	4	0.98742	0.98739	1	18833	0	0.60032	0.051226	0.10309	0.980892	1974	2	0.60032
SFT2D2	4	0.052212	0.14989	0.956628	2944	3	-6.3769	0.051235	0.1031	0.980892	1975	1	-6.3769
TRIP11	4	0.92308	0.92434	1	17583	1	0.81072	0.051304	0.10319	0.980892	1976	2	0.81072
STEAP2	4	0.27576	0.48694	1	9011	1	0.58083	0.051337	0.10324	0.980892	1977	2	0.58083
CCR5	4	0.070529	0.18855	0.965596	3661	3	-6.1728	0.051339	0.10325	0.980892	1978	1	-6.1728
COL17A1	3	0.35989	0.51458	1	10589	1	1.2879	0.051359	0.092283	0.980892	1979	2	1.2879
EPS8L2	4	0.37423	0.57769	1	10842	2	-3.1124	0.051391	0.10333	0.980892	1980	1	-3.1124
B3GAT2	2	0.36558	0.45328	1	10695	1	-1.6537	0.051449	0.083584	0.980541	1981	1	-1.6537
ARHGAP28	4	0.2657	0.47401	1	8800	1	0.26985	0.051539	0.10353	0.980892	1982	2	0.26985
RP1L1	4	0.73648	0.82905	1	15637	1	-1.8792	0.051598	0.1036	0.980892	1983	1	-1.8792
ITGA1	4	0.51344	0.67968	1	12849	2	-2.979	0.051598	0.1036	0.980892	1984	1	-2.979
FAH	4	0.62013	0.76089	1	14329	1	-1.436	0.051598	0.1036	0.980892	1985	2	-1.436
GINS4	4	0.32181	0.54012	1	10038	2	-4.5985	0.051598	0.1036	0.980892	1986	1	-4.5985
ZNF304	4	0.064325	0.17827	0.965391	3471	3	-6.2869	0.051598	0.1036	0.980892	1987	1	-6.2869
LOC100130357	3	0.7945	0.80761	1	16110	1	1.488	0.051642	0.092718	0.980892	1988	2	1.488
ZBTB12	4	0.45489	0.63616	1	11992	2	-1.8739	0.051663	0.1037	0.980892	1989	2	-1.8739
OXLD1	3	0.98915	0.98927	1	18869	0	0.94253	0.051678	0.092764	0.980892	1990	2	0.94253
SH2D3C	4	0.1015	0.23868	0.977089	4610	2	-1.4639	0.051702	0.10376	0.980892	1991	2	-1.4639
RBP7	3	0.89077	0.89084	1	17099	0	-2.1707	0.051717	0.092828	0.980892	1992	1	-2.1707
HS3ST1	4	0.88895	0.89883	1	17081	1	1.1014	0.051734	0.10381	0.980892	1993	2	1.1014
MAGEB6	4	0.1785	0.3546	1	6653	2	-2.2965	0.051747	0.10382	0.980892	1994	2	-2.2965
PSMD2	4	0.53107	0.6929	1	13085	2	-4.7646	0.051754	0.10383	0.980892	1995	1	-4.7646
TWSG1	4	0.82944	0.86613	1	16411	1	0.039892	0.051819	0.10393	0.980892	1996	2	0.039892
LTBP2	4	0.83232	0.86752	1	16437	1	-2.3814	0.051858	0.10398	0.980892	1997	1	-2.3814
CC2D2B	4	0.7262	0.8257	1	15562	1	0.33145	0.051872	0.104	0.980892	1998	2	0.33145
TNNC2	4	0.95575	0.9558	1	18190	0	0.46522	0.05191	0.10405	0.980892	1999	2	0.46522
TEX9	4	0.99706	0.99707	1	19039	0	1.1277	0.05197	0.10413	0.980892	2000	2	1.1277
[truncated: 17,108 more rows]

## Sheet: HCoV-OC43
id	num	neg|score	neg|p-value	neg|fdr	neg|rank	neg|goodsgrna	neg|lfc	pos|score	pos|p-value	pos|fdr	pos|rank	pos|goodsgrna	pos|lfc
CCDC101	4	0.99921	0.99921	0.999998	19073	0	5.1307	1.5173e-06	4.9225e-06	0.034653	2	3	5.1307
EXT1	4	1	1	0.999998	19108	0	4.4803	1.6107e-06	5.4407e-06	0.034653	3	4	4.4803
EXT2	4	1	1	0.999998	19107	0	3.0771	2.3695e-06	7.5133e-06	0.035891	4	4	3.0771
ADIPOQ	4	0.99819	0.99818	0.999998	19042	0	5.0966	3.7141e-06	1.2695e-05	0.048515	5	3	5.0966
SLC35B2	4	0.99999	0.99999	0.999998	19106	0	3.6216	5.0935e-06	1.9431e-05	0.054455	6	4	3.6216
CYLC2	4	0.99999	0.99999	0.999998	19105	0	2.4548	5.2046e-06	1.9949e-05	0.054455	7	4	2.4548
KAT2A	4	0.99999	0.99998	0.999998	19104	0	2.5684	1.2668e-05	5.1557e-05	0.123144	8	4	2.5684
TADA3	4	0.99998	0.99998	0.999998	19103	0	1.8286	2.256e-05	9.1455e-05	0.182756	9	4	1.8286
VPS41	4	0.99391	0.99394	0.999998	18925	0	4.1269	2.6412e-05	0.00010493	0.182756	10	3	4.1269
RAPGEF4	4	0.81105	0.85778	0.999998	16172	1	-1.0895	2.7034e-05	0.000107	0.182756	11	2	-1.0895
MECP2	4	0.98437	0.98436	0.999998	18726	0	3.7945	3.5899e-05	0.00013757	0.202209	12	3	3.7945
ASF1A	3	0.95075	0.95102	0.999998	18058	0	5.4807	3.6827e-05	0.00011477	0.182756	13	2	5.4807
RASD1	4	0.88212	0.89446	0.999998	16932	1	3.414	4.297e-05	0.00016659	0.227369	14	3	3.414
XKR3	4	0.99995	0.99995	0.999998	19102	0	2.279	4.9047e-05	0.00019146	0.229889	15	4	2.279
USP45	4	0.8909	0.90013	0.999998	17054	1	3.4326	4.9352e-05	0.0001925	0.229889	16	3	3.4326
EVPLL	4	0.99994	0.99994	0.999998	19101	0	1.9258	5.6557e-05	0.00022203	0.249563	17	4	1.9258
OR1G1	4	0.97893	0.97907	0.999998	18613	0	3.0156	6.2225e-05	0.00025105	0.252475	18	3	3.0156
CDC40	4	0.99993	0.99993	0.999998	19100	0	2.2714	6.7659e-05	0.00027333	0.261139	19	4	2.2714
COL7A1	4	0.43174	0.61932	0.997342	11710	2	-2.3871	8.1102e-05	0.00032722	0.297737	20	2	-2.3871
SUPT20H	4	0.12572	0.27628	0.985922	5316	1	2.8068	9.2667e-05	0.0003666	0.309298	21	3	2.8068
KLF16	3	0.8993	0.89945	0.999998	17171	0	5.0654	0.00012083	0.0003723	0.309298	22	2	5.0654
ZNF626	2	0.85919	0.859	0.999998	16641	0	2.5448	0.00012165	0.00023861	0.252475	23	1	2.5448
TTC33	4	0.99987	0.99988	0.999998	19099	0	2.7639	0.000131	0.00051894	0.401181	24	4	2.7639
NR2F6	4	0.55659	0.71211	0.999998	13413	1	-1.2045	0.00013517	0.00053811	0.401181	25	1	-1.2045
UBE2Q1	4	0.99986	0.99987	0.999998	19098	0	2.1661	0.00013737	0.00054588	0.401181	26	4	2.1661
TNIP2	4	0.62982	0.76844	0.999998	14408	2	-0.17408	0.00015272	0.00060184	0.416354	27	2	-0.17408
HIST2H3C	4	0.99009	0.99007	0.999998	18841	0	2.807	0.00015929	0.00062412	0.416354	28	3	2.807
UGDH	4	0.99841	0.99839	0.999998	19051	0	2.937	0.00016179	0.0006319	0.416354	29	3	2.937
CST4	4	0.12258	0.27147	0.984237	5213	1	-0.51876	0.00018923	0.00071636	0.447621	30	1	-0.51876
LCE1D	4	0.9983	0.99829	0.999998	19048	0	2.927	0.00019217	0.0007262	0.447621	31	3	2.927
PLSCR4	4	0.86568	0.88478	0.999998	16722	1	1.2127	0.00021009	0.00079408	0.474165	32	2	1.2127
STARD9	4	0.99977	0.99977	0.999998	19097	0	2.3877	0.00023397	0.0008775	0.480336	33	4	2.3877
XAGE2	4	0.99976	0.99977	0.999998	19096	0	2.307	0.00023954	0.0008946	0.480336	34	4	2.307
ASPHD2	4	0.17035	0.3429	0.992673	6466	1	2.2017	0.00024166	0.00090341	0.480336	35	2	2.2017
UBQLN1	4	0.93545	0.93557	0.999998	17779	1	2.9034	0.00024223	0.00090497	0.480336	36	3	2.9034
TUBA3C	4	0.57038	0.72259	0.999998	13575	1	2.9665	0.00027433	0.0010195	0.489178	37	3	2.9665
HLF	4	0.99971	0.99972	0.999998	19095	0	1.1523	0.00028605	0.0010557	0.489178	38	4	1.1523
CAPS	4	0.28231	0.49545	0.993114	9318	2	-4.7199	0.00029735	0.0011003	0.489178	39	1	-4.7199
ERI1	4	0.9997	0.9997	0.999998	19094	0	3.5905	0.00029762	0.0011008	0.489178	40	4	3.5905
TADA1	4	0.99783	0.99783	0.999998	19032	0	2.401	0.00030645	0.0011324	0.491787	41	3	2.401
SCNN1B	3	0.99967	0.99966	0.999998	19093	0	3.1056	0.00033218	0.00098269	0.489178	42	3	3.1056
NINJ1	4	0.9916	0.99164	0.999998	18863	0	1.9493	0.00033492	0.001233	0.500891	43	2	1.9493
CPLX3	4	0.99966	0.99966	0.999998	19092	0	1.2339	0.00034433	0.0012661	0.500891	44	4	1.2339
ZAR1L	4	0.99585	0.99584	0.999998	18987	0	2.5936	0.00034486	0.0012672	0.500891	45	3	2.5936
SPATA20	4	0.30771	0.52752	0.994807	9948	2	-4.995	0.0003514	0.0012868	0.500891	46	1	-4.995
COL17A1	3	0.99965	0.99964	0.999998	19091	0	2.9062	0.00035343	0.001049	0.489178	47	3	2.9062
TOX	4	0.99964	0.99964	0.999998	19090	0	1.2334	0.00035792	0.0013107	0.500891	48	4	1.2334
SIRT2	3	0.45662	0.61185	0.997342	12076	1	-3.1338	0.00036492	0.001078	0.489178	49	1	-3.1338
AHR	4	0.99961	0.99961	0.999998	19089	0	2.1224	0.0003914	0.0014366	0.538245	50	4	2.1224
C17orf74	4	0.98815	0.98814	0.999998	18802	0	0.38165	0.00040546	0.0014848	0.545602	51	2	0.38165
PON1	3	0.99958	0.99957	0.999998	19088	0	1.9997	0.00042498	0.0012521	0.500891	52	3	1.9997
ZNF512	4	0.62877	0.76763	0.999998	14389	1	2.7093	0.00042556	0.0015542	0.56034	53	3	2.7093
EXTL3	4	0.99954	0.99954	0.999998	19087	0	2.1593	0.00046158	0.0016967	0.588341	54	4	2.1593
SLC5A8	4	0.50575	0.67399	0.999998	12748	2	-0.73732	0.00048405	0.0017801	0.588341	55	2	-0.73732
FCRL3	4	0.99952	0.99951	0.999998	19086	0	1.3069	0.00048482	0.0017812	0.588341	56	4	1.3069
VIT	4	0.95542	0.95546	0.999998	18144	0	0.20323	0.00048654	0.0017858	0.588341	57	1	0.20323
TADA2B	4	0.92432	0.92541	0.999998	17556	1	2.2091	0.00052754	0.0019325	0.611546	58	3	2.2091
C6orf1	4	0.99946	0.99947	0.999998	19085	0	0.94277	0.0005408	0.0019781	0.611546	59	4	0.94277
TRIP4	4	0.41166	0.60482	0.997342	11415	1	2.5447	0.00054324	0.0019843	0.611546	60	3	2.5447
TICAM1	4	0.99944	0.99945	0.999998	19084	0	1.0789	0.00055865	0.0020444	0.620069	61	4	1.0789
LPIN3	4	0.033341	0.10097	0.957718	1966	1	2.7571	0.0005693	0.0020967	0.624296	62	3	2.7571
LOC730159	4	0.99908	0.99908	0.999998	19067	0	2.1527	0.00057751	0.0021237	0.624296	63	3	2.1527
SLC41A3	3	0.99941	0.99943	0.999998	19083	0	3.1416	0.00058736	0.0017029	0.588341	64	3	3.1416
C6orf223	4	0.99765	0.99765	0.999998	19026	0	2.9013	0.00062052	0.0022496	0.638614	65	3	2.9013
ZNF275	4	0.12337	0.27268	0.984237	5230	2	-2.727	0.00062165	0.0022522	0.638614	66	2	-2.727
PRPS1	4	0.82161	0.86248	0.999998	16272	1	2.5641	0.00063326	0.0022796	0.638614	67	3	2.5641
OR52L1	4	0.79771	0.85212	0.999998	16055	1	1.4031	0.0006435	0.0023061	0.638614	68	2	1.4031
TSEN54	4	0.99867	0.99863	0.999998	19060	0	2.7291	0.00067089	0.0023776	0.643076	69	3	2.7291
ARID4A	4	0.44235	0.62702	0.997342	11886	2	-2.3561	0.0006757	0.0023895	0.643076	70	2	-2.3561
TGM7	4	0.13591	0.29177	0.991521	5585	2	-4.8971	0.00072974	0.0025366	0.673199	71	1	-4.8971
MORF4L1	4	0.97357	0.97371	0.999998	18517	0	1.9883	0.00077761	0.002661	0.691263	72	3	1.9883
NLRP2	4	0.097959	0.23318	0.982038	4482	3	-6.155	0.00078378	0.0026771	0.691263	73	1	-6.155
C17orf70	4	0.8866	0.89731	0.999998	16986	1	2.5205	0.00080269	0.0027289	0.695248	74	3	2.5205
DDX1	4	0.98605	0.98604	0.999998	18758	0	-0.60379	0.00083781	0.0028165	0.708116	75	1	-0.60379
SLC25A31	4	0.86392	0.88376	0.999998	16712	1	2.1884	0.00085835	0.0028703	0.712293	76	3	2.1884
MED10	4	0.99484	0.99485	0.999998	18956	0	2.1462	0.0008828	0.0029455	0.721566	77	3	2.1462
IGFBP5	4	0.08712	0.21585	0.979226	4157	3	-5.9261	0.00094588	0.0031046	0.737211	78	1	-5.9261
HIST2H2AA4	2	0.99492	0.99487	0.999998	18959	0	4.3496	0.00094599	0.001819	0.589109	79	2	4.3496
GATAD1	4	0.20349	0.38991	0.993092	7360	1	1.9733	0.00094936	0.0031165	0.737211	80	2	1.9733
CLDND2	4	0.27175	0.48183	0.993114	9092	1	1.5114	0.00097358	0.0031797	0.737211	81	2	1.5114
FAM216A	4	0.31563	0.53579	0.996221	10094	1	2.8892	0.00099318	0.0032253	0.737211	82	3	2.8892
OR2AP1	4	0.55522	0.71104	0.999998	13403	2	-1.0432	0.00099991	0.0032408	0.737211	83	2	-1.0432
TMEM256	4	0.38246	0.58353	0.997342	10995	1	2.7006	0.0010289	0.0033144	0.745079	84	3	2.7006
PANK1	4	0.10159	0.23881	0.98229	4586	2	-4.8947	0.0010539	0.0033869	0.74956	85	1	-4.8947
CENPJ	4	0.99476	0.99478	0.999998	18952	0	1.8441	0.0010871	0.0034761	0.74956	86	3	1.8441
PSMA1	4	0.28664	0.50098	0.993114	9437	1	2.1892	0.0010877	0.0034766	0.74956	87	3	2.1892
C6orf118	4	0.9956	0.99559	0.999998	18979	0	2.8635	0.0010949	0.0034968	0.74956	88	3	2.8635
CLTA	4	0.61673	0.75828	0.999998	14202	2	-3.6405	0.001108	0.0035305	0.74956	89	1	-3.6405
SOX15	3	0.99888	0.9989	0.999998	19064	0	1.997	0.0011247	0.0031999	0.737211	90	3	1.997
OTUD5	4	0.48446	0.65809	0.999998	12468	1	2.0215	0.001148	0.0036279	0.761778	91	3	2.0215
RBBP4	4	0.51204	0.67867	0.999998	12830	2	-3.0489	0.001162	0.0036714	0.762538	92	1	-3.0489
PPP1CC	4	0.84192	0.87209	0.999998	16461	1	2.0463	0.0012055	0.0037808	0.771131	93	3	2.0463
CD81	4	0.37043	0.57494	0.997342	10844	1	-2.8054	0.001216	0.0038051	0.771131	94	1	-2.8054
MDH1	4	0.86065	0.8819	0.999998	16672	1	2.2646	0.00127	0.0039471	0.771131	95	3	2.2646
GMCL1	4	0.64055	0.77668	0.999998	14571	2	0.31279	0.0012829	0.0039766	0.771131	96	2	0.31279
ESRRB	4	0.40863	0.60253	0.997342	11381	1	1.9653	0.0012969	0.0040077	0.771131	97	2	1.9653
RELB	4	0.92432	0.92541	0.999998	17566	1	0.73257	0.0013133	0.0040507	0.771131	98	2	0.73257
IFITM1	4	0.54303	0.70185	0.999998	13213	2	-4.7416	0.001324	0.0040823	0.771131	99	1	-4.7416
TAF6L	4	0.89694	0.90418	0.999998	17149	1	2.1591	0.001376	0.0042103	0.771131	100	3	2.1591
C19orf67	4	0.79063	0.84922	0.999998	15981	1	1.5083	0.0013775	0.0042134	0.771131	101	3	1.5083
MLLT11	4	0.84812	0.87523	0.999998	16523	1	2.6377	0.0013781	0.004216	0.771131	102	3	2.6377
PNMA3	4	0.62877	0.76763	0.999998	14380	2	0.65787	0.0014042	0.0042901	0.771131	103	2	0.65787
CNGA2	4	0.14022	0.2983	0.991831	5693	1	1.8764	0.0014058	0.0042924	0.771131	104	3	1.8764
HIST1H4K	4	0.55522	0.71104	0.999998	13404	2	-0.78253	0.0014066	0.0042953	0.771131	105	2	-0.78253
HIST2H4B	4	0.17616	0.35127	0.992673	6633	1	-0.46349	0.0014212	0.0043336	0.771131	106	2	-0.46349
DYRK3	4	0.60344	0.74803	0.999998	14058	1	-0.69565	0.0014321	0.0043585	0.771131	107	2	-0.69565
RPRD1B	3	0.59966	0.69744	0.999998	13997	1	3.2913	0.0014534	0.0040927	0.771131	108	2	3.2913
DNAJC5G	4	0.98195	0.98197	0.999998	18672	0	2.1628	0.0014597	0.0044259	0.772234	109	3	2.1628
ZNF219	4	0.6432	0.77874	0.999998	14578	2	-3.904	0.0014861	0.0044943	0.772234	110	1	-3.904
MIEF2	4	0.48446	0.65809	0.999998	12474	1	2.019	0.001513	0.0045637	0.772234	111	3	2.019
MBNL1	4	0.71204	0.82106	0.999998	15379	1	0.84366	0.0015257	0.0046015	0.772234	112	2	0.84366
VHLL	4	0.94522	0.94522	0.999998	17958	0	1.3078	0.0015282	0.0046072	0.772234	113	2	1.3078
VPS39	4	0.40518	0.60004	0.997342	11324	2	-4.7173	0.0015671	0.0047005	0.774283	114	1	-4.7173
OR4X2	4	0.56152	0.7159	0.999998	13467	2	-1.1716	0.0015671	0.0047005	0.774283	115	2	-1.1716
MRPL24	4	0.85437	0.87847	0.999998	16597	1	1.6932	0.0015952	0.0047792	0.780528	116	3	1.6932
SPOCK1	3	0.38566	0.5407	0.997269	11068	1	3.538	0.0016215	0.0045891	0.772234	117	2	3.538
CNPY1	4	0.99661	0.99664	0.999998	19005	0	1.6804	0.0016689	0.0049663	0.804204	118	3	1.6804
PRKAB1	4	0.27274	0.48312	0.993114	9111	2	-4.0073	0.0017021	0.0050528	0.810932	119	1	-4.0073
ETV4	4	0.79771	0.85212	0.999998	16045	1	1.9271	0.0017538	0.0051927	0.810955	120	3	1.9271
SAMD10	4	0.23229	0.4295	0.993114	8108	3	-5.3953	0.0017561	0.005199	0.810955	121	1	-5.3953
PER3	4	0.67293	0.80206	0.999998	15015	1	1.9719	0.0017628	0.0052202	0.810955	122	3	1.9719
DES	3	0.99023	0.99036	0.999998	18844	0	1.5876	0.0018035	0.0050927	0.810932	123	2	1.5876
SLC44A3	4	0.35154	0.56143	0.997342	10589	2	-3.3854	0.0018101	0.0053363	0.816321	124	1	-3.3854
WHSC1	4	0.99937	0.99938	0.999998	19080	0	1.9217	0.0018138	0.0053438	0.816321	125	3	1.9217
PRB4	4	0.99826	0.99825	0.999998	19044	0	1.8168	0.0018285	0.0053829	0.816321	126	3	1.8168
IRGQ	4	0.99392	0.99395	0.999998	18926	0	1.8544	0.0018452	0.0054363	0.817923	127	3	1.8544
RPS6KA5	4	0.77332	0.84237	0.999998	15843	1	-1.2928	0.0018911	0.005557	0.824001	128	1	-1.2928
RPTN	4	0.63236	0.7704	0.999998	14456	1	2.2196	0.0019329	0.0056726	0.824001	129	3	2.2196
KANK3	4	0.11765	0.26387	0.984237	5072	2	-1.5419	0.0019655	0.0057555	0.824001	130	2	-1.5419
ST18	3	0.71507	0.75668	0.999998	15389	1	-3.4696	0.002006	0.0056461	0.824001	131	1	-3.4696
AK7	4	0.70158	0.8178	0.999998	15326	1	1.1729	0.0020087	0.0058669	0.824001	132	2	1.1729
APOF	4	0.0075214	0.025542	0.882055	538	2	-2.5279	0.0020261	0.0059202	0.824001	133	1	-2.5279
SMAD2	4	0.57038	0.72259	0.999998	13580	1	2.1096	0.0020322	0.005941	0.824001	134	3	2.1096
CUBN	4	0.99843	0.99841	0.999998	19052	0	1.6979	0.0020362	0.0059524	0.824001	135	3	1.6979
SLC6A13	4	0.95887	0.95889	0.999998	18227	0	1.882	0.0020481	0.0059824	0.824001	136	3	1.882
JAKMIP3	4	0.93915	0.93923	0.999998	17843	0	2.384	0.0020631	0.0060239	0.824001	137	3	2.384
RAB33B	4	0.99791	0.9979	0.999998	19034	0	0.88284	0.00208	0.0060664	0.824001	138	2	0.88284
MLLT1	4	0.99921	0.99921	0.999998	19074	0	2.2432	0.0020942	0.0061119	0.824001	139	3	2.2432
KRT72	4	0.92682	0.92759	0.999998	17612	1	1.9279	0.0021205	0.0061892	0.824001	140	3	1.9279
KLF9	4	0.92432	0.92541	0.999998	17569	1	-0.10816	0.002134	0.0062218	0.824001	141	2	-0.10816
C10orf53	4	0.7265	0.8258	0.999998	15468	1	1.2456	0.002135	0.006227	0.824001	142	2	1.2456
DHRS1	4	0.91826	0.92017	0.999998	17470	1	2.059	0.0021419	0.0062513	0.824001	143	3	2.059
RAD54B	4	0.39378	0.59176	0.997342	11147	1	2.3619	0.0021425	0.0062529	0.824001	144	3	2.3619
FOXI1	4	0.11119	0.25389	0.98229	4883	2	-1.5745	0.0021425	0.0062529	0.824001	145	2	-1.5745
TXNDC12	4	0.022118	0.069736	0.950916	1376	1	2.0059	0.0021883	0.0063679	0.827743	146	3	2.0059
INSM1	4	0.24785	0.45037	0.993114	8500	3	-4.3382	0.002242	0.0065161	0.830915	147	1	-4.3382
ODF3L2	3	0.54596	0.67377	0.999998	13265	1	-4.244	0.002249	0.0063032	0.824936	148	1	-4.244
ITGB1	4	0.97513	0.9753	0.999998	18545	0	1.4937	0.0022502	0.0065451	0.830915	149	3	1.4937
HAGHL	3	0.79882	0.81069	0.999998	16060	1	0.83411	0.0023299	0.006528	0.830915	150	2	0.83411
2001-12-01	4	0.012887	0.042395	0.916451	871	1	1.0611	0.0023362	0.0067747	0.830915	151	2	1.0611
C16orf91	4	0.89383	0.90205	0.999998	17094	1	-1.2248	0.0023499	0.0068115	0.830915	152	1	-1.2248
EPS8L3	4	0.10159	0.23881	0.98229	4583	1	1.4803	0.0023958	0.0069322	0.830915	153	2	1.4803
SERINC1	4	0.28037	0.49295	0.993114	9304	1	1.6608	0.0024113	0.0069669	0.830915	154	3	1.6608
FLJ45513	4	0.95086	0.95091	0.999998	18064	0	1.819	0.0024379	0.0070358	0.830915	155	3	1.819
FUT2	4	0.87517	0.89031	0.999998	16838	1	1.9043	0.0024401	0.0070395	0.830915	156	2	1.9043
PCDHB3	3	0.99601	0.99611	0.999998	18992	0	3.3866	0.0024528	0.0068488	0.830915	157	2	3.3866
RPRD2	4	0.98647	0.98642	0.999998	18771	0	1.6182	0.0024536	0.0070773	0.830915	158	3	1.6182
CCL19	4	0.99125	0.99127	0.999998	18859	0	0.86008	0.0024579	0.0070923	0.830915	159	2	0.86008
GIGYF2	4	0.92946	0.92993	0.999998	17649	1	2.2998	0.0024689	0.0071156	0.830915	160	3	2.2998
ERV3-1	4	0.99764	0.99764	0.999998	19025	0	1.9045	0.0024963	0.0071897	0.830915	161	3	1.9045
SPNS3	4	0.75525	0.83572	0.999998	15690	1	1.9354	0.0025093	0.0072187	0.830915	162	3	1.9354
GPR15	4	0.44894	0.63176	0.998417	11969	2	-2.0516	0.0025119	0.0072234	0.830915	163	1	-2.0516
BICC1	3	0.99746	0.99749	0.999998	19022	0	0.88493	0.0025398	0.0070871	0.830915	164	3	0.88493
ADAM28	4	0.12484	0.27494	0.985922	5288	1	1.8263	0.0025533	0.0073219	0.830915	165	3	1.8263
ECT2	4	0.35963	0.56714	0.997342	10699	1	-1.5011	0.0025658	0.0073555	0.830915	166	2	-1.5011
BRPF1	4	0.98267	0.9827	0.999998	18689	0	2.0958	0.0026018	0.0074462	0.830915	167	3	2.0958
SS18	4	0.9994	0.99942	0.999998	19081	0	1.9022	0.0026122	0.0074789	0.830915	168	3	1.9022
FAAH2	3	0.060517	0.14243	0.970299	3265	1	-4.244	0.0026133	0.0072866	0.830915	169	1	-4.244
B4GALT7	4	0.86721	0.88563	0.999998	16730	1	-0.55186	0.0026198	0.0075011	0.830915	170	2	-0.55186
ZFP30	3	0.85572	0.85669	0.999998	16615	1	2.7646	0.0026204	0.0073068	0.830915	171	2	2.7646
CARNS1	4	0.45951	0.63961	0.998582	12129	2	-1.1138	0.0026314	0.0075322	0.830915	172	2	-1.1138
RERGL	4	0.67658	0.80499	0.999998	15056	1	1.9797	0.0026446	0.0075664	0.830915	173	3	1.9797
TRIM16L	4	0.94757	0.94763	0.999998	18005	0	1.5632	0.0026898	0.0076742	0.836509	174	3	1.5632
LINC00452	4	0.071889	0.19084	0.979074	3652	1	1.0663	0.0027078	0.0077286	0.836509	175	2	1.0663
VPS33A	4	0.78367	0.84645	0.999998	15921	1	1.4679	0.0027262	0.0077721	0.836509	176	3	1.4679
USP11	4	0.85741	0.88013	0.999998	16632	1	1.668	0.002775	0.0079136	0.836509	177	3	1.668
SPRR2E	4	0.98692	0.98687	0.999998	18775	0	0.62769	0.0027817	0.0079348	0.836509	178	2	0.62769
KCNN3	4	0.21854	0.41088	0.993114	7752	1	1.7132	0.0027877	0.0079519	0.836509	179	3	1.7132
PGRMC1	4	0.98939	0.98938	0.999998	18822	0	1.7425	0.0028036	0.0079975	0.836509	180	3	1.7425
DHRS13	4	0.79431	0.85072	0.999998	16015	1	1.8548	0.0028091	0.008012	0.836509	181	3	1.8548
TULP1	4	0.69794	0.81669	0.999998	15292	1	-3.4578	0.0028356	0.0080851	0.836509	182	1	-3.4578
KIAA1586	4	0.85741	0.88013	0.999998	16625	1	-0.35753	0.0028896	0.0082348	0.836509	183	2	-0.35753
MEIS3	4	0.65819	0.79042	0.999998	14813	1	1.6569	0.0028967	0.0082494	0.836509	184	2	1.6569
SERPINA6	4	0.29998	0.51786	0.993114	9778	1	1.7413	0.0028967	0.0082494	0.836509	185	2	1.7413
LRRC75A	4	0.10159	0.23881	0.98229	4587	1	-0.19256	0.0029088	0.0082799	0.836509	186	2	-0.19256
AP4B1	4	0.98972	0.98969	0.999998	18829	0	1.8147	0.0029191	0.00831	0.836509	187	3	1.8147
ZNF70	4	0.62877	0.76763	0.999998	14386	1	-4.2861	0.0029435	0.0083805	0.836509	188	1	-4.2861
OXTR	4	0.84812	0.87523	0.999998	16528	1	1.5756	0.002986	0.0084862	0.836509	189	3	1.5756
HLA-DQB1	3	0.99192	0.99204	0.999998	18871	0	2.796	0.0029893	0.0083203	0.836509	190	2	2.796
CHAF1A	4	0.96809	0.96815	0.999998	18398	0	0.16599	0.0029961	0.0085157	0.836509	191	2	0.16599
IRS1	4	0.99776	0.99776	0.999998	19029	0	1.7768	0.0030089	0.0085489	0.836509	192	3	1.7768
MEN1	4	0.97424	0.97439	0.999998	18522	0	1.4287	0.00303	0.0085981	0.836509	193	3	1.4287
FUT5	4	0.9972	0.9972	0.999998	19018	0	1.7259	0.0030435	0.0086297	0.836509	194	3	1.7259
PAQR9	4	0.09309	0.2255	0.979748	4325	2	-3.5344	0.0030514	0.0086463	0.836509	195	1	-3.5344
DCUN1D2	4	0.092096	0.22392	0.979748	4295	1	1.3854	0.0030526	0.0086494	0.836509	196	2	1.3854
LPAR2	4	0.97014	0.97021	0.999998	18454	0	1.6941	0.0030602	0.008668	0.836509	197	3	1.6941
UEVLD	4	0.98292	0.98294	0.999998	18699	0	1.2312	0.0030953	0.0087556	0.84034	198	2	1.2312
HOXD13	4	0.96338	0.96341	0.999998	18308	0	0.79874	0.0031132	0.0088007	0.84034	199	2	0.79874
MCL1	4	0.98767	0.98766	0.999998	18791	0	1.6724	0.0031521	0.0089043	0.84034	200	3	1.6724
PLCXD3	4	0.50648	0.67454	0.999998	12778	1	1.9382	0.0031581	0.008924	0.84034	201	3	1.9382
TTPAL	4	0.6368	0.77377	0.999998	14502	2	-3.1304	0.0031593	0.0089276	0.84034	202	1	-3.1304
FLVCR2	4	0.58086	0.73063	0.999998	13697	1	1.8183	0.0031832	0.0089971	0.841079	203	3	1.8183
LRIT3	4	0.83504	0.86884	0.999998	16411	1	1.5104	0.0032097	0.0090598	0.841079	204	3	1.5104
NOD1	4	0.60294	0.74765	0.999998	14032	2	-2.5194	0.0032133	0.0090675	0.841079	205	1	-2.5194
PAX2	4	0.59604	0.74228	0.999998	13949	2	-3.7839	0.0032672	0.0092105	0.84613	206	1	-3.7839
ZNF708	3	0.405	0.56026	0.997342	11299	1	2.684	0.0033105	0.0091727	0.84613	207	2	2.684
LOXL3	4	0.021472	0.067898	0.950916	1338	3	-6.5578	0.0033211	0.0093411	0.853667	208	1	-6.5578
LEMD3	4	0.93813	0.93819	0.999998	17823	0	1.6835	0.003344	0.0094017	0.853667	209	3	1.6835
CD33	4	0.98444	0.98443	0.999998	18727	0	0.79485	0.0033538	0.0094266	0.853667	210	2	0.79485
OSMR	4	0.055291	0.15766	0.970602	3040	2	-1.8166	0.0033751	0.0094846	0.854871	211	1	-1.8166
BLOC1S3	4	0.92682	0.92759	0.999998	17613	1	-2.852	0.003429	0.0096282	0.863734	212	1	-2.852
SIK2	4	0.63051	0.76896	0.999998	14444	1	1.4518	0.0034496	0.00968	0.864324	213	3	1.4518
FOXD4L3	3	0.87748	0.87757	0.999998	16865	0	2.9289	0.0035435	0.0098085	0.8666	214	2	2.9289
SYCE2	4	0.94393	0.94404	0.999998	17927	0	0.90486	0.0035534	0.0099277	0.8666	215	2	0.90486
S100A2	4	0.94157	0.94165	0.999998	17894	0	-1.7561	0.0035908	0.010019	0.8666	216	2	-1.7561
GEMIN2	4	0.83133	0.86707	0.999998	16351	1	-0.93562	0.0035908	0.010019	0.8666	217	1	-0.93562
TMEM211	4	0.59602	0.74227	0.999998	13933	1	-0.893	0.0035908	0.010019	0.8666	218	1	-0.893
CARF	4	0.99585	0.99584	0.999998	18986	0	1.7452	0.0035931	0.010025	0.8666	219	3	1.7452
THEM5	4	0.41457	0.60688	0.997342	11444	1	2.0622	0.0035981	0.010042	0.8666	220	3	2.0622
MOB3B	4	0.20538	0.3926	0.993092	7445	1	1.8831	0.0036283	0.010128	0.8666	221	3	1.8831
FOXRED2	4	0.82319	0.86322	0.999998	16283	1	-0.25724	0.003634	0.010146	0.8666	222	2	-0.25724
LARP1B	4	0.47176	0.64863	0.999487	12299	1	1.2948	0.00365	0.010187	0.8666	223	3	1.2948
CCL16	4	0.99285	0.99287	0.999998	18891	0	1.6476	0.0036848	0.010273	0.8666	224	3	1.6476
TXN	2	0.92578	0.92561	0.999998	17594	0	1.7776	0.0037138	0.0072286	0.830915	225	1	1.7776
MYO3A	4	0.07895	0.20253	0.979074	3866	1	1.7518	0.0037233	0.010384	0.8666	226	2	1.7518
CACYBP	4	0.1116	0.25453	0.98229	4895	2	-1.3961	0.003735	0.010409	0.8666	227	2	-1.3961
TMEM88B	3	0.99626	0.99634	0.999998	18996	0	1.1572	0.0037353	0.010326	0.8666	228	3	1.1572
GCNT1	4	0.71204	0.82106	0.999998	15381	1	0.70506	0.0037389	0.010417	0.8666	229	2	0.70506
LOC643355	4	0.0057648	0.01984	0.86533	428	2	-2.4882	0.0037525	0.010451	0.8666	230	2	-2.4882
TRIM77	4	0.59291	0.7399	0.999998	13906	2	-0.24682	0.0038064	0.01058	0.8666	231	2	-0.24682
CPXM1	4	0.67293	0.80206	0.999998	15024	1	1.1436	0.0038492	0.010699	0.8666	232	2	1.1436
GPR65	4	0.68523	0.81174	0.999998	15184	2	-0.73897	0.0038572	0.010716	0.8666	233	2	-0.73897
AGPAT5	4	0.37635	0.57917	0.997342	10922	2	-0.88417	0.0038604	0.010726	0.8666	234	2	-0.88417
TRAPPC2	4	0.293	0.50902	0.993114	9604	2	-1.3424	0.0038731	0.010756	0.8666	235	2	-1.3424
LRRC49	3	0.020879	0.053773	0.945597	1296	1	2.8558	0.0038946	0.010659	0.8666	236	2	2.8558
MIPOL1	4	0.98293	0.98295	0.999998	18700	0	1.4374	0.0038984	0.010818	0.8666	237	3	1.4374
WIPI1	4	0.40034	0.59653	0.997342	11263	2	-4.9585	0.0039143	0.010854	0.8666	238	1	-4.9585
MAST3	4	0.98692	0.98687	0.999998	18776	0	1.9176	0.0039721	0.010993	0.8666	239	3	1.9176
GALNT11	4	0.97217	0.97232	0.999998	18483	0	1.3653	0.003982	0.011026	0.8666	240	3	1.3653
CD180	4	0.52618	0.68932	0.999998	13021	1	1.2122	0.0039927	0.011055	0.8666	241	3	1.2122
TDRD12	4	0.97217	0.97232	0.999998	18487	0	-0.006671	0.0039951	0.011062	0.8666	242	2	-0.006671
SLC26A4	4	0.12843	0.28044	0.985922	5370	1	-2.0769	0.0039951	0.011062	0.8666	243	1	-2.0769
CMKLR1	4	0.98195	0.98197	0.999998	18673	0	1.7331	0.0039966	0.011066	0.8666	244	3	1.7331
PFN2	4	0.66669	0.79712	0.999998	14931	2	-1.784	0.004076	0.011282	0.879875	245	1	-1.784
ARL17B	4	0.62617	0.7656	0.999998	14362	2	0.28252	0.0040949	0.011338	0.880645	246	2	0.28252
MYH1	4	0.90312	0.90856	0.999998	17238	1	-2.4189	0.0041299	0.01143	0.882781	247	1	-2.4189
ARMCX2	4	0.19576	0.37904	0.992673	7137	3	-5.2427	0.0041838	0.011563	0.882781	248	1	-5.2427
FUT9	4	0.98611	0.9861	0.999998	18762	0	1.262	0.0042239	0.011674	0.882781	249	3	1.262
ZNF184	4	0.2373	0.43627	0.993114	8244	2	-1.8025	0.004235	0.011705	0.882781	250	2	-1.8025
FHOD1	4	0.20535	0.39255	0.993092	7424	2	-2.369	0.0042377	0.011712	0.882781	251	2	-2.369
ZNF431	4	0.87644	0.89106	0.999998	16855	1	1.2994	0.004275	0.011809	0.882781	252	3	1.2994
OTUD3	4	0.056807	0.16137	0.970602	3095	3	-6.5138	0.0042916	0.011846	0.882781	253	1	-6.5138
ZFPM2	4	0.82161	0.86248	0.999998	16261	1	1.4378	0.0043007	0.011872	0.882781	254	3	1.4378
PARPBP	4	0.8922	0.90099	0.999998	17078	1	0.52068	0.0043059	0.011884	0.882781	255	2	0.52068
RALGAPB	4	0.87356	0.88936	0.999998	16809	1	1.5841	0.0043063	0.011884	0.882781	256	3	1.5841
LTB	4	0.91161	0.91486	0.999998	17343	1	1.3933	0.0043206	0.011919	0.882781	257	2	1.3933
PTPDC1	4	0.90312	0.90856	0.999998	17230	1	1.5849	0.0043914	0.012083	0.884545	258	3	1.5849
LMX1B	4	0.19162	0.37331	0.992673	7057	3	-5.1687	0.0043994	0.012101	0.884545	259	1	-5.1687
LOC728392	4	0.95086	0.95091	0.999998	18062	0	1.8205	0.0044061	0.012113	0.884545	260	3	1.8205
SEZ6	4	0.91675	0.91898	0.999998	17450	1	1.5526	0.004429	0.012168	0.884545	261	3	1.5526
C1QTNF9B	3	0.76426	0.78702	0.999998	15761	1	-0.69202	0.0044339	0.011623	0.882781	262	1	-0.69202
ACAP1	4	0.64989	0.78402	0.999998	14693	2	-0.95587	0.0044452	0.01221	0.884545	263	2	-0.95587
OTOGL	4	0.99695	0.99698	0.999998	19012	0	1.507	0.0044487	0.012221	0.884545	264	3	1.507
SLC6A11	4	0.21438	0.40516	0.993114	7636	2	-3.4719	0.0045072	0.012378	0.887939	265	1	-3.4719
ITIH2	4	0.57038	0.72259	0.999998	13579	2	-1.0121	0.0045478	0.01249	0.887939	266	2	-1.0121
TLE1	4	0.99483	0.99483	0.999998	18953	0	1.2332	0.0045598	0.012516	0.887939	267	3	1.2332
AFG3L2	4	0.12054	0.26833	0.984237	5153	3	-5.85	0.004561	0.012519	0.887939	268	1	-5.85
AMTN	4	0.081362	0.20649	0.979074	3961	1	0.43634	0.0046125	0.012647	0.887939	269	2	0.43634
IRF2BP1	4	0.15671	0.32292	0.992673	6128	2	-2.6559	0.0046149	0.012654	0.887939	270	2	-2.6559
ARL5B	4	0.99934	0.99935	0.999998	19078	0	1.2001	0.0046404	0.012718	0.887939	271	3	1.2001
SMCR8	4	0.97137	0.97149	0.999998	18475	0	1.356	0.0046489	0.012738	0.887939	272	3	1.356
PON3	4	0.099941	0.23623	0.98229	4539	1	1.4054	0.0046633	0.012768	0.887939	273	3	1.4054
JAK3	4	0.56152	0.7159	0.999998	13465	2	-2.3475	0.0046688	0.012779	0.887939	274	1	-2.3475
TGIF2LY	4	0.99247	0.99249	0.999998	18879	0	1.2112	0.0046862	0.012827	0.888058	275	3	1.2112
AVEN	4	0.39972	0.59606	0.997342	11233	2	-2.5533	0.0047227	0.012942	0.88957	276	1	-2.5533
C16orf86	4	0.17178	0.34498	0.992673	6528	1	0.32718	0.0047388	0.012982	0.88957	277	2	0.32718
TRIP12	4	0.96477	0.96481	0.999998	18335	0	1.112	0.0047614	0.013035	0.88957	278	3	1.112
TAS2R1	4	0.97894	0.97908	0.999998	18614	0	1.3855	0.0047766	0.01309	0.88957	279	3	1.3855
MYH13	4	0.99528	0.99528	0.999998	18970	0	1.8547	0.0047916	0.013129	0.88957	280	3	1.8547
TTC19	4	0.73382	0.82816	0.999998	15527	1	1.3793	0.0048158	0.013192	0.88957	281	3	1.3793
CCDC121	4	0.64547	0.78056	0.999998	14644	1	0.51978	0.0048402	0.013248	0.88957	282	2	0.51978
GRM3	4	0.33928	0.55268	0.997342	10419	1	1.3488	0.0048478	0.013271	0.88957	283	3	1.3488
SIGLEC11	4	0.099941	0.23623	0.98229	4537	1	1.2869	0.0048687	0.013329	0.88957	284	3	1.2869
DNAJC2	4	0.038205	0.11393	0.963672	2222	2	-4.9192	0.0048843	0.01337	0.88957	285	1	-4.9192
ZDHHC6	4	0.67463	0.80343	0.999998	15039	1	1.0544	0.0048846	0.013371	0.88957	286	2	1.0544
RAB42	4	0.15547	0.32103	0.992673	6069	1	1.4504	0.0049203	0.013457	0.88957	287	3	1.4504
OR14I1	4	0.58881	0.73671	0.999998	13814	1	1.4483	0.0049353	0.013495	0.88957	288	3	1.4483
MED19	4	0.46852	0.64623	0.999487	12248	2	-3.6132	0.0049382	0.013501	0.88957	289	1	-3.6132
NUP210L	4	0.39378	0.59176	0.997342	11154	1	1.7211	0.004974	0.013584	0.891991	290	3	1.7211
NKX1-2	3	0.75282	0.77961	0.999998	15667	1	-4.3746	0.0050402	0.012705	0.887939	291	1	-4.3746
KIF27	4	0.88212	0.89446	0.999998	16934	1	0.77525	0.0050686	0.013832	0.898669	292	2	0.77525
XYLT2	4	0.99841	0.99839	0.999998	19050	0	1.9458	0.0050943	0.013904	0.898669	293	3	1.9458
TLE2	4	0.75898	0.83704	0.999998	15715	1	-0.95883	0.0050998	0.013915	0.898669	294	2	-0.95883
TPM2	4	0.93674	0.93682	0.999998	17797	1	-1.7013	0.0051536	0.01403	0.898669	295	1	-1.7013
COL6A1	4	0.14907	0.31154	0.992673	5933	2	-0.989	0.0051596	0.014047	0.898669	296	2	-0.989
RGR	4	0.043867	0.12884	0.969711	2485	1	1.1887	0.005187	0.014125	0.898669	297	2	1.1887
COPG1	4	0.51266	0.67913	0.999998	12854	1	0.27665	0.0051916	0.014136	0.898669	298	2	0.27665
SPESP1	4	0.69443	0.81566	0.999998	15270	1	-0.7784	0.0052075	0.014181	0.898669	299	1	-0.7784
PLEKHB2	4	0.35365	0.56291	0.997342	10623	2	-0.552	0.0052099	0.014189	0.898669	300	2	-0.552
CALR	4	0.52618	0.68932	0.999998	13022	1	1.2076	0.0052309	0.014243	0.898669	301	3	1.2076
FUCA2	4	0.035224	0.10606	0.959421	2048	2	-2.1957	0.0052605	0.014322	0.898669	302	2	-2.1957
SNAP91	4	0.53707	0.69733	0.999998	13170	2	-1.9329	0.0052614	0.014326	0.898669	303	2	-1.9329
PCGF1	4	0.48247	0.6566	0.999998	12435	2	-1.2223	0.0052698	0.014344	0.898669	304	2	-1.2223
RCC1	4	0.56713	0.7201	0.999998	13525	2	-2.1372	0.0053152	0.014458	0.901005	305	1	-2.1372
RNF121	4	0.22858	0.42445	0.993114	7987	1	1.8266	0.0053578	0.014568	0.901005	306	3	1.8266
PPP2CA	4	0.88959	0.89925	0.999998	17033	1	1.1931	0.0053691	0.014595	0.901005	307	3	1.1931
INHBA	4	0.37635	0.57917	0.997342	10929	1	0.42991	0.0054229	0.014734	0.901005	308	2	0.42991
ANKS6	4	0.24264	0.44336	0.993114	8394	2	-3.5849	0.0054768	0.014867	0.901005	309	1	-3.5849
NSUN5	4	0.23041	0.42693	0.993114	8019	2	-0.95351	0.0054887	0.014899	0.901005	310	2	-0.95351
FHL3	4	0.090008	0.22051	0.979748	4229	2	-3.4019	0.0055306	0.015013	0.901005	311	1	-3.4019
EFCAB2	4	0.45323	0.63496	0.998417	12046	2	-1.3136	0.0055406	0.015039	0.901005	312	2	-1.3136
S1PR3	4	0.37335	0.57705	0.997342	10891	1	1.5061	0.0055453	0.015052	0.901005	313	2	1.5061
CHPF2	4	0.99848	0.99846	0.999998	19055	0	1.2122	0.0055814	0.015142	0.901005	314	3	1.2122
SMARCA2	4	0.85741	0.88013	0.999998	16634	1	0.02032	0.0055844	0.01515	0.901005	315	1	0.02032
FLRT2	4	0.11649	0.26206	0.984237	5049	1	1.379	0.0055986	0.015184	0.901005	316	3	1.379
TMEM100	4	0.99804	0.99803	0.999998	19037	0	1.1441	0.005611	0.015223	0.901005	317	3	1.1441
TDRD6	4	0.43174	0.61932	0.997342	11734	2	-1.2622	0.0056355	0.015286	0.901005	318	2	-1.2622
ELK1	4	0.95086	0.95091	0.999998	18071	0	-0.82199	0.0056383	0.015291	0.901005	319	1	-0.82199
ZDHHC3	3	0.76059	0.78465	0.999998	15735	1	-3.4817	0.0056464	0.013771	0.898669	320	1	-3.4817
PLCD4	4	0.27832	0.49029	0.993114	9241	1	-0.045031	0.0056474	0.015312	0.901005	321	2	-0.045031
ATF7IP	4	0.94714	0.9472	0.999998	17987	0	0.98665	0.0056791	0.015392	0.901005	322	3	0.98665
ITSN1	4	0.76774	0.84029	0.999998	15782	1	1.6694	0.0056829	0.015403	0.901005	323	3	1.6694
FCF1	4	0.51266	0.67913	0.999998	12850	2	-4.554	0.0056921	0.015431	0.901005	324	1	-4.554
IKZF1	4	0.88379	0.89553	0.999998	16949	1	1.6939	0.0056993	0.01545	0.901005	325	3	1.6939
RTN3	4	0.98622	0.9862	0.999998	18767	0	1.5612	0.0057302	0.015526	0.901005	326	3	1.5612
TRIM3	4	0.99235	0.99237	0.999998	18877	0	1.0008	0.005746	0.01556	0.901005	327	3	1.0008
ERCC6-PGBD3	4	0.98982	0.98979	0.999998	18834	0	1.28	0.0057992	0.015695	0.901005	328	3	1.28
LIPF	4	0.312	0.53292	0.996221	10055	2	-3.5036	0.0057998	0.015696	0.901005	329	1	-3.5036
CHML	4	0.43891	0.62451	0.997342	11842	1	1.0716	0.0058034	0.015702	0.901005	330	2	1.0716
GOLGA6L2	4	0.39972	0.59606	0.997342	11223	1	2.0743	0.0058324	0.015777	0.901998	331	3	2.0743
UQCR11	4	0.35154	0.56143	0.997342	10596	2	-3.3349	0.0058536	0.015833	0.901998	332	1	-3.3349
ARHGEF26	4	0.86392	0.88376	0.999998	16715	1	1.2807	0.0058973	0.015951	0.901998	333	3	1.2807
CYP4F12	4	0.84192	0.87209	0.999998	16475	1	1.3901	0.0059053	0.015976	0.901998	334	2	1.3901
ZNF254	4	0.78517	0.84705	0.999998	15947	1	1.0491	0.005917	0.015999	0.901998	335	3	1.0491
C1orf228	4	0.82801	0.86545	0.999998	16316	1	1.2171	0.00592	0.016003	0.901998	336	3	1.2171
ERICH5	4	0.28037	0.49295	0.993114	9303	2	-2.5802	0.0059613	0.016115	0.905664	337	1	-2.5802
FOXP2	4	0.82801	0.86545	0.999998	16331	1	0.33526	0.0059884	0.016199	0.907712	338	2	0.33526
CHP1	4	0.61976	0.76061	0.999998	14267	2	0.041885	0.006013	0.016267	0.90885	339	2	0.041885
KDM5D	4	0.44768	0.63083	0.998417	11942	2	-1.3586	0.0061662	0.016654	0.91194	340	2	-1.3586
SIGLEC10	4	0.50575	0.67399	0.999998	12761	2	-2.4605	0.0061766	0.016681	0.91194	341	1	-2.4605
TNFSF12	4	0.92088	0.92244	0.999998	17513	1	-1.533	0.0062304	0.016811	0.91194	342	1	-1.533
YIPF2	4	0.97424	0.97439	0.999998	18526	0	0.89704	0.0062643	0.016895	0.91194	343	3	0.89704
SMIM10L1	4	0.85437	0.87847	0.999998	16601	1	0.31235	0.0062643	0.016895	0.91194	344	3	0.31235
ZCCHC13	4	0.99566	0.99565	0.999998	18981	0	0.23849	0.0062643	0.016895	0.91194	345	3	0.23849
FAM220A	4	0.81105	0.85778	0.999998	16157	1	0.42226	0.0062643	0.016895	0.91194	346	3	0.42226
ASAH2B	4	0.43063	0.61855	0.997342	11692	1	0.7285	0.0062643	0.016895	0.91194	347	3	0.7285
HTR1D	4	0.66575	0.79636	0.999998	14929	1	-0.67652	0.0062643	0.016895	0.91194	348	3	-0.67652
CDH10	4	0.53641	0.69683	0.999998	13135	1	0.48735	0.0062643	0.016895	0.91194	349	3	0.48735
ATG4B	4	0.20953	0.39847	0.993114	7517	3	-5.399	0.0062842	0.016945	0.912076	350	1	-5.399
STATH	4	0.80429	0.8549	0.999998	16110	1	-1.9636	0.006338	0.017074	0.91644	351	1	-1.9636
TMEM151A	3	0.16512	0.31055	0.992673	6350	1	2.1087	0.0063523	0.015036	0.901005	352	2	2.1087
SF3A2	3	0.88829	0.88839	0.999998	17025	0	-3.4022	0.0063734	0.015075	0.901005	353	1	-3.4022
RNF149	4	0.47469	0.65083	0.999487	12334	1	-2.3931	0.0063918	0.017218	0.919652	354	1	-2.3931
RAB11FIP4	4	0.9462	0.94623	0.999998	17974	0	1.2632	0.0064071	0.017259	0.919652	355	2	1.2632
DDX50	4	0.80579	0.85553	0.999998	16115	1	1.2176	0.006435	0.017326	0.919652	356	2	1.2176
ZCCHC5	4	0.38556	0.58576	0.997342	11060	2	-1.7455	0.0064457	0.017356	0.919652	357	2	-1.7455
LRRC38	4	0.97424	0.97439	0.999998	18528	0	1.8549	0.0064986	0.017485	0.919652	358	3	1.8549
SETD8	4	0.6432	0.77874	0.999998	14602	2	-3.9515	0.0065264	0.017553	0.919652	359	1	-3.9515
MIA2	4	0.36597	0.57177	0.997342	10780	2	-2.6009	0.0065264	0.017553	0.919652	360	1	-2.6009
PIGO	4	0.99346	0.99349	0.999998	18909	0	1.4205	0.0065777	0.017688	0.919652	361	3	1.4205
TRAF5	4	0.98312	0.98312	0.999998	18706	0	1.2815	0.0065856	0.017708	0.919652	362	2	1.2815
CILP	4	0.20024	0.38537	0.992673	7289	3	-5.2299	0.0066071	0.017758	0.919652	363	1	-5.2299
PTX3	4	0.93182	0.93212	0.999998	17704	1	1.1895	0.0066691	0.017921	0.919652	364	3	1.1895
PSME3	4	0.31622	0.53622	0.996221	10120	2	-0.49999	0.0066705	0.017925	0.919652	365	2	-0.49999
CUL7	4	0.36779	0.57304	0.997342	10815	1	1.7913	0.0066819	0.017957	0.919652	366	3	1.7913
VPS35	3	0.2777	0.42975	0.993114	9229	2	-5.5195	0.0066964	0.01562	0.901005	367	1	-5.5195
LTV1	4	0.25895	0.46514	0.993114	8776	3	-5.2183	0.0067147	0.018051	0.919652	368	1	-5.2183
FAM171A2	4	0.83504	0.86884	0.999998	16419	1	-0.43391	0.0067147	0.018051	0.919652	369	2	-0.43391
MAP3K6	4	0.55314	0.70945	0.999998	13364	1	-0.72165	0.0067196	0.018065	0.919652	370	2	-0.72165
SLC35A1	4	0.05117	0.14727	0.970602	2843	2	-1.4712	0.0068223	0.018327	0.919652	371	2	-1.4712
TBL1Y	4	0.31622	0.53622	0.996221	10103	2	-2.0053	0.006876	0.018451	0.919652	372	2	-2.0053
RNF166	4	0.97217	0.97232	0.999998	18496	0	0.90486	0.0069298	0.018582	0.919652	373	2	0.90486
NUCKS1	4	0.51931	0.68415	0.999998	12940	1	1.3162	0.0069744	0.018706	0.919652	374	3	1.3162
VSNL1	4	0.23229	0.4295	0.993114	8101	2	-1.753	0.0069836	0.01873	0.919652	375	1	-1.753
SERPINB4	4	0.23411	0.432	0.993114	8160	1	1.6331	0.0069969	0.018771	0.919652	376	3	1.6331
ATP4A	4	0.80429	0.8549	0.999998	16111	1	1.5362	0.0070295	0.018845	0.919652	377	3	1.5362
FNBP1	4	0.92184	0.92329	0.999998	17523	1	1.0319	0.0070374	0.018861	0.919652	378	3	1.0319
MYH8	4	0.86065	0.8819	0.999998	16669	1	1.3351	0.007056	0.01891	0.919652	379	3	1.3351
ABCC8	4	0.99692	0.99694	0.999998	19011	0	0.4145	0.0070892	0.018997	0.919652	380	3	0.4145
PPM1H	4	0.19078	0.37208	0.992673	7013	2	-5.1472	0.0071181	0.019077	0.919652	381	1	-5.1472
GNL2	4	0.60695	0.75072	0.999998	14091	1	-2.8048	0.0071181	0.019077	0.919652	382	1	-2.8048
PEG3	4	0.47143	0.64838	0.999487	12271	2	-2.6448	0.0071987	0.019283	0.919652	383	1	-2.6448
C1orf122	4	0.71577	0.82227	0.999998	15398	1	-0.55577	0.0072714	0.01945	0.919652	384	2	-0.55577
ADM5	3	0.6031	0.699	0.999998	14052	1	-1.1352	0.0073018	0.016669	0.91194	385	1	-1.1352
FAM92A1	4	0.29942	0.51716	0.993114	9740	2	-3.0614	0.0073063	0.019537	0.919652	386	1	-3.0614
TMEM144	4	0.99571	0.9957	0.999998	18984	0	1.7053	0.0073565	0.019655	0.919652	387	3	1.7053
ATP9A	4	0.062687	0.17544	0.976516	3377	3	-6.0025	0.0073601	0.019658	0.919652	388	1	-6.0025
ADGRG3	4	0.87356	0.88936	0.999998	16811	1	1.1201	0.0073604	0.019659	0.919652	389	2	1.1201
CCZ1B	4	0.89694	0.90418	0.999998	17136	1	1.0014	0.0073861	0.019726	0.919652	390	3	1.0014
SPARC	4	0.98195	0.98197	0.999998	18674	0	0.11199	0.0074092	0.019787	0.919652	391	2	0.11199
APCDD1L	4	0.5816	0.73118	0.999998	13705	2	-4.3559	0.0074676	0.019931	0.919652	392	1	-4.3559
MCF2L2	4	0.52271	0.68673	0.999998	12976	1	1.9947	0.0074707	0.019937	0.919652	393	3	1.9947
AQP12A	4	0.8909	0.90013	0.999998	17044	1	-0.85442	0.0075017	0.020018	0.919652	394	2	-0.85442
EFNA1	4	0.66205	0.79348	0.999998	14857	1	1.5893	0.007511	0.020042	0.919652	395	3	1.5893
BTLA	4	0.98796	0.98797	0.999998	18797	0	1.2167	0.007519	0.020058	0.919652	396	3	1.2167
HIST2H4A	4	0.83504	0.86884	0.999998	16393	1	1.6807	0.0075398	0.020106	0.919652	397	3	1.6807
FGL1	4	0.99918	0.99918	0.999998	19072	0	1.1048	0.0075617	0.020163	0.919652	398	3	1.1048
TMBIM4	4	0.66078	0.79248	0.999998	14843	2	-1.5693	0.0075751	0.020197	0.919652	399	1	-1.5693
C19orf33	4	0.82477	0.86392	0.999998	16292	1	-1.4445	0.0076289	0.020316	0.919652	400	1	-1.4445
TMEM232	4	0.9283	0.92892	0.999998	17634	1	1.0716	0.0076465	0.020356	0.919652	401	3	1.0716
PYDC2	4	0.88797	0.8982	0.999998	16992	1	0.22523	0.0076546	0.02037	0.919652	402	3	0.22523
C1orf106	4	0.77659	0.84362	0.999998	15854	1	0.6016	0.0077364	0.02057	0.919652	403	2	0.6016
RNASE2	4	0.29527	0.5119	0.993114	9632	1	-0.52915	0.0077902	0.020712	0.919652	404	1	-0.52915
TPRG1L	4	0.90312	0.90856	0.999998	17233	1	0.46959	0.0078271	0.020798	0.919652	405	2	0.46959
PSME2	4	0.020149	0.064128	0.950916	1264	2	-3.8664	0.0078439	0.020849	0.919652	406	1	-3.8664
AMBN	4	0.26975	0.47915	0.993114	9030	1	1.0235	0.0078651	0.020896	0.919652	407	3	1.0235
NHLRC1	4	0.50313	0.67211	0.999998	12720	1	1.143	0.0078885	0.02096	0.919652	408	2	1.143
PRR18	4	0.9981	0.99809	0.999998	19040	0	1.1746	0.0078924	0.020969	0.919652	409	3	1.1746
SPDYE6	4	0.54303	0.70185	0.999998	13215	2	-4.4352	0.0078977	0.020984	0.919652	410	1	-4.4352
RAB15	4	0.76241	0.83829	0.999998	15750	1	1.2969	0.0078996	0.020988	0.919652	411	3	1.2969
FUNDC1	4	0.9934	0.99343	0.999998	18904	0	1.4722	0.0079103	0.021019	0.919652	412	3	1.4722
HOMER3	3	0.41673	0.57203	0.997342	11496	1	-1.4859	0.0079473	0.017785	0.919652	413	1	-1.4859
IL19	4	0.30771	0.52752	0.994807	9955	2	-1.8006	0.0080007	0.021238	0.919652	414	2	-1.8006
AKAP2	4	0.88797	0.8982	0.999998	17002	1	1.8547	0.0080288	0.021312	0.919652	415	3	1.8547
PLCE1	4	0.906	0.91067	0.999998	17270	1	1.2266	0.0080455	0.021355	0.919652	416	3	1.2266
BTNL8	4	0.98244	0.98246	0.999998	18681	0	1.7553	0.0080588	0.021389	0.919652	417	3	1.7553
ANO7	4	0.65819	0.79042	0.999998	14816	2	-1.8598	0.0080589	0.02139	0.919652	418	2	-1.8598
C17orf89	4	0.046229	0.13479	0.969711	2603	3	-6.3991	0.0080589	0.02139	0.919652	419	1	-6.3991
USP17L20	4	0.49959	0.66946	0.999998	12683	2	-3.0488	0.0080589	0.02139	0.919652	420	1	-3.0488
DEAF1	4	0.99925	0.99926	0.999998	19075	0	1.0185	0.0080612	0.021394	0.919652	421	3	1.0185
PSMB10	3	0.0035981	0.0099489	0.843747	279	2	-7.6963	0.0080683	0.018011	0.919652	422	1	-7.6963
RCN3	4	0.9943	0.99434	0.999998	18942	0	1.06	0.0081143	0.021537	0.919652	423	3	1.06
OSBPL10	4	0.9517	0.95175	0.999998	18083	0	1.2963	0.0081531	0.021634	0.919652	424	3	1.2963
HPN	4	0.78367	0.84645	0.999998	15931	1	0.64931	0.0082102	0.021768	0.919652	425	2	0.64931
ABHD16B	4	0.45951	0.63961	0.998582	12140	2	-4.6816	0.0082201	0.021785	0.919652	426	1	-4.6816
SIX3	4	0.99193	0.99195	0.999998	18872	0	1.2871	0.0082665	0.021906	0.919652	427	3	1.2871
GMFG	4	0.43174	0.61932	0.997342	11723	2	-3.136	0.0082739	0.021928	0.919652	428	1	-3.136
MYEF2	4	0.56713	0.7201	0.999998	13530	1	1.2612	0.0082922	0.021972	0.919652	429	3	1.2612
DSCAML1	4	0.31703	0.53681	0.997125	10126	1	1.3876	0.008318	0.02204	0.919652	430	3	1.3876
CDX2	4	0.96604	0.96609	0.999998	18360	0	1.1493	0.008318	0.02204	0.919652	431	3	1.1493
USP39	3	0.95549	0.95582	0.999998	18163	0	0.23033	0.0083305	0.018461	0.919652	432	1	0.23033
CD200R1L	4	0.67293	0.80206	0.999998	15020	1	1.2629	0.0083377	0.022084	0.919652	433	3	1.2629
PRR36	4	0.66575	0.79636	0.999998	14921	1	1.5804	0.0083532	0.022123	0.919652	434	2	1.5804
CYBRD1	4	0.0079417	0.026836	0.889688	562	2	-2.6768	0.0083589	0.022139	0.919652	435	2	-2.6768
CATIP	4	0.97558	0.97576	0.999998	18553	0	1.035	0.008413	0.022263	0.919652	436	3	1.035
SYBU	4	0.64342	0.77892	0.999998	14620	1	-1.9337	0.008435	0.022318	0.919652	437	1	-1.9337
ORMDL1	4	0.96058	0.96061	0.999998	18260	0	1.3605	0.0084751	0.022424	0.919652	438	3	1.3605
LEPROTL1	4	0.9963	0.99631	0.999998	18997	0	0.95204	0.00848	0.022432	0.919652	439	3	0.95204
DHRS7B	4	0.81105	0.85778	0.999998	16158	1	1.046	0.0085587	0.022633	0.919652	440	3	1.046
OR6V1	4	0.71577	0.82227	0.999998	15397	1	1.2754	0.0085976	0.022739	0.919652	441	3	1.2754
RMI2	4	0.69979	0.81728	0.999998	15315	1	0.96013	0.0086136	0.022776	0.919652	442	2	0.96013
TPCN2	4	0.69443	0.81566	0.999998	15273	1	0.81637	0.0086252	0.022812	0.919652	443	3	0.81637
CCDC150	4	0.98963	0.9896	0.999998	18826	0	1.3325	0.0086328	0.022835	0.919652	444	3	1.3325
CCER2	4	0.92432	0.92541	0.999998	17552	1	1.0464	0.0086353	0.022843	0.919652	445	3	1.0464
GOLGA8R	4	0.65673	0.78934	0.999998	14785	2	-0.99277	0.0086427	0.022855	0.919652	446	2	-0.99277
BOLA3	3	0.76059	0.78465	0.999998	15731	1	2.1463	0.0086609	0.019027	0.919652	447	2	2.1463
GRXCR2	4	0.90011	0.9064	0.999998	17185	1	1.8368	0.0086661	0.022919	0.919652	448	3	1.8368
PFDN4	4	0.9993	0.99931	0.999998	19076	0	0.95241	0.0086845	0.022967	0.919652	449	3	0.95241
RAX2	4	0.93915	0.93923	0.999998	17835	0	-0.75978	0.0087037	0.023017	0.919652	450	1	-0.75978
SLC25A30	3	0.96424	0.96447	0.999998	18332	0	1.0935	0.0087135	0.019119	0.919652	451	2	1.0935
DMTN	4	0.52424	0.68789	0.999998	12981	1	-0.57564	0.0087574	0.023152	0.919652	452	1	-0.57564
MYB	4	0.31811	0.53755	0.997194	10145	1	0.82656	0.0087643	0.023167	0.919652	453	3	0.82656
C2orf50	4	0.92946	0.92993	0.999998	17644	1	1.3672	0.0087834	0.023223	0.919652	454	3	1.3672
TOR1B	4	0.67658	0.80499	0.999998	15050	1	0.45976	0.0088111	0.023288	0.919652	455	2	0.45976
ZBTB6	4	0.13081	0.28403	0.988741	5454	2	-1.8795	0.0088246	0.023326	0.919652	456	2	-1.8795
CD3E	4	0.99359	0.99362	0.999998	18914	0	1.375	0.0088433	0.023366	0.919652	457	3	1.375
MOAP1	4	0.069433	0.18676	0.979074	3568	1	-0.62713	0.0088482	0.023377	0.919652	458	2	-0.62713
KRT18	2	0.46338	0.51756	0.993114	12183	1	-0.29054	0.0088612	0.016817	0.91194	459	1	-0.29054
C5orf66	4	0.22345	0.41752	0.993114	7868	2	-2.3091	0.0088648	0.023426	0.919652	460	1	-2.3091
RNF39	3	0.78003	0.79747	0.999998	15886	1	2.3648	0.0089017	0.019431	0.919652	461	2	2.3648
RAP2B	4	0.99915	0.99914	0.999998	19071	0	1.4833	0.0089615	0.023666	0.919652	462	3	1.4833
PCDH7	4	0.93432	0.93448	0.999998	17760	1	1.3169	0.0089666	0.023682	0.919652	463	3	1.3169
BEND5	4	0.51931	0.68415	0.999998	12941	1	1.4097	0.0089722	0.023697	0.919652	464	2	1.4097
UTY	4	0.74972	0.83371	0.999998	15642	1	1.1932	0.0090054	0.023778	0.919652	465	3	1.1932
NPC1	4	0.26799	0.47688	0.993114	8987	1	0.89	0.0090259	0.023839	0.919652	466	2	0.89
TMEM25	4	0.86392	0.88376	0.999998	16699	1	1.1995	0.0090442	0.023886	0.919652	467	3	1.1995
KCNB1	4	0.24321	0.44414	0.993114	8407	1	0.67963	0.0090589	0.023915	0.919652	468	2	0.67963
RNF7	4	0.9462	0.94623	0.999998	17967	0	-2.3092	0.0090796	0.02397	0.919652	469	1	-2.3092
GANC	4	0.97095	0.97104	0.999998	18465	0	1.1714	0.0091037	0.024026	0.919652	470	2	1.1714
LCE3D	4	0.34175	0.55443	0.997342	10443	1	1.3735	0.0091301	0.024093	0.919652	471	3	1.3735
ADRM1	4	0.44894	0.63176	0.998417	11979	2	-3.9144	0.0091333	0.024106	0.919652	472	1	-3.9144
C8orf82	4	0.52978	0.69196	0.999998	13064	1	0.51558	0.0091396	0.024123	0.919652	473	2	0.51558
ZNF223	4	0.25123	0.45489	0.993114	8576	2	-1.7642	0.0091576	0.024156	0.919652	474	2	-1.7642
RNF126	4	0.39972	0.59606	0.997342	11227	1	-1.5391	0.009187	0.024236	0.919652	475	2	-1.5391
SLC36A2	4	0.44188	0.62669	0.997342	11867	2	-1.175	0.0092057	0.024288	0.919652	476	2	-1.175
TSPO2	4	0.20866	0.39722	0.993114	7498	1	-0.54675	0.0092407	0.02438	0.919652	477	1	-0.54675
SLX1A	3	0.98903	0.98914	0.999998	18812	0	2.3377	0.0092536	0.020046	0.919652	478	2	2.3377
DDHD2	4	0.99503	0.99504	0.999998	18961	0	0.8807	0.0092611	0.024429	0.919652	479	3	0.8807
PGAP2	4	0.945	0.94504	0.999998	17955	0	-0.009042	0.009284	0.024483	0.919652	480	2	-0.009042
HDAC8	4	0.56007	0.71478	0.999998	13439	1	-0.26088	0.0092944	0.024515	0.919652	481	2	-0.26088
ANXA13	4	0.028826	0.088513	0.950916	1715	2	-0.44256	0.0093021	0.024532	0.919652	482	2	-0.44256
STIP1	4	0.97827	0.97843	0.999998	18606	0	1.3397	0.0093082	0.024544	0.919652	483	2	1.3397
CRHBP	3	0.9943	0.99441	0.999998	18943	0	2.0867	0.0093187	0.020162	0.919652	484	2	2.0867
MUM1	4	0.18348	0.36167	0.992673	6821	3	-5.4754	0.0093481	0.02464	0.919652	485	1	-5.4754
TMEM107	4	0.92063	0.92224	0.999998	17505	1	0.3418	0.0093808	0.024731	0.919652	486	2	0.3418
CFAP69	4	0.47775	0.65311	0.999487	12385	1	-1.6827	0.0094018	0.024785	0.919652	487	2	-1.6827
NR1I2	4	0.81105	0.85778	0.999998	16170	1	0.68115	0.00942	0.02483	0.919652	488	3	0.68115
SCRT2	4	0.43063	0.61855	0.997342	11690	1	1.0053	0.0094538	0.024919	0.919652	489	2	1.0053
SCP2D1	4	0.49392	0.66517	0.999998	12589	2	-3.0165	0.0094555	0.024923	0.919652	490	1	-3.0165
CHD9	4	0.9983	0.99829	0.999998	19047	0	0.88068	0.0094814	0.024985	0.919652	491	3	0.88068
DPF1	2	0.8395	0.83932	0.999998	16446	0	0.70086	0.0094936	0.01799	0.919652	492	1	0.70086
SCAMP2	4	0.95086	0.95091	0.999998	18072	0	0.42164	0.0095092	0.025054	0.919652	493	2	0.42164
ZNF705B	4	0.99376	0.99379	0.999998	18920	0	1.1552	0.0095094	0.025055	0.919652	494	3	1.1552
KRT13	4	0.98113	0.98115	0.999998	18660	0	0.88487	0.0095295	0.025104	0.919652	495	3	0.88487
GCSAM	4	0.99418	0.99421	0.999998	18936	0	0.92331	0.0095537	0.025168	0.919652	496	3	0.92331
NEIL2	4	0.47469	0.65083	0.999487	12332	1	0.018442	0.0095628	0.025192	0.919652	497	2	0.018442
BIN2	4	0.95315	0.95322	0.999998	18124	0	0.060414	0.0095821	0.025242	0.919652	498	2	0.060414
FERMT1	4	0.97066	0.97074	0.999998	18461	0	0.82371	0.0096048	0.025293	0.919652	499	3	0.82371
HSD17B7	4	0.080779	0.20551	0.979074	3933	1	0.885	0.0096102	0.025303	0.919652	500	3	0.885
ZMYM6NB	4	0.083593	0.21013	0.979074	4041	2	-3.6115	0.0096165	0.025319	0.919652	501	1	-3.6115
OR10Z1	4	0.59975	0.74515	0.999998	14016	1	-0.082784	0.009625	0.025335	0.919652	502	2	-0.082784
RIMS2	4	0.023367	0.073261	0.950916	1431	1	1.4019	0.0096561	0.025416	0.919652	503	3	1.4019
BBOX1	4	0.24089	0.44106	0.993114	8305	3	-5.424	0.0096702	0.025449	0.919652	504	1	-5.424
PDCD10	4	0.96961	0.96966	0.999998	18441	0	1.0781	0.0096886	0.025494	0.919652	505	3	1.0781
EDN2	4	0.89694	0.90418	0.999998	17152	1	0.92913	0.0097212	0.025587	0.919652	506	3	0.92913
DEGS2	4	0.20241	0.3884	0.993092	7336	2	-1.8124	0.009742	0.025636	0.919652	507	2	-1.8124
HOXB4	4	0.97627	0.97647	0.999998	18568	0	-0.061344	0.0097775	0.025718	0.919652	508	2	-0.061344
UNC13D	4	0.9955	0.99549	0.999998	18978	0	0.93232	0.0098124	0.025802	0.919652	509	3	0.93232
HIST1H4J	4	0.8909	0.90013	0.999998	17061	1	1.5762	0.0098288	0.025844	0.919652	510	3	1.5762
GSTT2B	4	0.76967	0.84101	0.999998	15810	1	1.0964	0.0098466	0.025881	0.919652	511	3	1.0964
PSENEN	4	0.27274	0.48312	0.993114	9118	2	-1.7317	0.0098566	0.025899	0.919652	512	2	-1.7317
BAG5	4	0.54484	0.70324	0.999998	13259	1	-0.12447	0.009858	0.025902	0.919652	513	2	-0.12447
ZNF497	4	0.91326	0.91616	0.999998	17386	1	-0.49696	0.009858	0.025902	0.919652	514	2	-0.49696
CYFIP1	4	0.27492	0.48587	0.993114	9153	2	-1.3111	0.0098783	0.025955	0.919652	515	2	-1.3111
POLD2	2	0.90837	0.90822	0.999998	17306	0	1.2889	0.0098837	0.018714	0.919652	516	1	1.2889
CETN2	4	0.51266	0.67913	0.999998	12868	1	0.35067	0.009897	0.025999	0.919652	517	2	0.35067
MYPN	4	0.99825	0.99824	0.999998	19043	0	0.98129	0.0099083	0.026025	0.919652	518	3	0.98129
DIAPH3	4	0.49581	0.6666	0.999998	12625	1	0.39674	0.0099157	0.026042	0.919652	519	2	0.39674
ADAMTSL4	4	0.25475	0.45953	0.993114	8665	1	1.5837	0.00994	0.026101	0.919652	520	3	1.5837
LINS	4	0.99853	0.9985	0.999998	19057	0	0.93687	0.0099745	0.026181	0.919652	521	3	0.93687
CARHSP1	4	0.99783	0.99783	0.999998	19031	0	0.9281	0.0099841	0.026211	0.919652	522	3	0.9281
TMEM203	4	0.12371	0.2732	0.984237	5271	2	-1.1755	0.0099905	0.026228	0.919652	523	2	-1.1755
DLG2	4	0.073192	0.19301	0.979074	3705	1	0.38753	0.0099922	0.026231	0.919652	524	2	0.38753
PLOD2	4	0.44188	0.62669	0.997342	11860	1	0.44935	0.010009	0.026271	0.919652	525	2	0.44935
LTF	4	0.3224	0.54051	0.997269	10196	1	0.86129	0.010015	0.026286	0.919652	526	3	0.86129
NPTX1	4	0.85437	0.87847	0.999998	16594	1	-3.268	0.010046	0.026363	0.919652	527	1	-3.268
ZNF175	4	0.85741	0.88013	0.999998	16635	1	1.042	0.010053	0.026381	0.919652	528	3	1.042
SYT13	4	0.99912	0.99912	0.999998	19069	0	0.74919	0.0101	0.026491	0.919652	529	2	0.74919
HIST2H3A	3	0.92817	0.92832	0.999998	17630	0	-3.229	0.010124	0.021543	0.919652	530	1	-3.229
OR8B12	4	0.99909	0.99909	0.999998	19068	0	1.1898	0.010133	0.026579	0.919652	531	3	1.1898
KMT2A	4	0.58881	0.73671	0.999998	13808	1	0.98172	0.010148	0.026619	0.919652	532	3	0.98172
IL25	4	0.7516	0.83441	0.999998	15653	1	0.87234	0.010153	0.026632	0.919652	533	2	0.87234
MTRNR2L2	4	0.81105	0.85778	0.999998	16179	1	1.1145	0.010162	0.026654	0.919652	534	3	1.1145
DESI1	4	0.0053152	0.018375	0.86533	398	1	0.79531	0.010182	0.026704	0.919652	535	3	0.79531
NGB	4	0.12708	0.27835	0.985922	5346	1	0.84263	0.010257	0.026895	0.919652	536	3	0.84263
SLC39A2	4	0.59428	0.74092	0.999998	13913	1	-0.33791	0.010261	0.026905	0.919652	537	1	-0.33791
CUL5	4	0.91161	0.91486	0.999998	17347	1	1.2041	0.010285	0.026961	0.919652	538	3	1.2041
C9orf41	4	0.96187	0.96189	0.999998	18294	0	-0.71904	0.010286	0.026962	0.919652	539	2	-0.71904
ERN2	4	0.41745	0.60896	0.997342	11513	1	1.142	0.010291	0.026975	0.919652	540	3	1.142
CLEC16A	4	0.88962	0.89927	0.999998	17034	1	0.71115	0.010297	0.026996	0.919652	541	3	0.71115
ZNF433	4	0.9795	0.97963	0.999998	18631	0	1.0145	0.010299	0.026999	0.919652	542	2	1.0145
ARID3C	4	0.25123	0.45489	0.993114	8595	2	-3.9501	0.010314	0.027037	0.919652	543	1	-3.9501
SMPDL3A	4	0.75898	0.83704	0.999998	15719	1	1.2041	0.010359	0.027162	0.919652	544	3	1.2041
TRIM22	4	0.13707	0.29353	0.991831	5600	2	-2.8058	0.010368	0.027188	0.919652	545	2	-2.8058
CT47A6	3	0.55676	0.67834	0.999998	13422	1	-3.1338	0.010386	0.022002	0.919652	546	1	-3.1338
BCLAF1	3	0.067947	0.15772	0.970602	3527	2	-5.2961	0.010386	0.022002	0.919652	547	1	-5.2961
BOP1	4	0.99327	0.9933	0.999998	18899	0	0.30212	0.010388	0.027244	0.919652	548	3	0.30212
WDR31	4	0.2094	0.3983	0.993114	7505	2	-1.2163	0.010401	0.027283	0.919652	549	2	-1.2163
TMEM190	4	0.39667	0.5939	0.997342	11189	1	0.7451	0.010426	0.027349	0.919652	550	2	0.7451
NEK4	4	0.95843	0.95845	0.999998	18217	0	1.0031	0.010432	0.027361	0.919652	551	3	1.0031
ATP1A3	4	0.92184	0.92329	0.999998	17520	1	1.5785	0.010441	0.027381	0.919652	552	3	1.5785
MRGPRX3	4	0.35177	0.56159	0.997342	10610	1	0.47372	0.010445	0.02739	0.919652	553	2	0.47372
SMTNL2	4	0.81447	0.85926	0.999998	16197	1	-0.033739	0.010475	0.027473	0.919652	554	1	-0.033739
KRTAP5-11	4	0.2622	0.46944	0.993114	8852	1	-0.17129	0.010516	0.027581	0.919652	555	2	-0.17129
C12orf10	4	0.98918	0.98917	0.999998	18817	0	0.82447	0.010528	0.027619	0.919652	556	2	0.82447
DUOX1	4	0.85134	0.87684	0.999998	16569	1	-2.5693	0.010529	0.02762	0.919652	557	1	-2.5693
CDR1	4	0.45808	0.63855	0.998582	12091	1	-0.045033	0.010535	0.027635	0.919652	558	2	-0.045033
FBXO21	4	0.87058	0.88758	0.999998	16787	1	1.2871	0.010548	0.027666	0.919652	559	2	1.2871
TNKS2	4	0.99687	0.9969	0.999998	19010	0	1.5301	0.010575	0.027732	0.919652	560	3	1.5301
GNPAT	4	0.49959	0.66946	0.999998	12709	2	-1.3766	0.010583	0.027747	0.919652	561	2	-1.3766
PPP2R1B	4	0.97289	0.97303	0.999998	18508	0	1.0315	0.010583	0.027747	0.919652	562	2	1.0315
PRDM11	4	0.61231	0.75486	0.999998	14165	1	-1.6692	0.010636	0.027872	0.919652	563	1	-1.6692
KRTAP3-3	4	0.061415	0.1725	0.973112	3310	3	-5.7088	0.01069	0.027992	0.919652	564	1	-5.7088
S100G	4	0.025543	0.079358	0.950916	1546	1	0.91773	0.01069	0.027993	0.919652	565	3	0.91773
DQX1	4	0.34911	0.55967	0.997342	10552	1	0.80442	0.010716	0.028046	0.919652	566	3	0.80442
ARF5	3	0.95702	0.95732	0.999998	18181	0	0.13721	0.010728	0.022602	0.919652	567	1	0.13721
BGLAP	4	0.99891	0.9989	0.999998	19065	0	1.0569	0.01078	0.028209	0.919652	568	3	1.0569
VWCE	4	0.97827	0.97843	0.999998	18601	0	0.75245	0.010792	0.028247	0.919652	569	2	0.75245
NGFR	4	0.34404	0.55605	0.997342	10487	2	-3.3615	0.010797	0.028258	0.919652	570	1	-3.3615
TFAP2B	4	0.2739	0.48459	0.993114	9138	2	-1.3883	0.010818	0.028305	0.919652	571	2	-1.3883
NCK2	4	0.99112	0.99113	0.999998	18854	0	0.86348	0.01082	0.028308	0.919652	572	3	0.86348
MFSD1	4	0.92682	0.92759	0.999998	17611	1	-1.7163	0.010851	0.028376	0.919652	573	1	-1.7163
GLRX2	4	0.45951	0.63961	0.998582	12113	2	-1.405	0.010877	0.028447	0.919652	574	2	-1.405
ING5	4	0.99915	0.99914	0.999998	19070	0	0.91983	0.010892	0.028479	0.919652	575	3	0.91983
HOOK3	4	0.071115	0.18952	0.979074	3626	3	-5.3262	0.010904	0.028511	0.919652	576	1	-5.3262
GOT1L1	4	0.40376	0.59902	0.997342	11293	1	0.94987	0.01094	0.028594	0.919652	577	3	0.94987
ATP5J	4	0.99828	0.99827	0.999998	19045	0	0.98885	0.010949	0.028612	0.919652	578	3	0.98885
SMAD9	4	0.54316	0.70196	0.999998	13253	1	0.78239	0.010962	0.028637	0.919652	579	2	0.78239
EXOSC8	3	0.54237	0.67227	0.999998	13211	1	1.9785	0.011007	0.023099	0.919652	580	2	1.9785
FAM50B	4	0.93915	0.93923	0.999998	17852	0	-0.90357	0.011011	0.02877	0.922379	581	1	-0.90357
HR	4	0.80245	0.85412	0.999998	16087	1	-0.37491	0.011053	0.028879	0.923946	582	2	-0.37491
LIPN	4	0.78019	0.84506	0.999998	15893	1	1.1379	0.011072	0.028916	0.923946	583	3	1.1379
ADGRD1	3	0.69837	0.74721	0.999998	15309	1	2.1379	0.011102	0.023264	0.919652	584	2	2.1379
ZFAT	4	0.906	0.91067	0.999998	17257	1	0.12504	0.011152	0.029122	0.924855	585	2	0.12504
NT5C	4	0.96323	0.96327	0.999998	18307	0	0.12478	0.011172	0.029174	0.924855	586	2	0.12478
PDE4DIP	4	0.96809	0.96815	0.999998	18397	0	-0.35459	0.011181	0.029191	0.924855	587	2	-0.35459
PDCD1	4	0.86917	0.88677	0.999998	16764	1	-2.0719	0.011226	0.029305	0.924855	588	1	-2.0719
BEND4	4	0.98147	0.98148	0.999998	18668	0	-0.031295	0.011277	0.02943	0.924855	589	3	-0.031295
CCDC8	4	0.93674	0.93682	0.999998	17799	1	-1.7431	0.01128	0.029437	0.924855	590	1	-1.7431
NXNL2	3	0.88478	0.88487	0.999998	16956	0	0.42974	0.011292	0.023577	0.919652	591	1	0.42974
ZXDB	4	0.98785	0.98784	0.999998	18793	0	0.68956	0.011297	0.029477	0.924855	592	2	0.68956
ZNF169	4	0.25696	0.46246	0.993114	8708	1	0.84095	0.011303	0.029491	0.924855	593	3	0.84095
ASB5	4	0.42924	0.61758	0.997342	11686	2	-2.5263	0.011333	0.029557	0.924855	594	1	-2.5263
ZFYVE26	4	0.30649	0.52598	0.994807	9912	2	-2.2702	0.011387	0.0297	0.924855	595	2	-2.2702
CLGN	4	0.49299	0.66451	0.999998	12567	1	-0.099162	0.011396	0.029717	0.924855	596	2	-0.099162
CCDC17	4	0.68523	0.81174	0.999998	15218	2	-1.097	0.01141	0.029758	0.924855	597	2	-1.097
ARVCF	4	0.98825	0.98825	0.999998	18804	0	1.1271	0.01143	0.029808	0.924855	598	3	1.1271
CLDN7	4	0.67084	0.8004	0.999998	14974	2	-2.2915	0.01144	0.029834	0.924855	599	1	-2.2915
KLK12	4	0.4453	0.62912	0.998417	11929	1	-0.157	0.01147	0.029903	0.924855	600	2	-0.157
MAGED4B	3	0.93187	0.93197	0.999998	17720	0	-2.9224	0.011493	0.023925	0.919652	601	1	-2.9224
C10orf25	4	0.33503	0.54958	0.997342	10354	1	-0.81414	0.011494	0.029952	0.924855	602	1	-0.81414
PLCB3	4	0.88797	0.8982	0.999998	17016	1	1.1236	0.011502	0.029969	0.924855	603	3	1.1236
WWP1	4	0.21854	0.41088	0.993114	7748	1	1.1151	0.01151	0.029985	0.924855	604	2	1.1151
MYADML2	4	0.34712	0.55825	0.997342	10532	2	-1.7742	0.011516	0.030002	0.924855	605	2	-1.7742
CHST15	4	0.93182	0.93212	0.999998	17684	1	-0.2188	0.011548	0.030086	0.924855	606	2	-0.2188
CLPS	4	0.56152	0.7159	0.999998	13478	2	-1.2983	0.011563	0.030116	0.924855	607	2	-1.2983
CYP3A5	4	0.91161	0.91486	0.999998	17351	1	0.93975	0.011593	0.030203	0.924855	608	3	0.93975
TMEM221	4	0.64342	0.77892	0.999998	14624	1	0.84117	0.011596	0.030212	0.924855	609	3	0.84117
MTCH1	4	0.15787	0.32465	0.992673	6144	3	-4.5164	0.011655	0.030352	0.924855	610	1	-4.5164
ZNF559	4	0.94393	0.94404	0.999998	17943	0	-0.88432	0.011664	0.030374	0.924855	611	2	-0.88432
CAMTA1	3	0.91736	0.91749	0.999998	17465	0	1.9731	0.011666	0.024213	0.919652	612	2	1.9731
OR2Y1	4	0.99933	0.99934	0.999998	19077	0	1.2789	0.011698	0.030466	0.924855	613	3	1.2789
MCM3	4	0.24219	0.44276	0.993114	8387	3	-4.4071	0.011708	0.030487	0.924855	614	1	-4.4071
FAM135B	4	0.072957	0.19262	0.979074	3695	2	-2.3173	0.011711	0.030495	0.924855	615	2	-2.3173
CABP1	3	0.98993	0.99006	0.999998	18836	0	2.0216	0.011773	0.024387	0.919652	616	2	2.0216
CCDC117	4	0.99937	0.99938	0.999998	19079	0	0.88946	0.011789	0.030698	0.924855	617	3	0.88946
ARSH	4	0.87644	0.89106	0.999998	16851	1	0.77329	0.011792	0.030707	0.924855	618	3	0.77329
NUPR1	4	0.38246	0.58353	0.997342	11010	2	-1.4459	0.011812	0.03075	0.924855	619	2	-1.4459
ZNF76	3	0.72551	0.76287	0.999998	15458	1	0.2145	0.011815	0.024458	0.919652	620	1	0.2145
METRNL	4	0.98195	0.98197	0.999998	18669	0	0.97311	0.011815	0.03076	0.924855	621	3	0.97311
STAM	4	0.68047	0.80802	0.999998	15129	1	1.1682	0.011816	0.030762	0.924855	622	2	1.1682
SCARF1	4	0.39378	0.59176	0.997342	11153	2	-1.7056	0.011923	0.031026	0.924855	623	2	-1.7056
SCAF1	4	0.37921	0.5812	0.997342	10954	1	-0.034503	0.011954	0.031111	0.924855	624	2	-0.034503
FGF9	4	0.13708	0.29354	0.991831	5610	1	-0.22882	0.011971	0.03115	0.924855	625	2	-0.22882
CLPSL2	4	0.28744	0.50199	0.993114	9446	2	-2.6266	0.01203	0.031294	0.924855	626	2	-2.6266
F8A2	2	0.58931	0.60911	0.997342	13873	1	-0.57623	0.012061	0.022745	0.919652	627	1	-0.57623
EIF4EBP3	3	0.93954	0.93976	0.999998	17858	0	1.9647	0.012066	0.024884	0.919652	628	2	1.9647
TGM3	4	0.37162	0.57579	0.997342	10855	1	0.49951	0.012077	0.031406	0.924855	629	2	0.49951
TMCO1	4	0.21759	0.40962	0.993114	7730	2	-3.1363	0.012083	0.031422	0.924855	630	1	-3.1363
GHRHR	4	0.87644	0.89106	0.999998	16847	1	0.9611	0.012095	0.031462	0.924855	631	3	0.9611
ZNF589	4	0.83133	0.86707	0.999998	16370	1	-1.4038	0.012137	0.031562	0.924855	632	1	-1.4038
ELOVL7	3	0.8181	0.82507	0.999998	16233	1	1.8907	0.01214	0.025014	0.919652	633	2	1.8907
RSAD2	4	0.26232	0.4696	0.993114	8857	2	-3.6449	0.012191	0.031698	0.924855	634	1	-3.6449
ERP29	4	0.79063	0.84922	0.999998	15990	1	0.3786	0.012193	0.031703	0.924855	635	2	0.3786
ABCF2	4	0.15225	0.31623	0.992673	5992	3	-4.787	0.012244	0.031837	0.924855	636	1	-4.787
SPACA5B	4	0.38246	0.58353	0.997342	11007	1	1.2586	0.012261	0.031874	0.924855	637	3	1.2586
AK2	4	0.94248	0.94257	0.999998	17906	0	-0.15606	0.012276	0.031907	0.924855	638	2	-0.15606
STARD10	4	0.18348	0.36167	0.992673	6818	3	-5.4754	0.012298	0.03196	0.924855	639	1	-5.4754
TNFAIP6	4	0.066509	0.18193	0.979074	3480	1	0.84242	0.012332	0.032043	0.924855	640	3	0.84242
INO80	4	0.67808	0.80617	0.999998	15073	2	-1.0749	0.012345	0.032067	0.924855	641	2	-1.0749
RECQL5	4	0.51931	0.68415	0.999998	12933	1	-0.30521	0.012351	0.032084	0.924855	642	2	-0.30521
SLC26A11	4	0.41166	0.60482	0.997342	11427	1	1.0392	0.012366	0.032117	0.924855	643	3	1.0392
C4orf26	4	0.99606	0.99605	0.999998	18993	0	1.1358	0.012397	0.032188	0.924855	644	3	1.1358
PACSIN1	4	0.09309	0.2255	0.979748	4310	3	-6.1248	0.012405	0.032209	0.924855	645	1	-6.1248
CCDC102A	4	0.54893	0.70629	0.999998	13307	2	-4.356	0.012458	0.03233	0.924855	646	1	-4.356
TMEM184C	4	0.99656	0.9966	0.999998	19003	0	0.79253	0.012469	0.032352	0.924855	647	3	0.79253
KLHL25	4	0.0067954	0.023229	0.86533	501	1	-1.2333	0.012512	0.032455	0.924855	648	1	-1.2333
SMIM24	4	0.8909	0.90013	0.999998	17042	1	1.176	0.012518	0.032473	0.924855	649	3	1.176
PKN3	4	0.94957	0.94962	0.999998	18043	0	0.90121	0.012547	0.032528	0.924855	650	3	0.90121
SLC36A1	4	0.17966	0.35626	0.992673	6734	1	0.715	0.012559	0.032563	0.924855	651	2	0.715
SAMM50	4	0.8182	0.86093	0.999998	16239	1	-3.0281	0.012566	0.032574	0.924855	652	1	-3.0281
OR5V1	4	0.96929	0.96934	0.999998	18430	0	1.0007	0.012576	0.032601	0.924855	653	3	1.0007
DEFA3	4	0.2083	0.39675	0.993114	7482	2	-2.0924	0.012594	0.032645	0.924855	654	2	-2.0924
TGFB1	4	0.86065	0.8819	0.999998	16676	1	1.0968	0.012595	0.032646	0.924855	655	3	1.0968
TMEM201	4	0.59252	0.73961	0.999998	13897	1	-0.72293	0.012608	0.032683	0.924855	656	2	-0.72293
LMF1	4	0.293	0.50902	0.993114	9597	2	-3.1688	0.012619	0.032712	0.924855	657	1	-3.1688
UBXN6	4	0.98757	0.98755	0.999998	18789	0	0.73462	0.012629	0.032733	0.924855	658	2	0.73462
GAR1	4	0.79431	0.85072	0.999998	16017	1	1.27	0.012657	0.032798	0.924855	659	2	1.27
MAN2B1	4	0.92064	0.92224	0.999998	17506	1	-2.0858	0.012673	0.032838	0.924855	660	1	-2.0858
ZBTB21	4	0.081862	0.20733	0.979074	3974	2	-2.4538	0.012678	0.032854	0.924855	661	2	-2.4538
PAM16	4	0.23655	0.43528	0.993114	8198	3	-5.1226	0.012726	0.032973	0.924855	662	1	-5.1226
ALKBH8	4	0.51266	0.67913	0.999998	12858	1	0.024599	0.012751	0.033032	0.924855	663	2	0.024599
ZNF16	4	0.9994	0.99942	0.999998	19082	0	0.94283	0.012759	0.033056	0.924855	664	3	0.94283
C1orf21	4	0.81105	0.85778	0.999998	16160	1	1.151	0.012768	0.033087	0.924855	665	3	1.151
G2E3	4	0.99531	0.99531	0.999998	18973	0	1.3897	0.012783	0.033118	0.924855	666	2	1.3897
CNEP1R1	4	0.16623	0.33693	0.992673	6376	2	-5.3447	0.012833	0.033232	0.924855	667	1	-5.3447
LGALS9	4	0.93915	0.93923	0.999998	17845	0	-0.42127	0.012846	0.033264	0.924855	668	2	-0.42127
SH3GL2	3	0.96133	0.96161	0.999998	18273	0	1.7586	0.01287	0.026248	0.919652	669	2	1.7586
LEF1	4	0.9916	0.99164	0.999998	18864	0	1.2741	0.012883	0.033358	0.924855	670	3	1.2741
SAA2	4	0.89383	0.90205	0.999998	17103	1	1.0049	0.012914	0.033438	0.924855	671	2	1.0049
ADI1	4	0.96711	0.96716	0.999998	18380	0	1.2562	0.012921	0.033455	0.924855	672	3	1.2562
COMMD4	4	0.82313	0.86319	0.999998	16282	1	0.79527	0.012959	0.033545	0.924855	673	2	0.79527
SHC4	4	0.37535	0.57848	0.997342	10909	2	-4.7983	0.012994	0.033636	0.924855	674	1	-4.7983
NYNRIN	4	0.92432	0.92541	0.999998	17575	1	-0.11588	0.013001	0.03366	0.924855	675	2	-0.11588
DUSP23	4	0.95395	0.95397	0.999998	18126	0	0.64323	0.013029	0.033721	0.924855	676	2	0.64323
IFNA21	4	0.049292	0.14254	0.970299	2732	1	1.5571	0.013037	0.033738	0.924855	677	2	1.5571
RPS6KB1	4	0.0085649	0.028831	0.900098	599	3	-6.9629	0.013047	0.033756	0.924855	678	1	-6.9629
PEMT	4	0.97217	0.97232	0.999998	18489	0	-0.45633	0.013072	0.033813	0.924855	679	2	-0.45633
IFIT2	4	0.96693	0.96698	0.999998	18375	0	0.56307	0.013101	0.033879	0.924855	680	3	0.56307
PDPK1	4	0.94848	0.94853	0.999998	18010	0	-2.5123	0.013101	0.033881	0.924855	681	1	-2.5123
WASF3	4	0.99384	0.99388	0.999998	18923	0	0.83265	0.013107	0.033898	0.924855	682	3	0.83265
CSF2	4	0.51586	0.68149	0.999998	12889	1	0.9712	0.013124	0.033927	0.924855	683	3	0.9712
IFNA5	4	0.57038	0.72259	0.999998	13578	1	0.66981	0.013155	0.034	0.924855	684	2	0.66981
LGI4	4	0.99394	0.99398	0.999998	18927	0	0.76604	0.013157	0.034002	0.924855	685	3	0.76604
GLP2R	4	0.99402	0.99407	0.999998	18931	0	0.66776	0.013166	0.034026	0.924855	686	3	0.66776
SOAT1	4	0.95086	0.95091	0.999998	18073	0	-0.14769	0.013208	0.034131	0.925771	687	1	-0.14769
LIN37	4	0.99408	0.99412	0.999998	18933	0	1.1927	0.013218	0.034157	0.925771	688	2	1.1927
ANKRD20A4	4	0.5772	0.72776	0.999998	13668	1	-1.3815	0.013262	0.034277	0.925889	689	1	-1.3815
CARM1	4	0.99887	0.99885	0.999998	19063	0	0.98418	0.013275	0.034307	0.925889	690	3	0.98418
PSTPIP1	4	0.1116	0.25453	0.98229	4894	2	-0.71991	0.013421	0.03466	0.933039	691	2	-0.71991
ITGAE	4	0.034606	0.10437	0.959421	2031	1	-1.1653	0.013583	0.034943	0.933039	692	1	-1.1653
MAGEA4	4	0.97728	0.97748	0.999998	18584	0	0.8539	0.013619	0.034995	0.933039	693	2	0.8539
RAB34	4	0.19604	0.37941	0.992673	7167	2	-2.7059	0.013636	0.035022	0.933039	694	2	-2.7059
CCDC40	4	0.044598	0.13069	0.969711	2527	2	-1.875	0.013645	0.035035	0.933039	695	2	-1.875
CLEC14A	4	0.52516	0.68856	0.999998	13004	2	-1.4697	0.013666	0.035072	0.933039	696	2	-1.4697
ODF3L1	4	0.89383	0.90205	0.999998	17093	1	-0.89492	0.01369	0.035111	0.933039	697	2	-0.89492
UBE2M	3	0.16098	0.30601	0.991831	6243	1	-4.244	0.013765	0.027751	0.919652	698	1	-4.244
C10orf95	4	0.83876	0.87059	0.999998	16431	1	-0.61182	0.013829	0.035335	0.933039	699	2	-0.61182
MS4A10	4	0.91943	0.92119	0.999998	17483	1	-1.4703	0.013904	0.035451	0.933039	700	1	-1.4703
HTR2B	4	0.74122	0.83071	0.999998	15581	1	1.3119	0.013913	0.035467	0.933039	701	2	1.3119
IQCE	4	0.97827	0.97843	0.999998	18604	0	1.1674	0.013975	0.035569	0.933039	702	2	1.1674
DALRD3	3	0.72917	0.76506	0.999998	15487	1	0.34187	0.013986	0.028138	0.919652	703	1	0.34187
PRKAR2B	4	0.22084	0.41395	0.993114	7817	2	-2.0719	0.014008	0.035621	0.933039	704	2	-2.0719
SH3BP5L	4	0.96401	0.96406	0.999998	18327	0	-1.8543	0.014011	0.035627	0.933039	705	1	-1.8543
KIAA1549L	3	0.87945	0.87953	0.999998	16894	0	0.91794	0.014026	0.028205	0.919652	706	2	0.91794
OR2T8	4	0.98977	0.98973	0.999998	18830	0	1.0256	0.014059	0.035704	0.933039	707	2	1.0256
FRMPD1	4	0.6104	0.75338	0.999998	14157	1	1.2017	0.014064	0.035711	0.933039	708	2	1.2017
SZT2	4	0.95969	0.95971	0.999998	18236	0	1.1403	0.014092	0.035759	0.933039	709	2	1.1403
MAP2K5	4	0.14583	0.30666	0.991831	5860	1	1.1037	0.014103	0.035775	0.933039	710	2	1.1037
STYK1	4	0.58473	0.73362	0.999998	13773	1	0.46281	0.014166	0.03587	0.933039	711	2	0.46281
HADHB	3	0.7567	0.78212	0.999998	15699	1	1.9014	0.014189	0.028484	0.919652	712	2	1.9014
NCCRP1	4	0.906	0.91067	0.999998	17261	1	-0.68665	0.014198	0.035921	0.933039	713	2	-0.68665
RPUSD2	4	0.44188	0.62669	0.997342	11868	1	-0.81572	0.014206	0.035928	0.933039	714	2	-0.81572
FAM90A1	4	0.4904	0.66249	0.999998	12549	1	-0.98662	0.014265	0.036035	0.933039	715	2	-0.98662
ALOX12B	4	0.96891	0.96896	0.999998	18419	0	0.55241	0.01431	0.036098	0.933039	716	2	0.55241
STRAP	4	0.84192	0.87209	0.999998	16463	1	-2.5824	0.014332	0.036139	0.933039	717	1	-2.5824
ELL3	4	0.65673	0.78934	0.999998	14770	2	-1.1315	0.014347	0.036159	0.933039	718	2	-1.1315
FAM92B	4	0.95086	0.95091	0.999998	18060	0	0.71602	0.014385	0.03623	0.933039	719	2	0.71602
MYL6B	4	0.39535	0.59294	0.997342	11182	2	-2.8826	0.014439	0.036314	0.933039	720	1	-2.8826
BIN1	4	0.93674	0.93682	0.999998	17808	1	-1.7411	0.014492	0.036402	0.933039	721	2	-1.7411
MT3	4	0.96945	0.9695	0.999998	18436	0	-0.47933	0.014546	0.036498	0.933039	722	1	-0.47933
C1orf115	4	0.98017	0.98026	0.999998	18644	0	1.423	0.014592	0.036566	0.933039	723	2	1.423
MIS18BP1	4	0.055786	0.15889	0.970602	3053	3	-6.1407	0.014626	0.03662	0.933039	724	1	-6.1407
PSPN	4	0.06732	0.18327	0.979074	3515	2	-3.6815	0.014626	0.03662	0.933039	725	1	-3.6815
GABRA1	4	0.91675	0.91898	0.999998	17432	1	1.1369	0.014659	0.036675	0.933039	726	2	1.1369
PTMS	3	0.5604	0.67988	0.999998	13451	1	2.0673	0.014705	0.029404	0.924855	727	2	2.0673
ERMARD	4	0.016737	0.054189	0.945597	1077	2	-3.784	0.014706	0.036755	0.933039	728	1	-3.784
PDE4A	4	0.59894	0.7445	0.999998	13988	2	-0.3824	0.014719	0.036772	0.933039	729	2	-0.3824
PYCR1	4	0.47666	0.65232	0.999487	12355	2	-1.5344	0.014749	0.036815	0.933039	730	2	-1.5344
TEX261	2	0.68395	0.68765	0.999998	15161	1	-0.18437	0.014787	0.027672	0.919652	731	1	-0.18437
CCDC109B	4	0.3704	0.57491	0.997342	10826	2	-3.9739	0.014813	0.036923	0.933039	732	1	-3.9739
MRGPRX4	4	0.98332	0.98333	0.999998	18709	0	1.1419	0.014861	0.037018	0.933039	733	2	1.1419
NRN1L	4	0.18943	0.37017	0.992673	6979	2	-2.0276	0.014867	0.037028	0.933039	734	1	-2.0276
KCNH6	4	0.40246	0.59812	0.997342	11284	2	-2.0544	0.01492	0.037121	0.933039	735	2	-2.0544
DBH	4	0.18791	0.36801	0.992673	6945	2	-2.0554	0.014944	0.037159	0.933039	736	2	-2.0554
LOC401052	4	0.22084	0.41395	0.993114	7831	2	-3.2832	0.014974	0.037209	0.933039	737	1	-3.2832
FBRSL1	4	0.85134	0.87684	0.999998	16555	1	0.83109	0.014997	0.037249	0.933039	738	2	0.83109
KIF1A	4	0.92946	0.92993	0.999998	17664	1	1.1446	0.015042	0.037321	0.933039	739	2	1.1446
AKAP4	4	0.048496	0.14051	0.970299	2700	3	-6.3378	0.01508	0.037378	0.933039	740	1	-6.3378
ZBTB20	3	0.86658	0.86679	0.999998	16725	1	1.6874	0.015105	0.030068	0.924855	741	2	1.6874
HSFX2	4	0.62367	0.76363	0.999998	14324	2	-2.7582	0.015134	0.037461	0.933039	742	1	-2.7582
DUSP5	4	0.030045	0.091922	0.950916	1784	2	-2.4063	0.015141	0.037468	0.933039	743	2	-2.4063
ABCC4	4	0.55314	0.70945	0.999998	13359	1	0.20019	0.015179	0.037515	0.933039	744	2	0.20019
NDUFA6	4	0.059707	0.16835	0.973112	3248	3	-6.3459	0.015187	0.037526	0.933039	745	1	-6.3459
GLB1	4	0.84487	0.87357	0.999998	16495	1	0.14892	0.015201	0.037547	0.933039	746	2	0.14892
OLFM3	4	0.78709	0.84782	0.999998	15964	1	-3.7389	0.015241	0.037609	0.933039	747	1	-3.7389
POPDC3	4	0.38732	0.58705	0.997342	11073	2	-0.37134	0.015255	0.037628	0.933039	748	2	-0.37134
AHNAK2	4	0.99376	0.99379	0.999998	18919	0	0.80844	0.015308	0.037716	0.933039	749	2	0.80844
TRIM37	4	0.97627	0.97647	0.999998	18567	0	-0.02905	0.015319	0.037738	0.933039	750	2	-0.02905
DNAJB1	4	0.97827	0.97843	0.999998	18594	0	-1.3367	0.015374	0.03782	0.933039	751	2	-1.3367
SRA1	4	0.082047	0.20761	0.979074	3991	1	-1.4627	0.015374	0.03782	0.933039	752	2	-1.4627
TMEM129	4	0.11119	0.25389	0.98229	4876	2	-2.3513	0.015423	0.037897	0.933039	753	2	-2.3513
DIAPH1	4	0.49148	0.66333	0.999998	12563	2	-0.39936	0.015438	0.037924	0.933039	754	2	-0.39936
CYP4X1	4	0.089274	0.21936	0.979748	4221	3	-4.9772	0.015455	0.03795	0.933039	755	1	-4.9772
CCNE2	4	0.98017	0.98026	0.999998	18638	0	-0.81942	0.015508	0.038037	0.933039	756	1	-0.81942
CCBL1	4	0.88212	0.89446	0.999998	16930	1	-0.82666	0.015518	0.038053	0.933039	757	2	-0.82666
MTHFD2	4	0.37043	0.57494	0.997342	10846	1	-4.3323	0.015561	0.03812	0.933039	758	1	-4.3323
SUV420H2	4	0.5816	0.73118	0.999998	13723	2	-1.2483	0.015591	0.03817	0.933039	759	2	-1.2483
CATSPER4	4	0.70495	0.81883	0.999998	15342	1	-2.659	0.015615	0.03821	0.933039	760	1	-2.659
PDLIM1	4	0.077938	0.20082	0.979074	3849	2	-2.3138	0.01563	0.038232	0.933039	761	2	-2.3138
FAAH	3	0.7916	0.80558	0.999998	16004	1	-0.66753	0.015632	0.030944	0.924855	762	1	-0.66753
CCDC168	3	0.7493	0.77742	0.999998	15641	1	1.6066	0.015657	0.030985	0.924855	763	2	1.6066
KIAA0408	4	0.66071	0.79243	0.999998	14841	2	0.031045	0.015668	0.038293	0.933039	764	2	0.031045
PWWP2B	4	0.43063	0.61855	0.997342	11693	2	-0.24445	0.015691	0.038338	0.933039	765	2	-0.24445
RBM46	4	0.63611	0.77322	0.999998	14493	1	0.32717	0.015707	0.038366	0.933039	766	2	0.32717
WDR73	4	0.55314	0.70945	0.999998	13358	2	-1.3068	0.015803	0.038512	0.933039	767	2	-1.3068
BTBD10	4	0.48247	0.6566	0.999998	12451	2	-3.6573	0.015829	0.038546	0.933039	768	1	-3.6573
ZGRF1	4	0.19948	0.38427	0.992673	7245	2	-3.0849	0.015882	0.038644	0.933039	769	1	-3.0849
HDLBP	4	0.97827	0.97843	0.999998	18596	0	1.1213	0.015916	0.038694	0.933039	770	2	1.1213
TNFAIP3	4	0.4904	0.66249	0.999998	12543	1	0.61489	0.015935	0.038726	0.933039	771	2	0.61489
AXIN2	4	0.93278	0.93299	0.999998	17726	1	1.0394	0.015947	0.03875	0.933039	772	2	1.0394
ENOX2	4	0.16038	0.32832	0.992673	6227	2	-1.9802	0.015989	0.038823	0.933039	773	1	-1.9802
VWA5A	3	0.3523	0.50678	0.993114	10615	2	-5.1818	0.015993	0.031559	0.924855	774	1	-5.1818
CDIPT	4	0.47666	0.65232	0.999487	12344	2	-4.6221	0.016042	0.038911	0.933039	775	1	-4.6221
SPX	4	0.91161	0.91486	0.999998	17375	1	-0.43382	0.016048	0.038923	0.933039	776	2	-0.43382
FAM229A	4	0.90885	0.91278	0.999998	17308	1	-1.5557	0.016096	0.039002	0.933039	777	1	-1.5557
MED9	4	0.88341	0.89528	0.999998	16944	1	0.75853	0.01611	0.039023	0.933039	778	2	0.75853
GDF2	3	0.26132	0.41269	0.993114	8830	2	-5.5929	0.016113	0.031764	0.924855	779	1	-5.5929
GP6	4	0.34911	0.55967	0.997342	10562	1	0.38757	0.016118	0.039036	0.933039	780	2	0.38757
OR4C15	4	0.33704	0.55106	0.997342	10375	1	0.02645	0.016149	0.039085	0.933039	781	2	0.02645
MTM1	4	0.39972	0.59606	0.997342	11219	2	-1.4616	0.016157	0.039095	0.933039	782	2	-1.4616
COL18A1	4	0.47969	0.65458	0.999998	12408	2	-2.2264	0.016203	0.039168	0.933039	783	1	-2.2264
SPTBN2	4	0.35442	0.56349	0.997342	10627	2	-1.3024	0.016243	0.039229	0.933039	784	2	-1.3024
OR51T1	4	0.59243	0.73954	0.999998	13883	2	-0.40315	0.016251	0.039245	0.933039	785	2	-0.40315
METTL4	4	0.27669	0.48814	0.993114	9221	3	-3.8063	0.016256	0.039259	0.933039	786	1	-3.8063
MYD88	4	0.13708	0.29354	0.991831	5613	1	0.53573	0.016309	0.039347	0.933971	787	1	0.53573
FRYL	4	0.2104	0.39967	0.993114	7557	1	-0.97868	0.016363	0.039428	0.934363	788	1	-0.97868
TAS2R16	3	0.084972	0.19191	0.979074	4079	2	-6.5132	0.016394	0.032263	0.924855	789	1	-6.5132
CCDC114	4	0.6432	0.77874	0.999998	14606	2	-4.0779	0.016416	0.03951	0.934363	790	1	-4.0779
SPI1	4	0.78709	0.84782	0.999998	15955	1	-0.87234	0.01647	0.039601	0.934479	791	1	-0.87234
RNF139	4	0.86065	0.8819	0.999998	16661	1	0.37394	0.016491	0.039628	0.934479	792	2	0.37394
FOXB2	4	0.31811	0.53755	0.997194	10134	2	-1.6189	0.016523	0.039676	0.934479	793	2	-1.6189
ARID5A	4	0.65455	0.78762	0.999998	14746	1	1.5302	0.016542	0.039711	0.934479	794	2	1.5302
RPS20	3	0.90299	0.90306	0.999998	17218	0	-4.0492	0.016554	0.032556	0.924855	795	1	-4.0492
ITGB1BP1	4	0.39972	0.59606	0.997342	11230	2	-1.4518	0.016576	0.039764	0.934572	796	1	-1.4518
PPP3R2	4	0.98142	0.98143	0.999998	18667	0	-0.053695	0.01663	0.03985	0.935455	797	2	-0.053695
BARHL1	4	0.73382	0.82816	0.999998	15534	1	-0.70379	0.016683	0.039929	0.936112	798	2	-0.70379
AURKAIP1	4	0.97827	0.97843	0.999998	18609	0	-1.3463	0.016737	0.040014	0.936112	799	1	-1.3463
PLD2	4	0.92432	0.92541	0.999998	17567	1	1.1235	0.016772	0.04007	0.936112	800	2	1.1235
MRPL42	4	0.15936	0.32687	0.992673	6192	3	-4.666	0.016817	0.040134	0.936112	801	1	-4.666
RBMXL1	4	0.075321	0.1965	0.979074	3768	2	-4.6068	0.016897	0.040244	0.936112	802	1	-4.6068
FDCSP	4	0.56376	0.71757	0.999998	13504	1	0.21326	0.016907	0.04026	0.936112	803	2	0.21326
SCRG1	4	0.93288	0.93309	0.999998	17729	1	0.96633	0.016947	0.040335	0.936112	804	2	0.96633
ANO9	4	0.49959	0.66946	0.999998	12680	2	-3.8444	0.01695	0.040337	0.936112	805	1	-3.8444
SLC30A1	3	0.51067	0.65913	0.999998	12813	1	2.1706	0.017025	0.033333	0.924855	806	2	2.1706
C7orf31	4	0.28023	0.49277	0.993114	9280	2	-2.941	0.017057	0.040506	0.936112	807	1	-2.941
FHOD3	4	0.56376	0.71757	0.999998	13490	2	-3.9044	0.017057	0.040506	0.936112	808	1	-3.9044
OGDHL	4	0.94263	0.94272	0.999998	17908	0	0.50557	0.01716	0.040672	0.936112	809	2	0.50557
IFT22	4	0.20866	0.39722	0.993114	7494	2	-2.3808	0.017164	0.040677	0.936112	810	2	-2.3808
TRIM33	2	0.98282	0.98284	0.999998	18695	0	1.3533	0.017178	0.031881	0.924855	811	2	1.3533
TNNI3	4	0.98982	0.98979	0.999998	18833	0	1.0318	0.017217	0.040758	0.936112	812	2	1.0318
ARMC6	4	0.30149	0.51973	0.993114	9793	2	-0.77702	0.017244	0.040804	0.936112	813	2	-0.77702
RPL9	4	0.60989	0.75298	0.999998	14115	2	-4.329	0.01727	0.040847	0.936112	814	1	-4.329
RBBP8	3	0.52095	0.66337	0.999998	12952	1	-4.4156	0.017316	0.033832	0.924855	815	1	-4.4156
HMG20A	4	0.74122	0.83071	0.999998	15593	1	0.45525	0.017324	0.040935	0.936112	816	2	0.45525
HHLA1	4	0.18506	0.36394	0.992673	6874	2	-1.8124	0.017341	0.040965	0.936112	817	2	-1.8124
USB1	4	0.90312	0.90856	0.999998	17220	1	-2.8794	0.017377	0.041014	0.936112	818	1	-2.8794
SLC18A3	3	0.64072	0.71711	0.999998	14574	1	1.6729	0.017385	0.03394	0.924855	819	2	1.6729
HADHA	4	0.9942	0.99425	0.999998	18937	0	1.2131	0.01743	0.041101	0.936112	820	2	1.2131
TRPM6	4	0.001324	0.0047513	0.773012	115	1	0.40158	0.017454	0.041139	0.936112	821	2	0.40158
GSAP	4	0.53641	0.69683	0.999998	13147	2	-1.6181	0.017462	0.041145	0.936112	822	2	-1.6181
PDE7A	4	0.38499	0.58537	0.997342	11029	2	-1.971	0.017484	0.041175	0.936112	823	2	-1.971
RGMB	4	0.25861	0.46468	0.993114	8744	2	-5.0545	0.017537	0.041251	0.936112	824	1	-5.0545
POGK	3	0.91371	0.9138	0.999998	17393	0	1.5048	0.017561	0.034254	0.925889	825	2	1.5048
PDE8A	4	0.84487	0.87357	0.999998	16492	1	-0.039915	0.017564	0.041295	0.936112	826	2	-0.039915
CASC10	4	0.91436	0.91705	0.999998	17406	1	1.1361	0.017588	0.041332	0.936112	827	2	1.1361
GNAL	4	0.49959	0.66946	0.999998	12700	2	-2.1134	0.01759	0.041335	0.936112	828	2	-2.1134
CWC27	4	0.11119	0.25389	0.98229	4880	2	-5.4898	0.017697	0.041484	0.936112	829	1	-5.4898
GRIN2B	4	0.62982	0.76844	0.999998	14427	2	-1.2387	0.017698	0.041485	0.936112	830	2	-1.2387
GPR135	3	0.92925	0.92937	0.999998	17639	0	1.46	0.017803	0.034677	0.933039	831	2	1.46
VIPR1	4	0.86721	0.88563	0.999998	16734	1	-0.75956	0.017804	0.041646	0.936112	832	1	-0.75956
ACR	3	0.22166	0.37096	0.992673	7837	2	-5.7773	0.017837	0.034735	0.933039	833	1	-5.7773
POU5F1	4	0.47176	0.64863	0.999487	12294	2	-3.4	0.017857	0.041719	0.936112	834	1	-3.4
LATS2	4	0.73382	0.82816	0.999998	15529	1	1.0467	0.017869	0.041732	0.936112	835	2	1.0467
SLC25A4	4	0.95756	0.95758	0.999998	18207	0	0.24363	0.017911	0.041802	0.936112	836	1	0.24363
GBX1	4	0.96809	0.96815	0.999998	18401	0	1.3211	0.01796	0.041876	0.936112	837	2	1.3211
ZNF630	4	0.67658	0.80499	0.999998	15066	1	-1.2106	0.017964	0.041884	0.936112	838	1	-1.2106
SMARCD1	4	0.6271	0.76631	0.999998	14373	2	-1.7871	0.018017	0.041971	0.936112	839	1	-1.7871
LRRN4CL	4	0.97103	0.97113	0.999998	18466	0	1.0546	0.018033	0.041993	0.936112	840	2	1.0546
ZBTB7B	4	0.24089	0.44106	0.993114	8314	2	-3.0686	0.018071	0.042057	0.936112	841	1	-3.0686
DPP9	4	0.9462	0.94623	0.999998	17976	0	-0.2179	0.018087	0.042081	0.936112	842	2	-0.2179
TMEM44	4	0.24739	0.44975	0.993114	8459	1	0.98831	0.018087	0.042081	0.936112	843	2	0.98831
SH3BGRL2	4	0.65103	0.78489	0.999998	14717	1	-0.55648	0.018124	0.042139	0.936112	844	2	-0.55648
NBEA	4	0.59241	0.73952	0.999998	13882	2	-1.6135	0.018231	0.042296	0.936112	845	1	-1.6135
ROM1	4	0.99259	0.99262	0.999998	18883	0	0.74558	0.018273	0.042352	0.936112	846	2	0.74558
ARPC5	4	0.34712	0.55825	0.997342	10534	2	-3.0341	0.018311	0.042417	0.936112	847	1	-3.0341
FAM149A	4	0.82963	0.86622	0.999998	16342	1	1.2724	0.018314	0.042422	0.936112	848	2	1.2724
FERD3L	4	0.59975	0.74515	0.999998	14000	1	-1.1657	0.018322	0.042437	0.936112	849	2	-1.1657
ZNF804B	4	0.041747	0.12329	0.969711	2372	2	-2.1119	0.018347	0.042472	0.936112	850	2	-2.1119
KRTAP4-4	4	0.14347	0.30315	0.991831	5781	2	-3.8886	0.018391	0.042546	0.936112	851	1	-3.8886
ARMCX4	3	0.85572	0.85669	0.999998	16610	1	-0.25901	0.018438	0.035729	0.933039	852	1	-0.25901
OBSCN	4	0.23229	0.4295	0.993114	8109	1	-0.34566	0.018444	0.042627	0.936112	853	2	-0.34566
PHKG2	4	0.059842	0.16869	0.973112	3254	2	-3.027	0.018497	0.042721	0.936112	854	1	-3.027
PAX6	4	0.91943	0.92119	0.999998	17476	1	-0.88488	0.018613	0.042901	0.936112	855	2	-0.88488
RAB6A	4	0.9749	0.97505	0.999998	18542	0	0.80764	0.018671	0.042993	0.936112	856	2	0.80764
RSPH4A	4	0.51847	0.68352	0.999998	12899	2	-1.5173	0.018688	0.043012	0.936112	857	2	-1.5173
FBXO4	4	0.26571	0.47403	0.993114	8960	2	-2.0606	0.018696	0.043019	0.936112	858	2	-2.0606
C11orf71	4	0.25479	0.45958	0.993114	8691	2	-2.1496	0.01871	0.043041	0.936112	859	1	-2.1496
FABP7	3	0.1115	0.24237	0.98229	4889	1	-0.38395	0.018718	0.036226	0.933039	860	1	-0.38395
CCKAR	4	0.85264	0.87753	0.999998	16582	1	1.0812	0.018755	0.043105	0.936112	861	2	1.0812
MMP13	4	0.17944	0.35593	0.992673	6695	3	-5.302	0.018764	0.043118	0.936112	862	1	-5.302
ICAM4	4	0.17731	0.35288	0.992673	6657	1	0.07096	0.018864	0.043268	0.936112	863	2	0.07096
GIPC3	4	0.71919	0.82343	0.999998	15426	1	0.30146	0.018885	0.043305	0.936112	864	2	0.30146
AMZ1	4	0.98369	0.98368	0.999998	18712	0	-2.8332	0.018897	0.04332	0.936112	865	1	-2.8332
ROR2	4	0.48833	0.66094	0.999998	12531	2	-4.2734	0.018897	0.04332	0.936112	866	1	-4.2734
TBX5	4	0.42075	0.61133	0.997342	11565	2	-4.3128	0.018897	0.04332	0.936112	867	1	-4.3128
OCEL1	4	0.6432	0.77874	0.999998	14600	2	-3.904	0.01903	0.043538	0.936112	868	1	-3.904
LCLAT1	4	0.69794	0.81669	0.999998	15297	1	-0.15843	0.019084	0.04362	0.936112	869	1	-0.15843
OR4M2	4	0.86392	0.88376	0.999998	16702	1	-0.84798	0.019137	0.043703	0.936112	870	1	-0.84798
GBP2	3	0.87386	0.87401	0.999998	16831	1	-1.1411	0.019159	0.036986	0.933039	871	1	-1.1411
SLC6A14	4	0.41457	0.60688	0.997342	11456	2	-1.4192	0.019176	0.043755	0.936112	872	2	-1.4192
GNAO1	4	0.17513	0.3498	0.992673	6623	2	-2.1755	0.019243	0.043868	0.936112	873	2	-2.1755
PDIA5	4	0.76967	0.84101	0.999998	15808	1	-1.428	0.019243	0.043868	0.936112	874	1	-1.428
MINA	4	0.96187	0.96189	0.999998	18292	0	-1.2619	0.019297	0.043962	0.936112	875	1	-1.2619
USP7	4	0.81447	0.85926	0.999998	16210	1	-2.4833	0.019403	0.044144	0.936112	876	1	-2.4833
B3GALT5	4	0.52271	0.68673	0.999998	12968	2	-2.8887	0.019457	0.044222	0.936112	877	1	-2.8887
C17orf59	4	0.33928	0.55268	0.997342	10421	1	-0.74613	0.019464	0.044237	0.936112	878	2	-0.74613
LCA5	4	0.014653	0.047819	0.937506	956	1	0.1014	0.019472	0.044247	0.936112	879	2	0.1014
TOR1A	3	0.9589	0.95917	0.999998	18228	0	1.7817	0.019485	0.037515	0.933039	880	2	1.7817
DUT	2	0.96382	0.96393	0.999998	18312	0	2.155	0.019491	0.036043	0.933039	881	1	2.155
GPT	4	0.59604	0.74228	0.999998	13951	2	-4.1874	0.01951	0.044301	0.936112	882	1	-4.1874
LONRF2	4	0.094257	0.22735	0.979748	4372	1	0.83357	0.019515	0.044309	0.936112	883	2	0.83357
LEAP2	4	0.13081	0.28403	0.988741	5450	2	-4.0433	0.019563	0.044374	0.936112	884	1	-4.0433
HCCS	4	0.25082	0.45435	0.993114	8563	2	-0.84622	0.019592	0.044415	0.936112	885	2	-0.84622
CPNE4	4	0.42729	0.61617	0.997342	11656	1	0.50643	0.0196	0.044425	0.936112	886	2	0.50643
PURB	4	0.84812	0.87523	0.999998	16538	1	-0.62817	0.019616	0.044453	0.936112	887	1	-0.62817
OFD1	4	0.66575	0.79636	0.999998	14922	1	1.1207	0.01966	0.044522	0.936112	888	2	1.1207
GNAQ	4	0.99033	0.99033	0.999998	18845	0	0.82471	0.019669	0.044532	0.936112	889	2	0.82471
TNFRSF8	4	0.066122	0.1813	0.979074	3476	2	-2.7845	0.019723	0.044636	0.937259	890	2	-2.7845
RENBP	4	0.312	0.53292	0.996221	10048	2	-5.1506	0.019829	0.044819	0.940067	891	1	-5.1506
NOVA2	4	0.32482	0.54227	0.997269	10208	1	0.50795	0.019883	0.044913	0.941001	892	2	0.50795
SDC2	3	0.96486	0.96506	0.999998	18338	0	1.6856	0.019916	0.038255	0.933039	893	2	1.6856
C5orf46	4	0.27175	0.48183	0.993114	9096	2	-1.3554	0.019989	0.045074	0.941938	894	1	-1.3554
CNIH4	4	0.65455	0.78762	0.999998	14738	1	-0.19702	0.020004	0.045091	0.941938	895	2	-0.19702
HKR1	4	0.50313	0.67211	0.999998	12721	1	-1.3843	0.020042	0.045154	0.941938	896	2	-1.3843
AMZ2	4	0.98076	0.98081	0.999998	18651	0	0.46742	0.020055	0.045175	0.941938	897	2	0.46742
SCOC	4	0.091392	0.22278	0.979748	4261	2	-2.3565	0.020073	0.045204	0.941938	898	2	-2.3565
PSMB5	3	0.33627	0.49037	0.993114	10370	2	-5.2515	0.020079	0.038548	0.933039	899	1	-5.2515
CAV1	4	0.45235	0.63431	0.998417	12008	2	-1.6822	0.020149	0.045336	0.942989	900	2	-1.6822
PTGER3	4	0.13203	0.28587	0.988741	5473	1	0.00060176	0.020176	0.045379	0.942989	901	2	0.00060176
EML3	4	0.083193	0.20947	0.979074	4027	3	-4.7971	0.020202	0.045415	0.942989	902	1	-4.7971
AQP11	4	0.79431	0.85072	0.999998	16019	1	0.16629	0.020271	0.045523	0.942989	903	2	0.16629
PSMD9	4	0.060632	0.1706	0.973112	3282	2	-2.9471	0.020309	0.04558	0.942989	904	2	-2.9471
PAQR3	4	0.20041	0.38563	0.992673	7311	1	0.55858	0.020324	0.0456	0.942989	905	2	0.55858
AKAP12	4	0.8182	0.86093	0.999998	16244	1	-3.8223	0.020362	0.045666	0.943329	906	1	-3.8223
XXYLT1	4	0.48522	0.65869	0.999998	12481	2	-0.67304	0.020519	0.045905	0.947239	907	2	-0.67304
WDR55	2	0.97945	0.9795	0.999998	18630	0	2.1269	0.020552	0.038023	0.933039	908	2	2.1269
UGT2A2	3	0.65203	0.72266	0.999998	14722	1	1.5901	0.020594	0.039465	0.934363	909	2	1.5901
MYOM3	4	0.87356	0.88936	0.999998	16815	1	-1.9552	0.020628	0.046085	0.948911	910	1	-1.9552
DYRK1B	4	0.58086	0.73063	0.999998	13702	1	-0.87569	0.020735	0.046242	0.948964	911	1	-0.87569
TFF1	4	0.96496	0.96501	0.999998	18342	0	-0.39006	0.020841	0.046394	0.948964	912	1	-0.39006
RARB	4	0.50648	0.67454	0.999998	12772	1	1.0271	0.020894	0.04647	0.948964	913	2	1.0271
OR1D2	4	0.61673	0.75828	0.999998	14233	2	-1.5187	0.020918	0.046509	0.948964	914	2	-1.5187
APOL6	4	0.083193	0.20947	0.979074	4026	3	-5.8816	0.020948	0.046555	0.948964	915	1	-5.8816
CARD6	4	0.39667	0.5939	0.997342	11192	1	0.72713	0.020988	0.046613	0.948964	916	2	0.72713
XAF1	4	0.17658	0.35184	0.992673	6649	2	-2.4495	0.021001	0.046634	0.948964	917	1	-2.4495
ERICH1	2	0.97898	0.97903	0.999998	18615	0	1.1413	0.021023	0.038891	0.933039	918	2	1.1413
BTBD9	4	0.63934	0.77572	0.999998	14549	2	-0.40314	0.021028	0.046673	0.948964	919	2	-0.40314
CT47A8	3	0.69457	0.74507	0.999998	15282	1	-1.8411	0.021039	0.040241	0.936112	920	1	-1.8411
PRSS58	4	0.54893	0.70629	0.999998	13298	2	-1.7178	0.021054	0.046711	0.948964	921	2	-1.7178
NMT2	4	0.63236	0.7704	0.999998	14451	1	-0.57486	0.021107	0.046795	0.948964	922	2	-0.57486
SHC1	4	0.51422	0.68028	0.999998	12871	1	-2.5286	0.02116	0.046883	0.948964	923	1	-2.5286
SPRY4	3	0.85572	0.85669	0.999998	16611	1	-2.2455	0.021199	0.040512	0.936112	924	1	-2.2455
HOXB6	4	0.99483	0.99484	0.999998	18954	0	1.0722	0.021209	0.046964	0.948964	925	2	1.0722
A1BG	3	0.45662	0.61185	0.997342	12073	1	1.378	0.021225	0.040552	0.936112	926	2	1.378
REM1	4	0.37335	0.57705	0.997342	10893	2	-1.7784	0.02132	0.047122	0.948964	927	2	-1.7784
TMEM67	4	0.98591	0.98589	0.999998	18756	0	0.55338	0.021324	0.047128	0.948964	928	2	0.55338
PMS2	4	0.0089185	0.029994	0.900098	621	1	0.87449	0.021333	0.047144	0.948964	929	2	0.87449
C1orf110	4	0.97681	0.977	0.999998	18577	0	0.18565	0.021359	0.047184	0.948964	930	2	0.18565
CDH11	4	0.95463	0.95466	0.999998	18142	0	-0.92995	0.021373	0.047204	0.948964	931	1	-0.92995
RUFY3	4	0.91436	0.91705	0.999998	17417	1	0.88661	0.021422	0.047269	0.948964	932	2	0.88661
PBLD	4	0.92682	0.92759	0.999998	17610	1	0.73448	0.021466	0.047348	0.948964	933	2	0.73448
C1orf194	4	0.43891	0.62451	0.997342	11832	1	-1.6462	0.021533	0.047457	0.948964	934	2	-1.6462
NRM	4	0.67658	0.80499	0.999998	15049	1	1.1983	0.021537	0.047462	0.948964	935	2	1.1983
FAM107A	4	0.95636	0.95639	0.999998	18170	0	-2.2383	0.021586	0.047541	0.948964	936	1	-2.2383
CST6	4	0.14138	0.30007	0.991831	5708	2	-2.7522	0.021639	0.047617	0.948964	937	2	-2.7522
SPATA5	4	0.37635	0.57917	0.997342	10928	1	0.16635	0.02164	0.04762	0.948964	938	2	0.16635
BHLHE22	4	0.99486	0.99487	0.999998	18957	0	0.94145	0.021685	0.047698	0.948964	939	2	0.94145
FAM179A	4	0.33262	0.54785	0.997342	10316	2	-4.0369	0.021692	0.047711	0.948964	940	1	-4.0369
S100A16	4	0.73021	0.82697	0.999998	15498	1	1.0735	0.021746	0.047796	0.948964	941	2	1.0735
TFB1M	4	0.70832	0.8199	0.999998	15358	1	-1.146	0.021819	0.047898	0.948964	942	2	-1.146
URAD	4	0.93915	0.93923	0.999998	17839	0	0.30563	0.02185	0.047945	0.948964	943	2	0.30563
SULT1A1	4	0.90168	0.90751	0.999998	17212	1	-0.30807	0.021852	0.047947	0.948964	944	2	-0.30807
KLHL20	4	0.62982	0.76844	0.999998	14434	2	-1.4735	0.021868	0.047968	0.948964	945	2	-1.4735
SLC35G2	4	0.51266	0.67913	0.999998	12857	1	0.92398	0.021886	0.047996	0.948964	946	2	0.92398
B3GNT8	4	0.054487	0.15565	0.970602	2982	2	-2.869	0.021905	0.048031	0.948964	947	1	-2.869
LRAT	4	0.67084	0.8004	0.999998	14962	2	-1.9853	0.021958	0.048112	0.948964	948	1	-1.9853
SSX4B	4	0.099306	0.23525	0.98229	4526	2	-1.3684	0.022057	0.048263	0.948964	949	2	-1.3684
LYN	4	0.55242	0.70888	0.999998	13346	2	-1.3276	0.022065	0.048272	0.948964	950	1	-1.3276
PHRF1	4	0.97527	0.97545	0.999998	18547	0	0.27156	0.022071	0.048284	0.948964	951	2	0.27156
TRAPPC1	4	0.63611	0.77322	0.999998	14494	2	-1.9261	0.022118	0.04836	0.948964	952	1	-1.9261
CNNM4	4	0.92855	0.92914	0.999998	17637	1	0.72478	0.02212	0.048362	0.948964	953	2	0.72478
ARMS2	4	0.84993	0.87615	0.999998	16550	1	-0.5812	0.022165	0.048437	0.948964	954	2	-0.5812
FAM64A	4	0.5331	0.69438	0.999998	13121	1	-1.2386	0.022171	0.048444	0.948964	955	2	-1.2386
NXF2	4	0.39119	0.58988	0.997342	11133	1	-0.77347	0.022201	0.04849	0.948964	956	2	-0.77347
C8orf59	4	0.3873	0.58703	0.997342	11072	2	-1.5534	0.022224	0.048525	0.948964	957	1	-1.5534
MEF2D	4	0.93182	0.93212	0.999998	17702	1	0.1467	0.022229	0.04853	0.948964	958	2	0.1467
ZNF286A	4	0.009187	0.030857	0.900098	637	1	-1.0155	0.022238	0.048542	0.948964	959	2	-1.0155
CNTN6	4	0.056807	0.16137	0.970602	3101	2	-3.3785	0.022277	0.048602	0.948964	960	1	-3.3785
MVB12A	4	0.93432	0.93448	0.999998	17741	1	-1.0325	0.022328	0.048689	0.948964	961	2	-1.0325
SPOPL	4	0.41015	0.60369	0.997342	11391	2	-2.0169	0.02233	0.048693	0.948964	962	2	-2.0169
ZNF615	3	0.6179	0.70594	0.999998	14245	1	1.4072	0.022382	0.042502	0.936112	963	2	1.4072
HERPUD1	4	0.66411	0.79508	0.999998	14878	2	-1.8015	0.022384	0.048769	0.948964	964	2	-1.8015
KRTAP2-4	3	0.36598	0.52075	0.993114	10792	1	-1.6708	0.022398	0.042529	0.936112	965	1	-1.6708
POMP	4	0.52978	0.69196	0.999998	13055	1	0.74153	0.022428	0.048842	0.948964	966	2	0.74153
TCHP	4	0.23103	0.42775	0.993114	8092	3	-5.5275	0.022437	0.04885	0.948964	967	1	-5.5275
NOL9	4	0.66411	0.79508	0.999998	14902	2	-3.9436	0.02249	0.048931	0.948964	968	1	-3.9436
FBXO46	4	0.91675	0.91898	0.999998	17437	1	-0.98972	0.022543	0.049018	0.948964	969	2	-0.98972
CLEC4E	4	0.98753	0.98751	0.999998	18788	0	0.098744	0.022596	0.049105	0.948964	970	2	0.098744
THYN1	4	0.072957	0.19262	0.979074	3691	2	-2.4285	0.022747	0.049337	0.948964	971	2	-2.4285
SRSF5	4	0.92682	0.92759	0.999998	17601	1	1.2623	0.022765	0.049363	0.948964	972	2	1.2623
TRHDE	4	0.18804	0.36821	0.992673	6975	2	-2.3057	0.022809	0.049427	0.948964	973	2	-2.3057
NDUFS8	4	0.17961	0.35618	0.992673	6722	3	-5.5346	0.022809	0.049427	0.948964	974	1	-5.5346
EIF3M	4	0.93182	0.93212	0.999998	17713	1	-0.86398	0.022809	0.049427	0.948964	975	1	-0.86398
R3HCC1L	4	0.90154	0.90742	0.999998	17209	1	0.64837	0.022897	0.049559	0.948964	976	2	0.64837
HIST1H4F	3	0.9859	0.98604	0.999998	18755	0	1.356	0.022911	0.04341	0.936112	977	2	1.356
FBXL6	4	0.92946	0.92993	0.999998	17651	1	0.71919	0.022911	0.049576	0.948964	978	2	0.71919
KRT39	4	0.99263	0.99266	0.999998	18886	0	-0.25732	0.022915	0.049581	0.948964	979	1	-0.25732
NSMAF	4	0.44894	0.63176	0.998417	11982	2	-1.5735	0.02292	0.04959	0.948964	980	2	-1.5735
PLK4	3	0.42577	0.5811	0.997342	11616	2	-4.6741	0.022957	0.043474	0.936112	981	1	-4.6741
TLE3	4	0.37335	0.57705	0.997342	10892	2	-0.29014	0.02303	0.049767	0.948964	982	2	-0.29014
RASGEF1B	4	0.22191	0.41539	0.993114	7849	1	-0.27953	0.023074	0.049832	0.948964	983	1	-0.27953
DCTN2	4	0.39535	0.59294	0.997342	11181	2	-3.8314	0.023128	0.04992	0.948964	984	1	-3.8314
GML	3	0.31803	0.47159	0.993114	10130	1	-1.3768	0.023197	0.043869	0.936112	985	1	-1.3768
KRTAP5-10	4	0.62367	0.76363	0.999998	14332	2	-1.5335	0.023215	0.050065	0.948964	986	2	-1.5335
UPF1	4	0.3562	0.56471	0.997342	10642	2	-2.1471	0.023234	0.050097	0.948964	987	2	-2.1471
ZDHHC9	4	0.83876	0.87059	0.999998	16440	1	-1.2161	0.023288	0.050181	0.948964	988	2	-1.2161
PTK6	3	0.95075	0.95102	0.999998	18051	0	-3.032	0.023316	0.044066	0.936112	989	1	-3.032
MTRNR2L1	2	0.97668	0.97681	0.999998	18576	0	0.67124	0.023317	0.043025	0.936112	990	2	0.67124
CSTF1	3	0.291	0.44352	0.993114	9553	1	1.5199	0.023329	0.044083	0.936112	991	2	1.5199
BNC1	4	0.21438	0.40516	0.993114	7622	2	-2.7588	0.02334	0.050263	0.948964	992	2	-2.7588
SEC24B	4	0.93182	0.93212	0.999998	17712	1	-2.5922	0.023393	0.050344	0.948964	993	1	-2.5922
PRH1	4	0.0095729	0.032097	0.900098	664	2	-2.9268	0.023408	0.050366	0.948964	994	2	-2.9268
SEMA4B	4	0.17658	0.35184	0.992673	6646	2	-2.1226	0.023418	0.050376	0.948964	995	2	-2.1226
PTHLH	3	0.71731	0.758	0.999998	15412	1	-3.824	0.023436	0.044245	0.936112	996	1	-3.824
BACE2	4	0.80593	0.85559	0.999998	16117	1	0.10611	0.023446	0.050423	0.948964	997	2	0.10611
WARS	3	0.97516	0.97533	0.999998	18546	0	1.1553	0.023476	0.044318	0.936112	998	2	1.1553
UGGT1	4	0.83504	0.86884	0.999998	16398	1	0.9313	0.023478	0.050482	0.948964	999	2	0.9313
SIPA1L3	3	0.88621	0.8863	0.999998	16981	0	1.1427	0.02348	0.044327	0.936112	1000	2	1.1427
KIRREL	4	0.9865	0.98645	0.999998	18772	0	0.60876	0.023606	0.05068	0.948964	1001	2	0.60876
BMP8B	4	0.39004	0.58903	0.997342	11114	2	-3.3598	0.023659	0.050765	0.948964	1002	1	-3.3598
GTF2IRD2	4	0.73021	0.82697	0.999998	15494	1	-0.77585	0.023668	0.050784	0.948964	1003	2	-0.77585
CD2AP	4	0.62877	0.76763	0.999998	14381	1	-0.36165	0.023687	0.050813	0.948964	1004	2	-0.36165
DFFA	4	0.05212	0.14966	0.970602	2870	3	-6.5496	0.023765	0.050935	0.948964	1005	1	-6.5496
HHIPL1	4	0.95837	0.95839	0.999998	18216	0	0.057182	0.023799	0.050978	0.948964	1006	2	0.057182
METTL8	4	0.21759	0.40962	0.993114	7726	2	-4.5888	0.023818	0.051004	0.948964	1007	1	-4.5888
TIPRL	4	0.1654	0.33571	0.992673	6361	2	-3.2645	0.023871	0.051094	0.948964	1008	1	-3.2645
PTBP2	4	0.088857	0.21869	0.979748	4199	2	-4.0612	0.02403	0.051347	0.948964	1009	1	-4.0612
CD53	4	0.092231	0.22413	0.979748	4303	2	-2.6876	0.024084	0.051428	0.948964	1010	1	-2.6876
RAC2	4	0.42729	0.61617	0.997342	11665	1	-1.8386	0.024137	0.051509	0.948964	1011	1	-1.8386
CPSF3L	2	0.92578	0.92561	0.999998	17593	0	0.77989	0.024143	0.044494	0.936112	1012	1	0.77989
OR1N2	4	0.13482	0.29013	0.990638	5540	2	-2.3243	0.024154	0.051536	0.948964	1013	2	-2.3243
GFI1B	3	0.15418	0.29871	0.991831	6039	2	-6.1128	0.024154	0.045496	0.942989	1014	1	-6.1128
C4orf22	4	0.62516	0.76483	0.999998	14355	1	-1.1425	0.02419	0.051593	0.948964	1015	1	-1.1425
ZNF558	4	0.96729	0.96733	0.999998	18384	0	-1.0344	0.024243	0.051674	0.948964	1016	1	-1.0344
FAM110C	4	0.41457	0.60688	0.997342	11450	1	-0.73294	0.024267	0.051716	0.948964	1017	2	-0.73294
DNER	4	0.41543	0.60748	0.997342	11466	2	-1.9179	0.024276	0.051729	0.948964	1018	2	-1.9179
ZNF280D	4	0.63236	0.7704	0.999998	14461	1	0.76029	0.024323	0.051796	0.948964	1019	2	0.76029
RASL11A	4	0.34712	0.55825	0.997342	10547	2	-2.0027	0.024349	0.051843	0.948964	1020	2	-2.0027
BHLHA9	4	0.43063	0.61855	0.997342	11691	1	0.1108	0.024399	0.051921	0.948964	1021	2	0.1108
HPS5	4	0.40518	0.60004	0.997342	11316	2	-4.5462	0.024402	0.051926	0.948964	1022	1	-4.5462
LCP1	4	0.78019	0.84506	0.999998	15903	1	0.3023	0.024436	0.051971	0.948964	1023	2	0.3023
NOC2L	3	0.98366	0.9838	0.999998	18711	0	0.20131	0.024474	0.04605	0.948911	1024	1	0.20131
UMAD1	4	0.23396	0.43179	0.993114	8130	2	-5.0693	0.024561	0.052151	0.948964	1025	1	-5.0693
DHRS12	4	0.016483	0.053429	0.944277	1062	3	-6.9055	0.024614	0.052239	0.948964	1026	1	-6.9055
GOLGA6B	4	0.97627	0.97647	0.999998	18565	0	-1.0911	0.024667	0.052324	0.948964	1027	1	-1.0911
ZNF620	4	0.46362	0.6426	0.999487	12189	1	0.050116	0.024682	0.052347	0.948964	1028	2	0.050116
SUPT5H	3	0.81016	0.81895	0.999998	16149	1	-0.85899	0.024713	0.046447	0.948964	1029	1	-0.85899
CSNK1G1	4	0.58881	0.73671	0.999998	13825	1	-0.17435	0.024721	0.052408	0.948964	1030	1	-0.17435
SOX13	4	0.98102	0.98105	0.999998	18658	0	1.0229	0.024749	0.05245	0.948964	1031	2	1.0229
IFNK	4	0.57038	0.72259	0.999998	13582	1	-0.48014	0.024774	0.052492	0.948964	1032	2	-0.48014
KIF21B	4	0.074082	0.19445	0.979074	3739	2	-2.5941	0.024805	0.052544	0.948964	1033	2	-2.5941
NPAS1	4	0.42075	0.61133	0.997342	11573	2	-1.7206	0.024827	0.052572	0.948964	1034	1	-1.7206
GJD3	4	0.033588	0.10164	0.957718	1974	2	-2.7592	0.024834	0.052584	0.948964	1035	2	-2.7592
IGDCC4	4	0.15656	0.32269	0.992673	6106	1	0.070213	0.024863	0.052626	0.948964	1036	2	0.070213
CABP5	4	0.084858	0.21217	0.979074	4078	2	-3.0135	0.024933	0.052748	0.948964	1037	1	-3.0135
FBLN7	4	0.63986	0.77611	0.999998	14566	1	-1.0671	0.024962	0.052796	0.948964	1038	2	-1.0671
CNTLN	4	0.64734	0.78203	0.999998	14663	1	-0.25341	0.024977	0.052816	0.948964	1039	2	-0.25341
NAALADL1	4	0.14583	0.30666	0.991831	5852	2	-2.3821	0.024986	0.052828	0.948964	1040	1	-2.3821
PACS1	4	0.40518	0.60004	0.997342	11313	2	-2.1132	0.025039	0.05291	0.948964	1041	2	-2.1132
MYL12A	4	0.2373	0.43627	0.993114	8245	2	-2.1952	0.025063	0.052938	0.948964	1042	2	-2.1952
GBGT1	4	0.47176	0.64863	0.999487	12312	1	1.0891	0.02512	0.053038	0.948964	1043	2	1.0891
ZNF843	4	0.66931	0.79919	0.999998	14946	1	0.83866	0.025145	0.053078	0.948964	1044	2	0.83866
CPT1B	3	0.6443	0.71885	0.999998	14638	1	1.2677	0.025155	0.047213	0.948964	1045	2	1.2677
FZD10	4	0.67808	0.80617	0.999998	15107	2	-1.3578	0.025158	0.053099	0.948964	1046	2	-1.3578
GPR33	4	0.83504	0.86884	0.999998	16397	1	0.25666	0.025187	0.053143	0.948964	1047	2	0.25666
PITX1	4	0.9462	0.94623	0.999998	17970	0	-0.98318	0.025206	0.053169	0.948964	1048	2	-0.98318
CACNA1C	4	0.95824	0.95826	0.999998	18213	0	0.67268	0.025292	0.053297	0.948964	1049	2	0.67268
OR1E2	4	0.86721	0.88563	0.999998	16729	1	-0.62	0.025304	0.05332	0.948964	1050	1	-0.62
ETS2	4	0.59604	0.74228	0.999998	13969	2	-2.709	0.025357	0.053408	0.948964	1051	1	-2.709
BCL11A	4	0.49299	0.66451	0.999998	12571	1	-0.31399	0.025369	0.05342	0.948964	1052	2	-0.31399
CENPE	4	0.30233	0.52072	0.993114	9801	2	-3.9144	0.02541	0.053484	0.948964	1053	1	-3.9144
GJB5	3	0.16377	0.30912	0.992673	6323	1	-2.9224	0.02547	0.047742	0.948964	1054	1	-2.9224
ZMAT5	4	0.18506	0.36394	0.992673	6880	1	1.2379	0.025494	0.053615	0.948964	1055	2	1.2379
DNAJA3	4	0.45323	0.63496	0.998417	12045	2	-2.9619	0.025516	0.053651	0.948964	1056	1	-2.9619
TSPAN31	4	0.24219	0.44276	0.993114	8337	3	-4.8636	0.025569	0.053728	0.948964	1057	1	-4.8636
SAV1	4	0.9462	0.94623	0.999998	17978	0	0.80712	0.02558	0.053746	0.948964	1058	2	0.80712
TSPY8	4	0.48833	0.66094	0.999998	12520	2	-4.2734	0.025622	0.053802	0.948964	1059	1	-4.2734
ANKIB1	4	0.37335	0.57705	0.997342	10895	1	-0.11715	0.025638	0.053834	0.948964	1060	2	-0.11715
ARID5B	4	0.62367	0.76363	0.999998	14329	2	-1.6855	0.025675	0.053891	0.948964	1061	2	-1.6855
TBX21	4	0.56007	0.71478	0.999998	13448	1	-0.17709	0.025677	0.053892	0.948964	1062	2	-0.17709
EPHX1	4	0.97424	0.97439	0.999998	18524	0	0.45166	0.025686	0.05391	0.948964	1063	2	0.45166
GBAS	4	0.52978	0.69196	0.999998	13062	1	-0.88804	0.025696	0.05392	0.948964	1064	2	-0.88804
BCL2	4	0.67293	0.80206	0.999998	15025	1	-0.61422	0.025783	0.054047	0.948964	1065	2	-0.61422
TTC8	4	0.6144	0.75647	0.999998	14191	2	-1.2046	0.025807	0.054094	0.948964	1066	2	-1.2046
TIMM8A	4	0.1875	0.36743	0.992673	6912	3	-5.6106	0.025834	0.054135	0.948964	1067	1	-5.6106
IL27	4	0.42583	0.61507	0.997342	11619	2	-1.8577	0.025879	0.054195	0.948964	1068	2	-1.8577
ANKRD45	4	0.025543	0.079358	0.950916	1549	2	-3.3673	0.025887	0.05421	0.948964	1069	1	-3.3673
HDAC7	4	0.8182	0.86093	0.999998	16243	1	-3.5246	0.025993	0.054374	0.948964	1070	1	-3.5246
TSC22D3	4	0.97119	0.97131	0.999998	18471	0	0.45847	0.025996	0.054378	0.948964	1071	2	0.45847
MNS1	4	0.58473	0.73362	0.999998	13765	1	1.1053	0.026054	0.054458	0.948964	1072	2	1.1053
DMRTA2	4	0.42049	0.61113	0.997342	11532	2	-4.9228	0.026073	0.054488	0.948964	1073	1	-4.9228
MXRA7	4	0.94393	0.94404	0.999998	17926	0	-3.8035	0.026073	0.054488	0.948964	1074	1	-3.8035
SPATA8	4	0.90885	0.91278	0.999998	17327	1	-0.20682	0.026073	0.054488	0.948964	1075	2	-0.20682
TRPA1	4	0.87644	0.89106	0.999998	16844	1	-1.2137	0.026151	0.054606	0.948964	1076	2	-1.2137
UROC1	4	0.26916	0.47838	0.993114	9000	2	-2.2147	0.026152	0.054608	0.948964	1077	1	-2.2147
NTN5	3	0.31742	0.47099	0.993114	10128	2	-5.3394	0.026188	0.048897	0.948964	1078	1	-5.3394
HNRNPH2	4	0.019037	0.06088	0.949634	1199	3	-6.8657	0.026205	0.054698	0.948964	1079	1	-6.8657
KPNA4	4	0.08627	0.21447	0.979074	4129	3	-6.2859	0.026258	0.054772	0.948964	1080	1	-6.2859
CT45A10	4	0.10159	0.23881	0.98229	4589	1	0.096172	0.026278	0.054802	0.948964	1081	2	0.096172
BRD7	4	0.70158	0.8178	0.999998	15328	1	-0.4887	0.026311	0.05486	0.948964	1082	1	-0.4887
MAP1S	4	0.057646	0.16335	0.972586	3149	1	-0.10239	0.026346	0.054912	0.948964	1083	2	-0.10239
LPXN	4	0.49959	0.66946	0.999998	12689	2	-2.9779	0.026364	0.054943	0.948964	1084	1	-2.9779
TMEM104	4	0.97127	0.97139	0.999998	18473	0	0.55659	0.026414	0.055023	0.948964	1085	2	0.55659
KCNQ2	4	0.56797	0.72072	0.999998	13552	2	-2.5455	0.026417	0.055028	0.948964	1086	1	-2.5455
TCEB3B	4	0.14138	0.30007	0.991831	5714	2	-2.4008	0.026424	0.055035	0.948964	1087	2	-2.4008
ZNF581	3	0.90299	0.90306	0.999998	17219	0	-2.6746	0.026427	0.049302	0.948964	1088	1	-2.6746
DCAF8	4	0.012673	0.041739	0.915671	860	2	-2.0393	0.026463	0.05509	0.948964	1089	2	-2.0393
SYDE1	4	0.15237	0.3164	0.992673	6018	3	-4.0241	0.02647	0.0551	0.948964	1090	1	-4.0241
GP5	4	0.05212	0.14966	0.970602	2872	3	-5.3066	0.026523	0.055168	0.948964	1091	1	-5.3066
NEU1	4	0.52978	0.69196	0.999998	13049	1	-0.96974	0.026537	0.05519	0.948964	1092	2	-0.96974
OR10G7	4	0.79256	0.85001	0.999998	16009	1	-3.7271	0.026576	0.055258	0.948964	1093	1	-3.7271
SLC35C2	4	0.17803	0.35393	0.992673	6669	2	-1.3144	0.02661	0.055311	0.948964	1094	2	-1.3144
RAI1	4	0.98582	0.98578	0.999998	18751	0	0.9117	0.026688	0.055442	0.948964	1095	2	0.9117
TBCCD1	4	0.68131	0.80867	0.999998	15144	2	-0.34935	0.026708	0.055478	0.948964	1096	2	-0.34935
HKDC1	4	0.11384	0.25802	0.98229	4973	2	-4.0713	0.026735	0.055522	0.948964	1097	1	-4.0713
C18orf63	4	0.71577	0.82227	0.999998	15391	1	-0.35934	0.026767	0.055568	0.948964	1098	2	-0.35934
HMGB1	4	0.11455	0.25911	0.98229	4986	2	-2.3444	0.026782	0.055592	0.948964	1099	2	-2.3444
PNLDC1	4	0.88212	0.89446	0.999998	16918	1	-1.7542	0.026788	0.055604	0.948964	1100	1	-1.7542
RAB7A	4	0.8182	0.86093	0.999998	16250	1	-1.4669	0.026841	0.055673	0.948964	1101	2	-1.4669
NUDT15	4	0.73939	0.83006	0.999998	15565	1	-0.40324	0.026865	0.055715	0.948964	1102	2	-0.40324
RBM14-RBM4	4	0.94054	0.94062	0.999998	17870	0	-0.074585	0.026885	0.055752	0.948964	1103	2	-0.074585
FAM63A	4	0.42075	0.61133	0.997342	11576	1	-0.46482	0.026949	0.055863	0.948964	1104	2	-0.46482
NPW	4	0.71204	0.82106	0.999998	15377	1	-1.1722	0.026974	0.055898	0.948964	1105	2	-1.1722
SRPX	4	0.12172	0.27017	0.984237	5194	1	-0.31858	0.027	0.055929	0.948964	1106	1	-0.31858
UVSSA	4	0.18791	0.36801	0.992673	6958	2	-2.2	0.027068	0.05603	0.948964	1107	2	-2.2
NAT16	4	0.56713	0.7201	0.999998	13526	1	0.20126	0.027106	0.056082	0.948964	1108	2	0.20126
NPAS4	3	0.57872	0.68789	0.999998	13684	1	-0.53567	0.027144	0.050494	0.948964	1109	1	-0.53567
TACR3	4	0.41166	0.60482	0.997342	11416	1	-3.2864	0.027159	0.056172	0.948964	1110	1	-3.2864
EYS	3	0.034431	0.085355	0.950916	2017	2	-6.9571	0.027183	0.050571	0.948964	1111	1	-6.9571
GRIN3B	4	0.25282	0.45704	0.993114	8605	1	-1.322	0.027212	0.056256	0.948964	1112	1	-1.322
HSDL2	4	0.85134	0.87684	0.999998	16561	1	-4.2059	0.027265	0.056344	0.948964	1113	1	-4.2059
TICAM2	4	0.91554	0.91802	0.999998	17426	1	1.04	0.027285	0.056373	0.948964	1114	2	1.04
IFITM5	4	0.54893	0.70629	0.999998	13309	2	-3.1093	0.027318	0.056421	0.948964	1115	1	-3.1093
SLC5A12	4	0.45323	0.63496	0.998417	12043	2	-2.7971	0.027371	0.056497	0.948964	1116	1	-2.7971
CATSPERG	3	0.81401	0.82187	0.999998	16191	1	0.27314	0.027422	0.050953	0.948964	1117	1	0.27314
ZNF281	4	0.35154	0.56143	0.997342	10586	2	-4.8085	0.027424	0.056573	0.948964	1118	1	-4.8085
NMNAT2	4	0.60989	0.75298	0.999998	14122	2	-1.8972	0.027477	0.056651	0.948964	1119	2	-1.8972
SLCO1B3	4	0.87644	0.89106	0.999998	16845	1	0.82677	0.027489	0.056679	0.948964	1120	2	0.82677
SLC36A4	4	0.17035	0.3429	0.992673	6472	1	0.37506	0.02753	0.056742	0.948964	1121	2	0.37506
YAF2	4	0.933	0.93321	0.999998	17732	1	0.75831	0.027583	0.056824	0.948964	1122	2	0.75831
EN1	4	0.61673	0.75828	0.999998	14205	2	-4.1425	0.027636	0.056916	0.948964	1123	1	-4.1425
NEFM	3	0.99287	0.993	0.999998	18894	0	1.3468	0.02767	0.051358	0.948964	1124	2	1.3468
RANBP3L	4	0.38246	0.58353	0.997342	11006	1	0.014412	0.027689	0.056996	0.948964	1125	1	0.014412
PCSK5	4	0.78019	0.84506	0.999998	15904	1	-1.866	0.027742	0.057072	0.948964	1126	1	-1.866
WDR90	4	0.40246	0.59812	0.997342	11280	1	-0.93376	0.027773	0.057123	0.948964	1127	2	-0.93376
RAPGEF5	4	0.74459	0.8319	0.999998	15598	1	-0.48902	0.027795	0.057162	0.948964	1128	2	-0.48902
TAF7	4	0.80429	0.8549	0.999998	16099	1	0.74499	0.027798	0.057167	0.948964	1129	2	0.74499
TFG	4	0.1471	0.30856	0.992673	5863	1	0.37404	0.027808	0.057182	0.948964	1130	2	0.37404
EFNA5	4	0.94745	0.94751	0.999998	18002	0	1.0889	0.027838	0.057222	0.948964	1131	2	1.0889
2008-03-01	4	0.22745	0.42294	0.993114	7969	2	-3.2035	0.027847	0.057237	0.948964	1132	1	-3.2035
ZDHHC24	4	0.8909	0.90013	0.999998	17046	1	-0.98037	0.027868	0.057267	0.948964	1133	2	-0.98037
RGSL1	4	0.25696	0.46246	0.993114	8707	1	-1.8429	0.0279	0.057308	0.948964	1134	1	-1.8429
SLC23A1	4	0.63236	0.7704	0.999998	14449	1	-1.174	0.027988	0.057442	0.948964	1135	2	-1.174
PJA1	4	0.67808	0.80617	0.999998	15103	2	-1.1838	0.028058	0.057542	0.948964	1136	2	-1.1838
TMCO6	3	0.96736	0.96755	0.999998	18386	0	1.4642	0.028059	0.051997	0.948964	1137	2	1.4642
SLC25A21	4	0.91809	0.92004	0.999998	17468	1	0.75263	0.028059	0.057543	0.948964	1138	2	0.75263
SPINK14	4	0.094257	0.22735	0.979748	4370	2	-2.6682	0.028112	0.057633	0.948964	1139	1	-2.6682
HS3ST5	4	0.59975	0.74515	0.999998	13999	1	1.1354	0.028154	0.057689	0.948964	1140	2	1.1354
SNX15	4	0.94157	0.94165	0.999998	17891	0	-0.80858	0.028189	0.057737	0.948964	1141	2	-0.80858
SLC35G5	4	0.18791	0.36801	0.992673	6964	2	-1.5305	0.028218	0.057772	0.948964	1142	2	-1.5305
TTC23	4	0.15944	0.32698	0.992673	6221	1	-0.39332	0.028229	0.057785	0.948964	1143	2	-0.39332
ARHGDIG	4	0.12371	0.2732	0.984237	5273	1	-0.94067	0.028249	0.05782	0.948964	1144	2	-0.94067
ABTB2	4	0.86721	0.88563	0.999998	16733	1	0.083491	0.028271	0.057854	0.948964	1145	2	0.083491
RBBP9	4	0.65819	0.79042	0.999998	14798	1	-1.0408	0.028324	0.057933	0.948964	1146	1	-1.0408
HTATSF1	4	0.93182	0.93212	0.999998	17688	1	-0.93861	0.02835	0.057975	0.948964	1147	2	-0.93861
VMAC	4	0.85134	0.87684	0.999998	16558	1	-3.8	0.028377	0.058017	0.948964	1148	1	-3.8
DEFB114	4	0.312	0.53292	0.996221	10045	2	-2.0642	0.02838	0.058024	0.948964	1149	2	-2.0642
GNG2	4	0.27611	0.48739	0.993114	9165	1	0.26111	0.02839	0.05804	0.948964	1150	2	0.26111
BLOC1S6	4	0.99772	0.99773	0.999998	19027	0	0.73562	0.02841	0.058075	0.948964	1151	2	0.73562
FBXL17	4	0.20041	0.38563	0.992673	7306	2	-2.8592	0.02843	0.058101	0.948964	1152	1	-2.8592
AGPS	4	0.06724	0.18314	0.979074	3503	3	-6.2175	0.028483	0.058177	0.948964	1153	1	-6.2175
BAG6	3	0.025291	0.064351	0.950916	1531	2	-5.7929	0.028497	0.052737	0.948964	1154	1	-5.7929
VAV3	4	0.86065	0.8819	0.999998	16675	1	-1.7996	0.028588	0.058339	0.948964	1155	1	-1.7996
PLD4	4	0.38246	0.58353	0.997342	11005	1	-0.26078	0.028623	0.058391	0.948964	1156	2	-0.26078
TMPRSS4	4	0.49392	0.66517	0.999998	12585	2	-1.7295	0.028633	0.058406	0.948964	1157	2	-1.7295
CCR8	4	0.11735	0.26341	0.984237	5066	2	-4.8988	0.028641	0.058423	0.948964	1158	1	-4.8988
RNF2	4	0.58668	0.7351	0.999998	13802	1	-0.72258	0.028747	0.058584	0.948964	1159	1	-0.72258
SLC38A3	4	0.98424	0.98422	0.999998	18723	0	0.21869	0.028764	0.058615	0.948964	1160	2	0.21869
SLC18A2	3	0.99115	0.99125	0.999998	18856	0	1.2516	0.02879	0.053246	0.948964	1161	2	1.2516
PDCD1LG2	4	0.29998	0.51786	0.993114	9780	2	-1.2255	0.0288	0.058679	0.948964	1162	1	-1.2255
PAPD7	4	0.58881	0.73671	0.999998	13810	2	-0.64911	0.028866	0.058779	0.948964	1163	2	-0.64911
PROSER2	4	0.77659	0.84362	0.999998	15874	1	-2.0602	0.028906	0.058842	0.948964	1164	1	-2.0602
DAGLA	4	0.40545	0.60022	0.997342	11342	1	-1.0137	0.028942	0.058897	0.948964	1165	2	-1.0137
ZCCHC14	4	0.98267	0.9827	0.999998	18688	0	0.58051	0.028958	0.05893	0.948964	1166	2	0.58051
SPRED2	4	0.62982	0.76844	0.999998	14439	2	-3.0093	0.028959	0.058934	0.948964	1167	1	-3.0093
TRIM60	4	0.63611	0.77322	0.999998	14490	1	-1.2612	0.029012	0.05901	0.948964	1168	1	-1.2612
PRKD3	4	0.56376	0.71757	0.999998	13501	1	-0.1569	0.029029	0.059035	0.948964	1169	2	-0.1569
MRAP2	4	0.91161	0.91486	0.999998	17365	1	-0.69793	0.029064	0.059086	0.948964	1170	1	-0.69793
PDPR	4	0.79431	0.85072	0.999998	16014	1	0.93896	0.029121	0.059182	0.948964	1171	2	0.93896
FAM98A	4	0.94393	0.94404	0.999998	17945	0	0.65292	0.029197	0.059301	0.948964	1172	2	0.65292
ACTR8	4	0.84054	0.87143	0.999998	16449	1	0.40942	0.029197	0.059301	0.948964	1173	2	0.40942
PPP1R14B	4	0.3224	0.54051	0.997269	10183	1	1.1531	0.029284	0.059436	0.948964	1174	2	1.1531
ANKRD36	3	0.39722	0.55237	0.997342	11210	2	-3.0543	0.029292	0.054072	0.948964	1175	1	-3.0543
DHTKD1	4	0.40545	0.60022	0.997342	11338	1	0.37279	0.029355	0.059552	0.948964	1176	1	0.37279
LEMD1	4	0.041875	0.12362	0.969711	2385	3	-5.8836	0.029355	0.059552	0.948964	1177	1	-5.8836
FADS6	4	0.60695	0.75072	0.999998	14088	1	-2.9475	0.029355	0.059552	0.948964	1178	1	-2.9475
CRLF1	4	0.17178	0.34498	0.992673	6532	1	-1.7072	0.029355	0.059552	0.948964	1179	1	-1.7072
GLA	4	0.56797	0.72072	0.999998	13538	2	-2.582	0.029355	0.059552	0.948964	1180	1	-2.582
GZMB	4	0.35442	0.56349	0.997342	10637	1	-2.0724	0.029355	0.059552	0.948964	1181	1	-2.0724
MEIS2	4	0.54647	0.70449	0.999998	13281	1	-0.20612	0.029366	0.059568	0.948964	1182	2	-0.20612
APOBEC3F	4	0.049393	0.14279	0.970299	2759	2	-2.5803	0.029448	0.059693	0.948964	1183	2	-2.5803
NUDT6	3	0.66353	0.72851	0.999998	14868	1	-0.37197	0.029451	0.054346	0.948964	1184	1	-0.37197
MLNR	3	0.9494	0.94965	0.999998	18038	0	1.3931	0.029545	0.054502	0.948964	1185	2	1.3931
CSE1L	3	0.057266	0.13559	0.969711	3140	2	-5.274	0.02957	0.054537	0.948964	1186	1	-5.274
ACTN2	4	0.49581	0.6666	0.999998	12621	2	-0.54189	0.029571	0.059887	0.948964	1187	2	-0.54189
RIPPLY2	4	0.45323	0.63496	0.998417	12034	2	-3.6024	0.029593	0.059922	0.948964	1188	1	-3.6024
FAM189A2	4	0.37043	0.57494	0.997342	10841	2	-0.85807	0.029746	0.060167	0.948964	1189	2	-0.85807
ANKRD54	4	0.64989	0.78402	0.999998	14685	2	-1.2984	0.029761	0.060197	0.948964	1190	2	-1.2984
PAMR1	4	0.88797	0.8982	0.999998	17008	1	-0.89461	0.029805	0.060275	0.948964	1191	1	-0.89461
SLC22A1	4	0.39972	0.59606	0.997342	11232	2	-2.1316	0.029858	0.060352	0.948964	1192	2	-2.1316
LDOC1L	4	0.62516	0.76483	0.999998	14357	1	0.16802	0.029859	0.060357	0.948964	1193	2	0.16802
PSMB9	4	0.19576	0.37904	0.992673	7153	3	-5.3382	0.02991	0.060433	0.948964	1194	1	-5.3382
GPR151	4	0.59252	0.73961	0.999998	13884	2	-1.9681	0.029963	0.060513	0.948964	1195	1	-1.9681
ELFN2	4	0.40772	0.60187	0.997342	11357	2	-2.4535	0.030016	0.060601	0.948964	1196	1	-2.4535
PNPO	4	0.90011	0.9064	0.999998	17179	1	1.0125	0.03003	0.060627	0.948964	1197	2	1.0125
CEACAM7	4	0.51931	0.68415	0.999998	12948	1	-2.0812	0.030069	0.060689	0.948964	1198	1	-2.0812
PSG3	4	0.76967	0.84101	0.999998	15797	1	0.69828	0.030118	0.060755	0.948964	1199	2	0.69828
ANKRD24	4	0.44235	0.62702	0.997342	11885	2	-1.4595	0.030122	0.060763	0.948964	1200	2	-1.4595
MYOG	4	0.62877	0.76763	0.999998	14388	1	0.32418	0.030128	0.06077	0.948964	1201	2	0.32418
TCTA	4	0.18506	0.36394	0.992673	6886	2	-1.4282	0.030159	0.060816	0.948964	1202	2	-1.4282
GLT8D1	4	0.40034	0.59653	0.997342	11265	2	-4.4286	0.030227	0.060936	0.948964	1203	1	-4.4286
SHROOM3	4	0.69794	0.81669	0.999998	15294	1	0.34997	0.030242	0.060951	0.948964	1204	2	0.34997
LMX1A	4	0.90742	0.91172	0.999998	17302	1	0.045303	0.030263	0.060987	0.948964	1205	2	0.045303
KCTD14	4	0.6368	0.77377	0.999998	14504	2	-1.6438	0.03028	0.061009	0.948964	1206	2	-1.6438
PTCHD4	4	0.34911	0.55967	0.997342	10566	1	-1.0936	0.030294	0.061031	0.948964	1207	2	-1.0936
ANKRD39	4	0.97827	0.97843	0.999998	18607	0	1.0906	0.030325	0.061077	0.948964	1208	2	1.0906
PARP4	3	0.14131	0.28479	0.988741	5707	1	-0.26085	0.030365	0.05585	0.948964	1209	1	-0.26085
NADSYN1	4	0.56152	0.7159	0.999998	13475	2	-1.7195	0.030377	0.061162	0.948964	1210	2	-1.7195
ANKRD32	4	0.86065	0.8819	0.999998	16667	1	0.20086	0.030386	0.06118	0.948964	1211	1	0.20086
CORO6	4	0.044259	0.12984	0.969711	2505	1	0.06197	0.030419	0.061232	0.948964	1212	2	0.06197
ARHGAP19	3	0.65969	0.72654	0.999998	14824	1	1.3638	0.030472	0.056014	0.948964	1213	2	1.3638
ADH7	4	0.33262	0.54785	0.997342	10318	1	0.13075	0.030528	0.061389	0.948964	1214	2	0.13075
SORBS2	4	0.96604	0.96609	0.999998	18359	0	0.2225	0.030528	0.061389	0.948964	1215	2	0.2225
OR8I2	3	0.85218	0.85349	0.999998	16580	1	1.1654	0.030537	0.056116	0.948964	1216	2	1.1654
KLHL35	4	0.9979	0.9979	0.999998	19033	0	0.78909	0.030544	0.061412	0.948964	1217	2	0.78909
ESCO2	4	0.55522	0.71104	0.999998	13383	2	-2.8253	0.030597	0.061503	0.948964	1218	1	-2.8253
EXO5	4	0.59975	0.74515	0.999998	14007	1	0.43051	0.030627	0.061556	0.948964	1219	2	0.43051
PCDHGA1	4	0.0092269	0.030997	0.900098	639	3	-7.0793	0.03065	0.061595	0.948964	1220	1	-7.0793
FBXO3	4	0.63236	0.7704	0.999998	14454	1	0.77297	0.030658	0.061604	0.948964	1221	2	0.77297
YIPF1	4	0.5816	0.73118	0.999998	13714	2	-1.6282	0.030679	0.061639	0.948964	1222	2	-1.6282
CLIC3	4	0.68523	0.81174	0.999998	15204	2	-1.2413	0.0307	0.061677	0.948964	1223	2	-1.2413
NOX5	4	0.28294	0.49627	0.993114	9353	3	-4.8182	0.030703	0.06168	0.948964	1224	1	-4.8182
MEPE	4	0.87058	0.88758	0.999998	16783	1	1.0756	0.030721	0.061701	0.948964	1225	2	1.0756
VANGL1	3	0.95715	0.95745	0.999998	18185	0	1.219	0.03075	0.056467	0.948964	1226	2	1.219
ZNF490	4	0.0060151	0.020702	0.86533	443	3	-5.5978	0.030756	0.06175	0.948964	1227	1	-5.5978
CPS1	4	0.43891	0.62451	0.997342	11840	2	-1.4316	0.030805	0.061816	0.948964	1228	2	-1.4316
ANXA5	4	0.97217	0.97232	0.999998	18492	0	0.80936	0.030836	0.061867	0.948964	1229	2	0.80936
TSPY10	4	0.906	0.91067	0.999998	17272	1	-0.19907	0.030857	0.061897	0.948964	1230	2	-0.19907
APRT	4	0.82801	0.86545	0.999998	16329	1	0.46153	0.030951	0.06206	0.948964	1231	2	0.46153
FSCB	4	0.46591	0.64425	0.999487	12214	2	-2.8797	0.03102	0.062171	0.948964	1232	1	-2.8797
DIRAS1	3	0.97362	0.97377	0.999998	18518	0	1.2161	0.031025	0.056915	0.948964	1233	2	1.2161
SBNO2	4	0.24431	0.44559	0.993114	8414	2	-4.5682	0.031073	0.06225	0.948964	1234	1	-4.5682
HBB	4	0.26975	0.47915	0.993114	9023	1	-1.5877	0.031231	0.062497	0.948964	1235	2	-1.5877
LAMP5	4	0.48285	0.65688	0.999998	12455	1	0.061524	0.031256	0.06254	0.948964	1236	2	0.061524
MUC3A	4	0.906	0.91067	0.999998	17279	1	0.74084	0.031282	0.062573	0.948964	1237	2	0.74084
ZSCAN5B	4	0.99343	0.99347	0.999998	18907	0	0.079088	0.031284	0.062575	0.948964	1238	1	0.079088
ZNF705D	4	0.00089185	0.0032356	0.759845	78	2	-0.74727	0.03133	0.062638	0.948964	1239	2	-0.74727
FGF18	4	0.74798	0.83312	0.999998	15618	1	-1.1005	0.031361	0.062684	0.948964	1240	2	-1.1005
VPS18	4	0.1953	0.37839	0.992673	7126	2	-1.4026	0.031377	0.062706	0.948964	1241	2	-1.4026
PRELID2	4	0.42415	0.61384	0.997342	11604	1	-0.83279	0.031389	0.062724	0.948964	1242	2	-0.83279
KIAA1524	4	0.15593	0.32177	0.992673	6105	3	-5.4817	0.031442	0.062805	0.948964	1243	1	-5.4817
N6AMT2	4	0.95542	0.95546	0.999998	18152	0	-0.91699	0.031495	0.062882	0.948964	1244	1	-0.91699
PPWD1	4	0.87644	0.89106	0.999998	16843	1	-0.049759	0.031509	0.062904	0.948964	1245	2	-0.049759
PPP2R2B	4	0.93056	0.93096	0.999998	17675	1	0.061732	0.03153	0.062939	0.948964	1246	2	0.061732
LST1	4	0.16863	0.34037	0.992673	6442	2	-4.6197	0.031548	0.062971	0.948964	1247	1	-4.6197
SORT1	4	0.023606	0.073938	0.950916	1441	2	-2.2439	0.031562	0.062985	0.948964	1248	2	-2.2439
ZDHHC17	4	0.062137	0.17426	0.975616	3355	1	-0.23616	0.031572	0.063005	0.948964	1249	2	-0.23616
HMGXB4	4	0.13708	0.29354	0.991831	5618	1	-1.9458	0.031601	0.063044	0.948964	1250	1	-1.9458
PAPSS1	3	0.16986	0.31564	0.992673	6462	2	-3.9176	0.031636	0.057928	0.948964	1251	1	-3.9176
TPTE2	4	0.46591	0.64425	0.999487	12205	2	-1.8498	0.031699	0.063179	0.948964	1252	2	-1.8498
IFITM3	4	0.19576	0.37904	0.992673	7162	3	-5.292	0.031706	0.063191	0.948964	1253	1	-5.292
PAPOLA	3	0.36839	0.5232	0.994216	10818	1	-1.1819	0.031715	0.05807	0.948964	1254	1	-1.1819
PIAS4	4	0.89512	0.90295	0.999998	17115	1	-0.7199	0.031759	0.063268	0.948964	1255	1	-0.7199
AKAP7	4	0.96545	0.96549	0.999998	18349	0	0.18559	0.031763	0.063274	0.948964	1256	2	0.18559
ZNF396	4	0.2083	0.39675	0.993114	7488	2	-2.3974	0.031784	0.063301	0.948964	1257	2	-2.3974
BHLHA15	4	0.9841	0.98409	0.999998	18720	0	0.72067	0.031805	0.063332	0.948964	1258	2	0.72067
NXNL1	3	0.90138	0.90148	0.999998	17202	0	1.3145	0.03181	0.058219	0.948964	1259	2	1.3145
GPR176	4	0.78019	0.84506	0.999998	15896	1	-1.1211	0.031812	0.063342	0.948964	1260	1	-1.1211
MTRNR2L5	4	0.94055	0.94063	0.999998	17871	0	-0.38885	0.031837	0.06338	0.948964	1261	2	-0.38885
OR10C1	4	0.52978	0.69196	0.999998	13068	2	-2.1237	0.031864	0.06342	0.948964	1262	2	-2.1237
FAM19A5	4	0.65455	0.78762	0.999998	14745	1	0.28757	0.031917	0.063498	0.949014	1263	2	0.28757
CHD1	4	0.12843	0.28044	0.985922	5371	2	-0.52144	0.031943	0.06353	0.949014	1264	2	-0.52144
PDE4D	4	0.29942	0.51716	0.993114	9755	2	-4.5003	0.03197	0.063572	0.949014	1265	1	-4.5003
CECR5	4	0.23595	0.43447	0.993114	8190	1	-0.89786	0.032023	0.063651	0.949448	1266	1	-0.89786
OXLD1	3	0.306	0.45925	0.993114	9906	1	1.1513	0.032093	0.058689	0.948964	1267	2	1.1513
COLCA1	4	0.84487	0.87357	0.999998	16504	1	-4.1235	0.032128	0.063818	0.950183	1268	1	-4.1235
PRPSAP2	4	0.34911	0.55967	0.997342	10548	1	-0.23563	0.032178	0.063908	0.950183	1269	2	-0.23563
NEK9	4	0.46237	0.64172	0.999487	12165	2	-3.6949	0.032181	0.063911	0.950183	1270	1	-3.6949
RAB33A	4	0.1116	0.25453	0.98229	4891	1	0.26021	0.032194	0.063935	0.950183	1271	2	0.26021
AP1S3	4	0.15547	0.32103	0.992673	6073	2	-2.0271	0.03222	0.063974	0.950183	1272	2	-2.0271
PTGIS	4	0.96745	0.96749	0.999998	18390	0	-1.7805	0.032234	0.063999	0.950183	1273	1	-1.7805
REG3G	4	0.87489	0.89015	0.999998	16834	1	0.54347	0.032287	0.064083	0.950691	1274	2	0.54347
OR5F1	4	0.22515	0.41983	0.993114	7900	1	0.48049	0.032339	0.064168	0.951221	1275	2	0.48049
IGSF8	4	0.025543	0.079358	0.950916	1543	1	0.54462	0.032498	0.064419	0.95302	1276	2	0.54462
DLL1	4	0.50972	0.67695	0.999998	12804	1	0.95562	0.032562	0.064521	0.95302	1277	2	0.95562
SIT1	4	0.57454	0.72569	0.999998	13651	2	-1.8265	0.032603	0.064575	0.95302	1278	2	-1.8265
SNRNP27	4	0.99371	0.99374	0.999998	18918	0	0.50537	0.032627	0.064607	0.95302	1279	2	0.50537
ASPSCR1	4	0.42729	0.61617	0.997342	11673	1	-0.95143	0.032656	0.064654	0.95302	1280	1	-0.95143
MFN1	4	0.039021	0.11611	0.966762	2255	2	-1.9049	0.032691	0.064705	0.95302	1281	2	-1.9049
PDGFRA	4	0.62367	0.76363	0.999998	14309	2	-3.2113	0.032708	0.06473	0.95302	1282	1	-3.2113
RAD1	3	0.89564	0.89574	0.999998	17126	0	1.2551	0.032709	0.059707	0.948964	1283	2	1.2551
PCBD1	4	0.162	0.33071	0.992673	6270	2	-2.1021	0.032734	0.064772	0.95302	1284	2	-2.1021
CISD3	4	0.36501	0.57106	0.997342	10751	2	-4.5749	0.032761	0.064814	0.95302	1285	1	-4.5749
NMRK1	4	0.0084082	0.028318	0.898827	593	1	-0.4152	0.032777	0.064838	0.95302	1286	2	-0.4152
FRZB	4	0.57166	0.72353	0.999998	13596	2	-3.6082	0.032867	0.064968	0.953567	1287	1	-3.6082
ZNF829	3	0.98669	0.98684	0.999998	18773	0	1.0105	0.032878	0.059976	0.948964	1288	2	1.0105
HEG1	4	0.34404	0.55605	0.997342	10480	2	-1.8757	0.032885	0.065003	0.953567	1289	2	-1.8757
ASRGL1	4	0.88797	0.8982	0.999998	16994	1	-0.94289	0.032912	0.065039	0.953567	1290	2	-0.94289
OR4D5	4	0.15225	0.31623	0.992673	5997	1	0.90673	0.03296	0.065117	0.953567	1291	2	0.90673
LILRA6	4	0.45532	0.6365	0.998582	12055	1	0.58066	0.032972	0.065133	0.953567	1292	2	0.58066
DEFB136	4	0.59604	0.74228	0.999998	13985	2	-1.6248	0.033036	0.065227	0.953567	1293	2	-1.6248
ZBED5	4	0.30649	0.52598	0.994807	9918	1	-0.0068572	0.033078	0.065283	0.953567	1294	2	-0.0068572
BMS1	3	0.84502	0.84724	0.999998	16506	1	1.2281	0.033099	0.060356	0.948964	1295	2	1.2281
OR8S1	4	0.36501	0.57106	0.997342	10753	1	-1.1588	0.0331	0.065323	0.953567	1296	2	-1.1588
CYP2A7	4	0.90011	0.9064	0.999998	17192	1	0.88722	0.033122	0.065363	0.953567	1297	2	0.88722
MTERF1	4	0.39972	0.59606	0.997342	11226	1	-3.5406	0.03313	0.065374	0.953567	1298	1	-3.5406
CSNK1D	4	0.33328	0.54831	0.997342	10329	2	-4.8688	0.033183	0.065448	0.953912	1299	1	-4.8688
ARHGAP23	4	0.27068	0.4804	0.993114	9059	3	-4.7837	0.033288	0.065617	0.954177	1300	1	-4.7837
RNF165	4	0.041931	0.12377	0.969711	2389	3	-6.2092	0.033288	0.065617	0.954177	1301	1	-6.2092
C11orf31	3	0.91371	0.9138	0.999998	17396	0	-1.3994	0.033322	0.060709	0.948964	1302	1	-1.3994
LY6K	4	0.23595	0.43447	0.993114	8191	2	-2.1716	0.033349	0.065718	0.954177	1303	2	-2.1716
RNF14	4	0.85134	0.87684	0.999998	16562	1	0.47156	0.033392	0.065782	0.954177	1304	2	0.47156
CCT8L2	4	0.84812	0.87523	0.999998	16537	1	-3.6889	0.033394	0.065784	0.954177	1305	1	-3.6889
VIMP	4	0.78367	0.84645	0.999998	15923	1	-1.4115	0.033436	0.065844	0.954177	1306	2	-1.4115
RIT1	4	0.67658	0.80499	0.999998	15059	1	0.47896	0.033447	0.065865	0.954177	1307	2	0.47896
CD19	4	0.2083	0.39675	0.993114	7471	2	-4.1428	0.033447	0.065866	0.954177	1308	1	-4.1428
SLC18B1	3	0.97851	0.97866	0.999998	18610	0	1.3245	0.033478	0.06097	0.948964	1309	2	1.3245
WDR62	4	0.10458	0.24348	0.98229	4665	2	-4.4968	0.033499	0.065946	0.954245	1310	1	-4.4968
YWHAG	4	0.4904	0.66249	0.999998	12539	2	-4.6829	0.033552	0.066029	0.954245	1311	1	-4.6829
C21orf59	3	0.021259	0.054703	0.945597	1316	1	-1.2282	0.033559	0.061115	0.948964	1312	1	-1.2282
HOXA13	4	0.26571	0.47403	0.993114	8955	2	-4.6583	0.033605	0.066104	0.954245	1313	1	-4.6583
C12orf42	4	0.54316	0.70196	0.999998	13244	1	0.54821	0.033609	0.066109	0.954245	1314	2	0.54821
ARHGEF11	4	0.067074	0.18285	0.979074	3488	2	-3.5791	0.033657	0.066176	0.954245	1315	1	-3.5791
OR52N2	4	0.78709	0.84782	0.999998	15957	1	0.16179	0.033675	0.066205	0.954245	1316	2	0.16179
POC1A	4	0.89383	0.90205	0.999998	17106	1	-0.86117	0.033707	0.066252	0.954245	1317	2	-0.86117
IRF2BP2	3	0.97593	0.97612	0.999998	18558	0	1.2898	0.033732	0.061399	0.948964	1318	2	1.2898
SPACA3	4	0.96401	0.96406	0.999998	18316	0	-1.284	0.033763	0.066341	0.954245	1319	1	-1.284
GALNT7	4	0.13707	0.29353	0.991831	5599	2	-3.3248	0.033868	0.066495	0.954245	1320	1	-3.3248
CXorf65	3	0.3517	0.50617	0.993114	10601	1	0.76944	0.033896	0.061664	0.948964	1321	2	0.76944
IFT43	4	0.92184	0.92329	0.999998	17538	1	0.72486	0.033898	0.066544	0.954245	1322	2	0.72486
IAPP	4	0.42415	0.61384	0.997342	11598	1	-0.33713	0.033921	0.066581	0.954245	1323	2	-0.33713
TMIGD3	4	0.19337	0.37569	0.992673	7091	1	0.94518	0.033931	0.066599	0.954245	1324	2	0.94518
CCL23	4	0.48833	0.66094	0.999998	12529	2	-1.868	0.033958	0.066636	0.954245	1325	2	-1.868
NIPAL2	4	0.46362	0.6426	0.999487	12187	1	0.38867	0.033974	0.066663	0.954245	1326	1	0.38867
TSFM	3	0.86312	0.8635	0.999998	16692	1	1.323	0.033999	0.061841	0.948964	1327	2	1.323
MPND	4	0.059623	0.16816	0.973112	3236	3	-6.2797	0.034026	0.066754	0.954245	1328	1	-6.2797
PCDHGA8	4	0.51847	0.68352	0.999998	12912	2	-1.8573	0.034034	0.066765	0.954245	1329	2	-1.8573
PRAF2	4	0.37043	0.57494	0.997342	10851	1	0.72065	0.034067	0.066812	0.954245	1330	2	0.72065
LOC100505549	4	0.99428	0.99432	0.999998	18939	0	-0.096933	0.034079	0.066831	0.954245	1331	1	-0.096933
APOL4	4	0.99255	0.99258	0.999998	18881	0	1.0218	0.034111	0.066883	0.954245	1332	2	1.0218
CLCN6	4	0.95643	0.95645	0.999998	18173	0	-1.4778	0.034132	0.066919	0.954245	1333	1	-1.4778
MED28	3	0.1755	0.32175	0.992673	6625	2	-4.8639	0.034174	0.062133	0.948964	1334	1	-4.8639
CCDC86	4	0.88507	0.89633	0.999998	16974	1	-0.33498	0.034184	0.067	0.954583	1335	2	-0.33498
CACNA1S	3	0.86847	0.86867	0.999998	16760	1	1.262	0.034186	0.062156	0.948964	1336	2	1.262
CDC20	3	0.63717	0.71535	0.999998	14545	1	1.5781	0.034218	0.062207	0.948964	1337	2	1.5781
HARBI1	4	0.23076	0.42741	0.993114	8035	2	-2.2324	0.034231	0.06707	0.954583	1338	2	-2.2324
TENM4	4	0.86065	0.8819	0.999998	16662	1	-3.9804	0.03429	0.067145	0.954617	1339	1	-3.9804
ZNF445	4	0.85134	0.87684	0.999998	16557	1	-1.1139	0.034341	0.067234	0.955173	1340	2	-1.1139
ZCCHC12	4	0.84812	0.87523	0.999998	16539	1	-2.2127	0.034395	0.067314	0.955596	1341	1	-2.2127
P2RY13	4	0.5816	0.73118	0.999998	13732	2	-0.87514	0.034495	0.067456	0.955732	1342	2	-0.87514
MSS51	4	0.26916	0.47838	0.993114	9008	2	-3.587	0.0345	0.067466	0.955732	1343	1	-3.587
PTCH1	4	0.78709	0.84782	0.999998	15960	1	1.0856	0.034506	0.067473	0.955732	1344	2	1.0856
MBD2	4	0.98933	0.98931	0.999998	18820	0	0.62137	0.034583	0.067586	0.955815	1345	2	0.62137
CLLU1OS	4	0.076652	0.19869	0.979074	3807	3	-6.0536	0.034606	0.067614	0.955815	1346	1	-6.0536
BCO2	4	0.52516	0.68856	0.999998	13010	2	-1.7851	0.034616	0.067629	0.955815	1347	2	-1.7851
PCDHB15	4	0.072957	0.19262	0.979074	3687	3	-5.9919	0.034658	0.067697	0.956068	1348	1	-5.9919
CA14	4	0.32069	0.53935	0.997194	10170	2	-2.1716	0.034759	0.067855	0.956266	1349	2	-2.1716
MED12	3	0.85572	0.85669	0.999998	16614	1	1.066	0.034773	0.06311	0.948964	1350	2	1.066
NXN	4	0.66411	0.79508	0.999998	14911	2	-1.5827	0.034803	0.067928	0.956266	1351	2	-1.5827
C15orf53	4	0.41543	0.60748	0.997342	11487	2	-2.0321	0.034814	0.067944	0.956266	1352	2	-2.0321
TYR	4	0.10284	0.24073	0.98229	4631	3	-4.5069	0.034816	0.067949	0.956266	1353	1	-4.5069
SERPINB9	4	0.5331	0.69438	0.999998	13113	1	0.37967	0.034825	0.067962	0.956266	1354	2	0.37967
SCT	3	0.78003	0.79747	0.999998	15888	1	-0.43017	0.034887	0.063312	0.948964	1355	1	-0.43017
CYB5R1	4	0.89694	0.90418	0.999998	17131	1	0.0055589	0.034922	0.068115	0.957051	1356	2	0.0055589
HSPH1	4	0.13494	0.29033	0.990638	5547	2	-2.3949	0.034925	0.068117	0.957051	1357	2	-2.3949
ZNF710	4	0.15382	0.3186	0.992673	6036	2	-3.6024	0.034974	0.068189	0.957352	1358	1	-3.6024
PMEPA1	4	0.36814	0.5733	0.997342	10816	2	-1.2523	0.035027	0.068269	0.957768	1359	2	-1.2523
FBXL5	4	0.19576	0.37904	0.992673	7152	3	-5.1898	0.035132	0.068434	0.957842	1360	1	-5.1898
HSH2D	4	0.66205	0.79348	0.999998	14863	1	-0.2358	0.035146	0.068463	0.957842	1361	2	-0.2358
EFNB3	4	0.57038	0.72259	0.999998	13574	1	-0.72876	0.035157	0.068479	0.957842	1362	2	-0.72876
VAV1	4	0.48113	0.65561	0.999998	12410	2	-1.8386	0.035237	0.068613	0.957842	1363	1	-1.8386
IGFBP3	4	0.90011	0.9064	0.999998	17196	1	0.62387	0.035268	0.068663	0.957842	1364	2	0.62387
WDR38	4	0.68047	0.80802	0.999998	15133	1	-3.7589	0.03529	0.068698	0.957842	1365	1	-3.7589
MAGEC1	4	0.54987	0.707	0.999998	13331	1	0.78005	0.035301	0.068715	0.957842	1366	2	0.78005
ELMOD2	4	0.62324	0.7633	0.999998	14300	1	0.77939	0.035312	0.068733	0.957842	1367	2	0.77939
NPBWR1	4	0.15787	0.32465	0.992673	6136	1	-3.7747	0.035343	0.068776	0.957842	1368	1	-3.7747
SLC16A12	4	0.37335	0.57705	0.997342	10884	1	-1.1657	0.035395	0.068861	0.957842	1369	1	-1.1657
WDR5	4	0.98849	0.9885	0.999998	18806	0	-0.26636	0.035501	0.069011	0.959024	1370	1	-0.26636
INAFM2	4	0.91161	0.91486	0.999998	17369	1	-3.203	0.035553	0.069098	0.959536	1371	1	-3.203
ESR2	4	0.99366	0.99369	0.999998	18916	0	0.73955	0.035669	0.069254	0.960886	1372	2	0.73955
POLR3G	4	0.44235	0.62702	0.997342	11877	2	-2.5708	0.035711	0.069317	0.960886	1373	1	-2.5708
ARFGEF1	4	0.24437	0.44567	0.993114	8420	2	-2.9544	0.035764	0.069385	0.960886	1374	1	-2.9544
THNSL1	4	0.38246	0.58353	0.997342	11003	1	-2.2137	0.035816	0.069471	0.960886	1375	1	-2.2137
CDY2A	4	0.9965	0.99653	0.999998	19001	0	0.64431	0.03587	0.069547	0.960886	1376	2	0.64431
PLTP	4	0.17361	0.3476	0.992673	6559	2	-2.0843	0.035921	0.069628	0.961308	1377	1	-2.0843
CASP6	4	0.94731	0.94737	0.999998	17999	0	-1.0043	0.036132	0.069935	0.963352	1378	1	-1.0043
MYO16	4	0.7265	0.8258	0.999998	15483	1	0.27015	0.036133	0.069936	0.963352	1379	2	0.27015
PIP4K2A	4	0.63281	0.77073	0.999998	14469	2	-1.1111	0.036184	0.070026	0.963352	1380	1	-1.1111
FAM118B	4	0.094834	0.2283	0.979748	4394	2	-2.68	0.036237	0.070113	0.963352	1381	2	-2.68
NPNT	4	0.64063	0.77674	0.999998	14573	2	-0.65796	0.036307	0.070207	0.963352	1382	2	-0.65796
HEATR4	4	0.36779	0.57304	0.997342	10804	2	-3.3992	0.036342	0.070257	0.963352	1383	1	-3.3992
GAB4	4	0.94848	0.94853	0.999998	18029	0	0.32363	0.036425	0.070391	0.963352	1384	2	0.32363
C1QTNF8	4	0.23076	0.42741	0.993114	8028	2	-2.8955	0.036447	0.070436	0.963352	1385	1	-2.8955
SMG6	4	0.18348	0.36167	0.992673	6828	3	-5.1932	0.0365	0.070522	0.963352	1386	1	-5.1932
CX3CR1	4	0.98298	0.98299	0.999998	18702	0	0.52189	0.036543	0.070588	0.963352	1387	2	0.52189
SIPA1L2	4	0.069971	0.18766	0.979074	3581	2	-1.7627	0.036553	0.070607	0.963352	1388	1	-1.7627
MAPRE3	4	0.29766	0.51493	0.993114	9719	1	-2.1581	0.036605	0.070697	0.963352	1389	1	-2.1581
KLF12	4	0.019976	0.063647	0.950878	1258	3	-6.6773	0.036658	0.070769	0.963352	1390	1	-6.6773
CXorf67	4	0.33778	0.55159	0.997342	10398	2	-3.3273	0.03671	0.07085	0.963352	1391	1	-3.3273
PPIP5K1	4	0.60695	0.75072	0.999998	14094	1	-1.7368	0.036763	0.07094	0.963352	1392	1	-1.7368
ZNF771	3	0.92699	0.92709	0.999998	17626	0	-0.25859	0.036787	0.066428	0.954245	1393	1	-0.25859
CRTC2	4	0.55522	0.71104	0.999998	13408	2	-3.7165	0.036815	0.071013	0.963352	1394	1	-3.7165
ZDBF2	4	0.30771	0.52752	0.994807	9946	2	-2.166	0.036848	0.071073	0.963352	1395	2	-2.166
QTRT1	4	0.54987	0.707	0.999998	13322	2	-4.4672	0.036868	0.071101	0.963352	1396	1	-4.4672
MOB3C	4	0.6368	0.77377	0.999998	14525	2	-1.6234	0.036894	0.07115	0.963352	1397	2	-1.6234
ADAMTSL5	4	0.27669	0.48814	0.993114	9218	3	-5.1764	0.036921	0.071189	0.963352	1398	1	-5.1764
PLA2G1B	4	0.16311	0.33233	0.992673	6314	2	-0.79248	0.03695	0.071231	0.963352	1399	2	-0.79248
PRR12	4	0.18804	0.36821	0.992673	6969	1	0.10446	0.036961	0.071248	0.963352	1400	2	0.10446
C16orf87	4	0.33778	0.55159	0.997342	10402	2	-2.7008	0.036973	0.071269	0.963352	1401	1	-2.7008
TPD52	4	0.011944	0.039485	0.905941	816	3	-6.6383	0.037026	0.071348	0.963352	1402	1	-6.6383
RAB1A	4	0.38852	0.58791	0.997342	11083	1	-1.2799	0.037078	0.071426	0.963352	1403	1	-1.2799
P2RY4	4	0.87516	0.8903	0.999998	16837	1	-0.12275	0.037098	0.07146	0.963352	1404	2	-0.12275
SLC46A2	4	0.96935	0.9694	0.999998	18432	0	0.34665	0.037154	0.071551	0.963352	1405	2	0.34665
DNASE2B	4	0.98467	0.98466	0.999998	18733	0	0.23085	0.037171	0.07158	0.963352	1406	2	0.23085
PCNXL3	4	0.1629	0.33203	0.992673	6287	3	-5.3581	0.037183	0.071592	0.963352	1407	1	-5.3581
MIEF1	3	0.87026	0.87042	0.999998	16767	1	1.2636	0.0372	0.067093	0.954583	1408	2	1.2636
TIFA	4	0.97304	0.97319	0.999998	18512	0	0.54628	0.037245	0.071706	0.963352	1409	2	0.54628
AGTPBP1	4	0.98069	0.98074	0.999998	18650	0	0.2519	0.037279	0.071753	0.963352	1410	2	0.2519
AGAP11	4	0.37921	0.5812	0.997342	10957	1	1.2009	0.037302	0.071783	0.963352	1411	2	1.2009
TSPAN14	4	0.60344	0.74803	0.999998	14070	1	-0.40017	0.037341	0.071843	0.963352	1412	1	-0.40017
PNPLA7	4	0.30341	0.52212	0.993114	9867	2	-4.3793	0.037341	0.071843	0.963352	1413	1	-4.3793
RPL15	4	0.98849	0.9885	0.999998	18807	0	-1.2464	0.037341	0.071843	0.963352	1414	1	-1.2464
FBXO30	4	0.42583	0.61507	0.997342	11635	2	-4.3836	0.037499	0.072075	0.963776	1415	1	-4.3836
FIGN	4	0.7265	0.8258	0.999998	15467	1	0.75397	0.037518	0.072102	0.963776	1416	2	0.75397
TAP2	4	0.023667	0.074112	0.950916	1443	3	-6.4793	0.037551	0.072153	0.963776	1417	1	-6.4793
ZNF423	4	0.35442	0.56349	0.997342	10632	1	-1.0548	0.037604	0.072223	0.963776	1418	1	-1.0548
PTPRA	4	0.36108	0.56819	0.997342	10715	2	-1.8803	0.03765	0.072292	0.963776	1419	2	-1.8803
AGAP2	4	0.31563	0.53579	0.996221	10088	2	-1.3985	0.037707	0.072374	0.963776	1420	2	-1.3985
LXN	4	0.9695	0.96955	0.999998	18438	0	0.68593	0.037724	0.0724	0.963776	1421	2	0.68593
AGA	4	0.93305	0.93325	0.999998	17734	1	-0.46896	0.037781	0.07248	0.963776	1422	2	-0.46896
MIS12	4	0.57038	0.72259	0.999998	13568	1	-1.2445	0.037861	0.072617	0.963776	1423	2	-1.2445
CAPN15	4	0.097959	0.23318	0.982038	4483	3	-5.7601	0.037866	0.072624	0.963776	1424	1	-5.7601
MZT2A	4	0.59604	0.74228	0.999998	13982	2	-2.4684	0.037919	0.0727	0.963776	1425	1	-2.4684
MST1L	4	0.24775	0.45025	0.993114	8469	2	-5.0729	0.037971	0.072776	0.963776	1426	1	-5.0729
CLECL1	4	0.039021	0.11611	0.966762	2258	2	-3.9611	0.038024	0.072852	0.963776	1427	1	-3.9611
PTGR1	4	0.10826	0.24925	0.98229	4787	2	-3.0238	0.038077	0.072922	0.963776	1428	1	-3.0238
MSRB2	4	0.71919	0.82343	0.999998	15432	1	0.6323	0.038113	0.072975	0.963776	1429	2	0.6323
LSM14A	4	0.78019	0.84506	0.999998	15901	1	0.077345	0.038125	0.072997	0.963776	1430	2	0.077345
ZNF81	4	0.51847	0.68352	0.999998	12921	2	-1.813	0.038154	0.073042	0.963776	1431	2	-1.813
CABIN1	4	0.80429	0.8549	0.999998	16098	1	-1.4792	0.038155	0.073044	0.963776	1432	2	-1.4792
HCFC1R1	4	0.2619	0.46905	0.993114	8838	3	-4.0471	0.038155	0.073044	0.963776	1433	1	-4.0471
KRT32	3	0.93755	0.93774	0.999998	17813	0	0.094984	0.03817	0.06873	0.957842	1434	1	0.094984
ZFP91	4	0.011396	0.037807	0.90186	791	2	-2.9703	0.038171	0.07307	0.963776	1435	2	-2.9703
MOK	4	0.71577	0.82227	0.999998	15407	1	-0.2643	0.038234	0.073153	0.963776	1436	1	-0.2643
LKAAEAR1	4	0.30771	0.52752	0.994807	9951	2	-2.249	0.038251	0.07318	0.963776	1437	2	-2.249
TIGD6	3	0.67898	0.7366	0.999998	15124	1	1.1137	0.038258	0.068876	0.957842	1438	2	1.1137
PLEKHD1	4	0.74459	0.8319	0.999998	15610	1	-1.0683	0.038287	0.073229	0.963776	1439	2	-1.0683
MIER2	4	0.80429	0.8549	0.999998	16096	1	0.89141	0.038326	0.073283	0.963776	1440	2	0.89141
PMPCB	4	0.053891	0.15416	0.970602	2957	1	-0.25119	0.038339	0.073302	0.963776	1441	1	-0.25119
LFNG	4	0.013757	0.045047	0.930543	914	2	-2.9209	0.038389	0.073387	0.963776	1442	2	-2.9209
C9orf84	4	0.82801	0.86545	0.999998	16322	1	-1.8319	0.038392	0.07339	0.963776	1443	1	-1.8319
HAVCR2	4	0.64989	0.78402	0.999998	14677	2	-1.6506	0.03847	0.073519	0.963776	1444	2	-1.6506
CYP11A1	4	0.82477	0.86392	0.999998	16300	1	-0.82384	0.038493	0.073554	0.963776	1445	2	-0.82384
ATP6V1G2	4	0.95756	0.95758	0.999998	18197	0	-0.22723	0.038497	0.073561	0.963776	1446	2	-0.22723
NDUFS4	4	0.92826	0.92888	0.999998	17633	1	-0.56858	0.038516	0.073588	0.963776	1447	2	-0.56858
CAPN7	4	0.38852	0.58791	0.997342	11077	1	0.47956	0.038585	0.073699	0.963776	1448	2	0.47956
RPL7	3	0.5692	0.68371	0.999998	13565	1	-3.7617	0.038605	0.069419	0.960886	1449	1	-3.7617
NKX2-4	3	0.78422	0.80035	0.999998	15938	1	-2.0932	0.038644	0.069497	0.960886	1450	1	-2.0932
DIO2	4	0.89882	0.90548	0.999998	17169	1	-2.0437	0.038654	0.073809	0.963776	1451	1	-2.0437
GJA5	4	0.58896	0.73682	0.999998	13860	2	-0.66801	0.038753	0.073962	0.963776	1452	2	-0.66801
AKIRIN1	4	0.97827	0.97843	0.999998	18597	0	-0.50461	0.038759	0.073975	0.963776	1453	2	-0.50461
C1orf112	4	0.049066	0.14195	0.970299	2726	2	-1.5668	0.038909	0.074204	0.963776	1454	2	-1.5668
USP28	4	0.54647	0.70449	0.999998	13286	1	0.20822	0.038917	0.074218	0.963776	1455	1	0.20822
TMBIM6	4	0.80276	0.85425	0.999998	16093	1	-1.2365	0.038969	0.074287	0.963776	1456	2	-1.2365
MTTP	4	0.62982	0.76844	0.999998	14421	2	-1.6967	0.039021	0.07437	0.963776	1457	2	-1.6967
SLA2	4	0.57038	0.72259	0.999998	13573	1	-0.03543	0.039048	0.07441	0.963776	1458	2	-0.03543
ZNF77	4	0.5772	0.72776	0.999998	13662	1	-0.18503	0.039071	0.074447	0.963776	1459	2	-0.18503
CCDC166	4	0.10778	0.24848	0.98229	4777	3	-4.695	0.039126	0.074532	0.963776	1460	1	-4.695
KRT12	4	0.98463	0.98462	0.999998	18732	0	1.1867	0.039164	0.074583	0.963776	1461	2	1.1867
TMEM31	4	0.82801	0.86545	0.999998	16317	1	0.15439	0.039179	0.074602	0.963776	1462	2	0.15439
STARD6	4	0.65819	0.79042	0.999998	14796	1	-1.703	0.039284	0.074765	0.963776	1463	1	-1.703
GNRH1	4	0.36239	0.56914	0.997342	10739	1	0.61044	0.039315	0.074816	0.963776	1464	2	0.61044
CBS	4	0.64989	0.78402	0.999998	14697	2	-0.48647	0.039333	0.074846	0.963776	1465	2	-0.48647
DEGS1	4	0.29948	0.51724	0.993114	9760	3	-3.7183	0.039336	0.074853	0.963776	1466	1	-3.7183
SSUH2	4	0.70832	0.8199	0.999998	15357	1	1.0043	0.039356	0.074877	0.963776	1467	2	1.0043
ICAM2	4	0.25696	0.46246	0.993114	8714	1	0.71562	0.039385	0.07492	0.963776	1468	2	0.71562
LDHAL6B	4	0.52516	0.68856	0.999998	13016	2	-1.8969	0.039389	0.074926	0.963776	1469	2	-1.8969
STAG2	4	0.015603	0.050753	0.937506	1013	3	-6.7774	0.039441	0.075	0.963776	1470	1	-6.7774
KRTAP19-7	4	0.2104	0.39967	0.993114	7554	1	-2.2371	0.039494	0.075091	0.963776	1471	1	-2.2371
ZNF57	4	0.92311	0.92437	0.999998	17545	1	0.54755	0.039537	0.075159	0.963776	1472	2	0.54755
SLC14A2	4	0.53462	0.69547	0.999998	13129	2	-2.8102	0.039546	0.075171	0.963776	1473	1	-2.8102
MFSD5	4	0.21386	0.40445	0.993114	7600	2	-2.0435	0.039619	0.075297	0.963776	1474	2	-2.0435
BMP1	3	0.5604	0.67988	0.999998	13453	1	-0.67652	0.039637	0.071158	0.963352	1475	2	-0.67652
MDN1	3	0.95436	0.95469	0.999998	18134	0	-0.67652	0.039637	0.071158	0.963352	1476	2	-0.67652
TCTEX1D4	3	0.9357	0.93588	0.999998	17786	0	-0.67652	0.039637	0.071158	0.963352	1477	2	-0.67652
ALG11	3	0.19197	0.33958	0.992673	7074	1	-0.67652	0.039637	0.071158	0.963352	1478	2	-0.67652
TESK2	3	0.98671	0.98686	0.999998	18774	0	-0.21384	0.039637	0.071158	0.963352	1479	2	-0.21384
GFPT2	4	0.23396	0.43179	0.993114	8129	2	-3.1565	0.039651	0.075347	0.963776	1480	1	-3.1565
H1F0	4	0.20041	0.38563	0.992673	7314	1	-3.0516	0.039704	0.07543	0.963776	1481	1	-3.0516
CRLF3	4	0.68047	0.80802	0.999998	15127	1	-1.0636	0.039706	0.075433	0.963776	1482	2	-1.0636
GPATCH4	4	0.90133	0.90727	0.999998	17201	1	-0.066382	0.039756	0.075507	0.963776	1483	2	-0.066382
SAP18	4	0.5816	0.73118	0.999998	13741	2	-2.8134	0.039808	0.075593	0.963776	1484	2	-2.8134
IL1RL2	4	0.51266	0.67913	0.999998	12851	1	-0.089698	0.039841	0.075646	0.963776	1485	2	-0.089698
MBOAT7	4	0.22034	0.41325	0.993114	7814	2	-1.9329	0.039861	0.075678	0.963776	1486	2	-1.9329
PNMA1	4	0.71577	0.82227	0.999998	15400	1	0.93676	0.039911	0.075755	0.963776	1487	2	0.93676
MELK	4	0.95009	0.95014	0.999998	18050	0	-0.32381	0.039913	0.075759	0.963776	1488	2	-0.32381
HMSD	4	0.45808	0.63855	0.998582	12089	1	0.28877	0.039958	0.075834	0.963776	1489	2	0.28877
OR2L8	4	0.0030455	0.010763	0.843747	236	3	-7.1985	0.039966	0.075849	0.963776	1490	1	-7.1985
KLF10	4	0.88936	0.8991	0.999998	17029	1	0.38439	0.039981	0.075871	0.963776	1491	2	0.38439
PPL	4	0.85437	0.87847	0.999998	16593	1	-1.1473	0.039993	0.075885	0.963776	1492	2	-1.1473
CXCL9	4	0.9952	0.9952	0.999998	18969	0	0.56458	0.040018	0.075923	0.963776	1493	2	0.56458
HUNK	4	0.24219	0.44276	0.993114	8341	3	-4.9587	0.040123	0.076082	0.963776	1494	1	-4.9587
WASF1	4	0.162	0.33071	0.992673	6269	2	-1.4534	0.040216	0.07621	0.963776	1495	2	-1.4534
XPO6	4	0.60294	0.74765	0.999998	14041	2	-3.6195	0.040228	0.076228	0.963776	1496	1	-3.6195
UBR3	4	0.28024	0.49279	0.993114	9284	3	-3.5287	0.040385	0.076451	0.963776	1497	1	-3.5287
HS3ST6	4	0.84631	0.87432	0.999998	16508	1	0.33887	0.040439	0.076533	0.963776	1498	2	0.33887
GPRC5D	4	0.56427	0.71793	0.999998	13512	2	-0.76948	0.040451	0.076556	0.963776	1499	2	-0.76948
LIF	4	0.055291	0.15766	0.970602	3037	2	-3.4949	0.04049	0.076619	0.963776	1500	1	-3.4949
NXPH3	4	0.31622	0.53622	0.996221	10098	2	-4.2124	0.040542	0.076703	0.963776	1501	1	-4.2124
ATP5D	4	0.69443	0.81566	0.999998	15276	1	0.41381	0.040545	0.076709	0.963776	1502	2	0.41381
SOAT2	4	0.30771	0.52752	0.994807	9941	2	-1.6767	0.040563	0.076736	0.963776	1503	2	-1.6767
LGALS12	4	0.94008	0.94018	0.999998	17862	0	0.40783	0.040581	0.076756	0.963776	1504	2	0.40783
MDFIC	4	0.57038	0.72259	0.999998	13586	1	-0.074367	0.040595	0.076776	0.963776	1505	2	-0.074367
SORBS3	4	0.18383	0.36219	0.992673	6838	1	-0.020191	0.040647	0.076857	0.963776	1506	1	-0.020191
UBA2	4	0.12133	0.26956	0.984237	5176	3	-6.0106	0.0407	0.076933	0.963776	1507	1	-6.0106
MPZ	4	0.98248	0.98249	0.999998	18682	0	0.81501	0.040752	0.077004	0.963776	1508	2	0.81501
ZMPSTE24	4	0.21443	0.40524	0.993114	7660	3	-5.3697	0.040805	0.077075	0.963776	1509	1	-5.3697
KLB	4	0.82801	0.86545	0.999998	16332	1	-0.14212	0.0409	0.077221	0.963776	1510	2	-0.14212
CCNB1IP1	4	0.43721	0.62325	0.997342	11793	2	-3.6028	0.040909	0.077234	0.963776	1511	1	-3.6028
ACTN1	4	0.88507	0.89633	0.999998	16962	1	0.55301	0.040947	0.077299	0.963776	1512	2	0.55301
MED21	4	0.81105	0.85778	0.999998	16171	1	-1.4432	0.041014	0.077404	0.963776	1513	2	-1.4432
TAF7L	4	0.86217	0.88277	0.999998	16683	1	-2.3975	0.041119	0.077555	0.963776	1514	1	-2.3975
KDELR2	4	0.053291	0.15262	0.970602	2933	3	-6.4234	0.041171	0.077627	0.963776	1515	1	-6.4234
HIST1H4C	4	0.34175	0.55443	0.997342	10431	2	-1.6634	0.041184	0.077647	0.963776	1516	2	-1.6634
SPRR2G	4	0.70317	0.81829	0.999998	15335	1	0.16483	0.041208	0.077682	0.963776	1517	2	0.16483
HOXC10	3	0.83789	0.84109	0.999998	16424	1	1.3	0.041247	0.073828	0.963776	1518	2	1.3
TOP1MT	3	0.85089	0.85231	0.999998	16552	1	1.0155	0.041352	0.074019	0.963776	1519	2	1.0155
PSORS1C1	4	0.37921	0.5812	0.997342	10942	1	0.7501	0.041375	0.077959	0.963776	1520	2	0.7501
NPAS2	4	0.29942	0.51716	0.993114	9759	2	-3.2912	0.041433	0.078053	0.963776	1521	1	-3.2912
SS18L2	3	0.84502	0.84724	0.999998	16505	1	1.1733	0.041452	0.07418	0.963776	1522	2	1.1733
LMO1	4	0.84353	0.87289	0.999998	16478	1	0.16139	0.041482	0.078127	0.963776	1523	2	0.16139
ZC3H8	4	0.1393	0.29694	0.991831	5680	2	-3.0938	0.041486	0.078134	0.963776	1524	1	-3.0938
ZNF579	4	0.97745	0.97765	0.999998	18586	0	0.20887	0.041505	0.078167	0.963776	1525	2	0.20887
SUPT7L	4	0.92432	0.92541	0.999998	17570	1	-1.8525	0.041538	0.078206	0.963776	1526	1	-1.8525
PCDHA9	4	0.37921	0.5812	0.997342	10955	1	1.0555	0.041565	0.078246	0.963776	1527	2	1.0555
GYPC	4	0.14907	0.31154	0.992673	5932	1	0.092166	0.041577	0.078269	0.963776	1528	2	0.092166
SLCO6A1	4	0.10682	0.247	0.98229	4743	2	-4.6538	0.04159	0.078288	0.963776	1529	1	-4.6538
GNL3	3	0.77193	0.79208	0.999998	15826	1	-2.8038	0.041604	0.07443	0.963776	1530	1	-2.8038
SETBP1	4	0.92432	0.92541	0.999998	17582	1	1.0306	0.041625	0.078338	0.963776	1531	2	1.0306
PRR20A	4	0.43891	0.62451	0.997342	11831	1	-2.734	0.041643	0.078371	0.963776	1532	1	-2.734
SLC16A9	4	0.90011	0.9064	0.999998	17186	1	-1.3678	0.041672	0.078412	0.963776	1533	2	-1.3678
TMEM131	4	0.293	0.50902	0.993114	9593	1	-2.3461	0.041695	0.078438	0.963776	1534	1	-2.3461
SYT5	4	0.7265	0.8258	0.999998	15477	1	0.88895	0.041702	0.078446	0.963776	1535	2	0.88895
SLC39A13	4	0.17178	0.34498	0.992673	6535	2	-0.90485	0.041732	0.0785	0.963776	1536	2	-0.90485
CSTA	4	0.56152	0.7159	0.999998	13477	2	-1.7192	0.041792	0.078583	0.963776	1537	2	-1.7192
C19orf71	4	0.52197	0.68617	0.999998	12958	2	-1.8405	0.041826	0.078629	0.963776	1538	1	-1.8405
NR2E3	4	0.31023	0.5307	0.994807	10020	3	-4.5815	0.041826	0.078629	0.963776	1539	1	-4.5815
ARC	4	0.024384	0.076156	0.950916	1479	2	-2.8673	0.041846	0.078656	0.963776	1540	2	-2.8673
ENO4	4	0.60989	0.75298	0.999998	14126	2	-1.9245	0.041905	0.078755	0.963776	1541	2	-1.9245
OR4A15	4	0.85134	0.87684	0.999998	16556	1	0.77428	0.041923	0.078777	0.963776	1542	2	0.77428
CDKL4	3	0.99484	0.99497	0.999998	18955	0	1.0879	0.04199	0.075053	0.963776	1543	2	1.0879
PDE3B	4	0.089274	0.21936	0.979748	4219	3	-6.1963	0.042009	0.078909	0.963776	1544	1	-6.1963
PDE10A	4	0.047343	0.13761	0.969711	2638	3	-6.202	0.042114	0.079056	0.963776	1545	1	-6.202
LGR6	4	0.7516	0.83441	0.999998	15654	1	0.36985	0.042163	0.079127	0.963776	1546	2	0.36985
MOB3A	4	0.68756	0.8136	0.999998	15237	1	-0.43898	0.042166	0.079133	0.963776	1547	1	-0.43898
FAM110D	4	0.13915	0.29672	0.991831	5667	2	-1.0471	0.042187	0.079165	0.963776	1548	2	-1.0471
DRC1	4	0.86392	0.88376	0.999998	16711	1	-0.16994	0.042235	0.079225	0.963776	1549	2	-0.16994
ZDHHC4	4	0.25082	0.45435	0.993114	8570	1	-0.28642	0.042247	0.079244	0.963776	1550	2	-0.28642
SPATA18	4	0.39667	0.5939	0.997342	11193	2	-4.3836	0.042271	0.079274	0.963776	1551	1	-4.3836
ADAMTS18	4	0.44894	0.63176	0.998417	11977	2	-1.5498	0.042283	0.079296	0.963776	1552	2	-1.5498
RGMA	3	0.10009	0.221	0.979748	4542	1	0.090736	0.042313	0.075558	0.963776	1553	1	0.090736
PIRT	4	0.33928	0.55268	0.997342	10416	1	0.18356	0.042331	0.079366	0.963776	1554	2	0.18356
TNK2	4	0.48113	0.65561	0.999998	12415	1	-1.9822	0.042376	0.079432	0.963776	1555	1	-1.9822
BRD9	4	0.54303	0.70185	0.999998	13223	2	-1.7557	0.042427	0.079501	0.963776	1556	2	-1.7557
DTX3	4	0.93674	0.93682	0.999998	17805	1	-2.2115	0.042428	0.079502	0.963776	1557	1	-2.2115
TSPAN5	4	0.24321	0.44414	0.993114	8402	1	0.3255	0.042439	0.07952	0.963776	1558	2	0.3255
FAM50A	4	0.41457	0.60688	0.997342	11452	1	-3.5915	0.042559	0.079708	0.963776	1559	1	-3.5915
CCDC42B	4	0.55314	0.70945	0.999998	13353	1	-1.6469	0.042559	0.079708	0.963776	1560	1	-1.6469
PNLIP	4	0.32703	0.54386	0.997342	10255	2	-3.4413	0.042559	0.079708	0.963776	1561	1	-3.4413
STBD1	4	0.6432	0.77874	0.999998	14582	2	-4.249	0.042559	0.079708	0.963776	1562	1	-4.249
SMR3B	4	0.9916	0.99164	0.999998	18867	0	0.019614	0.042601	0.079783	0.963776	1563	2	0.019614
PLA2G10	3	0.97593	0.97612	0.999998	18560	0	0.98755	0.042616	0.076075	0.963776	1564	2	0.98755
RPL10L	4	0.42075	0.61133	0.997342	11575	1	0.69053	0.04265	0.079854	0.963776	1565	2	0.69053
ZNF12	4	0.80098	0.85349	0.999998	16073	1	0.056356	0.04269	0.079935	0.963776	1566	2	0.056356
CLDN25	4	0.93915	0.93923	0.999998	17838	0	0.49197	0.042752	0.08002	0.963776	1567	2	0.49197
COPS5	4	0.65103	0.78489	0.999998	14701	1	-4.0207	0.042794	0.080086	0.963776	1568	1	-4.0207
SPATA6	4	0.058683	0.16584	0.973112	3188	2	-2.8613	0.0428	0.080093	0.963776	1569	2	-2.8613
MRPL41	4	0.27669	0.48814	0.993114	9203	3	-5.1681	0.042847	0.080168	0.963776	1570	1	-5.1681
RLN3	4	0.20403	0.39066	0.993092	7367	2	-1.1265	0.042855	0.080179	0.963776	1571	2	-1.1265
C2CD4B	4	0.96809	0.96815	0.999998	18408	0	-0.12583	0.042855	0.080179	0.963776	1572	2	-0.12583
TGM6	4	0.52618	0.68932	0.999998	13031	1	-0.1716	0.042899	0.080243	0.963776	1573	2	-0.1716
MAF	3	0.2347	0.38472	0.992673	8171	1	0.95359	0.042908	0.076577	0.963776	1574	2	0.95359
RHOXF2B	3	0.89013	0.89019	0.999998	17035	0	-1.7626	0.042943	0.076633	0.963776	1575	1	-1.7626
B3GALTL	4	0.1253	0.27567	0.985922	5305	2	-3.8624	0.042951	0.080328	0.963776	1576	1	-3.8624
DAB2	4	0.97571	0.97589	0.999998	18555	0	0.52922	0.042988	0.080381	0.963776	1577	2	0.52922
MPPED2	4	0.14563	0.30638	0.991831	5826	2	-2.5315	0.042988	0.080381	0.963776	1578	2	-2.5315
TMEM184A	4	0.13893	0.29638	0.991831	5644	3	-4.4232	0.043004	0.080409	0.963776	1579	1	-4.4232
ARRDC1	4	0.96187	0.96189	0.999998	18291	0	-0.79749	0.043056	0.080487	0.963776	1580	1	-0.79749
TMEM259	4	0.21386	0.40445	0.993114	7605	1	-0.056711	0.043066	0.080497	0.963776	1581	2	-0.056711
ZNF565	4	0.18977	0.37065	0.992673	6996	3	-4.1564	0.043108	0.080565	0.963776	1582	1	-4.1564
GAL	3	0.83411	0.83796	0.999998	16386	1	1.0489	0.043147	0.076968	0.963776	1583	2	1.0489
KRTAP20-2	4	0.19902	0.38363	0.992673	7233	2	-2.2322	0.043157	0.080636	0.963776	1584	2	-2.2322
MAGI3	4	0.11821	0.26475	0.984237	5093	3	-4.8611	0.043161	0.08064	0.963776	1585	1	-4.8611
OR3A1	4	0.35709	0.56535	0.997342	10658	2	-1.9833	0.043212	0.080708	0.963776	1586	2	-1.9833
RABAC1	4	0.6368	0.77377	0.999998	14526	2	-3.0951	0.043213	0.08071	0.963776	1587	1	-3.0951
ANKHD1-EIF4EBP3	4	0.24437	0.44567	0.993114	8418	2	-2.4506	0.043248	0.080773	0.963776	1588	2	-2.4506
PLXNB3	4	0.25861	0.46468	0.993114	8751	2	-3.4049	0.043265	0.0808	0.963776	1589	1	-3.4049
PCDHGB6	4	0.17035	0.3429	0.992673	6470	1	-0.16167	0.043318	0.080868	0.963776	1590	1	-0.16167
SGTB	4	0.076652	0.19869	0.979074	3809	2	-2.6685	0.043339	0.080903	0.963776	1591	2	-2.6685
SEMA3D	4	0.030835	0.094093	0.956459	1834	2	-1.9001	0.043394	0.080994	0.963776	1592	2	-1.9001
LSS	4	0.71204	0.82106	0.999998	15380	1	-1.9086	0.043396	0.080999	0.963776	1593	1	-1.9086
NCKAP1L	4	0.52978	0.69196	0.999998	13063	1	-0.34696	0.043396	0.080999	0.963776	1594	2	-0.34696
SMIM11	3	0.93187	0.93197	0.999998	17715	0	0.74063	0.043455	0.077491	0.963776	1595	1	0.74063
CTSV	3	0.83411	0.83796	0.999998	16390	1	0.85494	0.043472	0.077526	0.963776	1596	2	0.85494
ZBTB2	4	0.94157	0.94165	0.999998	17881	0	-0.91428	0.043474	0.081121	0.963776	1597	1	-0.91428
TAGAP	4	0.82477	0.86392	0.999998	16294	1	-1.0101	0.043497	0.081149	0.963776	1598	2	-1.0101
RTP5	4	0.91161	0.91486	0.999998	17360	1	-2.6607	0.043527	0.081193	0.963776	1599	1	-2.6607
EBF2	3	0.45345	0.60862	0.997342	12048	1	0.94435	0.043544	0.077641	0.963776	1600	2	0.94435
DPAGT1	4	0.85134	0.87684	0.999998	16571	1	-2.6598	0.043579	0.081275	0.963776	1601	1	-2.6598
AGFG2	4	0.76403	0.83888	0.999998	15754	1	0.1573	0.043788	0.081607	0.963776	1602	1	0.1573
FAM135A	4	0.0081675	0.027563	0.892893	577	2	-3.7922	0.04384	0.081694	0.963776	1603	1	-3.7922
FRRS1	4	0.63611	0.77322	0.999998	14495	1	-3.0684	0.043893	0.081765	0.963776	1604	1	-3.0684
CCDC177	4	0.36501	0.57106	0.997342	10749	1	-0.050887	0.043917	0.081801	0.963776	1605	2	-0.050887
SLC26A8	4	0.85437	0.87847	0.999998	16595	1	-1.4994	0.043945	0.081845	0.963776	1606	1	-1.4994
NECAB3	4	0.51266	0.67913	0.999998	12863	1	0.26695	0.043978	0.081895	0.963776	1607	2	0.26695
SH3BGRL3	4	0.21539	0.40658	0.993114	7688	1	-2.4816	0.043997	0.081924	0.963776	1608	1	-2.4816
FCRL6	3	0.43868	0.59399	0.997342	11822	2	-4.7721	0.044085	0.078544	0.963776	1609	1	-4.7721
SEC14L4	4	0.4857	0.65901	0.999998	12484	2	-2.5061	0.044102	0.082078	0.963776	1610	1	-2.5061
TRIM47	4	0.4904	0.66249	0.999998	12547	1	0.32798	0.044137	0.082125	0.963776	1611	2	0.32798
RIBC2	4	0.10458	0.24348	0.98229	4667	3	-6.073	0.04418	0.082181	0.963776	1612	1	-6.073
GRID1	4	0.48833	0.66094	0.999998	12509	2	-3.8924	0.044259	0.0823	0.963776	1613	1	-3.8924
OR4K14	4	0.71417	0.82176	0.999998	15388	1	-0.32301	0.044284	0.082339	0.963776	1614	2	-0.32301
ARSB	4	0.86721	0.88563	0.999998	16737	1	-0.89429	0.044311	0.08238	0.963776	1615	2	-0.89429
MAMSTR	4	0.97014	0.97021	0.999998	18445	0	0.43176	0.044345	0.082424	0.963776	1616	2	0.43176
C6orf203	4	0.18945	0.3702	0.992673	6988	2	-2.1962	0.044363	0.082456	0.963776	1617	2	-2.1962
SMG8	4	0.1409	0.29933	0.991831	5698	3	-4.4964	0.044415	0.082525	0.963776	1618	1	-4.4964
MYADM	4	0.08627	0.21447	0.979074	4123	2	-5.1916	0.044494	0.082633	0.963776	1619	1	-5.1916
KDSR	4	0.92432	0.92541	0.999998	17558	1	-2.4956	0.044572	0.082746	0.963776	1620	1	-2.4956
TMEM244	4	0.96488	0.96493	0.999998	18339	0	0.55461	0.044578	0.082752	0.963776	1621	2	0.55461
PIH1D3	3	0.19969	0.34776	0.992673	7262	1	1.1351	0.044625	0.07941	0.963776	1622	2	1.1351
HBG1	4	0.27274	0.48312	0.993114	9115	2	-2.339	0.044658	0.082862	0.963776	1623	2	-2.339
OR10A7	4	0.2962	0.51309	0.993114	9701	3	-4.8804	0.044677	0.08289	0.963776	1624	1	-4.8804
FAM78B	4	0.76598	0.8396	0.999998	15768	1	0.18842	0.044713	0.082954	0.963776	1625	2	0.18842
ARHGAP11B	4	0.14347	0.30315	0.991831	5793	2	-2.5784	0.044726	0.082974	0.963776	1626	2	-2.5784
ARHGEF9	4	0.31622	0.53622	0.996221	10113	2	-2.2676	0.044738	0.082991	0.963776	1627	2	-2.2676
TMEM63C	4	0.72449	0.82514	0.999998	15456	1	0.58515	0.04475	0.08301	0.963776	1628	2	0.58515
ZNF576	4	0.18945	0.3702	0.992673	6985	2	-2.8637	0.044781	0.083057	0.963776	1629	1	-2.8637
SLC7A6OS	4	0.062137	0.17426	0.975616	3362	2	-1.0523	0.04486	0.083173	0.963776	1630	2	-1.0523
TACR1	4	0.62367	0.76363	0.999998	14338	2	-1.8948	0.04486	0.083173	0.963776	1631	1	-1.8948
C1orf52	4	0.84487	0.87357	0.999998	16487	1	-1.0141	0.044892	0.083214	0.963776	1632	2	-1.0141
GOLGA7B	4	0.6144	0.75647	0.999998	14184	1	-0.94073	0.044892	0.083214	0.963776	1633	2	-0.94073
GCDH	4	0.090637	0.22153	0.979748	4254	1	0.51005	0.044935	0.083278	0.963776	1634	2	0.51005
CHD2	4	0.60989	0.75298	0.999998	14118	2	-4.3588	0.04499	0.083353	0.963776	1635	1	-4.3588
HSPB6	4	0.96809	0.96815	0.999998	18396	0	-0.20486	0.045009	0.083378	0.963776	1636	2	-0.20486
FIBIN	4	0.40518	0.60004	0.997342	11319	2	-4.4644	0.045042	0.083429	0.963776	1637	1	-4.4644
GPR179	4	0.79431	0.85072	0.999998	16022	1	-1.4211	0.045046	0.083435	0.963776	1638	2	-1.4211
PLEKHH3	4	0.16311	0.33233	0.992673	6313	1	0.50715	0.04512	0.083542	0.963776	1639	2	0.50715
TLX1	3	0.98277	0.98291	0.999998	18693	0	1.0048	0.045141	0.080247	0.963776	1640	2	1.0048
C2orf49	4	0.33503	0.54958	0.997342	10358	1	-0.03461	0.045145	0.083573	0.963776	1641	2	-0.03461
TMEM214	4	0.75898	0.83704	0.999998	15706	1	0.43854	0.045145	0.083573	0.963776	1642	2	0.43854
CCDC180	4	0.90312	0.90856	0.999998	17229	1	-0.74528	0.045169	0.083614	0.963776	1643	2	-0.74528
MAPK11	4	0.91161	0.91486	0.999998	17345	1	0.66869	0.045194	0.083646	0.963776	1644	2	0.66869
WIPF3	4	0.97627	0.97647	0.999998	18561	0	0.81805	0.045206	0.083665	0.963776	1645	2	0.81805
ACVR2B	4	0.51586	0.68149	0.999998	12887	1	0.75046	0.04533	0.083846	0.963776	1646	2	0.75046
BLOC1S5	4	0.074875	0.19575	0.979074	3748	3	-3.9675	0.045356	0.083885	0.963776	1647	1	-3.9675
P2RY8	4	0.21386	0.40445	0.993114	7604	2	-1.8043	0.045379	0.083924	0.963776	1648	2	-1.8043
NAP1L5	4	0.31622	0.53622	0.996221	10104	2	-3.2309	0.045408	0.083972	0.963776	1649	1	-3.2309
BTN2A2	4	0.9692	0.96924	0.999998	18425	0	-0.19917	0.045454	0.08406	0.963776	1650	2	-0.19917
ARPC1B	4	0.83504	0.86884	0.999998	16399	1	-1.5767	0.04546	0.084074	0.963776	1651	2	-1.5767
MORC1	4	0.22858	0.42445	0.993114	7983	1	-4.3522	0.045512	0.08415	0.963776	1652	1	-4.3522
DCHS2	4	0.92074	0.92232	0.999998	17510	1	0.36853	0.045559	0.084209	0.963776	1653	2	0.36853
REL	4	0.5816	0.73118	0.999998	13756	2	-2.547	0.045565	0.084216	0.963776	1654	1	-2.547
ZNF232	4	0.46591	0.64425	0.999487	12212	2	-1.9592	0.045578	0.084232	0.963776	1655	2	-1.9592
ADGRL1	4	0.69979	0.81728	0.999998	15314	1	-0.44614	0.045615	0.084289	0.963776	1656	2	-0.44614
ACTR5	4	0.15439	0.31942	0.992673	6050	2	-4.1717	0.045617	0.084292	0.963776	1657	1	-4.1717
ATOH7	4	0.4904	0.66249	0.999998	12537	2	-1.939	0.045669	0.084376	0.963776	1658	1	-1.939
UHMK1	4	0.6216	0.76203	0.999998	14288	1	-0.029424	0.045714	0.084435	0.963776	1659	2	-0.029424
LRTOMT	4	0.92795	0.92861	0.999998	17628	1	0.85921	0.045789	0.084551	0.963776	1660	2	0.85921
DTNBP1	4	0.13539	0.291	0.990638	5562	3	-5.6481	0.045826	0.084607	0.963776	1661	1	-5.6481
ING4	4	0.87356	0.88936	0.999998	16823	1	0.56111	0.045826	0.084608	0.963776	1662	2	0.56111
CNGA1	4	0.24219	0.44276	0.993114	8342	3	-5.3587	0.045878	0.084698	0.963776	1663	1	-5.3587
FOXO4	4	0.89694	0.90418	0.999998	17155	1	0.5091	0.045907	0.084735	0.963776	1664	2	0.5091
SDS	4	0.93915	0.93923	0.999998	17857	0	-1.2729	0.045907	0.084735	0.963776	1665	2	-1.2729
KLRD1	4	0.019963	0.063608	0.950878	1255	3	-5.8156	0.045982	0.08486	0.963776	1666	1	-5.8156
CENPV	4	0.15221	0.31617	0.992673	5989	2	-3.9932	0.046034	0.084935	0.963776	1667	1	-3.9932
TNFRSF19	4	0.99732	0.99731	0.999998	19021	0	0.77982	0.046075	0.085003	0.963776	1668	2	0.77982
OR10R2	4	0.12719	0.2785	0.985922	5348	2	-3.7212	0.046087	0.085024	0.963776	1669	1	-3.7212
LYRM9	4	0.98017	0.98026	0.999998	18647	0	-0.94928	0.046139	0.085098	0.963776	1670	1	-0.94928
PBX2	4	0.74459	0.8319	0.999998	15600	1	0.40773	0.046156	0.085119	0.963776	1671	2	0.40773
PNO1	3	0.27535	0.4273	0.993114	9155	1	-1.1352	0.046169	0.08191	0.963776	1672	1	-1.1352
MUC6	4	0.28439	0.49812	0.993114	9401	2	-1.933	0.046191	0.085168	0.963776	1673	1	-1.933
TMEM8C	4	0.050255	0.14491	0.970602	2784	1	-0.00086114	0.046295	0.085334	0.963776	1674	1	-0.00086114
MYO5B	4	0.088167	0.21756	0.979748	4184	2	-2.1574	0.046324	0.085375	0.963776	1675	2	-2.1574
ADAMTSL2	4	0.041931	0.12377	0.969711	2396	3	-6.2595	0.046348	0.08541	0.963776	1676	1	-6.2595
GPD1	4	0.11455	0.25911	0.98229	4985	2	-2.622	0.046399	0.08548	0.963776	1677	2	-2.622
NBEAL1	4	0.28982	0.50501	0.993114	9495	3	-5.1158	0.0464	0.085481	0.963776	1678	1	-5.1158
PADI6	4	0.98249	0.98251	0.999998	18683	0	0.063283	0.046452	0.085559	0.963776	1679	1	0.063283
CTSG	4	0.51847	0.68352	0.999998	12905	2	-4.2172	0.046504	0.085633	0.963776	1680	1	-4.2172
ARHGEF35	4	0.52271	0.68673	0.999998	12972	2	-1.8748	0.046511	0.085644	0.963776	1681	2	-1.8748
CD36	4	0.0089185	0.029994	0.900098	620	3	-4.8826	0.046556	0.085711	0.963776	1682	1	-4.8826
UBQLN3	4	0.055879	0.15912	0.970602	3064	2	-2.8691	0.046599	0.085772	0.963776	1683	2	-2.8691
WBP4	3	0.24004	0.3903	0.993092	8298	1	1.2617	0.046602	0.082634	0.963776	1684	2	1.2617
ZGLP1	4	0.53978	0.69938	0.999998	13191	2	-2.3626	0.046608	0.085788	0.963776	1685	1	-2.3626
KLHL33	4	0.63296	0.77084	0.999998	14470	2	-3.1669	0.046661	0.085859	0.963776	1686	1	-3.1669
AP4E1	4	0.906	0.91067	0.999998	17282	1	-0.35387	0.046674	0.085881	0.963776	1687	2	-0.35387
SLC30A3	4	0.55522	0.71104	0.999998	13400	2	-3.7426	0.046713	0.085936	0.963776	1688	1	-3.7426
FSTL1	4	0.99534	0.99534	0.999998	18974	0	0.62251	0.046774	0.086033	0.963776	1689	2	0.62251
ADAMTS14	4	0.63236	0.7704	0.999998	14455	1	-1.4364	0.046812	0.086093	0.963776	1690	2	-1.4364
SEL1L	4	0.48737	0.66025	0.999998	12498	1	-0.010131	0.04685	0.086148	0.963776	1691	2	-0.010131
DAW1	4	0.51931	0.68415	0.999998	12943	1	-2.8088	0.046869	0.086175	0.963776	1692	1	-2.8088
TTC9	3	0.0082297	0.02225	0.86533	582	1	0.93637	0.046943	0.083165	0.963776	1693	2	0.93637
PHACTR3	4	0.42049	0.61113	0.997342	11563	2	-3.5563	0.046947	0.086296	0.963776	1694	1	-3.5563
RHPN1	4	0.55522	0.71104	0.999998	13373	2	-2.5916	0.046947	0.086296	0.963776	1695	1	-2.5916
YIPF6	4	0.43891	0.62451	0.997342	11839	2	-2.1106	0.046975	0.08633	0.963776	1696	2	-2.1106
CBFB	4	0.19457	0.37737	0.992673	7120	1	-1.6478	0.047078	0.086488	0.963776	1697	1	-1.6478
FADS1	4	0.95542	0.95546	0.999998	18148	0	0.69652	0.047107	0.086535	0.963776	1698	2	0.69652
SERPINC1	4	0.74798	0.83312	0.999998	15628	1	-2.4159	0.04713	0.086567	0.963776	1699	1	-2.4159
PRTFDC1	4	0.38852	0.58791	0.997342	11081	1	-0.31807	0.047151	0.086597	0.963776	1700	2	-0.31807
IFNA10	4	0.73021	0.82697	0.999998	15508	1	-0.79548	0.04722	0.086696	0.963776	1701	2	-0.79548
RAB2B	4	0.32703	0.54386	0.997342	10248	2	-4.4689	0.047234	0.08672	0.963776	1702	1	-4.4689
NPM2	4	0.70495	0.81883	0.999998	15341	1	-0.11005	0.047252	0.086748	0.963776	1703	2	-0.11005
FBLN5	4	0.47666	0.65232	0.999487	12359	2	-2.0354	0.047315	0.086841	0.963776	1704	2	-2.0354
MEA1	4	0.29527	0.5119	0.993114	9620	2	-4.5878	0.047339	0.08688	0.963776	1705	1	-4.5878
TDRKH	4	0.17961	0.35618	0.992673	6727	2	-4.196	0.047391	0.086954	0.963776	1706	1	-4.196
CPLX2	4	0.0075144	0.025525	0.882055	537	3	-6.871	0.047443	0.087034	0.963776	1707	1	-6.871
RPS3	3	0.81016	0.81895	0.999998	16148	1	1.0986	0.047489	0.084056	0.963776	1708	2	1.0986
ADRA1A	4	0.42583	0.61507	0.997342	11621	2	-2.3802	0.047495	0.087118	0.963776	1709	1	-2.3802
NAGPA	4	0.031949	0.097079	0.956459	1885	2	-2.9251	0.047567	0.087232	0.963776	1710	2	-2.9251
MDFI	4	0.32912	0.54539	0.997342	10267	2	-2.9829	0.047599	0.087288	0.963776	1711	1	-2.9829
FZD8	4	0.18243	0.36021	0.992673	6794	1	0.27653	0.047605	0.087296	0.963776	1712	2	0.27653
CCDC132	4	0.56007	0.71478	0.999998	13440	1	-0.38806	0.047617	0.087311	0.963776	1713	2	-0.38806
OLIG2	4	0.62367	0.76363	0.999998	14317	2	-2.2988	0.047651	0.087367	0.963776	1714	1	-2.2988
HPS6	4	0.82801	0.86545	0.999998	16333	1	-0.088638	0.047681	0.08742	0.963776	1715	2	-0.088638
ASNS	4	0.44188	0.62669	0.997342	11870	2	-1.8505	0.047725	0.087487	0.963776	1716	2	-1.8505
OLFML2B	3	0.028696	0.072314	0.950916	1709	1	1.2504	0.047735	0.084458	0.963776	1717	2	1.2504
UPF2	4	0.033063	0.10018	0.957718	1948	2	-3.0323	0.047744	0.087513	0.963776	1718	2	-3.0323
RFPL2	4	0.57376	0.72507	0.999998	13604	1	-0.20163	0.047782	0.087562	0.963776	1719	2	-0.20163
TULP3	4	0.29942	0.51716	0.993114	9735	2	-2.1565	0.047807	0.087604	0.963776	1720	2	-2.1565
SLC16A5	4	0.38556	0.58576	0.997342	11057	1	0.11395	0.047808	0.087605	0.963776	1721	2	0.11395
CRACR2A	4	0.93182	0.93212	0.999998	17693	1	0.66596	0.047858	0.087672	0.963776	1722	2	0.66596
BEX2	4	0.76967	0.84101	0.999998	15821	1	-0.033048	0.04786	0.087674	0.963776	1723	2	-0.033048
KRT14	4	0.33328	0.54831	0.997342	10332	2	-2.1364	0.047902	0.087744	0.963776	1724	2	-2.1364
ACBD7	4	0.16863	0.34037	0.992673	6438	2	-2.1025	0.047912	0.08776	0.963776	1725	1	-2.1025
TESK1	4	0.17961	0.35618	0.992673	6725	2	-2.48	0.04794	0.087797	0.963776	1726	2	-2.48
SPPL3	3	0.85218	0.85349	0.999998	16581	1	1.019	0.047954	0.084821	0.963776	1727	2	1.019
OTOS	4	0.96809	0.96815	0.999998	18393	0	-0.90521	0.047959	0.087829	0.963776	1728	2	-0.90521
LMBRD1	4	0.73382	0.82816	0.999998	15535	1	-2.601	0.047964	0.087837	0.963776	1729	1	-2.601
B4GALNT2	4	0.95086	0.95091	0.999998	18074	0	0.77384	0.047972	0.087853	0.963776	1730	2	0.77384
WTAP	4	0.61281	0.75524	0.999998	14167	2	-1.4654	0.048016	0.087915	0.963776	1731	1	-1.4654
RBMX	4	0.96187	0.96189	0.999998	18283	0	0.068864	0.048035	0.087941	0.963776	1732	2	0.068864
FAM101A	3	0.042443	0.10339	0.959421	2402	2	-6.8712	0.048054	0.085007	0.963776	1733	1	-6.8712
CCSER2	4	0.11516	0.26002	0.98229	4998	3	-4.5402	0.048068	0.087998	0.963776	1734	1	-4.5402
CRCT1	4	0.9606	0.96063	0.999998	18262	0	0.02506	0.048086	0.088019	0.963776	1735	2	0.02506
BRICD5	4	0.91565	0.9181	0.999998	17428	1	-0.91007	0.048172	0.088149	0.963776	1736	1	-0.91007
SAYSD1	4	0.40034	0.59653	0.997342	11240	2	-3.5555	0.048225	0.088233	0.963776	1737	1	-3.5555
SFSWAP	4	0.023818	0.074556	0.950916	1452	2	-1.5326	0.048232	0.088244	0.963776	1738	2	-1.5326
ZNF551	4	0.51204	0.67867	0.999998	12844	2	-2.0166	0.048327	0.088384	0.963776	1739	2	-2.0166
ZNF548	3	0.98963	0.98976	0.999998	18827	0	1.1446	0.048329	0.085469	0.963776	1740	2	1.1446
P2RX5	3	0.44124	0.59652	0.997342	11849	1	-0.51496	0.048368	0.085535	0.963776	1741	1	-0.51496
TNFRSF1B	4	0.989	0.98899	0.999998	18811	0	-0.46511	0.048381	0.08847	0.963776	1742	1	-0.46511
GOLGA2	4	0.24437	0.44567	0.993114	8422	2	-4.8217	0.048433	0.088536	0.963776	1743	1	-4.8217
EPB41L5	4	0.6216	0.76203	0.999998	14293	1	0.79916	0.04846	0.088576	0.963776	1744	2	0.79916
IL7R	4	0.001135	0.004103	0.760996	100	2	-5.1639	0.048537	0.088688	0.963776	1745	1	-5.1639
ZNF639	4	0.95845	0.95847	0.999998	18218	0	-1.1885	0.048589	0.088757	0.963776	1746	1	-1.1885
SEC63	4	0.71919	0.82343	0.999998	15429	1	0.22922	0.04862	0.088807	0.963776	1747	2	0.22922
INO80E	4	0.34712	0.55825	0.997342	10536	2	-4.8162	0.048641	0.088835	0.963776	1748	1	-4.8162
C5orf22	4	0.88089	0.89372	0.999998	16900	1	0.62859	0.048645	0.088841	0.963776	1749	2	0.62859
ZNF662	4	0.053291	0.15262	0.970602	2942	3	-6.2502	0.048693	0.088917	0.963776	1750	1	-6.2502
TOX4	4	0.73382	0.82816	0.999998	15519	1	0.32352	0.048734	0.088979	0.963776	1751	2	0.32352
GBP5	4	0.22345	0.41752	0.993114	7871	2	-2.3415	0.048747	0.088998	0.963776	1752	2	-2.3415
CROT	4	0.25123	0.45489	0.993114	8578	2	-2.4345	0.048773	0.089036	0.963776	1753	2	-2.4345
DOCK11	3	0.96786	0.96805	0.999998	18391	0	0.78606	0.048796	0.086199	0.963776	1754	2	0.78606
ARF4	4	0.96695	0.96699	0.999998	18376	0	-0.3857	0.048798	0.089079	0.963776	1755	1	-0.3857
GHITM	4	0.95756	0.95758	0.999998	18206	0	-0.62355	0.048798	0.08908	0.963776	1756	2	-0.62355
NAPG	4	0.94393	0.94404	0.999998	17934	0	-0.34354	0.048836	0.089137	0.963776	1757	2	-0.34354
UGT1A4	4	0.036237	0.10874	0.961256	2109	2	-2.7555	0.048849	0.089151	0.963776	1758	2	-2.7555
CALML4	4	0.28439	0.49812	0.993114	9404	2	-0.91319	0.04885	0.089152	0.963776	1759	2	-0.91319
EPS8	4	0.99845	0.99843	0.999998	19053	0	1.0052	0.048887	0.089199	0.963776	1760	2	1.0052
C9orf129	4	0.057701	0.16349	0.972586	3155	3	-6.136	0.048902	0.089214	0.963776	1761	1	-6.136
C16orf52	4	0.76967	0.84101	0.999998	15814	1	-1.3612	0.048939	0.089279	0.963776	1762	2	-1.3612
PLEKHA7	4	0.17658	0.35184	0.992673	6642	2	-3.2313	0.048954	0.089303	0.963776	1763	1	-3.2313
GRHL3	4	0.3296	0.54575	0.997342	10286	2	-4.8387	0.049058	0.08945	0.964375	1764	1	-4.8387
SAA1	3	0.86085	0.86137	0.999998	16678	1	-0.67652	0.049059	0.086624	0.963776	1765	2	-0.67652
ADORA3	4	0.90011	0.9064	0.999998	17194	1	0.84626	0.049118	0.089556	0.964375	1766	2	0.84626
HIST2H2AB	4	0.59252	0.73961	0.999998	13895	2	-1.521	0.049143	0.089594	0.964375	1767	2	-1.521
CCDC173	4	0.50648	0.67454	0.999998	12784	1	-0.42732	0.049162	0.089626	0.964375	1768	1	-0.42732
FOXRED1	4	0.03284	0.099549	0.957718	1942	3	-6.6938	0.049214	0.089707	0.964375	1769	1	-6.6938
SLK	4	0.25082	0.45435	0.993114	8561	1	-0.60887	0.049266	0.08979	0.964375	1770	2	-0.60887
GDI2	4	0.99831	0.99829	0.999998	19049	0	0.52203	0.049318	0.089876	0.964375	1771	2	0.52203
ELN	4	0.94393	0.94404	0.999998	17936	0	-2.0749	0.04937	0.089959	0.964375	1772	1	-2.0749
TGM5	4	0.2454	0.44706	0.993114	8442	2	-2.2593	0.049374	0.089965	0.964375	1773	2	-2.2593
TUBG2	4	0.29998	0.51786	0.993114	9776	2	-2.7094	0.049474	0.090123	0.964375	1774	1	-2.7094
MAP2	4	0.51586	0.68149	0.999998	12890	1	-0.1361	0.049489	0.090142	0.964375	1775	2	-0.1361
RBM12B	4	0.66109	0.79272	0.999998	14847	2	-0.66785	0.049502	0.090175	0.964375	1776	2	-0.66785
MAN1C1	4	0.48737	0.66025	0.999998	12492	1	-0.5403	0.049526	0.090207	0.964375	1777	2	-0.5403
C12orf77	3	0.44438	0.59966	0.997342	11910	2	-4.7402	0.049544	0.087422	0.963776	1778	1	-4.7402
SLC25A5	4	0.88507	0.89633	0.999998	16964	1	0.2606	0.049578	0.090289	0.964375	1779	2	0.2606
GJC2	4	0.84812	0.87523	0.999998	16535	1	-1.3849	0.049618	0.090343	0.964375	1780	2	-1.3849
TNC	4	0.92682	0.92759	0.999998	17605	1	0.4708	0.049631	0.090362	0.964375	1781	2	0.4708
HMCES	4	0.59604	0.74228	0.999998	13943	2	-2.1704	0.049683	0.090433	0.964375	1782	1	-2.1704
COPA	4	0.47143	0.64838	0.999487	12269	2	-3.0091	0.049683	0.090433	0.964375	1783	1	-3.0091
RNASE1	4	0.83876	0.87059	0.999998	16433	1	-1.3771	0.049683	0.090433	0.964375	1784	1	-1.3771
ZSWIM6	4	0.98532	0.98531	0.999998	18742	0	0.94949	0.049701	0.090465	0.964375	1785	2	0.94949
TMEM63B	4	0.079865	0.20406	0.979074	3908	2	-1.8782	0.049759	0.090564	0.964375	1786	2	-1.8782
TMEM151B	4	0.75525	0.83572	0.999998	15689	1	1.0351	0.049785	0.090597	0.964375	1787	2	1.0351
LGMN	3	0.55105	0.67592	0.999998	13335	1	-0.77822	0.049819	0.087861	0.963776	1788	1	-0.77822
RNF113B	4	0.91436	0.91705	0.999998	17409	1	-1.4777	0.049849	0.090697	0.964375	1789	2	-1.4777
OGFOD2	4	0.56548	0.71885	0.999998	13520	1	0.77016	0.049894	0.090768	0.964375	1790	2	0.77016
MMP26	4	0.48247	0.6566	0.999998	12446	2	-2.3426	0.049943	0.090843	0.964375	1791	2	-2.3426
ZRANB3	4	0.32069	0.53935	0.997194	10175	2	-2.3328	0.049965	0.090874	0.964375	1792	2	-2.3328
FLT4	4	0.25912	0.46539	0.993114	8814	2	-2.2964	0.049978	0.090895	0.964375	1793	2	-2.2964
SLC38A9	4	0.00065098	0.0023729	0.686994	65	3	-7.1421	0.050047	0.09099	0.964375	1794	1	-7.1421
KIAA1462	4	0.50972	0.67695	0.999998	12805	2	-1.6284	0.05012	0.091095	0.964375	1795	2	-1.6284
CRYAA	4	0.24219	0.44276	0.993114	8381	3	-4.9328	0.050151	0.091142	0.964375	1796	1	-4.9328
CD74	4	0.98586	0.98583	0.999998	18753	0	0.011275	0.050159	0.091151	0.964375	1797	2	0.011275
TMC1	4	0.6216	0.76203	0.999998	14291	1	-0.79871	0.050203	0.091214	0.964375	1798	1	-0.79871
F13A1	4	0.073192	0.19301	0.979074	3706	1	-0.28844	0.050262	0.091305	0.964375	1799	2	-0.28844
TYSND1	4	0.45808	0.63855	0.998582	12101	2	-0.83869	0.050307	0.091377	0.964375	1800	2	-0.83869
ZBED4	4	0.03868	0.11519	0.966762	2234	1	0.80972	0.050314	0.091392	0.964375	1801	2	0.80972
CD84	4	0.90011	0.9064	0.999998	17191	1	-1.9886	0.050359	0.09146	0.964375	1802	1	-1.9886
THNSL2	4	0.021666	0.068454	0.950916	1341	1	-0.32113	0.050365	0.091471	0.964375	1803	2	-0.32113
CELSR2	4	0.88953	0.89921	0.999998	17032	1	-1.6821	0.050463	0.091625	0.964375	1804	1	-1.6821
CADPS2	4	0.86392	0.88376	0.999998	16708	1	-1.0883	0.050469	0.091633	0.964375	1805	2	-1.0883
ANKRD9	4	0.13708	0.29354	0.991831	5620	1	0.3439	0.050482	0.091649	0.964375	1806	2	0.3439
HEPH	4	0.94157	0.94165	0.999998	17900	0	-0.75332	0.050527	0.091724	0.964375	1807	2	-0.75332
PCDH17	4	0.69794	0.81669	0.999998	15304	1	0.53706	0.050547	0.091758	0.964375	1808	2	0.53706
TXNDC8	3	0.95609	0.95639	0.999998	18164	0	-0.56623	0.050563	0.089065	0.963776	1809	1	-0.56623
ZNF44	4	0.77659	0.84362	0.999998	15862	1	0.26825	0.050619	0.091869	0.964375	1810	1	0.26825
LOC388813	4	0.6432	0.77874	0.999998	14618	2	-1.6083	0.050624	0.091884	0.964375	1811	2	-1.6083
DDHD1	4	0.73382	0.82816	0.999998	15532	1	-0.78312	0.050689	0.091978	0.964375	1812	2	-0.78312
ADORA2B	3	0.035421	0.087626	0.950916	2079	2	-5.5929	0.05072	0.089326	0.963776	1813	1	-5.5929
NETO1	4	0.35154	0.56143	0.997342	10579	2	-4.8945	0.050723	0.092028	0.964375	1814	1	-4.8945
MYL9	4	0.14138	0.30007	0.991831	5713	3	-5.7911	0.050775	0.09211	0.964375	1815	1	-5.7911
NFATC2IP	4	0.53116	0.69297	0.999998	13093	2	-3.6781	0.050827	0.0922	0.964375	1816	1	-3.6781
SSH3	4	0.18348	0.36167	0.992673	6812	3	-5.3	0.050879	0.092283	0.964375	1817	1	-5.3
C1orf100	4	0.9975	0.99749	0.999998	19023	0	1.068	0.05091	0.09232	0.964375	1818	2	1.068
ZNF395	4	0.60989	0.75298	0.999998	14110	2	-2.1988	0.050931	0.092348	0.964375	1819	1	-2.1988
ARPC4-TTLL3	4	0.91315	0.91608	0.999998	17383	1	-1.9997	0.050983	0.092419	0.964375	1820	1	-1.9997
GPR25	4	0.40369	0.59897	0.997342	11292	2	-1.8308	0.051035	0.092503	0.964375	1821	1	-1.8308
PLEKHG4	4	0.59975	0.74515	0.999998	14006	1	0.12855	0.051079	0.092577	0.964375	1822	2	0.12855
SLC35D1	4	0.52516	0.68856	0.999998	13006	2	-1.9671	0.051087	0.092589	0.964375	1823	2	-1.9671
TRIM21	4	0.56152	0.7159	0.999998	13464	2	-1.2008	0.051222	0.092784	0.964375	1824	2	-1.2008
KCNAB3	4	0.99572	0.99571	0.999998	18985	0	0.31266	0.051243	0.092815	0.964375	1825	1	0.31266
BSPRY	4	0.28023	0.49277	0.993114	9274	2	-4.0032	0.051295	0.092888	0.964375	1826	1	-4.0032
NF2	4	0.66205	0.79348	0.999998	14865	1	0.74562	0.051333	0.092944	0.964375	1827	2	0.74562
COL5A3	4	0.072957	0.19262	0.979074	3697	2	-4.1362	0.051347	0.092975	0.964375	1828	1	-4.1362
CCR1	4	0.39667	0.5939	0.997342	11203	1	-1.6629	0.051451	0.093133	0.964375	1829	2	-1.6629
ZNF580	4	0.39972	0.59606	0.997342	11228	1	-0.81598	0.051503	0.093212	0.964375	1830	1	-0.81598
NKIRAS1	4	0.05452	0.15573	0.970602	2993	3	-6.3509	0.051555	0.09328	0.964375	1831	1	-6.3509
TP53TG5	4	0.76967	0.84101	0.999998	15818	1	0.47536	0.05162	0.093376	0.964375	1832	2	0.47536
UGGT2	4	0.38556	0.58576	0.997342	11055	1	0.58789	0.051796	0.093646	0.964375	1833	2	0.58789
DCAF12L1	4	0.03994	0.11855	0.966791	2291	2	-2.6414	0.051836	0.093706	0.964375	1834	2	-2.6414
RBMX2	4	0.27832	0.49029	0.993114	9240	1	-1.8642	0.05184	0.093713	0.964375	1835	1	-1.8642
WDR93	4	0.68756	0.8136	0.999998	15236	1	-4.1977	0.05184	0.093713	0.964375	1836	1	-4.1977
ZNF404	4	0.99877	0.99876	0.999998	19062	0	0.83124	0.051875	0.093763	0.964375	1837	2	0.83124
ALOXE3	4	0.21681	0.40856	0.993114	7702	1	0.36361	0.051918	0.09382	0.964375	1838	2	0.36361
SPHK1	4	0.29766	0.51493	0.993114	9709	1	0.59789	0.051941	0.093852	0.964375	1839	2	0.59789
TANK	4	0.43628	0.62255	0.997342	11775	1	-0.36575	0.051967	0.093895	0.964375	1840	2	-0.36575
ALS2	4	0.42415	0.61384	0.997342	11613	1	-0.5691	0.051993	0.093935	0.964375	1841	2	-0.5691
ANKRD26	4	0.35442	0.56349	0.997342	10629	1	0.036416	0.052032	0.093996	0.964375	1842	2	0.036416
ZNF701	4	0.17616	0.35127	0.992673	6630	1	-1.4617	0.052074	0.094063	0.964375	1843	1	-1.4617
CCNB3	4	0.092096	0.22392	0.979748	4299	1	-0.51994	0.052085	0.094076	0.964375	1844	2	-0.51994
MAP4K5	4	0.24785	0.45037	0.993114	8516	3	-4.735	0.052126	0.094144	0.964375	1845	1	-4.735
SSNA1	4	0.70832	0.8199	0.999998	15348	1	-0.027928	0.052131	0.094149	0.964375	1846	2	-0.027928
TNFSF10	4	0.57454	0.72569	0.999998	13618	2	-2.5228	0.052178	0.094233	0.964375	1847	1	-2.5228
BRSK1	3	0.84001	0.8429	0.999998	16448	1	-1.767	0.052208	0.091747	0.964375	1848	1	-1.767
TP73	4	0.88655	0.89728	0.999998	16984	1	1.0252	0.052229	0.094311	0.964375	1849	2	1.0252
STRA13	4	0.7516	0.83441	0.999998	15649	1	-0.76512	0.05223	0.094313	0.964375	1850	1	-0.76512
SPDL1	4	0.95969	0.95971	0.999998	18230	0	-1.5142	0.052282	0.094411	0.964375	1851	2	-1.5142
E2F1	3	0.69837	0.74721	0.999998	15311	1	-1.617	0.052286	0.091886	0.964375	1852	1	-1.617
LMOD3	4	0.8909	0.90013	0.999998	17049	1	-1.3342	0.052288	0.094422	0.964375	1853	2	-1.3342
COL4A3	4	0.88359	0.89539	0.999998	16946	1	0.051832	0.052334	0.094488	0.964375	1854	2	0.051832
NCF2	4	0.42729	0.61617	0.997342	11662	1	0.83999	0.05236	0.094534	0.964375	1855	2	0.83999
TRAF3IP3	4	0.26571	0.47403	0.993114	8956	2	-3.1544	0.052386	0.094572	0.964375	1856	1	-3.1544
ZNF574	4	0.94157	0.94165	0.999998	17882	0	-1.4122	0.052439	0.094643	0.964375	1857	2	-1.4122
LRFN2	4	0.01858	0.059592	0.947958	1170	2	-3.1012	0.052466	0.094691	0.964375	1858	2	-3.1012
MUC13	4	0.91675	0.91898	0.999998	17445	1	-0.3875	0.052479	0.094701	0.964375	1859	2	-0.3875
CBX7	4	0.21443	0.40524	0.993114	7668	3	-5.4008	0.05249	0.094721	0.964375	1860	1	-5.4008
CD274	4	0.07172	0.19055	0.979074	3641	2	-1.9876	0.052512	0.094756	0.964375	1861	2	-1.9876
ACSL5	4	0.031949	0.097079	0.956459	1889	2	-3.8158	0.052542	0.094801	0.964375	1862	1	-3.8158
OR5AS1	4	0.90144	0.90735	0.999998	17203	1	0.040498	0.052624	0.094928	0.964375	1863	2	0.040498
CD200	4	0.34175	0.55443	0.997342	10444	1	0.19485	0.052637	0.094941	0.964375	1864	2	0.19485
TBC1D1	4	0.9938	0.99384	0.999998	18922	0	0.5496	0.052709	0.095045	0.964375	1865	2	0.5496
KRTAP13-4	4	0.38246	0.58353	0.997342	10996	1	-2.8435	0.052723	0.095069	0.964375	1866	1	-2.8435
BLNK	4	0.076652	0.19869	0.979074	3810	2	-4.2326	0.052723	0.095069	0.964375	1867	1	-4.2326
WDR45B	4	0.93783	0.93791	0.999998	17819	0	0.74261	0.052769	0.095138	0.964375	1868	2	0.74261
LGI2	4	0.64921	0.78349	0.999998	14673	2	-1.4985	0.052795	0.09518	0.964375	1869	2	-1.4985
CA5A	4	0.10231	0.23991	0.98229	4604	2	-1.6967	0.052808	0.095201	0.964375	1870	2	-1.6967
FAM127C	4	0.54647	0.70449	0.999998	13276	1	-2.9076	0.052853	0.095267	0.964375	1871	1	-2.9076
HUS1	4	0.28982	0.50501	0.993114	9491	3	-5.2549	0.052905	0.095345	0.964375	1872	1	-5.2549
ABCA2	4	0.90885	0.91278	0.999998	17323	1	-3.0112	0.052957	0.095425	0.964375	1873	1	-3.0112
TAS2R46	4	0.98106	0.98108	0.999998	18659	0	0.40124	0.052967	0.09544	0.964375	1874	2	0.40124
CES5A	4	0.0036717	0.01291	0.846551	286	1	-0.092953	0.052986	0.095474	0.964375	1875	2	-0.092953
TYROBP	4	0.94848	0.94853	0.999998	18020	0	-1.7147	0.053009	0.095505	0.964375	1876	1	-1.7147
IMP4	3	0.9209	0.92098	0.999998	17515	0	0.95064	0.053014	0.093067	0.964375	1877	2	0.95064
OR5H6	4	0.15225	0.31623	0.992673	5991	2	-3.3413	0.053061	0.095587	0.964375	1878	1	-3.3413
CFHR1	4	0.94157	0.94165	0.999998	17876	0	0.0077323	0.053086	0.095619	0.964375	1879	2	0.0077323
NFKBIE	3	0.64072	0.71711	0.999998	14576	1	-3.7617	0.053088	0.093188	0.964375	1880	1	-3.7617
ZFAND3	4	0.13289	0.28715	0.988741	5506	2	-2.545	0.053099	0.095637	0.964375	1881	2	-2.545
LUM	4	0.34237	0.55488	0.997342	10461	2	-4.4788	0.053113	0.095656	0.964375	1882	1	-4.4788
TXNDC16	4	0.38246	0.58353	0.997342	11002	2	-2.3774	0.053165	0.095728	0.964375	1883	1	-2.3774
CHORDC1	4	0.95859	0.95861	0.999998	18222	0	-0.3121	0.053191	0.09576	0.964375	1884	2	-0.3121
POLR2J3	3	0.45354	0.60871	0.997342	12050	2	-2.6241	0.053225	0.093414	0.964375	1885	1	-2.6241
TMEM160	4	0.83504	0.86884	0.999998	16408	1	-1.2134	0.053231	0.09583	0.964375	1886	2	-1.2134
RPS27L	4	0.78019	0.84506	0.999998	15910	1	0.44757	0.053268	0.095885	0.964375	1887	2	0.44757
HLA-DOB	4	0.67658	0.80499	0.999998	15065	1	0.62438	0.053317	0.095962	0.964375	1888	2	0.62438
ZEB1	4	0.82161	0.86248	0.999998	16260	1	0.8959	0.053317	0.095962	0.964375	1889	2	0.8959
OR9Q2	4	0.30771	0.52752	0.994807	9957	2	-2.7029	0.053372	0.096059	0.964375	1890	1	-2.7029
TMED4	4	0.44188	0.62669	0.997342	11851	1	-1.3137	0.053456	0.09618	0.964375	1891	2	-1.3137
SLC24A2	4	0.79431	0.85072	0.999998	16016	1	-0.34076	0.053476	0.09621	0.964375	1892	1	-0.34076
CALR3	4	0.59604	0.74228	0.999998	13979	2	-1.8345	0.053483	0.09622	0.964375	1893	2	-1.8345
PVALB	4	0.093455	0.22608	0.979748	4352	3	-6.1117	0.053554	0.096337	0.964375	1894	1	-6.1117
HOXA11	4	0.32504	0.54242	0.997269	10223	2	-2.7595	0.053554	0.096337	0.964375	1895	1	-2.7595
TM4SF5	3	0.59255	0.69413	0.999998	13904	1	0.34206	0.053576	0.093997	0.964375	1896	1	0.34206
APOL3	4	0.052879	0.15157	0.970602	2892	2	-2.3161	0.053632	0.096467	0.964375	1897	1	-2.3161
PRAMEF19	4	0.88677	0.89742	0.999998	16990	1	0.83147	0.053635	0.096473	0.964375	1898	2	0.83147
ARL1	4	0.094257	0.22735	0.979748	4373	1	0.32822	0.053682	0.096542	0.964375	1899	2	0.32822
GP1BA	3	0.78422	0.80035	0.999998	15941	1	0.95318	0.053703	0.09418	0.964375	1900	2	0.95318
TTLL6	4	0.96187	0.96189	0.999998	18290	0	-1.7243	0.053709	0.096583	0.964375	1901	1	-1.7243
SCD	4	0.92682	0.92759	0.999998	17606	1	-3.202	0.053709	0.096583	0.964375	1902	1	-3.202
IQGAP1	4	0.10159	0.23881	0.98229	4584	2	-2.2168	0.053748	0.096647	0.964375	1903	2	-2.2168
LGALS4	4	0.3296	0.54575	0.997342	10285	2	-2.9366	0.053787	0.096705	0.964375	1904	1	-2.9366
KRT80	4	0.92946	0.92993	0.999998	17645	1	0.018286	0.053839	0.096778	0.964375	1905	1	0.018286
TRIM26	4	0.4453	0.62912	0.998417	11922	2	-2.6341	0.053891	0.096857	0.964375	1906	1	-2.6341
DMC1	4	0.1654	0.33571	0.992673	6353	1	0.80058	0.053895	0.096861	0.964375	1907	2	0.80058
ZNF319	4	0.074039	0.19436	0.979074	3731	3	-6.1289	0.053943	0.096935	0.964375	1908	1	-6.1289
TRIB3	4	0.35709	0.56535	0.997342	10677	1	0.41482	0.053961	0.096961	0.964375	1909	2	0.41482
CHCHD7	4	0.53641	0.69683	0.999998	13139	2	-3.3755	0.053995	0.097012	0.964375	1910	1	-3.3755
OR2L3	3	0.76795	0.78943	0.999998	15788	1	0.16353	0.054006	0.094653	0.964375	1911	1	0.16353
ZMYND10	4	0.59252	0.73961	0.999998	13900	1	-0.29516	0.054028	0.097059	0.964375	1912	2	-0.29516
RAB11FIP5	4	0.047469	0.13795	0.969711	2650	2	-2.4885	0.054054	0.097092	0.964375	1913	2	-2.4885
SH3RF2	4	0.24437	0.44567	0.993114	8421	2	-2.4346	0.054094	0.097159	0.964375	1914	2	-2.4346
LCE6A	4	0.41745	0.60896	0.997342	11500	1	-0.31219	0.054134	0.097223	0.964375	1915	2	-0.31219
HYAL4	4	0.98098	0.98102	0.999998	18656	0	-1.1798	0.05415	0.097244	0.964375	1916	1	-1.1798
MYO9B	4	0.5331	0.69438	0.999998	13115	1	0.015411	0.054188	0.097296	0.964375	1917	2	0.015411
HSPA6	4	0.5772	0.72776	0.999998	13671	1	-0.69134	0.054268	0.09742	0.964375	1918	2	-0.69134
BMP2K	4	0.21681	0.40856	0.993114	7709	1	-0.19232	0.054281	0.097441	0.964375	1919	2	-0.19232
C15orf39	4	0.33262	0.54785	0.997342	10320	1	0.97327	0.054301	0.097467	0.964375	1920	2	0.97327
ZBTB18	4	0.0031593	0.01117	0.843747	243	3	-5.1986	0.054306	0.097473	0.964375	1921	1	-5.1986
POLR1D	3	0.99256	0.99268	0.999998	18882	0	0.9463	0.054494	0.095459	0.964375	1922	2	0.9463
MRGPRE	4	0.80776	0.85637	0.999998	16135	1	0.08464	0.054508	0.097806	0.964375	1923	2	0.08464
HRC	4	0.84192	0.87209	0.999998	16457	1	-0.8558	0.054513	0.097817	0.964375	1924	1	-0.8558
C10orf99	3	0.87748	0.87757	0.999998	16859	0	0.71923	0.054553	0.095554	0.964375	1925	2	0.71923
NOL11	4	0.040128	0.11905	0.9676	2307	2	-4.1294	0.054565	0.097893	0.964375	1926	1	-4.1294
PTPN6	4	0.95756	0.95758	0.999998	18199	0	-1.4748	0.054617	0.09797	0.964375	1927	1	-1.4748
PSG8	4	0.93182	0.93212	0.999998	17691	1	0.66137	0.054655	0.098019	0.964375	1928	2	0.66137
MANSC4	4	0.046374	0.13516	0.969711	2609	2	-4.7373	0.054721	0.098123	0.964375	1929	1	-4.7373
TCAIM	4	0.13708	0.29354	0.991831	5614	2	-2.4428	0.054742	0.098152	0.964375	1930	2	-2.4428
OR51B4	4	0.73759	0.82943	0.999998	15559	1	-0.22248	0.054762	0.098188	0.964375	1931	2	-0.22248
KRT28	4	0.07172	0.19055	0.979074	3635	2	-4.1948	0.054772	0.098202	0.964375	1932	1	-4.1948
LRRN2	4	0.97827	0.97843	0.999998	18593	0	-0.43186	0.054856	0.098327	0.964375	1933	2	-0.43186
RAMP1	4	0.010743	0.035778	0.900345	750	2	-3.8453	0.054928	0.098432	0.964375	1934	1	-3.8453
BTBD18	4	0.76794	0.84037	0.999998	15784	1	-0.29272	0.05493	0.098433	0.964375	1935	2	-0.29272
TET3	4	0.95542	0.95546	0.999998	18150	0	0.48435	0.055017	0.098555	0.964375	1936	2	0.48435
RAX	4	0.84337	0.87283	0.999998	16476	1	-0.41482	0.055032	0.098576	0.964375	1937	1	-0.41482
CPXCR1	4	0.067741	0.18396	0.979074	3523	2	-0.66456	0.055111	0.098697	0.964375	1938	2	-0.66456
FIG4	4	0.30649	0.52598	0.994807	9914	1	-0.85463	0.055135	0.098731	0.964375	1939	1	-0.85463
RNF225	4	0.37335	0.57705	0.997342	10879	1	-0.87302	0.055151	0.098758	0.964375	1940	2	-0.87302
S1PR5	4	0.08627	0.21447	0.979074	4135	2	-2.7323	0.055185	0.0988	0.964375	1941	2	-2.7323
OR5AR1	4	0.0097729	0.032731	0.900098	673	3	-6.8817	0.055187	0.098803	0.964375	1942	1	-6.8817
CHAC1	4	0.94969	0.94975	0.999998	18045	0	-1.6022	0.055239	0.098884	0.964375	1943	1	-1.6022
DUOXA1	4	0.12337	0.27268	0.984237	5226	2	-1.7192	0.055245	0.09889	0.964375	1944	2	-1.7192
RSRP1	4	0.9951	0.99511	0.999998	18967	0	0.65143	0.055272	0.098928	0.964375	1945	2	0.65143
CDT1	4	0.47143	0.64838	0.999487	12278	2	-4.4315	0.055291	0.098957	0.964375	1946	1	-4.4315
RMDN2	4	0.80098	0.85349	0.999998	16079	1	-1.069	0.055313	0.098993	0.964375	1947	2	-1.069
NR5A2	4	0.033644	0.10178	0.957718	1984	3	-6.3969	0.055394	0.09911	0.964375	1948	1	-6.3969
GTF2IRD2B	4	0.32018	0.53899	0.997194	10151	1	-0.26634	0.055467	0.099206	0.964375	1949	2	-0.26634
ADCK4	3	0.41673	0.57203	0.997342	11497	1	0.69091	0.055491	0.097151	0.964375	1950	2	0.69091
TMEM42	3	0.25132	0.4022	0.993114	8600	2	-5.4422	0.055491	0.097151	0.964375	1951	1	-5.4422
PLBD1	4	0.28744	0.50199	0.993114	9459	2	-2.7802	0.05555	0.099335	0.964375	1952	1	-2.7802
RNF181	2	0.69809	0.70017	0.999998	15305	1	-0.95487	0.055586	0.071676	0.963352	1953	1	-0.95487
CEP57L1	4	0.9751	0.97527	0.999998	18544	0	0.25112	0.055595	0.099393	0.964375	1954	2	0.25112
IRAK4	4	0.55659	0.71211	0.999998	13419	1	-3.3554	0.055601	0.0994	0.964375	1955	1	-3.3554
FOXK2	4	0.017019	0.055023	0.945597	1090	2	-5.2346	0.055653	0.099476	0.964375	1956	1	-5.2346
KRT81	4	0.38246	0.58353	0.997342	11008	1	0.4185	0.05569	0.099542	0.964375	1957	2	0.4185
PLEKHO1	4	0.82801	0.86545	0.999998	16335	1	-1.7345	0.055705	0.09957	0.964375	1958	1	-1.7345
CD163	4	0.041931	0.12377	0.969711	2388	3	-5.1545	0.055809	0.099721	0.964375	1959	1	-5.1545
OGT	4	0.8182	0.86093	0.999998	16235	1	-3.2568	0.05586	0.099801	0.964375	1960	1	-3.2568
ITPKC	4	0.95315	0.95322	0.999998	18110	0	-0.48174	0.055892	0.099843	0.964375	1961	2	-0.48174
MAZ	4	0.15944	0.32698	0.992673	6216	2	-4.1172	0.055912	0.099864	0.964375	1962	1	-4.1172
DNAJC12	4	0.51931	0.68415	0.999998	12930	1	0.71958	0.055926	0.099891	0.964375	1963	2	0.71958
TCTEX1D2	4	0.2962	0.51309	0.993114	9683	3	-3.6191	0.055964	0.099952	0.964375	1964	1	-3.6191
CLC	4	0.56376	0.71757	0.999998	13497	1	0.027972	0.055987	0.099986	0.964375	1965	2	0.027972
OR11G2	4	0.93182	0.93212	0.999998	17685	1	0.92608	0.056088	0.10014	0.964375	1966	2	0.92608
IFT140	4	0.6432	0.77874	0.999998	14592	2	-2.5035	0.056119	0.10019	0.964375	1967	1	-2.5035
USP34	4	0.74798	0.83312	0.999998	15634	1	-0.37697	0.056163	0.10024	0.964375	1968	2	-0.37697
HIST1H2AD	4	0.8909	0.90013	0.999998	17063	1	-2.0519	0.056171	0.10026	0.964375	1969	1	-2.0519
GMNN	4	0.89383	0.90205	0.999998	17086	1	-3.3979	0.056275	0.10044	0.964375	1970	1	-3.3979
KIAA0754	4	0.51525	0.68105	0.999998	12876	2	-0.88918	0.056291	0.10045	0.964375	1971	2	-0.88918
BRD3	4	0.28982	0.50501	0.993114	9494	3	-4.6545	0.056326	0.10052	0.964375	1972	1	-4.6545
ACKR3	4	0.48605	0.65927	0.999998	12487	1	0.47699	0.05642	0.10066	0.964375	1973	2	0.47699
CPA6	4	0.063801	0.17733	0.978498	3411	2	-4.0197	0.05643	0.10068	0.964375	1974	1	-4.0197
STARD5	4	0.20041	0.38563	0.992673	7307	2	-2.7178	0.056482	0.10075	0.964375	1975	1	-2.7178
CNOT4	4	0.99449	0.99452	0.999998	18947	0	0.52005	0.056542	0.10084	0.964375	1976	2	0.52005
FAM26E	4	0.12248	0.27132	0.984237	5207	2	-1.6892	0.056569	0.10089	0.964375	1977	2	-1.6892
PDE7B	4	0.11078	0.25325	0.98229	4864	1	-0.5285	0.056585	0.10092	0.964375	1978	2	-0.5285
LHX9	4	0.62705	0.76627	0.999998	14372	1	0.71896	0.05661	0.10094	0.964375	1979	2	0.71896
LILRB2	4	0.067074	0.18285	0.979074	3487	1	-0.61699	0.056637	0.10099	0.964375	1980	1	-0.61699
MYO1C	4	0.28744	0.50199	0.993114	9447	2	-2.2982	0.056651	0.10102	0.964375	1981	2	-2.2982
TSACC	4	0.98308	0.98309	0.999998	18705	0	-0.045659	0.056678	0.10106	0.964375	1982	2	-0.045659
ALKBH1	4	0.55314	0.70945	0.999998	13363	2	-2.0145	0.056741	0.10116	0.964375	1983	1	-2.0145
SIGLEC6	4	0.94244	0.94253	0.999998	17904	0	-1.7924	0.056792	0.10123	0.964375	1984	1	-1.7924
DCAF11	4	0.49299	0.66451	0.999998	12572	1	0.5065	0.056841	0.1013	0.964375	1985	2	0.5065
CELA1	4	0.96401	0.96406	0.999998	18319	0	-1.5665	0.056896	0.10139	0.964375	1986	1	-1.5665
UPRT	4	0.0291	0.089267	0.950916	1728	2	-5.2458	0.056948	0.10147	0.964375	1987	1	-5.2458
UQCC2	4	0.081181	0.20619	0.979074	3943	3	-5.9928	0.056999	0.10153	0.964375	1988	1	-5.9928
TPM3	4	0.093152	0.22559	0.979748	4331	2	-2.5786	0.057072	0.10164	0.964375	1989	2	-2.5786
ETV2	4	0.25123	0.45489	0.993114	8583	3	-3.7828	0.057103	0.10168	0.964375	1990	1	-3.7828
FLVCR1	4	0.81447	0.85926	0.999998	16207	1	0.85958	0.057181	0.10179	0.964375	1991	2	0.85958
COL26A1	4	0.25696	0.46246	0.993114	8710	1	-1.5632	0.057256	0.1019	0.964375	1992	2	-1.5632
STX12	4	0.51204	0.67867	0.999998	12846	2	-2.9697	0.057258	0.1019	0.964375	1993	1	-2.9697
MACC1	4	0.60344	0.74803	0.999998	14061	2	-3.0508	0.057361	0.10205	0.964375	1994	1	-3.0508
DOK6	4	0.63986	0.77611	0.999998	14553	1	0.0083514	0.057379	0.10208	0.964375	1995	2	0.0083514
HIST1H2BD	4	0.6104	0.75338	0.999998	14154	1	-0.70987	0.0574	0.10211	0.964375	1996	2	-0.70987
TCEAL4	4	0.60344	0.74803	0.999998	14072	1	0.045275	0.057413	0.10213	0.964375	1997	2	0.045275
RAB3B	4	0.65819	0.79042	0.999998	14803	1	-1.1388	0.057454	0.10219	0.964375	1998	2	-1.1388
GSTCD	4	0.75898	0.83704	0.999998	15716	1	-1.273	0.057502	0.10226	0.964375	1999	2	-1.273
PCDHGA7	3	0.72159	0.76055	0.999998	15439	1	0.78985	0.057553	0.10044	0.964375	2000	2	0.78985
[truncated: 17,108 more rows]
